# Supplementary material for: A high resolution atlas of gene expression in the domestic sheep (Ovis aries)
Source: PLoS Genet. 2017 Sep 15;13(9):e1006997. doi: 10.1371/journal.pgen.1006997 (PMC5626511; doi:10.1371/journal.pgen.1006997)
Supplement: S1 Table — (XLSX) [file pgen.1006997.s007.xlsx]

## Sheet: S1 Table
S1 Table. Overview of atlas tissue subsets.
Samples were collected from the following individuals in 2014.
Number of animals	Breed	Age	Sex	Atlas tissue subset
3	Scottish Blackface x Texel	2 years	Female	Core
3	Scottish Blackface x Texel	2 years	Male	Core
3	Scottish Blackface x Texel	Birth	1 male, 2 females	GI tract time series
3	Scottish Blackface x Texel	1 week	1 male, 2 females	GI tract time series
3	Scottish Blackface x Texel	8 weeks	2 males, 1 female	GI tract time series
2	Scottish Blackface x Texel	2 years - 23 days gestation	Female	Reproductive time series
2	Scottish Blackface x Texel	2 years - 35 days gestation	Female	Reproductive time series
2	Scottish Blackface x Texel	2 years - 100 days gestation	Female	Reproductive time series
3	Scottish Blackface x Texel	Day 23 embryo	Male	Early development
3	Scottish Blackface x Texel	Day 35 embryo	2 females, 1 male	Early development
3	Scottish Blackface x Texel	Day 100 embryo	Female	Early development
3	(IVF) Unknown x Texel	Day 7 blastocysts (pools of 8 blasts)	N/A	Early development
