# Supplementary material for: A high resolution atlas of gene expression in the domestic sheep (Ovis aries)
Source: PLoS Genet. 2017 Sep 15;13(9):e1006997. doi: 10.1371/journal.pgen.1006997 (PMC5626511; doi:10.1371/journal.pgen.1006997)
Supplement: S8 Table — (XLSX) [file pgen.1006997.s014.xlsx]

## Sheet: S8 Table
S8 Table. Candidate gene names for unannotated Oar v3.1 protein-coding genes: shortlist.
The annotation decision tree and associated quality categories are explained in S1 Methods.
Ensembl gene ID	Ensembl protein ID	No. of other Ensembl gene IDs assigned this gene name	Ensembl gene IDs assigned this gene name (if > 1)	Gene name	Description	Quality category	Nearest human RefSeq, for alignments >= 50% length of target protein (% identity in the aligned region, alignment length as % of the length of the target protein)	Nearest ruminant RefSeq, for alignments >= 50% of target protein (species: % identity in the aligned region, alignment length as a % of length of the target protein)	No. of alignments in NCBI nr	No. of alignments in NCBI nr to a ruminant genus (Ovis [but not aries], Capra [goat], Bos [cow, yak], Bubalus [buffalo], Bison [bison], Camelus [camel], Vicugna [alpaca], Pantholops [antelope])	% of alignments in NCBI nr to a ruminant genus	No. of genera this gene can align to	No. of ruminant genera this gene can align to	Highest % of alignments with the same hit name, irrespective of species	Name with highest % of hits	Potential alternative descriptions (i.e. from the minority alignments)	Gene order conservation compared to cattle: no. of genes conserved in syntenic region, not including gene of interest (number given only if gene of interest can also be found in cattle)	Gene order conservation compared to cattle (no. of conserved genes downstream of gene of interest, no. of conserved genes upstream of gene of interest)	First upstream gene pair that goes out-of-sync with cattle (sheep gene/cattle gene) (listed only if sheep gene is unannotated)	Genes in syntenic region, including gene of interest	First downstream gene pair that goes out-of-sync with cattle (sheep gene/cattle gene) (listed only if sheep gene is unannotated)
ENSOARG00000000039	ENSOARP00000000014	0	.	OR52A1	olfactory receptor family 52 subfamily A member 1	6	.	XP_012019958.2 (Ovis aries musimon: 99.023% identity in aln 98.1% length of target)	3	2	66.7	1	2	33.3	olfactory receptor 52A1	.	.	.	.	.	.
ENSOARG00000000059	ENSOARP00000000038	1	ENSOARG00000012930	OR5W2	olfactory receptor family 5 subfamily W member 2	1	.	XP_012028387.1 (Ovis aries musimon: 94.2% identity in aln 96.6% length of target) | XP_005701941.1 (Capra hircus: 93.5% identity in aln 98.7% length of target) | XP_002693660.1 (Bos taurus: 91.6% identity in aln 98.7% length of target) | XP_006072873.1 (Bubalus bubalis: 91.9% identity in aln 98.7% length of target) | XP_010831224.1 (Bison bison bison: 91.6% identity in aln 98.7% length of target)…	6	6	100	5	6	100	olfactory receptor 5W2	.	.	.	.	.	.
ENSOARG00000000062	ENSOARP00000000041	1	.	VN1R4	VN1R4	1	.	XP_005902754.1 (Bos mutus: 92.027% identity in aln 97.4% length of target)XP_005902754.1 (Bos mutus: 92.0% identity in aln 97.4% length of target)	3	2	66.7	1	1	100	vomeronasal type-1 receptor 4	.	0	0	.	.	.
ENSOARG00000000067	ENSOARP00000000045	0	.	ANP32A	acidic nuclear phosphoprotein 32 family member A	1	NP_006296.1 (92.7% identity in aln 94.0% length of target)	XP_005685209.1 (Capra hircus: 94.9% identity in aln 94.0% length of target) | XP_005211416.1 (Bos taurus: 98.3% identity in aln 97.5% length of target) | XP_006176656.1 (Camelus ferus: 91.9% identity in aln 92.9% length of target)	51	4	7.8	53	3	82.4	acidic leucine-rich nuclear phosphoprotein 32 family member A	RecName: Full=Acidic leucine-rich nuclear phosphoprotein 32 family member A; AltName: Full=Inhibitor-1 of protein phosphatase type 2A | acidic leucine-rich nuclear phosphoprotein 32 family member A-like | ANP32A protein | cerebellar leucine rich acidic nuclear protein | acidic (leucine-rich) nuclear phosphoprotein 32 family, member A variant	.	.	.	.	.
ENSOARG00000000070	ENSOARP00000000047	1	ENSOARG00000001465	GIMAP7	GTPase, IMAP family member 7	1	.	XP_013832259.1 (Capra hircus: 96.575% identity in aln 100.0% length of target)XP_012028277.1 (Ovis aries musimon: 91.8% identity in aln 100.0% length of target) | XP_013832259.1 (Capra hircus: 96.6% identity in aln 100.0% length of target) | XP_005960722.1 (Pantholops hodgsonii: 96.2% identity in aln 100.0% length of target)	3	3	100	2	3	100	GTPase IMAP family member 7-like	.	.	.	.	.	.
ENSOARG00000000073	ENSOARP00000000052	1	ENSOARG00000002384	SRSF10	serine and arginine rich splicing factor 10	1	.	XP_005676907.1 (Capra hircus: 96.9% identity in aln 100.0% length of target) | XP_005203328.1 (Bos taurus: 97.7% identity in aln 100.0% length of target)	50	3	6	98	3	90	serine/arginine-rich splicing factor 10	serine/arginine-rich splicing factor 10 isoform 1 | neural specific sr protein NSSR 1 | serine/arginine-rich splicing factor 10-like | serine/arginine-rich splicing factor 10 isoform 2 | FUS interacting protein (serine-arginine rich) 1 isoform 2 variant	0	0	.	.	.
ENSOARG00000000077	ENSOARP00000000056	0	.	MRPS2	mitochondrial ribosomal protein S2	3	.	XP_006042997.1 (Bubalus bubalis: 91.411% identity in aln 65.2% length of target)XP_011973313.1 (Ovis aries musimon: 96.3% identity in aln 56.6% length of target) | XP_006042997.1 (Bubalus bubalis: 91.4% identity in aln 65.2% length of target)	2	2	100	1	2	100	28S ribosomal protein S2, mitochondrial	.	0	0	.	.	.
ENSOARG00000000081	ENSOARP00000000058	0	.	TAF15	TATA-binding protein-associated factor 2N	8	.	.	0	0	0	0	0	0	.	.	0	0	.	.	.
ENSOARG00000000087	ENSOARP00000000063	0	.	WSB1	WD repeat and SOCS box-containing protein 1	8	.	.	0	0	0	0	0	0	.	.	0	0	.	.	.
ENSOARG00000000120	ENSOARP00000000099	0	.	ZNF160	zinc finger protein 160-like	8	.	.	0	0	0	0	0	0	.	.	.	.	.	.	.
ENSOARG00000000126	ENSOARP00000000105	2	ENSOARG00000007930, ENSOARG00000018422	RPL5	ribosomal protein L5	1	NP_000960.2 (94.3% identity in aln 100.0% length of target)	NP_001030383.1 (Bos taurus: 94.9% identity in aln 100.0% length of target) | XP_006197385.1 (Vicugna pacos: 93.3% identity in aln 100.0% length of target) | XP_005983309.1 (Pantholops hodgsonii: 94.6% identity in aln 100.0% length of target)	143	6	4.2	137	4	92.3	60S ribosomal protein L5	60S ribosomal protein L5-like | mCG1026389 | ribosomal protein L5 variant | Chain n, Structure Of A Mammalian Ribosomal 60s Subunit Within An 80s Complex Obtained By Docking Homology Models Of The Rna And Proteins Into An 8.7 A Cryo-em Map | Ribosomal protein L5 | Chain D, Structure Of The Mammalian 60s Ribosomal Subunit (this Entry Contains The Large Ribosomal Proteins) | 60S ribosomal protein L…	.	.	.	.	.
ENSOARG00000000127	ENSOARP00000000108	0	.	EID1	EP300-interacting inhibitor of differentiation 1	8	.	.	0	0	0	0	0	0	.	.	.	.	.	.	.
ENSOARG00000000134	ENSOARP00000000112	0	.	ZNF160	zinc finger protein 160-like	8	.	.	0	0	0	0	0	0	.	.	.	.	.	.	.
ENSOARG00000000147	ENSOARP00000000129	0	.	ZNF282	zinc finger protein 282	3	.	XP_011998601.1 (Ovis aries musimon: 99.7% identity in aln 58.1% length of target)	52	1	1.9	41	1	84.6	zinc finger protein 282	zinc finger protein 282 isoform 1 | zinc finger protein 282 isoform 2 | zinc finger protein 282 (predicted), isoform CRA_a | repressor protein | Zfp282 protein | zinc finger protein 282 (predicted), isoform CRA_c | zinc finger protein 282, isoform CRA_a | ZNF282 protein	2	-1,+1	.	ZNF398,ZNF282,ZNF212	.
ENSOARG00000000148	ENSOARP00000000126	0	.	PPP1R14B	protein phosphatase 1 regulatory inhibitor subunit 14B	8	.	.	0	0	0	0	0	0	.	.	.	.	.	.	.
ENSOARG00000000161	ENSOARP00000000144	1	ENSOARG00000011693	CAPZA2	capping actin protein of muscle Z-line alpha subunit 2	1	NP_006127.1 (98.3% identity in aln 100.0% length of target)	NP_001013016.1 (Bos taurus: 99.7% identity in aln 100.0% length of target)	65	1	1.5	81	1	100	capping actin protein of muscle Z-line alpha subunit 2	.	13	-8,+5	ENSOARG00000001954/LINC00998	PPP1R3A,FOXP2,MDFIC,TFEC,TES,CAV2,CAV1,MET,CAPZA2,ST7,WNT2,ASZ1,CFTR,CTTNBP2	.
ENSOARG00000000183	ENSOARP00000000161	0	.	POU4F1	POU class 4 homeobox 1	4	.	.	52	3	5.8	42	3	82.7	POU domain, class 4, transcription factor 1	Brn-3.0=POU-domain protein | POU domain factor | octamer binding transcription factor 1 | Brn3a | class V POU transcription factor | Brn-3a protein - mouse | POU domain, class 4, transcription factor 3 | class IV POU transcription factor gene Brn-3a product | POU domain, class 4, transcription factor 1, isoform CRA_a	.	.	.	.	.
ENSOARG00000000204	ENSOARP00000000184	1	.	OR51G1	OR51G1	1	.	XP_012020005.1 (Ovis aries musimon: 98.4% identity in aln 96.2% length of target) | XP_005689975.1 (Capra hircus: 97.4% identity in aln 96.2% length of target) | XP_005909249.1 (Bos mutus: 93.7% identity in aln 93.5% length of target) | XP_010842899.1 (Bison bison bison: 93.5% identity in aln 96.2% length of target) | XP_005984084.1 (Pantholops hodgsonii: 97.4% identity in aln 93.9% length of tar…	7	6	85.7	4	5	100	olfactory receptor 51G1	.	0	0	ENSOARG00000000290/ENSBTAG00000039134	.	ENSOARG00000007569/ENSBTAG00000037474
ENSOARG00000000227	ENSOARP00000000220	0	.	DCAF4	DDB1 and CUL4 associated factor 4	1	.	XP_014963359.1 (Ovis aries musimon: 99.8% identity in aln 100.0% length of target) | XP_005686094.1 (Capra hircus: 99.2% identity in aln 100.0% length of target) | NP_001019691.1 (Bos taurus: 96.6% identity in aln 100.0% length of target) | XP_006055257.1 (Bubalus bubalis: 97.0% identity in aln 100.0% length of target) | XP_010854109.1 (Bison bison bison: 96.4% identity in aln 100.0% length of ta…	8	7	87.5	6	6	100	DDB1- and CUL4-associated factor 4	.	1	0,+1	.	DCAF4,ZFYVE1	.
ENSOARG00000000239	ENSOARP00000000228	0	.	TIMM17A	translocase of inner mitochondrial membrane 17 homolog A (yeast)	2	.	XP_005955279.1 (Pantholops hodgsonii: 99.4% identity in aln 87.6% length of target)	5	2	40	5	2	100	mitochondrial import inner membrane translocase subunit Tim17-A	.	0	0	ENSOARG00000000119/LMOD1	.	.
ENSOARG00000000240	ENSOARP00000000225	0	.	VSTM2B	V-set and transmembrane domain containing 2B	4	.	.	9	5	55.6	5	4	88.9	V-set and transmembrane domain-containing protein 2B	V-set and transmembrane domain-containing protein 2B-like	0	0	.	.	.
ENSOARG00000000241	ENSOARP00000000227	0	.	RPL9	ribosomal protein L9	6	.	NP_001019640.2 (Bos taurus: 100.000% identity in aln 100.0% length of target)	131	13	9.9	148	5	72.5	60S ribosomal protein L9	.	.	.	.	.	.
ENSOARG00000000255	ENSOARP00000000247	0	.	ATRIP	ATR interacting protein	1	.	XP_014960980.1 (Ovis aries musimon: 99.368% identity in aln 100.0% length of target)XP_014960980.1 (Ovis aries musimon: 99.4% identity in aln 100.0% length of target) | XP_013829041.1 (Capra hircus: 99.0% identity in aln 100.0% length of target)	4	4	100	1	2	100	ATR-interacting protein	.	29	-4,+25	ENSOARG00000001285/ENSBTAG00000003022	NME6,SPINK8,PLXNB1,CCDC51,ATRIP,TREX1,SHISA5,PFKFB4,UCN2,COL7A1,UQCRC1,TMEM89,SLC26A6,CELSR3,NCKIPSD,IP6K2,PRKAR2A,SLC25A20,ARIH2,P4HTM,WDR6,DALRD3,NDUFAF3,IMPDH2,QRICH1,QARS,USP19,LAMB2,CCDC71,KLHDC8B	.
ENSOARG00000000275	ENSOARP00000000262	1	.	YWHAE	YWHAE	1	NP_006752.1 (95.3% identity in aln 91.4% length of target)	XP_005975824.1 (Pantholops hodgsonii: 95.3% identity in aln 99.6% length of target)	114	2	1.8	162	2	78.1	14-3-3 protein epsilon	14-3-3 protein epsilon-like | myosin-Ic-like isoform 2 | 14-3-3 protein epsilon isoform 1 | Homo sapiens tyrosine 3-monooxygenase/tryptophan 5-monooxygenase activation protein, epsilon polypeptide | YWHAE/FAM22A fusion protein | Chain A, Complex Of 14-3-3 Isoform Epsilon, A Mlf1 Phosphopeptide And A Small Fragment Hit From A Fbdd Screen | 14-3-3 protein epsilon isoform 2 | tyrosine 3-monooxygenas…	0	0	.	.	ENSOARG00000017991/DOC2B
ENSOARG00000000293	ENSOARP00000000282	0	.	NEUROG2	neurogenin 2	4	.	XP_006047047.1 (Bubalus bubalis: 96.269% identity in aln 49.6% length of target)	3	3	100	3	3	100	neurogenin-2	.	1	0,+1	ENSOARG00000002340/ENSBTAG00000013198	NEUROG2,ALPK1	ENSOARG00000002961/TIFA
ENSOARG00000000303	ENSOARP00000000293	0	.	NPDC1	neural proliferation, differentiation and control 1	6	.	XP_012016414.1 (Ovis aries musimon: 100.000% identity in aln 24.0% length of target)	4	4	100	2	3	75	neural proliferation differentiation and control protein 1	.	0	0	.	.	.
ENSOARG00000000311	ENSOARP00000000304	0	.	NPDC1	neural proliferation, differentiation and control 1	4	.	.	21	5	23.8	14	4	90.5	neural proliferation differentiation and control protein 1	neural proliferation differentiation and control protein 1 precursor-like protein | neural proliferation differentiation and control protein 1 precursor	0	0	.	.	.
ENSOARG00000000315	ENSOARP00000000309	1	.	POLR3F	POLR3F	1	.	NP_001033237.1 (Bos taurus: 99.7% identity in aln 100.0% length of target) | XP_006182897.1 (Camelus ferus: 98.4% identity in aln 100.0% length of target) | XP_006206236.1 (Vicugna pacos: 98.7% identity in aln 100.0% length of target)	80	4	5	111	4	95	DNA-directed RNA polymerase III subunit RPC6	DNA-directed RNA polymerase III 39 kDa polypeptide F variant | DNA-directed RNA polymerase III subunit RPC6 isoform 1 | DNA-directed RNA polymerase III subunit RPC6 isoform 2 | POLR3F	4	-2,+2	ENSOARG00000018453/KAT14	ZNF133,DZANK1,POLR3F,RBBP9,SEC23B	.
ENSOARG00000000323	ENSOARP00000000313	5	ENSOARG00000004748, ENSOARG00000016189, ENSOARG00000016203, ENSOARG00000016249, ENSOARG00000016698	OR7A17	olfactory receptor family 7 subfamily A member 17	1	.	XP_005701863.1 (Capra hircus: 98.742% identity in aln 98.8% length of target)XP_005701863.1 (Capra hircus: 98.7% identity in aln 98.8% length of target) | XP_010804961.1 (Bos taurus: 91.2% identity in aln 98.8% length of target)	3	3	100	2	2	100	olfactory receptor 7A17	.	.	.	.	.	.
ENSOARG00000000359	ENSOARP00000000354	8	ENSOARG00000000443, ENSOARG00000000528, ENSOARG00000000546, ENSOARG00000000597, ENSOARG00000000628, ENSOARG00000000704, ENSOARG00000002294, ENSOARG00000015929	SLC7A3	solute carrier family 7 member 3	1	.	XP_012026838.1 (Ovis aries musimon: 99.676% identity in aln 100.0% length of target)XP_012026838.1 (Ovis aries musimon: 99.7% identity in aln 100.0% length of target) | XP_005976511.1 (Pantholops hodgsonii: 93.7% identity in aln 100.0% length of target)	2	2	100	1	2	100	cationic amino acid transporter 3-like	.	0	0	ENSOARG00000000370/ENSBTAG00000023277	.	.
ENSOARG00000000371	ENSOARP00000000363	0	.	BEX2	brain expressed X-linked 2	8	.	.	0	0	0	0	0	0	.	.	.	.	.	.	.
ENSOARG00000000388	ENSOARP00000000383	1	ENSOARG00000014367	PYURF	PIGY upstream reading frame	1	.	NP_001033191.2 (Bos taurus: 99.1% identity in aln 100.0% length of target) | XP_006043320.1 (Bubalus bubalis: 98.2% identity in aln 100.0% length of target) | XP_005972509.1 (Pantholops hodgsonii: 98.2% identity in aln 100.0% length of target)	5	4	80	5	4	100	protein preY, mitochondrial	.	3	-3,0	ENSOARG00000018595/ENSBTAG00000033346	FAM13A,NAP1L5,HERC3,PYURF	.
ENSOARG00000000390	ENSOARP00000000385	0	.	UVRAG	UV radiation resistance associated	8	.	.	0	0	0	0	0	0	.	.	0	0	.	.	.
ENSOARG00000000391	ENSOARP00000000386	0	.	CRTC2	CREB-regulated transcription coactivator 2	8	.	.	0	0	0	0	0	0	.	.	.	.	.	.	.
ENSOARG00000000408	ENSOARP00000000404	0	.	RPL4	ribosomal protein L4	8	.	.	0	0	0	0	0	0	.	.	.	.	.	.	.
ENSOARG00000000410	ENSOARP00000000410	0	.	EI24	EI24, autophagy associated transmembrane protein	8	.	.	0	0	0	0	0	0	.	.	0	0	.	.	.
ENSOARG00000000436	ENSOARP00000000434	0	.	RNF168	ring finger protein 168	8	.	.	0	0	0	0	0	0	.	.	.	.	.	.	.
ENSOARG00000000441	ENSOARP00000000441	0	.	BNIP3L	BCL2 interacting protein 3 like	8	.	.	0	0	0	0	0	0	.	.	0	0	.	.	.
ENSOARG00000000443	ENSOARP00000000443	8	ENSOARG00000000359, ENSOARG00000000528, ENSOARG00000000546, ENSOARG00000000597, ENSOARG00000000628, ENSOARG00000000704, ENSOARG00000002294, ENSOARG00000015929	SLC7A3	solute carrier family 7 member 3	1	.	XP_012026828.1 (Ovis aries musimon: 98.232% identity in aln 100.0% length of target)XP_012026828.1 (Ovis aries musimon: 98.2% identity in aln 100.0% length of target) | XP_006068560.1 (Bubalus bubalis: 90.8% identity in aln 100.0% length of target)	2	2	100	1	2	100	cationic amino acid transporter 3-like	.	0	0	.	.	ENSOARG00000000407/TEX11
ENSOARG00000000447	ENSOARP00000000447	1	ENSOARG00000014379	PIGY	phosphatidylinositol glycan anchor biosynthesis class Y	1	NP_001036081.1 (95.8% identity in aln 100.0% length of target)	XP_011972718.1 (Ovis aries musimon: 98.6% identity in aln 100.0% length of target) | NP_001257875.1 (Bos taurus: 95.8% identity in aln 100.0% length of target) | XP_006043319.1 (Bubalus bubalis: 97.2% identity in aln 100.0% length of target) | XP_010858475.1 (Bison bison bison: 95.8% identity in aln 100.0% length of target)	74	5	6.8	85	4	79.7	phosphatidylinositol N-acetylglucosaminyltransferase subunit Y	phosphatidylinositol N-acetylglucosaminyltransferase subunit Y-like | Phosphatidylinositol N-acetylglucosaminyltransferase subunit Y	.	.	.	.	.
ENSOARG00000000451	ENSOARP00000000452	1	ENSOARG00000000967	OLA1	Obg like ATPase 1	1	.	XP_005676004.1 (Capra hircus: 100.0% identity in aln 100.0% length of target) | XP_005907299.1 (Bos mutus: 99.5% identity in aln 100.0% length of target) | NP_001039510.1 (Bos taurus: 99.7% identity in aln 100.0% length of target) | XP_010831175.1 (Bison bison bison: 96.2% identity in aln 100.0% length of target) | XP_006174828.1 (Camelus ferus: 98.0% identity in aln 100.0% length of target)	82	6	7.3	107	5	89	obg-like ATPase 1	obg-like ATPase 1 isoform a | OLA1 | obg-like ATPase 1-like | Obg-like ATPase 1 | homologous yeast-44.2 protein | obg-like ATPase 1-like isoform 1 | obg-like ATPase 1 isoform 1 | DKFZp761C10121 | obg-like ATPase 1-like protein	1	0,+1	ENSOARG00000000427/SP9	OLA1,SP3	.
ENSOARG00000000468	ENSOARP00000000470	1	ENSOARG00000016743	NFYB	nuclear transcription factor Y subunit beta	1	NP_006157.1 (99.5% identity in aln 100.0% length of target)	NP_001073254.1 (Bos taurus: 99.5% identity in aln 100.0% length of target) | XP_010851718.1 (Bison bison bison: 99.5% identity in aln 100.0% length of target) | XP_014422337.1 (Camelus ferus: 99.5% identity in aln 100.0% length of target)	136	3	2.2	140	3	97.1	nuclear transcription factor Y subunit beta	nuclear transcription factor Y subunit beta-like | CCAAT-binding factor | nuclear transcription factor Y subunit beta-like protein	0	0	.	.	.
ENSOARG00000000480	ENSOARP00000000484	0	.	MOCS1	molybdenum cofactor synthesis 1	1	.	XP_011967232.1 (Ovis aries musimon: 99.7% identity in aln 99.5% length of target) | XP_013829278.1 (Capra hircus: 98.3% identity in aln 99.5% length of target) | XP_005896488.1 (Bos mutus: 97.0% identity in aln 99.5% length of target) | XP_015315267.1 (Bos taurus: 96.8% identity in aln 100.0% length of target) | XP_006074782.1 (Bubalus bubalis: 96.3% identity in aln 99.4% length of target) | XP_0…	9	8	88.9	5	6	77.8	molybdenum cofactor biosynthesis protein 1	Molybdenum cofactor biosynthesis protein 1 | molybdenum cofactor biosynthesis protein 1 isoform a	.	.	.	.	.
ENSOARG00000000494	ENSOARP00000000497	4	ENSOARG00000008422, ENSOARG00000009331, ENSOARG00000009350, ENSOARG00000017657	MAGEA10	MAGE family member A10	1	.	XP_005967917.1 (Pantholops hodgsonii: 94.681% identity in aln 95.9% length of target)XP_005967917.1 (Pantholops hodgsonii: 94.7% identity in aln 95.9% length of target)	2	2	100	2	2	100	melanoma-associated antigen 10-like	.	.	.	.	.	.
ENSOARG00000000505	ENSOARP00000000513	0	.	CACNA1B	calcium voltage-gated channel subunit alpha1 B	4	.	.	70	3	4.3	35	3	85.7	voltage-dependent N-type calcium channel subunit alpha-1B	voltage-dependent N-type calcium channel subunit alpha-1B isoform 2 | voltage-dependent N-type calcium channel subunit alpha-1B-like | Voltage-dependent N-type calcium channel subunit alpha-1B | rCG45627, isoform CRA_a | rCG45627, isoform CRA_b | voltage-dependent N-type calcium channel subunit alpha-1B isoform 1 | N-type calcium channel alpha1 subunit	0	0	.	.	.
ENSOARG00000000518	ENSOARP00000000523	0	.	CACNA1B	calcium voltage-gated channel subunit alpha1 B	8	.	.	0	0	0	0	0	0	.	.	7	-7,0	.	NSMF,PNPLA7,MRPL41,DPH7,ZMYND19,ARRDC1,EHMT1,CACNA1B	.
ENSOARG00000000526	ENSOARP00000000532	0	.	DEFB119	defensin beta 119	1	.	XP_005688400.1 (Capra hircus: 98.8% identity in aln 100.0% length of target) | XP_006060739.1 (Bubalus bubalis: 94.0% identity in aln 100.0% length of target) | XP_005960844.1 (Pantholops hodgsonii: 100.0% identity in aln 100.0% length of target)	4	4	100	4	4	75	beta-defensin 119	beta-defensin 119 precursor	.	.	.	.	.
ENSOARG00000000531	ENSOARP00000000560	0	.	ARHGEF18	rho guanine nucleotide exchange factor 18	8	.	.	0	0	0	0	0	0	.	.	.	.	.	.	.
ENSOARG00000000546	ENSOARP00000000552	8	ENSOARG00000000359, ENSOARG00000000443, ENSOARG00000000528, ENSOARG00000000597, ENSOARG00000000628, ENSOARG00000000704, ENSOARG00000002294, ENSOARG00000015929	SLC7A3	solute carrier family 7 member 3	1	.	XP_013832505.1 (Capra hircus: 94.346% identity in aln 97.2% length of target)XP_013832505.1 (Capra hircus: 94.3% identity in aln 97.2% length of target) | XP_006068582.1 (Bubalus bubalis: 92.9% identity in aln 100.0% length of target) | XP_005976507.1 (Pantholops hodgsonii: 94.5% identity in aln 100.0% length of target)	3	3	100	3	3	100	cationic amino acid transporter 3-like	.	0	0	ENSOARG00000000589/ENSBTAG00000023277	.	ENSOARG00000000597/TEX11
ENSOARG00000000560	ENSOARP00000000567	0	.	ZNF160	zinc finger protein 160-like	8	.	.	0	0	0	0	0	0	.	.	.	.	.	.	.
ENSOARG00000000570	ENSOARP00000000585	0	.	MDM2	MDM2 proto-oncogene	8	.	.	0	0	0	0	0	0	.	.	5	-5,0	ENSOARG00000001742/ENSBTAG00000015395	IL22,MDM1,RAP1B,NUP107,SLC35E3,MDM2	ENSOARG00000017790/CPM
ENSOARG00000000590	ENSOARP00000000605	1	.	HNRNPK	HNRNPK	1	.	XP_013821523.1 (Capra hircus: 99.8% identity in aln 97.0% length of target) | XP_005896711.1 (Bos mutus: 99.6% identity in aln 100.0% length of target) | NP_001029734.1 (Bos taurus: 99.8% identity in aln 98.9% length of target)	45	4	8.9	79	2	75.6	heterogeneous nuclear ribonucleoprotein K	heterogeneous nuclear ribonucleoprotein K-like | phosphoprotein | heterogeneous nuclear ribonucleoprotein K isoform 2 | transformation upregulated nuclear protein | heterogeneous nuclear ribonucleoprotein K, isoform CRA_d | heterogeneous nuclear ribonucleoprotein K transcript variant | heterogeneous nuclear ribonucleoprotein K, isoform CRA_e | heterogeneous nuclear ribonucleoprotein K isoform a |…	0	0	.	.	.
ENSOARG00000000595	ENSOARP00000000615	1	.	RPS12	RPS12	1	NP_001007.2 (93.9% identity in aln 100.0% length of target)	XP_006055305.1 (Bubalus bubalis: 93.2% identity in aln 100.0% length of target) | XP_005967604.1 (Pantholops hodgsonii: 93.2% identity in aln 100.0% length of target)	73	3	4.1	178	2	95.9	40S ribosomal protein S12	Chain r, M48s Late-stage Initiation Complex, Purified From Rabbit Reticulocytes Lysates, Displaying Eif2 Ternary Complex And Eif3 I And G Subunits Relocated To The Intersubunit Face | Chain M, Structure Of The 80s Mammalian Ribosome Bound To Eef2 (this Entry Contains The Small Ribosomal Subunit) | Chain M, Structure Of The Human 40s Ribosomal Proteins	.	.	.	.	.
ENSOARG00000000596	ENSOARP00000000610	1	ENSOARG00000014827	CCDC25	coiled-coil domain containing 25	1	.	XP_013821316.1 (Capra hircus: 90.9% identity in aln 100.0% length of target) | NP_001030216.1 (Bos taurus: 92.8% identity in aln 100.0% length of target) | XP_006194068.1 (Camelus ferus: 91.8% identity in aln 100.0% length of target)	36	6	16.7	41	4	91.7	coiled-coil domain-containing protein 25	Coiled-coil domain-containing protein 25 | coiled-coil domain containing 25, isoform CRA_e | coiled-coil domain-containing protein 25-like	0	0	.	.	.
ENSOARG00000000604	ENSOARP00000000618	0	.	EVA1B	eva-1 homolog B	4	.	.	57	9	15.8	48	8	96.5	protein eva-1 homolog B	Protein FAM176B | protein eva-1 homolog B isoform 1	7	0,+7	ENSOARG00000009569/STK40	EVA1B,SH3D21,THRAP3,MAP7D1,TRAPPC3,COL8A2,ADPRHL2,TEKT2	ENSOARG00000000577/AGO3
ENSOARG00000000606	ENSOARP00000000620	0	.	MUSTN1	musculoskeletal, embryonic nuclear protein 1	1	NP_995325.3 (90.2% identity in aln 100.0% length of target)	XP_014333932.1 (Bos mutus: 98.8% identity in aln 100.0% length of target) | NP_001035679.1 (Bos taurus: 95.1% identity in aln 100.0% length of target)	19	4	21.1	23	3	84.2	musculoskeletal, embryonic nuclear protein 1	musculoskeletal embryonic nuclear protein 1-like isoform 1 | musculoskeletal embryonic nuclear protein 1-like | transmembrane protein 110	.	.	.	.	.
ENSOARG00000000613	ENSOARP00000000626	1	.	KCTD8	KCTD8	1	.	XP_012026605.1 (Ovis aries musimon: 100.000% identity in aln 93.0% length of target)XP_012026605.1 (Ovis aries musimon: 100.0% identity in aln 93.0% length of target)	3	3	100	2	3	100	BTB/POZ domain-containing protein KCTD8	.	.	.	.	.	.
ENSOARG00000000628	ENSOARP00000000648	8	ENSOARG00000000359, ENSOARG00000000443, ENSOARG00000000528, ENSOARG00000000546, ENSOARG00000000597, ENSOARG00000000704, ENSOARG00000002294, ENSOARG00000015929	SLC7A3	solute carrier family 7 member 3	1	.	XP_005692992.1 (Capra hircus: 97.4% identity in aln 100.0% length of target) | XP_006068592.1 (Bubalus bubalis: 96.0% identity in aln 100.0% length of target) | XP_005976530.1 (Pantholops hodgsonii: 97.9% identity in aln 100.0% length of target)	4	4	100	4	4	75	cationic amino acid transporter 3-like	cationic amino acid transporter 3	0	0	ENSOARG00000000597/ENSBTAG00000023277	.	.
ENSOARG00000000647	ENSOARP00000000665	0	.	KIF11	kinesin family member 11	1	.	XP_005698271.1 (Capra hircus: 99.1% identity in aln 100.0% length of target) | XP_006073751.1 (Bubalus bubalis: 98.2% identity in aln 99.9% length of target) | XP_010840501.1 (Bison bison bison: 98.4% identity in aln 99.9% length of target) | XP_005958916.1 (Pantholops hodgsonii: 99.0% identity in aln 100.0% length of target)	5	5	100	4	5	100	kinesin-like protein KIF11	.	12	-12,0	.	HTR7,RPP30,ANKRD1,PCGF5,HECTD2,PPP1R3C,TNKS2,FGFBP3,BTAF1,CPEB3,MARCH5,IDE,KIF11	.
ENSOARG00000000655	ENSOARP00000000670	0	.	UGT2C1	UGT2C1	8	.	.	0	0	0	0	0	0	.	.	.	.	.	.	.
ENSOARG00000000660	ENSOARP00000000676	0	.	BTF3	transcription factor BTF3	8	.	.	0	0	0	0	0	0	.	.	0	0	.	.	.
ENSOARG00000000672	ENSOARP00000000689	0	.	OR4F4	olfactory receptor family 4 subfamily F member 4	1	.	XP_002690754.1 (Bos taurus: 96.4% identity in aln 97.8% length of target) | XP_010855661.1 (Bison bison bison: 96.4% identity in aln 94.4% length of target) | XP_006194523.1 (Camelus ferus: 94.4% identity in aln 97.4% length of target) | XP_006218167.1 (Vicugna pacos: 94.4% identity in aln 97.4% length of target)	15	6	40	12	6	80	olfactory receptor 4F4	olfactory receptor 4F4-like | olfactory receptor 4F17	.	.	.	.	.
ENSOARG00000000704	ENSOARP00000000725	8	ENSOARG00000000359, ENSOARG00000000443, ENSOARG00000000528, ENSOARG00000000546, ENSOARG00000000597, ENSOARG00000000628, ENSOARG00000002294, ENSOARG00000015929	SLC7A3	solute carrier family 7 member 3	1	.	XP_005976528.1 (Pantholops hodgsonii: 94.222% identity in aln 99.2% length of target)XP_005976528.1 (Pantholops hodgsonii: 94.2% identity in aln 99.2% length of target)	1	1	100	1	1	100	cationic amino acid transporter 3-like	.	0	0	ENSOARG00000000721/ENSBTAG00000023277	.	.
ENSOARG00000000717	ENSOARP00000000736	1	ENSOARG00000019787	NDUFA5	NADH:ubiquinone oxidoreductase subunit A5	1	.	NP_787023.1 (Bos taurus: 94.8% identity in aln 100.0% length of target) | XP_006060638.1 (Bubalus bubalis: 94.0% identity in aln 100.0% length of target)	10	3	30	10	3	100	NADH dehydrogenase [ubiquinone] 1 alpha subcomplex subunit 5	.	7	-4,+3	ENSOARG00000001193/ENSBTAG00000004640	HYAL4,WASL,LMOD2,ASB15,NDUFA5,IQUB,SLC13A1,TAS2R16	.
ENSOARG00000000725	ENSOARP00000000747	0	.	ZAK	mitogen-activated protein kinase kinase kinase MLT	8	.	.	0	0	0	0	0	0	.	.	2	-1,+1	ENSOARG00000019644/PDK1	RAPGEF4,ZAK,CDCA7	.
ENSOARG00000000726	ENSOARP00000000748	0	.	PTGR2	prostaglandin reductase 2	1	NP_689657.1 (91.5% identity in aln 100.0% length of target)	XP_005686114.1 (Capra hircus: 99.7% identity in aln 100.0% length of target) | NP_001068717.1 (Bos taurus: 98.9% identity in aln 100.0% length of target) | XP_006046641.1 (Bubalus bubalis: 98.6% identity in aln 100.0% length of target) | XP_010854075.1 (Bison bison bison: 98.6% identity in aln 100.0% length of target) | XP_006184556.1 (Camelus ferus: 92.3% identity in aln 100.0% length of target)…	51	7	13.7	47	7	94.1	prostaglandin reductase 2	Chain A, Crystal Structure Of Human 15-Ketoprostaglandin Delta-13- Reductase In Complex With Nadp And 15-Keto-Pge2 | Chain A, Crystal Structure Of Human Zinc-binding Alcohol Dehydrogenase 1 (zadh1) In Ternary Complex With Nadp And 18beta-glycyrrhetinic Acid | RecName: Full=Prostaglandin reductase 2; Short=PRG-2; AltName: Full=15-oxoprostaglandin 13-reductase	.	.	.	.	.
ENSOARG00000000746	ENSOARP00000000764	0	.	FAM25A	family with sequence similarity 25 member A	1	.	XP_015316541.1 (Bos taurus: 95.5% identity in aln 100.0% length of target) | XP_006217452.1 (Vicugna pacos: 91.0% identity in aln 100.0% length of target)	14	8	57.1	11	6	85.7	protein FAM25A	Protein FAM25 | protein FAM25C-like	.	.	.	.	.
ENSOARG00000000751	ENSOARP00000000771	0	.	C3	complement C3	6	.	XP_013820690.1 (Capra hircus: 95.678% identity in aln 44.3% length of target)	1	1	100	1	1	100	complement C3	.	0	0	.	.	.
ENSOARG00000000753	ENSOARP00000000775	1	ENSOARG00000016293	WDR61	WD repeat domain 61	1	.	NP_001033186.1 (Bos taurus: 100.0% identity in aln 100.0% length of target) | XP_006173552.1 (Camelus ferus: 99.3% identity in aln 100.0% length of target)	132	3	2.3	139	3	91.7	WD repeat-containing protein 61	WD repeat-containing protein 61 isoform a | WD repeat-containing protein 61-like isoform 2 | WD repeat domain 61, isoform CRA_b | Meiotic recombination REC14 protein-like protein | G protein beta subunit-like protein | REC14 | Chain A, Crystal Structure Of The Wd Repeat-Containing Protein 61 | WD repeat domain 61, isoform CRA_a | WD repeat-containing protein 61-like | ecombination protein REC14	9	-1,+8	ENSOARG00000000802/IREB2	CRABP1,WDR61,DNAJA4,ACSBG1,IDH3A,CIB2,SH2D7,TBC1D2B,ADAMTS7,OTUD7A	ENSOARG00000000166/ENSBTAG00000015775
ENSOARG00000000775	ENSOARP00000000791	0	.	ZMYND19	zinc finger MYND-type containing 19	4	.	.	88	8	9.1	85	7	92	zinc finger MYND domain-containing protein 19	Zinc finger MYND domain-containing protein 19 | zinc finger MYND domain-containing protein 19 isoform 1 | zinc finger MYND domain-containing protein 19-like	7	-3,+4	.	CACNA1B,EHMT1,ARRDC1,ZMYND19,DPH7,MRPL41,PNPLA7,NSMF	.
ENSOARG00000000782	ENSOARP00000000799	2	ENSOARG00000004530, ENSOARG00000019797	ZCRB1	zinc finger CCHC-type and RNA binding motif containing 1	1	NP_149105.3 (98.2% identity in aln 100.0% length of target)	XP_011987293.1 (Ovis aries musimon: 99.1% identity in aln 100.0% length of target) | NP_001020489.1 (Bos taurus: 99.5% identity in aln 100.0% length of target) | XP_006189507.1 (Camelus ferus: 97.2% identity in aln 100.0% length of target)	62	5	8.1	76	4	87.1	zinc finger CCHC-type and RNA-binding motif-containing protein 1	zinc finger CCHC-type and RNA-binding motif-containing protein 1-like | zinc finger CCHC-type and RNA-binding motif-containing protein 1 isoform 1 | mCG19744, isoform CRA_b | Zinc finger CCHC-type and RNA binding motif 1	0	0	.	.	.
ENSOARG00000000786	ENSOARP00000000810	0	.	ANKRD63	ankyrin repeat domain 63	3	.	XP_011987324.1 (Ovis aries musimon: 99.5% identity in aln 51.8% length of target) | XP_006073096.1 (Bubalus bubalis: 97.0% identity in aln 51.8% length of target)	16	2	12.5	16	2	93.8	ankyrin repeat domain-containing protein 63	ankyrin repeat domain-containing protein 63-like	1	-1,0	ENSOARG00000020183/C15orf52	PLCB2,ANKRD63	ENSOARG00000020143/ENSBTAG00000019076
ENSOARG00000000798	ENSOARP00000000823	2	ENSOARG00000003902, ENSOARG00000017473	HIGD1A	HIG1 hypoxia inducible domain family member 1A	1	.	XP_013828899.1 (Capra hircus: 97.8% identity in aln 100.0% length of target) | XP_005901855.1 (Bos mutus: 97.8% identity in aln 100.0% length of target) | NP_001070582.1 (Bos taurus: 97.8% identity in aln 100.0% length of target) | XP_006181396.1 (Camelus ferus: 91.4% identity in aln 100.0% length of target) | XP_006200754.1 (Vicugna pacos: 90.3% identity in aln 100.0% length of target) | XP_0059…	40	13	32.5	30	6	82.5	HIG1 domain family member 1A, mitochondrial	HIG1 domain family member 1A, mitochondrial-like | HIG1 domain family member 1A	.	.	.	.	.
ENSOARG00000000835	ENSOARP00000000860	0	.	PNP	purine nucleoside phosphorylase	4	.	.	17	6	35.3	11	5	76.5	purine nucleoside phosphorylase	purine nucleoside phosphorylase-like | purine nucleoside phosphorylase isoform 1 | purine nucleoside phosphorylase isoform 2	.	.	.	.	.
ENSOARG00000000845	ENSOARP00000000866	0	.	GSG1L	GSG1 like	2	.	XP_005697687.1 (Capra hircus: 100.0% identity in aln 84.2% length of target) | XP_005894575.1 (Bos mutus: 98.0% identity in aln 84.2% length of target) | XP_006070621.1 (Bubalus bubalis: 98.0% identity in aln 84.2% length of target) | XP_010835543.1 (Bison bison bison: 98.0% identity in aln 84.2% length of target) | XP_006186740.1 (Camelus ferus: 96.0% identity in aln 84.2% length of target)	63	7	11.1	53	6	93.7	germ cell-specific gene 1-like protein	germ cell-specific gene 1-like protein precursor | RecName: Full=Germ cell-specific gene 1-like protein; Short=GSG1-like protein | Germ cell-specific 1-like protein	6	-2,+4	.	SBK1,XPO6,GSG1L,KIAA0556,GTF3C1,IL21R,IL4R	.
ENSOARG00000000868	ENSOARP00000000899	0	.	SLC22A10	solute carrier family 22 member 10	8	.	.	0	0	0	0	0	0	.	.	.	.	.	.	.
ENSOARG00000000870	ENSOARP00000000895	0	.	C2CD4A	C2 calcium dependent domain containing 4A	6	.	XP_005973235.1 (Pantholops hodgsonii: 98.507% identity in aln 44.7% length of target)	5	5	100	3	4	80	C2 calcium-dependent domain-containing protein 4A	.	.	.	.	.	.
ENSOARG00000000879	ENSOARP00000000902	0	.	C2CD4A	C2 calcium dependent domain containing 4A	6	.	XP_013822642.1 (Capra hircus: 96.053% identity in aln 87.4% length of target)	8	8	100	3	4	87.5	C2 calcium-dependent domain-containing protein 4A	.	.	.	.	.	.
ENSOARG00000000882	ENSOARP00000000911	0	.	C2CD4A	C2 calcium dependent domain containing 4A	6	.	XP_013822642.1 (Capra hircus: 96.053% identity in aln 87.4% length of target)	8	8	100	3	4	87.5	C2 calcium-dependent domain-containing protein 4A	.	.	.	.	.	.
ENSOARG00000000886	ENSOARP00000000914	0	.	C2CD4A	C2 calcium dependent domain containing 4A	3	.	XP_013822639.1 (Capra hircus: 94.3% identity in aln 67.4% length of target)	7	7	100	4	5	100	C2 calcium-dependent domain-containing protein 4A	.	.	.	.	.	.
ENSOARG00000000887	ENSOARP00000000915	0	.	RPS6	ribosomal protein S6	8	.	.	0	0	0	0	0	0	.	.	0	0	.	.	.
ENSOARG00000000914	ENSOARP00000000945	0	.	MAFA	MAF bZIP transcription factor A	4	.	.	9	1	11.1	10	1	100	transcription factor MafA	.	0	0	.	.	.
ENSOARG00000000917	ENSOARP00000000949	0	.	ARVCF	armadillo repeat gene deleted in velocardiofacial syndrome	4	.	.	127	3	2.4	47	2	95.3	armadillo repeat protein deleted in velo-cardio-facial syndrome	Armadillo repeat protein deleted in velo-cardio-facial syndrome | Armadillo repeat protein deleted in velo-cardio-facial syndrome-like | Armadillo repeat protein deleted in velo-cardio-facial syndrome isoform 2-like protein | Armadillo repeat protein deleted in velo-cardio-facial syndrome like protein	0	0	.	.	.
ENSOARG00000000924	ENSOARP00000000956	0	.	RBM7	RNA binding motif protein 7	1	.	XP_005689528.1 (Capra hircus: 99.2% identity in aln 100.0% length of target) | NP_001029659.1 (Bos taurus: 98.5% identity in aln 100.0% length of target) | XP_006079296.1 (Bubalus bubalis: 98.9% identity in aln 100.0% length of target) | XP_010828664.1 (Bison bison bison: 98.1% identity in aln 100.0% length of target) | XP_005957442.1 (Pantholops hodgsonii: 98.1% identity in aln 100.0% length of …	6	6	100	5	6	100	RNA-binding protein 7	.	4	0,+4	ENSOARG00000017023/C15H11orf71	RBM7,REXO2,NXPE4,NXPE2,CADM1	ENSOARG00000001643/ENSBTAG00000037657
ENSOARG00000000925	ENSOARP00000000955	0	.	EID1	EP300-interacting inhibitor of differentiation 1	8	.	.	0	0	0	0	0	0	.	.	.	.	.	.	.
ENSOARG00000000941	ENSOARP00000000977	1	ENSOARG00000009807	RNF220	ring finger protein 220	1	.	XP_005894243.1 (Bos mutus: 99.7% identity in aln 100.0% length of target)	46	5	10.9	44	4	87	E3 ubiquitin-protein ligase RNF220	rCG50443, isoform CRA_a | E3 ubiquitin-protein ligase Rnf220 | E3 ubiquitin-protein ligase Rnf220 isoform 2 | E3 ubiquitin-protein ligase RNF220-like | E3 ubiquitin-protein ligase RNF220 isoform 2 | RIKEN cDNA 4931406I20, isoform CRA_b	8	0,+8	.	RNF220,TMEM53,C1orf228,KIF2C,RPS8,BEST4,PLK3,TCTEX1D4,BTBD19	ENSOARG00000001264/PTCH2
ENSOARG00000000954	ENSOARP00000000990	0	.	SLC22A10	solute carrier family 22 member 10	1	.	XP_012001607.1 (Ovis aries musimon: 98.2% identity in aln 92.2% length of target) | XP_005699862.1 (Capra hircus: 96.7% identity in aln 92.2% length of target) | XP_005904924.1 (Bos mutus: 93.1% identity in aln 92.2% length of target) | XP_002699346.1 (Bos taurus: 92.7% identity in aln 92.2% length of target) | XP_006064562.1 (Bubalus bubalis: 92.1% identity in aln 92.2% length of target) | XP_01…	7	7	100	5	6	100	solute carrier family 22 member 10	.	.	.	.	.	.
ENSOARG00000000975	ENSOARP00000001007	10	ENSOARG00000001105, ENSOARG00000004460, ENSOARG00000004995, ENSOARG00000006035, ENSOARG00000006818, ENSOARG00000008467, ENSOARG00000015615, ENSOARG00000018407, ENSOARG00000018456, ENSOARG00000019908	RPS15A	ribosomal protein S15a	1	NP_001010.2 (98.5% identity in aln 100.0% length of target)	XP_011984926.1 (Ovis aries musimon: 96.2% identity in aln 100.0% length of target) | XP_005899584.1 (Bos mutus: 97.7% identity in aln 100.0% length of target) | XP_006049511.1 (Bubalus bubalis: 94.6% identity in aln 100.0% length of target) | XP_005965896.1 (Pantholops hodgsonii: 97.7% identity in aln 100.0% length of target)	104	10	9.6	166	4	84.6	40S ribosomal protein S15A	ADP-ribosylation factor-like protein 6-interacting protein 1 | ribosomal protein S15 | hCG1994130, isoform CRA_b | 40S ribosomal protein S15 | ribosomal protein S15a, isoform CRA_b | mCG50271 | 40S ribosomal protein S15Aa | Chain a, M48s Late-stage Initiation Complex, Purified From Rabbit Reticulocytes Lysates, Displaying Eif2 Ternary Complex And Eif3 I And G Subunits Relocated To The Intersubuni…	0	0	.	.	.
ENSOARG00000000985	ENSOARP00000001019	1	ENSOARG00000014018	PAPSS2	3'-phosphoadenosine 5'-phosphosulfate synthase 2	1	.	XP_010836778.1 (Bison bison bison: 97.8% identity in aln 100.0% length of target)	284	12	4.2	141	7	78.2	bifunctional 3'-phosphoadenosine 5'-phosphosulfate synthase 2	Bifunctional ATP sulfurylase/APS kinase 2 | Bifunctional 3'-phosphoadenosine 5'-phosphosulfate synthetase 2 | bifunctional 3'-phosphoadenosine 5'-phosphosulfate synthase 2-like | PAPSS2 | bifunctional 3-phosphoadenosine 5-phosphosulfate synthase 2 | 3'-phosphoadenosine 5'-phosphosulfate synthase 2 (predicted) | 3'-phosphoadenosine 5'-phosphosulfate synthase 2 alpha | PAPS synthetase-2 | bifunctio…	0	0	.	.	.
ENSOARG00000000997	ENSOARP00000001030	0	.	PMFBP1	polyamine-modulated factor 1-binding protein 1	8	.	.	0	0	0	0	0	0	.	.	0	0	ENSOARG00000001007/ZFHX3	.	ENSOARG00000000987/DHX38
ENSOARG00000001001	ENSOARP00000001047	0	.	SPAG5	sperm associated antigen 5	1	.	XP_013827322.1 (Capra hircus: 99.065% identity in aln 98.8% length of target)XP_013827322.1 (Capra hircus: 99.1% identity in aln 98.8% length of target) | XP_006042252.1 (Bubalus bubalis: 96.6% identity in aln 100.0% length of target)	2	2	100	2	2	100	sperm-associated antigen 5	.	15	0,+15	ENSOARG00000001391/ENSBTAG00000011984	SPAG5,ALDOC,PIGS,UNC119,FOXN1,SLC13A2,SLC46A1,SARM1,VTN,SEBOX,TMEM199,POLDIP2,TNFAIP1,IFT20,TMEM97,NLK	.
ENSOARG00000001009	ENSOARP00000001043	0	.	HAUS3	HAUS augmin-like complex subunit 3	8	.	.	0	0	0	0	0	0	.	.	0	0	.	.	ENSOARG00000000951/POLN
ENSOARG00000001018	ENSOARP00000001052	0	.	C1orf95	protein stum homolog	8	.	.	0	0	0	0	0	0	.	.	.	.	.	.	.
ENSOARG00000001025	ENSOARP00000001065	0	.	TOLLIP	toll interacting protein	8	.	.	0	0	0	0	0	0	.	.	0	0	.	.	ENSOARG00000001041/B4GALNT4
ENSOARG00000001027	ENSOARP00000001066	1	ENSOARG00000001608	TIMM8A	translocase of inner mitochondrial membrane 8 homolog A (yeast)	1	.	NP_001029652.1 (Bos taurus: 95.9% identity in aln 100.0% length of target) | XP_006210330.1 (Vicugna pacos: 94.8% identity in aln 100.0% length of target)	41	2	4.9	74	2	80.5	mitochondrial import inner membrane translocase subunit Tim8 A	Deafness dystonia protein 1 | mitochondrial import inner membrane translocase subunit Tim8 A-like | tyrosine-protein kinase BTK | Translocase of inner mitochondrial membrane 8 homolog A (yeast) | mitochondrial import inner membrane translocase subunit Tim8 A isoform 1 | TIMM8A	0	0	.	.	.
ENSOARG00000001043	ENSOARP00000001077	0	.	GSTO1	glutathione S-transferase omega 1	1	.	XP_011974908.1 (Ovis aries musimon: 96.3% identity in aln 100.0% length of target) | XP_005698499.1 (Capra hircus: 96.3% identity in aln 100.0% length of target) | XP_006050156.1 (Bubalus bubalis: 95.4% identity in aln 100.0% length of target) | XP_010857698.1 (Bison bison bison: 95.4% identity in aln 100.0% length of target) | XP_005961598.1 (Pantholops hodgsonii: 95.4% identity in aln 100.0% le…	8	8	100	5	6	75	glutathione S-transferase omega-1	glutathione-S-transferase omega 1	.	.	.	.	.
ENSOARG00000001047	ENSOARP00000001086	0	.	ATP6V0E2	ATPase H+ transporting V0 subunit e2	1	.	NP_001091043.1 (Bos taurus: 100.0% identity in aln 100.0% length of target)	60	3	5	83	3	91.7	V-type proton ATPase subunit e 2	zinc finger protein 862 | Zinc finger protein 862 | V-type proton ATPase subunit e 2 isoform 3 | V-type proton ATPase subunit e 2 isoform 1 | RecName: Full=V-type proton ATPase subunit e 2; Short=V-ATPase subunit e 2; AltName: Full=Lysosomal 9 kDa H(+)-transporting ATPase V0 subunit e2; AltName: Full=Vacuolar proton pump subunit e 2	.	.	.	.	.
ENSOARG00000001059	ENSOARP00000001097	1	ENSOARG00000005800	CKB	creatine kinase B	1	.	XP_006175708.2 (Camelus ferus: 96.9% identity in aln 96.4% length of target)	242	6	2.5	140	6	76	creatine kinase B-type	Creatine kinase B-type | creatine kinase-B | creatine kinase B-type-like | creatine kinase | creatine kinase, brain, isoform CRA_a | CKB | mCG1689, isoform CRA_b | creatine kinase, brain | Ckb protein | brain creatine kinase | Chain A, Crystal Structure Of Chicken Brain-Type Creatine Kinase At 1.41 Angstrom Resolution | mCG114530 | creatine kinase (EC 2.7.3.2) chain Bb - chicken | Chain A, Crysta…	0	0	.	.	.
ENSOARG00000001066	ENSOARP00000001111	0	.	CCZ1	CCZ1 homolog, vacuolar protein trafficking and biogenesis associated	1	.	XP_006210432.1 (Vicugna pacos: 99.3% identity in aln 100.0% length of target)	12	1	8.3	12	1	83.3	CCZ1 homolog, vacuolar protein trafficking and biogenesis associated	Vacuolar fusion protein CCZ1-like protein | Vacuolar fusion protein CCZ1 like protein	.	.	.	.	.
ENSOARG00000001079	ENSOARP00000001115	1	.	RPS13	RPS13	1	NP_001008.1 (92.7% identity in aln 100.0% length of target)	XP_011966911.1 (Ovis aries musimon: 99.3% identity in aln 100.0% length of target) | XP_006075803.1 (Bubalus bubalis: 92.1% identity in aln 100.0% length of target) | XP_006180397.1 (Camelus ferus: 92.1% identity in aln 100.0% length of target)	91	6	6.6	170	3	96.7	40S ribosomal protein S13	Phosphatidylinositol-4-phosphate 3-kinase C2 domain-containing subunit alpha | ribosomal protein S13 L homeolog | Chain Z, M48s Late-stage Initiation Complex, Purified From Rabbit Reticulocytes Lysates, Displaying Eif2 Ternary Complex And Eif3 I And G Subunits Relocated To The Intersubunit Face	0	0	.	.	.
ENSOARG00000001105	ENSOARP00000001146	10	ENSOARG00000000975, ENSOARG00000004460, ENSOARG00000004995, ENSOARG00000006035, ENSOARG00000006818, ENSOARG00000008467, ENSOARG00000015615, ENSOARG00000018407, ENSOARG00000018456, ENSOARG00000019908	RPS15A	ribosomal protein S15a	1	NP_001010.2 (96.9% identity in aln 100.0% length of target)	XP_011984926.1 (Ovis aries musimon: 93.8% identity in aln 100.0% length of target) | XP_005899584.1 (Bos mutus: 96.2% identity in aln 100.0% length of target) | XP_006049511.1 (Bubalus bubalis: 94.6% identity in aln 100.0% length of target) | XP_005965896.1 (Pantholops hodgsonii: 96.2% identity in aln 100.0% length of target)	91	10	11	159	4	87.9	40S ribosomal protein S15A	ADP-ribosylation factor-like protein 6-interacting protein 1 | hCG1994130, isoform CRA_b | 40S ribosomal protein S15 | ribosomal protein S15a, isoform CRA_b | mCG50271 | Chain a, M48s Late-stage Initiation Complex, Purified From Rabbit Reticulocytes Lysates, Displaying Eif2 Ternary Complex And Eif3 I And G Subunits Relocated To The Intersubunit Face | rCG40707, isoform CRA_b | 30S ribosomal prote…	0	0	.	.	.
ENSOARG00000001119	ENSOARP00000001158	0	.	DTD1	D-tyrosyl-tRNA deacylase 1	8	.	.	0	0	0	0	0	0	.	.	2	0,+2	ENSOARG00000001214/ENSBTAG00000012276	DTD1,SCP2D1,SLC24A3	ENSOARG00000001614/ENSBTAG00000032893
ENSOARG00000001138	ENSOARP00000001192	0	.	HERC6	probable E3 ubiquitin-protein ligase HERC6	8	.	.	0	0	0	0	0	0	.	.	7	-6,+1	ENSOARG00000003075/LAP3	IBSP,MEPE,SPP1,PKD2,ABCG2,PPM1K,HERC6,HERC5	.
ENSOARG00000001147	ENSOARP00000001189	0	.	FBXW5	F-box and WD repeat domain containing 5	4	.	.	115	9	7.8	71	6	99.1	F-box/WD repeat-containing protein 5	F-box and WD repeat domain containing 5	0	0	ENSOARG00000018637/C8G	.	.
ENSOARG00000001153	ENSOARP00000001194	0	.	GRM8	glutamate metabotropic receptor 8	3	XP_011514410.1 (97.4% identity in aln 56.2% length of target)	.	255	7	2.7	143	6	76.9	metabotropic glutamate receptor 8	metabotropic glutamate receptor 8-like | glutamate receptor, metabotropic 8 precursor (predicted) | glutamate receptor, metabotropic 8, isoform CRA_c | glutamate receptor, metabotropic 8 isoform b precursor (predicted), 3 prime | metabotropic glutamate receptor 8 precursor | GRM8 | glutamate receptor, metabotropic 8 splice variant b | metabotropic glutamate receptor 8 isoform b precursor | metabo…	.	.	.	.	.
ENSOARG00000001206	ENSOARP00000001247	1	ENSOARG00000020236	BET1	Bet1 golgi vesicular membrane trafficking protein	1	.	NP_001092627.1 (Bos taurus: 98.2% identity in aln 94.9% length of target) | XP_006207692.1 (Vicugna pacos: 95.5% identity in aln 94.9% length of target)	62	3	4.8	70	3	91.9	BET1 homolog	BET1-like protein | BET1 homolog isoform 1 | BET1-like | BET1 homolog (S. cerevisiae), isoform CRA_a	8	-8,0	.	PON2,PON3,PON1,PPP1R9A,PEG10,SGCE,CASD1,COL1A2,BET1	.
ENSOARG00000001286	ENSOARP00000001332	0	.	PTGES2	prostaglandin E synthase 2	4	.	.	18	6	33.3	12	5	94.4	prostaglandin E synthase 2	Prostaglandin E synthase 2	0	0	.	.	.
ENSOARG00000001315	ENSOARP00000001393	0	.	SLC22A10	solute carrier family 22 member 10	6	.	XP_012001604.1 (Ovis aries musimon: 99.625% identity in aln 97.6% length of target)	1	1	100	0	1	100	solute carrier family 22 member 10	.	.	.	.	.	.
ENSOARG00000001382	ENSOARP00000001439	0	.	RPL9	ribosomal protein L9	6	.	NP_001019640.2 (Bos taurus: 100.000% identity in aln 100.0% length of target)	131	13	9.9	148	5	72.5	60S ribosomal protein L9	.	.	.	.	.	.
ENSOARG00000001406	ENSOARP00000001472	0	.	TOP1	topoisomerase (DNA) I	5	.	.	55	0	0	41	0	96.4	DNA topoisomerase 1	DNA topoisomerase I	1	0,+1	ENSOARG00000001355/MAFB	TOP1,PLCG1	ENSOARG00000002038/ZHX3
ENSOARG00000001419	ENSOARP00000001484	0	.	TPX2	TPX2, microtubule nucleation factor	1	.	XP_005887973.1 (Bos mutus: 98.0% identity in aln 100.0% length of target) | XP_005214656.1 (Bos taurus: 98.0% identity in aln 100.0% length of target) | XP_006064496.1 (Bubalus bubalis: 98.4% identity in aln 100.0% length of target) | XP_005960853.1 (Pantholops hodgsonii: 99.6% identity in aln 100.0% length of target)	10	5	50	9	4	90	targeting protein for Xklp2	targeting protein for Xklp2 isoform 1	2	0,+2	ENSOARG00000001262/BCL2L1	TPX2,MYLK2,FOXS1	ENSOARG00000001815/ENSBTAG00000031214
ENSOARG00000001425	ENSOARP00000001483	1	ENSOARG00000004853	MEA1	male-enhanced antigen 1	1	.	XP_011969301.1 (Ovis aries musimon: 91.4% identity in aln 100.0% length of target) | XP_005696376.1 (Capra hircus: 90.8% identity in aln 91.1% length of target) | XP_005900181.1 (Bos mutus: 90.2% identity in aln 100.0% length of target) | XP_006069289.1 (Bubalus bubalis: 90.8% identity in aln 95.6% length of target)	8	7	87.5	4	5	75	male-enhanced antigen 1	Male-enhanced antigen 1 | male-enhanced antigen 1-like	.	.	.	.	.
ENSOARG00000001462	ENSOARP00000001524	0	.	SERGEF	secretion regulating guanine nucleotide exchange factor	8	.	.	0	0	0	0	0	0	.	.	11	-11,0	ENSOARG00000017078/SORL1	UBASH3B,CRTAM,C11orf63,BSX,HSPA8,CLMP,GRAMD1B,SCN3B,ZNF202,SAAL1,TPH1,SERGEF	.
ENSOARG00000001463	ENSOARP00000001527	0	.	BMI1	BMI1 proto-oncogene, polycomb ring finger	1	NP_005171.4 (99.1% identity in aln 100.0% length of target)	NP_001033161.1 (Bos taurus: 100.0% identity in aln 100.0% length of target) | XP_006080016.1 (Bubalus bubalis: 99.7% identity in aln 100.0% length of target) | XP_006193043.2 (Camelus ferus: 99.4% identity in aln 95.6% length of target) | XP_006208927.1 (Vicugna pacos: 99.4% identity in aln 100.0% length of target)	88	5	5.7	98	4	90.9	polycomb complex protein BMI-1	B lymphoma Mo-MLV insertion region (mouse) | COMMD3-BMI1 read-through protein | COMMD3 | COMM domain-containing protein 3-like isoform 1 | BMI1 | B lymphoma Mo-MLV insertion region | BMI1 polycomb ring finger oncogene	.	.	.	.	.
ENSOARG00000001465	ENSOARP00000001521	1	ENSOARG00000000070	GIMAP7	GTPase, IMAP family member 7	1	.	XP_012028277.1 (Ovis aries musimon: 94.697% identity in aln 90.4% length of target)XP_012028277.1 (Ovis aries musimon: 94.7% identity in aln 90.4% length of target) | XP_013832259.1 (Capra hircus: 91.7% identity in aln 90.4% length of target) | XP_005960722.1 (Pantholops hodgsonii: 92.0% identity in aln 90.4% length of target)	3	3	100	2	3	100	GTPase IMAP family member 7-like	.	.	.	.	.	.
ENSOARG00000001467	ENSOARP00000001526	1	ENSOARG00000001597	OR5K1	olfactory receptor family 5 subfamily K member 1	1	.	XP_014963282.1 (Ovis aries musimon: 99.7% identity in aln 99.0% length of target) | XP_005674937.1 (Capra hircus: 99.7% identity in aln 99.0% length of target) | XP_005905482.1 (Bos mutus: 97.4% identity in aln 99.0% length of target) | XP_006074631.1 (Bubalus bubalis: 97.4% identity in aln 99.0% length of target) | XP_010846696.1 (Bison bison bison: 97.0% identity in aln 99.0% length of target) …	7	6	85.7	5	6	100	olfactory receptor 5K1	.	.	.	.	.	.
ENSOARG00000001476	ENSOARP00000001539	0	.	ETFA	electron transfer flavoprotein alpha subunit	8	.	.	0	0	0	0	0	0	.	.	12	-11,+1	.	SNX33,CSPG4,ODF3L1,LINGO1,HMG20A,PEAK1,TSPAN3,PSTPIP1,RCN2,SCAPER,ISL2,ETFA,TMEM266	ENSOARG00000001427/FBXO22
ENSOARG00000001501	ENSOARP00000001560	1	ENSOARG00000017661	OR5H2	olfactory receptor family 5 subfamily H member 2	1	.	XP_012043775.1 (Ovis aries: 100.000% identity in aln 100.0% length of target)XP_005905480.1 (Bos mutus: 94.2% identity in aln 100.0% length of target) | XP_006074621.1 (Bubalus bubalis: 95.5% identity in aln 100.0% length of target)	4	3	75	2	3	100	olfactory receptor 5H2	.	.	.	.	.	.
ENSOARG00000001503	ENSOARP00000001561	1	.	OR2Z1	OR2Z1	1	.	XP_011984305.2 (Ovis aries musimon: 99.4% identity in aln 92.8% length of target) | XP_005682270.1 (Capra hircus: 99.1% identity in aln 92.8% length of target) | XP_005901539.1 (Bos mutus: 95.1% identity in aln 96.2% length of target) | XP_002688631.1 (Bos taurus: 95.7% identity in aln 96.2% length of target) | XP_010843971.1 (Bison bison bison: 95.4% identity in aln 96.2% length of target) | XP_…	6	6	100	4	5	100	olfactory receptor 2Z1	.	0	0	ENSOARG00000000973/ACTL9	.	ENSOARG00000001493/ENSBTAG00000002284
ENSOARG00000001517	ENSOARP00000001577	0	.	SCARB2	scavenger receptor class B member 2	8	.	.	0	0	0	0	0	0	.	.	0	0	ENSOARG00000001549/ENSBTAG00000004921	.	.
ENSOARG00000001524	ENSOARP00000001588	0	.	ZNF160	zinc finger protein 160-like	8	.	.	0	0	0	0	0	0	.	.	.	.	.	.	.
ENSOARG00000001540	ENSOARP00000001605	0	.	SH3BGRL3	SH3 domain binding glutamate rich protein like 3	1	.	XP_014418781.1 (Camelus ferus: 100.0% identity in aln 94.0% length of target) | XP_005977465.1 (Pantholops hodgsonii: 100.0% identity in aln 94.0% length of target)	67	2	3	120	2	88.1	SH3 domain-binding glutamic acid-rich-like protein 3	SH3 domain-binding glutamic acid-rich-like 3 | SH3 domain binding glutamic acid-rich protein like 3, isoform CRA_a | SH3 domain binding glutamic acid-rich protein like protein | Chain A, Solution Structure Of The Sh3 Domain Binding Glutamic Acid- Rich Protein Like 3 | unknown | Chain A, Nmr Structure And Regulated Expression In Apl Cell Of Human Sh3bgrl3	0	0	.	.	.
ENSOARG00000001578	ENSOARP00000001651	0	.	GUSB	glucuronidase beta	4	.	.	43	8	18.6	21	5	83.7	beta-glucuronidase	beta-glucuronidase precursor | beta-glucuronidase-like | mutant beta-glucuronidase	.	.	.	.	.
ENSOARG00000001597	ENSOARP00000001672	1	ENSOARG00000001467	OR5K1	olfactory receptor family 5 subfamily K member 1	1	.	XP_011995119.1 (Ovis aries musimon: 99.4% identity in aln 99.7% length of target) | XP_005674881.1 (Capra hircus: 99.1% identity in aln 99.7% length of target) | XP_005896904.1 (Bos mutus: 95.0% identity in aln 99.7% length of target) | XP_006043456.1 (Bubalus bubalis: 96.0% identity in aln 99.7% length of target) | XP_006181138.1 (Camelus ferus: 91.3% identity in aln 99.7% length of target) | XP…	15	7	46.7	12	7	93.3	olfactory receptor 5K1	Olfactory receptor 5K1	5	-1,+4	ENSOARG00000001638/ENSBTAG00000019253	BTK,TIMM8A,TAF7L,DRP2,CENPI,TMEM35A	.
ENSOARG00000001608	ENSOARP00000001687	1	ENSOARG00000001027	TIMM8A	translocase of inner mitochondrial membrane 8 homolog A (yeast)	1	.	NP_001029652.1 (Bos taurus: 100.0% identity in aln 100.0% length of target) | XP_006210330.1 (Vicugna pacos: 99.0% identity in aln 100.0% length of target)	53	2	3.8	87	2	79.2	mitochondrial import inner membrane translocase subunit Tim8 A	mitochondrial import inner membrane translocase subunit Tim8 A-like | Deafness dystonia protein 1 | tyrosine-protein kinase BTK | Translocase of inner mitochondrial membrane 8 homolog A (yeast) | mitochondrial import inner membrane translocase subunit Tim8 A isoform 1 | Mitochondrial import inner membrane translocase subunit Tim8 A | TIMM8A	.	.	.	.	.
ENSOARG00000001610	ENSOARP00000001692	0	.	CRTC2	CREB-regulated transcription coactivator 2	8	.	.	0	0	0	0	0	0	.	.	2	-1,+1	ENSOARG00000001482/ZNF200	MEFV,ZNF263,TIGD7	ENSOARG00000001671/ENSBTAG00000040381
ENSOARG00000001622	ENSOARP00000001701	0	.	ZNF263	zinc finger protein 263	3	.	XP_005697521.1 (Capra hircus: 100.0% identity in aln 55.9% length of target) | XP_005911323.1 (Bos mutus: 99.2% identity in aln 55.9% length of target) | XP_010817352.1 (Bos taurus: 99.2% identity in aln 55.9% length of target) | XP_010838678.1 (Bison bison bison: 99.0% identity in aln 55.9% length of target) | XP_006179749.1 (Camelus ferus: 90.1% identity in aln 56.0% length of target)	12	6	50	8	4	100	zinc finger protein 263	.	.	.	.	.	.
ENSOARG00000001623	ENSOARP00000001702	2	ENSOARG00000012030, ENSOARG00000012116	MOGAT2	monoacylglycerol O-acyltransferase 2	1	.	XP_014946993.1 (Ovis aries musimon: 93.380% identity in aln 97.6% length of target)XP_014946993.1 (Ovis aries musimon: 93.4% identity in aln 97.6% length of target)	1	1	100	0	1	100	2-acylglycerol O-acyltransferase 2	.	0	0	.	.	.
ENSOARG00000001635	ENSOARP00000001718	1	ENSOARG00000001640	DHH	desert hedgehog	1	XP_016874870.1 (98.6% identity in aln 99.6% length of target)	.	63	2	3.2	70	2	88.9	desert hedgehog protein	desert hedgehog protein preproprotein | Desert hedgehog protein | Protein LMBR1L | desert hedgehog protein precursor | mutant desert hedgehog precursor	0	0	.	.	.
ENSOARG00000001640	ENSOARP00000001737	1	ENSOARG00000001635	DHH	desert hedgehog	1	XP_016874870.1 (98.6% identity in aln 99.6% length of target)	.	63	2	3.2	70	2	88.9	desert hedgehog protein	desert hedgehog protein preproprotein | Desert hedgehog protein | Protein LMBR1L | desert hedgehog protein precursor | mutant desert hedgehog precursor	.	.	.	.	.
ENSOARG00000001645	ENSOARP00000001726	1	ENSOARG00000001589	GIMAP5	GTPase, IMAP family member 5	1	.	XP_012027999.2 (Ovis aries musimon: 95.2% identity in aln 91.6% length of target) | XP_005679709.1 (Capra hircus: 93.8% identity in aln 100.0% length of target) | XP_006049151.1 (Bubalus bubalis: 91.2% identity in aln 100.0% length of target) | XP_010855567.1 (Bison bison bison: 90.9% identity in aln 100.0% length of target) | XP_005960715.1 (Pantholops hodgsonii: 94.1% identity in aln 100.0% len…	9	9	100	4	5	100	GTPase IMAP family member 5-like	.	4	-1,+3	.	LY6D,LYNX1,LYPD2,SLURP1,THEM6	ENSOARG00000001915/PSCA
ENSOARG00000001649	ENSOARP00000001732	0	.	LYNX1	ly-6/neurotoxin-like protein 1	8	.	.	0	0	0	0	0	0	.	.	4	-4,0	.	ARAP3,PCDH1,KIAA0141,PCDH12,RNF14	ENSOARG00000001722/GNPDA1
ENSOARG00000001652	ENSOARP00000001735	1	.	RNF14	RNF14	1	.	XP_014961171.1 (Ovis aries musimon: 99.2% identity in aln 100.0% length of target) | XP_005683129.1 (Capra hircus: 99.6% identity in aln 100.0% length of target) | NP_001075009.1 (Bos taurus: 99.8% identity in aln 100.0% length of target) | XP_006184426.1 (Camelus ferus: 97.9% identity in aln 100.0% length of target) | XP_006204575.1 (Vicugna pacos: 97.9% identity in aln 100.0% length of target)	65	5	7.7	64	5	93.8	E3 ubiquitin-protein ligase RNF14	E3 ubiquitin-protein ligase RNF14 isoform 1 | E3 ubiquitin-protein ligase RNF14-like	1	0,+1	.	SERGEF,KCNC1	ENSOARG00000025174/MYOD1
ENSOARG00000001673	ENSOARP00000001757	0	.	SERGEF	secretion regulating guanine nucleotide exchange factor	4	.	XP_011992332.1 (Ovis aries musimon: 94.958% identity in aln 25.6% length of target)	3	3	100	1	2	100	secretion-regulating guanine nucleotide exchange factor	.	.	.	.	.	.
ENSOARG00000001675	ENSOARP00000001765	0	.	LTV1	LTV1 ribosome biogenesis factor	1	.	XP_011976954.1 (Ovis aries musimon: 99.789% identity in aln 100.0% length of target)XP_011976954.1 (Ovis aries musimon: 99.8% identity in aln 100.0% length of target) | XP_005684921.1 (Capra hircus: 99.6% identity in aln 100.0% length of target) | XP_005974990.1 (Pantholops hodgsonii: 98.7% identity in aln 100.0% length of target)	3	3	100	2	3	100	protein LTV1 homolog	.	0	0	.	.	.
ENSOARG00000001681	ENSOARP00000001767	0	.	SYT2	synaptotagmin 2	4	.	.	249	9	3.6	152	8	77.5	synaptotagmin-2	synaptotagmin-2-like | SYT2 protein | synaptotagmin-1 | synaptotagmin-2-like protein | mKIAA4194 protein | RecName: Full=Synaptotagmin-2; AltName: Full=Inositol polyphosphate-binding protein; Short=IP4-binding protein; Short=IP4BP; AltName: Full=Synaptotagmin II; Short=SytII	.	.	.	.	.
ENSOARG00000001737	ENSOARP00000001822	0	.	SLC22A10	solute carrier family 22 member 10	6	.	XP_004019673.1 (Ovis aries: 100.000% identity in aln 100.0% length of target)	3	3	100	2	3	100	solute carrier family 22 member 10	.	0	0	.	.	.
ENSOARG00000001776	ENSOARP00000001864	0	.	NDUFB11	NADH:ubiquinone oxidoreductase subunit B11	8	.	.	0	0	0	0	0	0	.	.	.	.	.	.	.
ENSOARG00000001795	ENSOARP00000001883	0	.	MORF4L1	mortality factor 4 like 1	8	.	.	0	0	0	0	0	0	.	.	2	-2,0	.	TMEM176B,TMEM176A,AOC1	ENSOARG00000001807/KCNH2
ENSOARG00000001799	ENSOARP00000001888	0	.	AOC1	amine oxidase, copper containing 1	4	.	.	7	7	100	5	6	85.7	amine oxidase, copper containing 1	amiloride-sensitive amine oxidase precursor	4	-3,+1	ENSOARG00000001661/ENSBTAG00000017029	MMACHC,PRDX1,AKR1A1,NASP,CCDC17	.
ENSOARG00000001820	ENSOARP00000001915	0	.	NASP	nuclear autoantigenic sperm protein	8	.	.	0	0	0	0	0	0	.	.	3	-3,0	.	FOS,JDP2,BATF,FLVCR2	ENSOARG00000001852/STARD4
ENSOARG00000001834	ENSOARP00000001928	0	.	FLVCR2	feline leukemia virus subgroup C cellular receptor family member 2	2	.	XP_014414574.1 (Camelus ferus: 94.4% identity in aln 85.4% length of target)	12	3	25	11	3	83.3	feline leukemia virus subgroup C receptor-related protein 2	feline leukemia virus subgroup C receptor-related protein 2-like	.	.	.	.	.
ENSOARG00000001858	ENSOARP00000001952	0	.	ZC3H11A	zinc finger CCCH-type containing 11A	1	.	XP_005690436.1 (Capra hircus: 99.3% identity in aln 100.0% length of target) | XP_005891954.1 (Bos mutus: 97.1% identity in aln 100.0% length of target) | NP_001093417.2 (Bos taurus: 97.2% identity in aln 100.0% length of target) | XP_006072454.1 (Bubalus bubalis: 96.9% identity in aln 100.0% length of target) | XP_010852440.1 (Bison bison bison: 97.4% identity in aln 100.0% length of target)	6	6	100	4	5	100	zinc finger CCCH domain-containing protein 11A	.	0	0	.	.	.
ENSOARG00000001876	ENSOARP00000001967	1	ENSOARG00000019740	APEX1	apurinic/apyrimidinic endodeoxyribonuclease 1	1	.	XP_012025341.1 (Ovis aries musimon: 94.8% identity in aln 96.9% length of target) | XP_005685462.1 (Capra hircus: 95.1% identity in aln 96.9% length of target) | NP_788782.2 (Bos taurus: 95.5% identity in aln 96.9% length of target) | XP_006191288.1 (Camelus ferus: 91.6% identity in aln 96.9% length of target) | XP_005956106.1 (Pantholops hodgsonii: 95.1% identity in aln 96.9% length of target)	34	5	14.7	30	5	91.2	DNA-(apurinic or apyrimidinic site) lyase	RecName: Full=DNA-(apurinic or apyrimidinic site) lyase; AltName: Full=APEX nuclease; Short=APEN; AltName: Full=Apurinic-apyrimidinic endonuclease 1; Short=AP endonuclease 1; AltName: Full=REF-1; AltName: Full=Redox factor-1; Contains: RecName: Full=DNA-(apurinic or apyrimidinic site) lyase, mitochondrial | APEX1 | DNA-(apurinic or apyrimidinic site) lyase-like protein	0	0	.	.	.
ENSOARG00000001877	ENSOARP00000001966	0	.	CUL7	cullin 7	4	.	.	28	8	28.6	18	7	89.3	cullin-7	cullin-9-like | cullin-7-like	0	0	.	.	.
ENSOARG00000001879	ENSOARP00000001968	0	.	RTTN	rotatin	4	.	.	98	17	17.3	37	8	88.8	rotatin	rotatin-like | Rotatin | RTTN protein | rotatin, isoform CRA_a | rotatin, isoform CRA_d | rotatin, isoform CRA_c | rotatin, isoform CRA_b | rotatin isoform 1 | rotatin, isoform CRA_f	.	.	.	.	.
ENSOARG00000001901	ENSOARP00000001995	0	.	TECPR1	tectonin beta-propeller repeat containing 1	4	.	.	11	10	90.9	3	4	100	tectonin beta-propeller repeat-containing protein 1	.	9	-3,+6	ENSOARG00000001175/ENSBTAG00000007914	ZNF800,GCC1,ARF5,FSCN3,PAX4,LRRC4,SND1,LEP,RBM28,PRRT4	ENSOARG00000002724/ENSBTAG00000031866
ENSOARG00000001904	ENSOARP00000001999	1	ENSOARG00000002383	FSCN3	fascin actin-bundling protein 3	1	.	XP_005679487.1 (Capra hircus: 99.8% identity in aln 100.0% length of target) | XP_014333029.1 (Bos mutus: 97.8% identity in aln 100.0% length of target) | XP_015326148.1 (Bos taurus: 97.4% identity in aln 100.0% length of target) | XP_006069777.1 (Bubalus bubalis: 97.4% identity in aln 100.0% length of target) | XP_010830023.1 (Bison bison bison: 97.4% identity in aln 100.0% length of target) | X…	15	9	60	12	8	100	fascin-3	.	0	0	ENSOARG00000001977/ACSL3	.	.
ENSOARG00000001905	ENSOARP00000002000	0	.	RPS6	ribosomal protein S6	8	.	.	0	0	0	0	0	0	.	.	2	0,+2	.	PPM1L,B3GALNT1,NMD3	.
ENSOARG00000001927	ENSOARP00000002022	0	.	PPM1L	protein phosphatase, Mg2+/Mn2+ dependent 1L	7	.	.	155	7	4.5	158	4	74.8	protein phosphatase 1L	.	0	0	.	.	ENSOARG00000001950/LRRC26
ENSOARG00000001943	ENSOARP00000002043	0	.	GRIN1	glutamate ionotropic receptor NMDA type subunit 1	4	.	.	380	13	3.4	75	3	85	glutamate receptor ionotropic, NMDA 1	Glutamate [NMDA] receptor subunit zeta-1 | glutamate receptor ionotropic, NMDA 1-like | glutamate receptor ionotropic, NMDA 1 precursor | N-methyl-D-aspartate receptor 1 | NMDAR1 subunit isoform 4b | glutamate receptor ionotropic, NMDA 1 isoform 4b precursor | glutamate receptor ionotropic, NMDA 1 isoform 1 precursor | NMDA receptor 1 | glutamate receptor ionotropic, NMDA 1 isoform C | glutamate …	0	0	ENSOARG00000001950/RXRA	.	ENSOARG00000017600/LRRC26
ENSOARG00000001953	ENSOARP00000002053	0	.	GRIN1	glutamate ionotropic receptor NMDA type subunit 1	8	.	.	0	0	0	0	0	0	.	.	.	.	.	.	.
ENSOARG00000002001	ENSOARP00000002104	0	.	GP6	glycoprotein VI platelet	1	.	XP_012018988.1 (Ovis aries musimon: 99.7% identity in aln 100.0% length of target) | XP_005693034.1 (Capra hircus: 98.2% identity in aln 100.0% length of target) | XP_005903167.1 (Bos mutus: 93.2% identity in aln 100.0% length of target) | XP_006064050.1 (Bubalus bubalis: 93.5% identity in aln 100.0% length of target) | XP_010856494.1 (Bison bison bison: 93.5% identity in aln 100.0% length of tar…	6	6	100	5	6	100	platelet glycoprotein VI	.	.	.	.	.	.
ENSOARG00000002014	ENSOARP00000002122	0	.	GPBP1L1	GC-rich promoter binding protein 1 like 1	1	NP_067652.1 (93.5% identity in aln 100.0% length of target)	XP_011987114.1 (Ovis aries musimon: 98.7% identity in aln 100.0% length of target) | XP_005678579.1 (Capra hircus: 98.7% identity in aln 100.0% length of target) | XP_005894272.1 (Bos mutus: 98.3% identity in aln 100.0% length of target) | NP_001192504.1 (Bos taurus: 98.1% identity in aln 100.0% length of target) | XP_006052608.1 (Bubalus bubalis: 98.3% identity in aln 100.0% length of target) | …	59	6	10.2	52	5	96.6	vasculin-like protein 1	coiled-coil domain-containing protein 17 | Vasculin-like protein 1	.	.	.	.	.
ENSOARG00000002025	ENSOARP00000002129	0	.	GPBP1L1	GC-rich promoter binding protein 1 like 1	8	.	.	0	0	0	0	0	0	.	.	0	0	ENSOARG00000001999/NMU	.	.
ENSOARG00000002031	ENSOARP00000002137	1	.	EXOC1	EXOC1	1	.	XP_014408423.1 (Camelus ferus: 98.8% identity in aln 100.0% length of target)	34	1	2.9	52	1	88.2	exocyst complex component 1-like	exocyst complex component 1 | hCG2040572 | Predicted gene, EG639545	0	0	.	.	.
ENSOARG00000002032	ENSOARP00000002136	0	.	AGRN	agrin	4	.	XP_011993964.1 (Ovis aries musimon: 99.801% identity in aln 24.6% length of target)	10	10	100	1	2	100	agrin	.	0	0	.	.	.
ENSOARG00000002041	ENSOARP00000002148	0	.	RCN3	reticulocalbin 3	3	.	XP_012013182.1 (Ovis aries musimon: 99.0% identity in aln 63.1% length of target) | XP_005905057.1 (Bos mutus: 98.6% identity in aln 63.1% length of target) | XP_006080157.1 (Bubalus bubalis: 98.6% identity in aln 63.1% length of target) | XP_006173856.1 (Camelus ferus: 95.7% identity in aln 63.1% length of target) | XP_005955453.1 (Pantholops hodgsonii: 98.1% identity in aln 63.1% length of targ…	80	6	7.5	67	5	87.5	reticulocalbin-3	reticulocalbin-3 precursor | Rcn3 protein | reticulocalbin 3, EF-hand calcium binding domain, isoform CRA_a | Reticulocalbin 3, EF-hand calcium binding domain | reticulocabin precursor | reticulocalbin 3, EF-hand calcium binding domain, isoform CRA_b	.	.	.	.	.
ENSOARG00000002059	ENSOARP00000002164	0	.	SLC22A9	solute carrier family 22 member 9-like	8	.	.	0	0	0	0	0	0	.	.	.	.	.	.	.
ENSOARG00000002083	ENSOARP00000002192	0	.	ZNF160	zinc finger protein 160-like	8	.	.	0	0	0	0	0	0	.	.	0	0	ENSOARG00000002068/ENSBTAG00000036321	.	.
ENSOARG00000002103	ENSOARP00000002211	1	.	PRAME	PRAME	1	.	XP_005963950.1 (Pantholops hodgsonii: 97.859% identity in aln 100.0% length of target)XP_005963950.1 (Pantholops hodgsonii: 97.9% identity in aln 100.0% length of target)	1	1	100	1	1	100	melanoma antigen preferentially expressed in tumors	.	.	.	.	.	.
ENSOARG00000002126	ENSOARP00000002245	0	.	SLC2A5	solute carrier family 2, facilitated glucose transporter member 5	8	.	.	0	0	0	0	0	0	.	.	.	.	.	.	.
ENSOARG00000002134	ENSOARP00000002247	0	.	SATL1	spermidine/spermine N1-acetyl transferase-like 1	2	.	XP_005700681.1 (Capra hircus: 96.9% identity in aln 75.3% length of target) | XP_006065089.1 (Bubalus bubalis: 91.7% identity in aln 75.4% length of target)	17	4	23.5	14	4	88.2	spermidine/spermine N(1)-acetyltransferase-like protein 1	spermidine/spermine N(1)-acetyltransferase-like protein 1-like | Spermidine/spermine N(1)-acetyltransferase-like protein 1	.	.	.	.	.
ENSOARG00000002136	ENSOARP00000002249	0	.	C10orf53	chromosome 10 open reading frame 53	1	.	XP_005699409.1 (Capra hircus: 98.9% identity in aln 100.0% length of target) | NP_001161475.1 (Bos taurus: 94.6% identity in aln 100.0% length of target) | XP_006065737.1 (Bubalus bubalis: 94.6% identity in aln 100.0% length of target) | XP_005961001.1 (Pantholops hodgsonii: 97.8% identity in aln 100.0% length of target)	5	5	100	5	5	100	UPF0728 protein C10orf53 homolog	.	2	-1,+1	ENSOARG00000015103/ENSBTAG00000038395	IQCJ,SCHIP1,IL12A	ENSOARG00000002161/C3orf80
ENSOARG00000002227	ENSOARP00000002351	0	.	SCHIP1	schwannomin interacting protein 1	1	.	XP_005201799.1 (Bos taurus: 99.6% identity in aln 96.3% length of target) | XP_006072914.1 (Bubalus bubalis: 99.6% identity in aln 90.4% length of target) | XP_014419585.1 (Camelus ferus: 99.1% identity in aln 99.6% length of target) | XP_005984886.1 (Pantholops hodgsonii: 100.0% identity in aln 96.3% length of target)	432	15	3.5	149	5	84.5	schwannomin-interacting protein 1	schwannomin-interacting protein 1-like | Schwannomin-interacting protein 1 | schwannomin-interacting protein 1 isoform 2 | schwannomin-interacting protein 1 isoform 3 | schwannomin interacting protein 1 S homeolog | schwannomin-interacting protein 1 isoform 1 | schwannomin-interacting protein 1 isoform b | schwannomin-interacting protein 1-like isoform 1 | SCHIP1 protein | SCHIP-1 | schwannomin-i…	.	.	.	.	.
ENSOARG00000002234	ENSOARP00000002361	0	.	SLC2A3	solute carrier family 2 member 3	1	.	NP_777028.2 (Bos taurus: 99.0% identity in aln 100.0% length of target) | XP_006192215.1 (Camelus ferus: 92.9% identity in aln 99.8% length of target) | XP_006218449.1 (Vicugna pacos: 92.7% identity in aln 99.8% length of target)	12	6	50	10	5	83.3	solute carrier family 2, facilitated glucose transporter member 3	RecName: Full=Solute carrier family 2, facilitated glucose transporter member 3; AltName: Full=Glucose transporter type 3, brain; Short=GLUT-3 | solute carrier family 2, facilitated glucose transporter member 3-like	.	.	.	.	.
ENSOARG00000002252	ENSOARP00000002384	0	.	SLC22A9	solute carrier family 22 member 9-like	8	.	.	0	0	0	0	0	0	.	.	0	0	.	.	.
ENSOARG00000002290	ENSOARP00000002424	0	.	GRK1	G protein-coupled receptor kinase 1	4	.	.	7	7	100	5	6	85.7	rhodopsin kinase	rhodopsin kinase precursor	0	0	.	.	.
ENSOARG00000002294	ENSOARP00000002431	8	ENSOARG00000000359, ENSOARG00000000443, ENSOARG00000000528, ENSOARG00000000546, ENSOARG00000000597, ENSOARG00000000628, ENSOARG00000000704, ENSOARG00000015929	SLC7A3	solute carrier family 7 member 3	1	.	XP_015313851.1 (Bos taurus: 92.7% identity in aln 98.0% length of target) | XP_010837309.1 (Bison bison bison: 93.0% identity in aln 100.0% length of target)	10	9	90	5	5	80	cationic amino acid transporter 3-like	cationic amino acid transporter 3	3	-1,+2	.	CCDC88A,CFAP36,PPP4R3B,PNPT1	.
ENSOARG00000002309	ENSOARP00000002448	0	.	CFAP36	cilia and flagella associated protein 36	1	.	XP_005686678.1 (Capra hircus: 99.7% identity in aln 100.0% length of target) | XP_005212663.1 (Bos taurus: 98.3% identity in aln 100.0% length of target) | XP_010839961.1 (Bison bison bison: 98.0% identity in aln 100.0% length of target) | XP_006174520.1 (Camelus ferus: 92.7% identity in aln 100.0% length of target) | XP_006217789.1 (Vicugna pacos: 91.8% identity in aln 100.0% length of target)	31	7	22.6	24	7	83.9	cilia and flagella associated protein 36	coiled-coil domain-containing protein 104	0	0	.	.	.
ENSOARG00000002321	ENSOARP00000002455	0	.	STK11IP	serine/threonine-protein kinase 11-interacting protein	8	.	.	0	0	0	0	0	0	.	.	.	.	.	.	.
ENSOARG00000002358	ENSOARP00000002501	0	.	C10orf32	C10orf32	1	.	XP_006067831.1 (Bubalus bubalis: 99.0% identity in aln 100.0% length of target) | XP_006183041.1 (Camelus ferus: 99.0% identity in aln 100.0% length of target)	52	2	3.8	76	2	92.3	UPF0693 protein C10orf32 homolog	RecName: Full=UPF0693 protein UPF0693 protein C10orf32 | RecName: Full=UPF0693 protein C10orf32 homolog | LOC613274 protein	.	.	.	.	.
ENSOARG00000002368	ENSOARP00000002512	0	.	TIMM23	translocase of inner mitochondrial membrane 23	1	NP_006318.1 (97.6% identity in aln 100.0% length of target)	XP_013831147.1 (Capra hircus: 98.6% identity in aln 100.0% length of target) | XP_005900665.1 (Bos mutus: 97.6% identity in aln 100.0% length of target) | NP_001077127.1 (Bos taurus: 98.6% identity in aln 100.0% length of target) | XP_006065746.1 (Bubalus bubalis: 99.0% identity in aln 100.0% length of target) | XP_005960998.1 (Pantholops hodgsonii: 98.6% identity in aln 100.0% length of target)	47	5	10.6	59	4	89.4	mitochondrial import inner membrane translocase subunit Tim23	RecName: Full=Mitochondrial import inner membrane translocase subunit Tim23 | mitochondrial import inner membrane translocase subunit Tim23-like | Translocase of inner mitochondrial membrane 23 homolog (yeast) | translocase of inner mitochondrial membrane 23 (yeast) homolog	0	0	.	.	.
ENSOARG00000002383	ENSOARP00000002527	1	ENSOARG00000001904	FSCN3	fascin actin-bundling protein 3	1	.	XP_005679487.1 (Capra hircus: 99.8% identity in aln 100.0% length of target) | XP_014333029.1 (Bos mutus: 97.8% identity in aln 100.0% length of target) | XP_015326148.1 (Bos taurus: 97.4% identity in aln 100.0% length of target) | XP_006069777.1 (Bubalus bubalis: 97.4% identity in aln 100.0% length of target) | XP_010830023.1 (Bison bison bison: 97.4% identity in aln 100.0% length of target) | X…	15	9	60	12	8	100	fascin-3	.	0	0	ENSOARG00000010192/ENSBTAG00000048024	.	ENSOARG00000002392/PNRC2
ENSOARG00000002384	ENSOARP00000002523	1	ENSOARG00000000073	SRSF10	serine and arginine rich splicing factor 10	1	.	XP_005676907.1 (Capra hircus: 97.3% identity in aln 100.0% length of target) | XP_005203328.1 (Bos taurus: 98.1% identity in aln 100.0% length of target)	40	2	5	89	2	90	serine/arginine-rich splicing factor 10	serine/arginine-rich splicing factor 10 isoform 1 | neural specific sr protein NSSR 1 | serine/arginine-rich splicing factor 10 isoform 2 | FUS interacting protein (serine-arginine rich) 1 isoform 2 variant	.	.	.	.	.
ENSOARG00000002405	ENSOARP00000002559	0	.	CDK11B	cyclin-dependent kinase 11B	8	.	.	0	0	0	0	0	0	.	.	0	0	.	.	.
ENSOARG00000002421	ENSOARP00000002567	2	ENSOARG00000002438, ENSOARG00000002456	TAAR6	trace amine associated receptor 6	1	.	XP_012014174.1 (Ovis aries musimon: 97.7% identity in aln 100.0% length of target) | XP_005684817.1 (Capra hircus: 97.1% identity in aln 100.0% length of target) | XP_014338087.1 (Bos mutus: 95.9% identity in aln 99.4% length of target) | XP_003586525.1 (Bos taurus: 95.1% identity in aln 100.0% length of target) | XP_006059375.1 (Bubalus bubalis: 95.0% identity in aln 100.0% length of target) | X…	25	24	96	5	6	100	trace amine-associated receptor 6	.	3	-3,0	ENSOARG00000001952/SPAG6	PIP4K2A,ARMC3,MSRB2,PTF1A	ENSOARG00000002579/ENSBTAG00000044137
ENSOARG00000002426	ENSOARP00000002575	0	.	PTF1A	pancreas specific transcription factor, 1a	4	.	.	52	1	1.9	49	1	94.2	pancreas transcription factor 1 subunit alpha	pancreas transcription factor 1 subunit alpha-like | Pancreas transcription factor 1 subunit alpha	0	0	.	.	.
ENSOARG00000002438	ENSOARP00000002589	2	ENSOARG00000002421, ENSOARG00000002456	TAAR6	trace amine associated receptor 6	1	.	XP_012014174.1 (Ovis aries musimon: 95.9% identity in aln 100.0% length of target) | XP_005684818.1 (Capra hircus: 96.8% identity in aln 100.0% length of target) | XP_014338087.1 (Bos mutus: 94.8% identity in aln 99.4% length of target) | XP_003586525.1 (Bos taurus: 94.8% identity in aln 100.0% length of target) | XP_006059375.1 (Bubalus bubalis: 94.7% identity in aln 100.0% length of target) | X…	26	25	96.2	5	6	100	trace amine-associated receptor 6	.	0	0	ENSOARG00000002495/MYLK4	.	.
ENSOARG00000002439	ENSOARP00000002590	0	.	WRNIP1	ATPase WRNIP1	8	.	.	0	0	0	0	0	0	.	.	4	0,+4	ENSOARG00000002840/ENSBTAG00000011642	LARS,PLAC8L1,SH3RF2,GRXCR2,PRELID2	.
ENSOARG00000002454	ENSOARP00000002619	0	.	LARS	leucyl-tRNA synthetase	8	.	.	0	0	0	0	0	0	.	.	0	0	.	.	.
ENSOARG00000002456	ENSOARP00000002603	2	ENSOARG00000002421, ENSOARG00000002438	TAAR6	trace amine associated receptor 6	1	.	XP_012014169.1 (Ovis aries musimon: 98.6% identity in aln 100.0% length of target) | XP_005684819.1 (Capra hircus: 97.7% identity in aln 100.0% length of target) | XP_014338087.1 (Bos mutus: 92.2% identity in aln 100.0% length of target) | NP_001193494.1 (Bos taurus: 91.3% identity in aln 100.0% length of target) | XP_006059374.1 (Bubalus bubalis: 95.0% identity in aln 99.7% length of target) | X…	25	24	96	5	6	100	trace amine-associated receptor 6	.	.	.	.	.	.
ENSOARG00000002473	ENSOARP00000002625	3	ENSOARG00000014333, ENSOARG00000014359, ENSOARG00000014383	TAAR7	TAAR7	1	.	XP_012014173.1 (Ovis aries musimon: 92.7% identity in aln 99.7% length of target) | XP_013822014.1 (Capra hircus: 95.3% identity in aln 100.0% length of target) | XP_006040924.1 (Bubalus bubalis: 93.7% identity in aln 97.1% length of target) | XP_010842612.1 (Bison bison bison: 91.8% identity in aln 99.1% length of target) | XP_005967613.1 (Pantholops hodgsonii: 92.4% identity in aln 99.7% length…	17	16	94.1	5	6	76.5	trace amine-associated receptor 7a-like	trace amine-associated receptor 7a	.	.	.	.	.
ENSOARG00000002488	ENSOARP00000002637	0	.	PRORSD1	PRORSD1	7	.	.	1	0	0	1	0	100	prolyl-tRNA synthetase associated domain-containing protein 1	.	.	.	.	.	.
ENSOARG00000002491	ENSOARP00000002640	0	.	MOBP	myelin-associated oligodendrocyte basic protein	1	.	XP_005695624.1 (Capra hircus: 100.0% identity in aln 100.0% length of target) | NP_001071347.1 (Bos taurus: 97.5% identity in aln 100.0% length of target) | XP_005975911.1 (Pantholops hodgsonii: 98.8% identity in aln 100.0% length of target)	81	11	13.6	49	5	93.8	myelin-associated oligodendrocyte basic protein	myelin-associated oligodendrocyte basic protein isoform b | MOBP | MOBP73 | myelin-associated oligodendrocyte basic protein-like | myelin-associated oligodendrocyte basic protein isoform c	.	.	.	.	.
ENSOARG00000002510	ENSOARP00000002664	0	.	TAAR4	TAAR4	1	.	XP_012014166.1 (Ovis aries musimon: 99.7% identity in aln 99.7% length of target) | XP_005684892.1 (Capra hircus: 99.1% identity in aln 99.7% length of target) | XP_005887811.1 (Bos mutus: 96.2% identity in aln 99.7% length of target) | XP_006059379.1 (Bubalus bubalis: 96.8% identity in aln 99.7% length of target) | XP_010842594.1 (Bison bison bison: 96.8% identity in aln 99.7% length of target) …	7	6	85.7	5	6	100	trace amine-associated receptor 4	.	.	.	.	.	.
ENSOARG00000002527	ENSOARP00000002683	0	.	TAAR3	trace amine associated receptor 3 (gene/pseudogene)	1	.	XP_012014165.2 (Ovis aries musimon: 100.0% identity in aln 100.0% length of target) | XP_005684821.1 (Capra hircus: 98.5% identity in aln 100.0% length of target) | XP_005887796.1 (Bos mutus: 97.7% identity in aln 100.0% length of target) | XP_010842593.1 (Bison bison bison: 97.4% identity in aln 100.0% length of target) | XP_006185223.1 (Camelus ferus: 91.3% identity in aln 100.0% length of targ…	27	8	29.6	22	8	88.9	trace amine-associated receptor 3	trace amine-associated receptor 3-like	0	0	.	.	.
ENSOARG00000002563	ENSOARP00000002721	0	.	CILP2	cartilage intermediate layer protein 2	3	.	XP_011983993.1 (Ovis aries musimon: 99.0% identity in aln 50.7% length of target) | XP_005910496.1 (Bos mutus: 97.4% identity in aln 53.5% length of target) | XP_006199217.1 (Vicugna pacos: 90.9% identity in aln 51.6% length of target) | XP_005972450.1 (Pantholops hodgsonii: 97.6% identity in aln 67.9% length of target)	13	6	46.2	9	5	84.6	cartilage intermediate layer protein 2	Cartilage intermediate layer protein 2 | cartilage intermediate layer protein 2 precursor	.	.	.	.	.
ENSOARG00000002573	ENSOARP00000002732	1	ENSOARG00000002789	ZNF621	zinc finger protein 621	1	.	XP_012004484.1 (Ovis aries musimon: 98.910% identity in aln 88.6% length of target)XP_012004485.1 (Ovis aries musimon: 98.9% identity in aln 90.4% length of target) | XP_013828817.1 (Capra hircus: 98.6% identity in aln 90.4% length of target)	3	3	100	1	2	100	zinc finger protein 621-like	.	0	0	ENSOARG00000002559/ABCB10	.	ENSOARG00000010226/ACTA1
ENSOARG00000002575	ENSOARP00000002734	0	.	NUP133	nucleoporin 133	8	.	.	0	0	0	0	0	0	.	.	.	.	.	.	.
ENSOARG00000002599	ENSOARP00000002759	1	ENSOARG00000002559	PCDH11X	protocadherin 11 X-linked	1	.	XP_014964875.1 (Ovis aries musimon: 100.000% identity in aln 100.0% length of target)XP_014964875.1 (Ovis aries musimon: 100.0% identity in aln 100.0% length of target) | XP_005896801.1 (Bos mutus: 97.3% identity in aln 100.0% length of target) | XP_015317028.1 (Bos taurus: 97.4% identity in aln 100.0% length of target)	7	7	100	1	2	100	protocadherin-11 X-linked	.	2	0,+2	.	CLEC6A,CLEC4D,CLEC4E	.
ENSOARG00000002605	ENSOARP00000002763	0	.	CLEC6A	C-type lectin domain family 6 member A	3	.	NP_001029651.1 (Bos taurus: 100.0% identity in aln 57.6% length of target)	7	6	85.7	5	4	85.7	C-type lectin domain family 6 member A	RecName: Full=C-type lectin domain family 6 member A; AltName: Full=Dendritic cell-associated C-type lectin 2; Short=DC-associated C-type lectin 2; Short=Dectin-2	5	-5,0	ENSOARG00000002273/MPRIP	TNFRSF13B,USP22,DHRS7B,TMEM11,NATD1,MAP2K3	.
ENSOARG00000002612	ENSOARP00000002773	0	.	MAP2K3	mitogen-activated protein kinase kinase 3	1	XP_016880346.1 (97.6% identity in aln 96.5% length of target)	XP_011982897.1 (Ovis aries musimon: 98.6% identity in aln 100.0% length of target) | XP_005693688.1 (Capra hircus: 98.3% identity in aln 100.0% length of target) | NP_001077162.1 (Bos taurus: 98.6% identity in aln 100.0% length of target) | XP_006070250.1 (Bubalus bubalis: 98.0% identity in aln 100.0% length of target) | XP_010841164.1 (Bison bison bison: 98.3% identity in aln 100.0% length of ta…	94	8	8.5	71	7	81.9	dual specificity mitogen-activated protein kinase kinase 3	Dual specificity mitogen-activated protein kinase kinase 3 | dual specificity mitogen-activated protein kinase kinase 3-like | MAP2K3 | dual specificity mitogen-activated protein kinase kinase 3 isoform 1 | dual specificity mitogen-activated protein kinase kinase 3 isoform B | dual specificity mitogen-activated protein kinase kinase 3 isoform 3 | dual specificity mitogen-activated protein kinase …	0	0	.	.	.
ENSOARG00000002623	ENSOARP00000002785	0	.	CEP162	centrosomal protein of 162 kDa	8	.	.	0	0	0	0	0	0	.	.	.	.	.	.	.
ENSOARG00000002642	ENSOARP00000002802	0	.	SLIRP	SRA stem-loop interacting RNA binding protein	1	.	XP_005686225.1 (Capra hircus: 97.3% identity in aln 100.0% length of target) | XP_005908468.1 (Bos mutus: 96.4% identity in aln 100.0% length of target) | NP_001032562.1 (Bos taurus: 97.3% identity in aln 100.0% length of target) | XP_006052951.1 (Bubalus bubalis: 97.3% identity in aln 100.0% length of target) | XP_010842696.1 (Bison bison bison: 96.4% identity in aln 100.0% length of target) | X…	10	7	70	8	5	90	SRA stem-loop-interacting RNA-binding protein, mitochondrial	SRA stem-loop-interacting RNA-binding protein, mitochondrial-like	0	0	.	.	.
ENSOARG00000002684	ENSOARP00000002846	0	.	GXYLT2	glucoside xylosyltransferase 2	4	.	.	94	7	7.4	78	6	93.6	glucoside xylosyltransferase 2	glucoside xylosyltransferase 2 precursor | Glucoside xylosyltransferase 2 | serine/threonine-protein phosphatase 4 regulatory subunit 2-like protein	0	0	ENSOARG00000004144/ACSL3	.	ENSOARG00000004133/MOGAT1
ENSOARG00000002697	ENSOARP00000002861	0	.	RPS6	ribosomal protein S6	1	.	XP_005683689.1 (Capra hircus: 94.0% identity in aln 100.0% length of target) | NP_001015548.1 (Bos taurus: 94.0% identity in aln 100.0% length of target) | XP_006180439.1 (Camelus ferus: 92.8% identity in aln 100.0% length of target) | XP_005977735.1 (Pantholops hodgsonii: 92.8% identity in aln 100.0% length of target)	116	4	3.4	140	4	81.9	40S ribosomal protein S6	40S ribosomal protein S6-like | 40S ribosomal protein S6-like protein | Phosphoprotein NP33 | ribosomal protein S6 (predicted) | Chain G, Structure Of The Hcv Ires Bound To The Human Ribosome | Chain q, M48s Late-stage Initiation Complex, Purified From Rabbit Reticulocytes Lysates, Displaying Eif2 Ternary Complex And Eif3 I And G Subunits Relocated To The Intersubunit Face | ribosomal protein s6 …	.	.	.	.	.
ENSOARG00000002701	ENSOARP00000002867	0	.	SIGLEC5	sialic acid-binding Ig-like lectin 5	8	.	.	0	0	0	0	0	0	.	.	.	.	.	.	.
ENSOARG00000002707	ENSOARP00000002869	0	.	DACH2	dachshund family transcription factor 2	1	.	XP_012026411.1 (Ovis aries musimon: 99.7% identity in aln 93.1% length of target)	12	1	8.3	9	1	91.7	dachshund homolog 2	Dachshund like protein 2	0	0	.	.	.
ENSOARG00000002710	ENSOARP00000002873	0	.	TSTD1	thiosulfate sulfurtransferase like domain containing 1	8	.	.	0	0	0	0	0	0	.	.	0	0	.	.	.
ENSOARG00000002734	ENSOARP00000002899	0	.	DDX49	DEAD-box helicase 49	4	.	.	118	10	8.5	83	7	93.2	probable ATP-dependent RNA helicase DDX49	Putative ATP-dependent RNA helicase DDX49 | Ddx49-A-prov protein | DEAD (Asp-Glu-Ala-Asp) box polypeptide 49 variant | DEAD (Asp-Glu-Ala-Asp) box polypeptide 49 | rCG38846	2	-1,+1	ENSOARG00000003003/CYP4A22	CYP4B1,EFCAB14,TEX38	ENSOARG00000002611/ENSBTAG00000048006
ENSOARG00000002745	ENSOARP00000002916	0	.	EFCAB14	EF-hand calcium binding domain 14	1	.	XP_011987056.1 (Ovis aries musimon: 99.8% identity in aln 100.0% length of target) | XP_005678557.1 (Capra hircus: 99.0% identity in aln 100.0% length of target) | XP_005894295.1 (Bos mutus: 97.4% identity in aln 100.0% length of target) | XP_006052575.1 (Bubalus bubalis: 97.2% identity in aln 100.0% length of target) | XP_010846189.1 (Bison bison bison: 97.6% identity in aln 100.0% length of tar…	11	6	54.5	9	6	100	EF-hand calcium-binding domain-containing protein 14	.	0	0	.	.	.
ENSOARG00000002764	ENSOARP00000002933	2	ENSOARG00000008168, ENSOARG00000010413	RPS25	ribosomal protein S25	1	NP_001019.1 (99.2% identity in aln 100.0% length of target)	.	55	5	9.1	109	3	80	40S ribosomal protein S25	40S ribosomal protein S25-like | ribosomal protein S25 (predicted) | mCG1027072 | mCG10725, isoform CRA_b	0	0	.	.	.
ENSOARG00000002771	ENSOARP00000002943	0	.	C3	complement C3	4	.	.	9	6	66.7	5	4	77.8	complement C3	complement component 3 | prepro complement component C3	0	0	.	.	.
ENSOARG00000002774	ENSOARP00000002945	0	.	MCM2	minichromosome maintenance complex component 2	4	.	.	188	9	4.8	136	8	77.1	DNA replication licensing factor MCM2	DNA replication licensing factor mcm2 | Minichromosome maintenance complex component 2 | DNA replication licensing factor MCM2 isoform 2 | MCM2 minichromosome maintenance deficient 2, mitotin (S. cerevisiae) | mKIAA0030 protein | huMCM2 | mMCM2 | DNA replication licensing factor MCM2-like | MCM2 protein | polypeptide BM28 | BM28 homolog | DNA replication licensing factor MCM2 isoform 1	1	-1,0	ENSOARG00000002556/PPP1R15B	PIK3C2B,MDM4	.
ENSOARG00000002783	ENSOARP00000002957	0	.	MDM4	MDM4, p53 regulator	1	.	XP_005690447.1 (Capra hircus: 99.4% identity in aln 100.0% length of target) | XP_005898449.1 (Bos mutus: 96.3% identity in aln 100.0% length of target) | XP_005216725.1 (Bos taurus: 96.3% identity in aln 100.0% length of target) | XP_006062351.1 (Bubalus bubalis: 96.3% identity in aln 100.0% length of target) | XP_010852458.1 (Bison bison bison: 96.5% identity in aln 100.0% length of target) | X…	23	9	39.1	15	7	95.7	protein Mdm4	protein Mdm4-like	.	.	.	.	.
ENSOARG00000002789	ENSOARP00000002958	1	ENSOARG00000002573	ZNF621	zinc finger protein 621	1	.	XP_011954802.1 (Ovis aries: 100.000% identity in aln 92.6% length of target)XP_012004481.1 (Ovis aries musimon: 100.0% identity in aln 96.6% length of target) | XP_013828818.1 (Capra hircus: 97.0% identity in aln 100.0% length of target) | XP_010833772.1 (Bison bison bison: 96.8% identity in aln 96.7% length of target)	6	6	100	2	3	100	zinc finger protein 621-like	.	.	.	.	.	.
ENSOARG00000002794	ENSOARP00000002971	0	.	KCNQ1	potassium voltage-gated channel subfamily KQT member 1	8	.	.	0	0	0	0	0	0	.	.	.	.	.	.	.
ENSOARG00000002808	ENSOARP00000002982	0	.	WNT10B	Wnt family member 10B	1	.	XP_013819150.1 (Capra hircus: 99.7% identity in aln 100.0% length of target) | XP_006054610.1 (Bubalus bubalis: 95.7% identity in aln 94.4% length of target)	6	3	50	5	3	83.3	protein Wnt-10b	Wnt family member 10B	0	0	.	.	.
ENSOARG00000002810	ENSOARP00000002984	0	.	WIPI1	WD repeat domain, phosphoinositide interacting 1	4	.	.	18	6	33.3	13	6	94.4	WD repeat domain phosphoinositide-interacting protein 1	WD repeat domain phosphoinositide-interacting protein 1-like	.	.	.	.	.
ENSOARG00000002824	ENSOARP00000003008	0	.	PTPRT	protein tyrosine phosphatase, receptor type T	8	.	.	0	0	0	0	0	0	.	.	0	0	.	.	.
ENSOARG00000002849	ENSOARP00000003025	1	ENSOARG00000010995	PPDPF	pancreatic progenitor cell differentiation and proliferation factor	1	.	XP_014339053.1 (Bos mutus: 98.1% identity in aln 92.2% length of target) | XP_010809715.1 (Bos taurus: 97.2% identity in aln 92.2% length of target) | XP_010834882.1 (Bison bison bison: 96.2% identity in aln 92.2% length of target) | XP_015099411.1 (Vicugna pacos: 92.5% identity in aln 92.2% length of target)	9	6	66.7	6	4	88.9	pancreatic progenitor cell differentiation and proliferation factor	pancreatic progenitor cell differentiation and proliferation factor-like	.	.	.	.	.
ENSOARG00000002856	ENSOARP00000003034	0	.	ART5	ADP-ribosyltransferase 5	1	.	XP_012010535.1 (Ovis aries musimon: 97.5% identity in aln 100.0% length of target) | XP_005689925.1 (Capra hircus: 93.4% identity in aln 100.0% length of target) | XP_015330254.1 (Bos taurus: 91.5% identity in aln 100.0% length of target) | XP_010847761.1 (Bison bison bison: 91.5% identity in aln 100.0% length of target)	9	9	100	4	5	77.8	ADP-ribosyltransferase 5	ecto-ADP-ribosyltransferase 5 precursor | ecto-ADP-ribosyltransferase 5-like	.	.	.	.	.
ENSOARG00000002869	ENSOARP00000003052	0	.	LEKR1	leucine, glutamate and lysine rich 1	1	.	XP_011956194.1 (Ovis aries: 98.701% identity in aln 100.0% length of target)XP_005902130.1 (Bos mutus: 96.0% identity in aln 100.0% length of target) | XP_015328390.1 (Bos taurus: 96.2% identity in aln 100.0% length of target) | XP_006077434.1 (Bubalus bubalis: 94.7% identity in aln 100.0% length of target) | XP_005957182.1 (Pantholops hodgsonii: 97.9% identity in aln 100.0% length of target)	6	6	100	3	4	100	leucine-, glutamate- and lysine-rich protein 1	.	.	.	.	.	.
ENSOARG00000002892	ENSOARP00000003073	0	.	EIF3C	eukaryotic translation initiation factor 3 subunit C	1	.	XP_005894555.1 (Bos mutus: 99.6% identity in aln 100.0% length of target) | NP_001029790.1 (Bos taurus: 99.5% identity in aln 100.0% length of target) | XP_006070582.1 (Bubalus bubalis: 99.6% identity in aln 100.0% length of target) | XP_005963225.1 (Pantholops hodgsonii: 99.9% identity in aln 100.0% length of target)	5	5	100	5	4	100	eukaryotic translation initiation factor 3 subunit C	.	7	-2,+5	.	HELB,IRAK3,TMBIM4,LLPH,HMGA2,MSRB3,LEMD3,WIF1	.
ENSOARG00000002903	ENSOARP00000003084	0	.	TMBIM4	transmembrane BAX inhibitor motif containing 4	2	.	XP_011995634.1 (Ovis aries musimon: 100.0% identity in aln 86.6% length of target) | XP_013819346.1 (Capra hircus: 99.0% identity in aln 86.6% length of target) | NP_001014914.1 (Bos taurus: 97.6% identity in aln 86.6% length of target) | XP_010839876.1 (Bison bison bison: 97.1% identity in aln 86.6% length of target) | XP_006174307.1 (Camelus ferus: 91.7% identity in aln 86.6% length of target) …	14	6	42.9	11	6	92.9	protein lifeguard 4	Transmembrane BAX inhibitor motif-containing protein 4	0	0	.	.	.
ENSOARG00000002911	ENSOARP00000003090	1	ENSOARG00000004965	TMEM81	transmembrane protein 81	1	.	XP_005690453.1 (Capra hircus: 98.9% identity in aln 100.0% length of target) | XP_005901479.1 (Bos mutus: 93.1% identity in aln 100.0% length of target) | XP_006062335.1 (Bubalus bubalis: 93.1% identity in aln 100.0% length of target) | XP_010852465.1 (Bison bison bison: 93.1% identity in aln 100.0% length of target) | XP_005962697.1 (Pantholops hodgsonii: 96.4% identity in aln 100.0% length of t…	7	7	100	5	6	85.7	transmembrane protein 81	transmembrane protein 81 precursor	0	0	.	.	.
ENSOARG00000002916	ENSOARP00000003096	0	.	ARHGEF10L	Rho guanine nucleotide exchange factor 10 like	4	.	.	360	24	6.7	82	5	90.6	rho guanine nucleotide exchange factor 10-like protein	Rho guanine nucleotide exchange factor 10-like protein | Rho guanine nucleotide exchange factor (GEF) 10-like | rho guanine nucleotide exchange factor 10-like protein isoform 2 | rho guanine nucleotide exchange factor 10-like protein isoform b | rho guanine nucleotide exchange factor 10-like protein isoform a | ARHGEF10L protein | mKIAA1626 protein | rho guanine nucleotide exchange factor 10-like…	7	-3,+4	.	WIF1,LEMD3,MSRB3,HMGA2,LLPH,TMBIM4,IRAK3,HELB	.
ENSOARG00000002929	ENSOARP00000003109	0	.	HMGA2	high mobility group AT-hook 2	5	.	.	27	0	0	76	0	92.6	high mobility group protein HMGI-C	truncated DNA architectural factor HMGA2 | high mobility group protein HMGI-C isoform a	0	0	ENSOARG00000002941/RAET1G	.	.
ENSOARG00000002948	ENSOARP00000003134	0	.	PPP1R14C	protein phosphatase 1 regulatory inhibitor subunit 14C	4	.	.	15	3	20	11	2	93.3	protein phosphatase 1 regulatory subunit 14C	Protein phosphatase 1 regulatory subunit 14C	5	0,+5	.	FAM71F2,FAM71F1,CALU,OPN1SW,CCDC136,FLNC	.
ENSOARG00000002963	ENSOARP00000003153	0	.	FAM71F2	family with sequence similarity 71 member F2	1	.	XP_005679495.1 (Capra hircus: 98.0% identity in aln 100.0% length of target) | XP_005893731.1 (Bos mutus: 94.3% identity in aln 100.0% length of target) | NP_001039932.2 (Bos taurus: 94.3% identity in aln 100.0% length of target) | XP_006074458.1 (Bubalus bubalis: 93.7% identity in aln 100.0% length of target) | XP_010830010.1 (Bison bison bison: 94.3% identity in aln 100.0% length of target) | X…	7	7	100	5	6	100	protein FAM71F2	.	2	0,+2	.	PEBP1,TAOK3,SUDS3	ENSOARG00000002266/SRRM4
ENSOARG00000002966	ENSOARP00000003155	2	ENSOARG00000015641, ENSOARG00000016721	PEBP1	phosphatidylethanolamine binding protein 1	1	NP_002558.1 (93.6% identity in aln 100.0% length of target)	NP_001028795.1 (Bos taurus: 98.9% identity in aln 100.0% length of target) | XP_006074296.1 (Bubalus bubalis: 99.5% identity in aln 100.0% length of target)	63	6	9.5	54	5	92.1	phosphatidylethanolamine-binding protein 1	phosphatidylethanolamine-binding protein 1-like | Chain A, Phosphatidylethanolamine Binding Protein From Calf Brain | Chain A, Structure Of The Phosphatidylethanolamine-Binding Protein From Bovine Brain | neuropolypeptide h3	12	-3,+9	.	COX5A,FAM219B,MPI,SCAMP2,ULK3,CPLX3,LMAN1L,CSK,CYP1A2,CYP1A1,EDC3,CLK3,ARID3B	ENSOARG00000003696/UBL7
ENSOARG00000002968	ENSOARP00000003156	0	.	SCAMP2	secretory carrier-associated membrane protein 2	8	.	.	0	0	0	0	0	0	.	.	.	.	.	.	.
ENSOARG00000002983	ENSOARP00000003173	1	.	SSU72	SSU72	1	.	XP_006193082.2 (Camelus ferus: 91.1% identity in aln 96.0% length of target)	107	9	8.4	153	7	92.5	RNA polymerase II subunit A C-terminal domain phosphatase SSU72	RNA polymerase II subunit A C-terminal domain phosphatase SSU72-like | Chain B, Crystal Structure Of The Human Symplekin-Ssu72 Complex | RNA polymerase II subunit A domain phosphatase SSU72-like protein | PNAS-120 | Chain B, Crystal Structure Of The Human Symplekin-Ssu72-Ctd Phosphopeptide Complex	.	.	.	.	.
ENSOARG00000002994	ENSOARP00000003189	0	.	CLN3	CLN3, battenin	1	.	XP_011980099.1 (Ovis aries musimon: 99.8% identity in aln 100.0% length of target) | XP_005697710.1 (Capra hircus: 99.5% identity in aln 100.0% length of target) | XP_005894552.1 (Bos mutus: 96.8% identity in aln 100.0% length of target) | XP_005224902.1 (Bos taurus: 97.0% identity in aln 100.0% length of target) | XP_006070577.1 (Bubalus bubalis: 95.4% identity in aln 100.0% length of target) | …	17	12	70.6	11	7	94.1	battenin	battenin isoform 2	1	0,+1	.	DNAJC8,PTAFR	ENSOARG00000003049/ENSBTAG00000009937
ENSOARG00000003035	ENSOARP00000003227	1	.	DNAJC8	DNAJC8	1	NP_055095.2 (98.8% identity in aln 100.0% length of target)	XP_005895980.1 (Bos mutus: 98.8% identity in aln 100.0% length of target)	39	1	2.6	75	1	84.6	dnaJ homolog subfamily C member 8	dnaJ homolog subfamily C member 8-like | DnaJ (Hsp40) homolog, subfamily C, member 8, isoform CRA_a | SPF31 | Dnajc8 protein | DNAJC8	5	-5,0	.	URB2,TAF5L,ABCB10,NUP133,ACTA1,CCSAP	.
ENSOARG00000003038	ENSOARP00000003230	0	.	CCSAP	centriole, cilia and spindle associated protein	3	.	XP_012022598.1 (Ovis aries musimon: 99.3% identity in aln 55.5% length of target) | XP_013830971.1 (Capra hircus: 99.3% identity in aln 55.5% length of target) | XP_014334015.1 (Bos mutus: 91.2% identity in aln 56.1% length of target) | XP_015316400.1 (Bos taurus: 91.8% identity in aln 51.0% length of target) | XP_006063113.1 (Bubalus bubalis: 92.5% identity in aln 55.3% length of target) | XP_01…	10	9	90	5	6	100	centriole, cilia and spindle-associated protein	.	2	-2,0	ENSOARG00000002855/ENSBTAG00000044018	LRRC8E,MAP2K7,SNAPC2	ENSOARG00000016463/CTXN1
ENSOARG00000003045	ENSOARP00000003240	0	.	SNAPC2	small nuclear RNA activating complex polypeptide 2	2	.	XP_011991646.1 (Ovis aries musimon: 99.3% identity in aln 82.4% length of target) | XP_005890805.1 (Bos mutus: 93.6% identity in aln 82.4% length of target) | NP_001029688.1 (Bos taurus: 93.2% identity in aln 82.4% length of target) | XP_006046807.1 (Bubalus bubalis: 94.0% identity in aln 82.4% length of target) | XP_010826577.1 (Bison bison bison: 93.6% identity in aln 82.4% length of target) | …	9	9	100	4	5	100	snRNA-activating protein complex subunit 2	.	5	-3,+2	.	URB2,TAF5L,ABCB10,NUP133,ACTA1,CCSAP	.
ENSOARG00000003060	ENSOARP00000003262	0	.	NUP133	nucleoporin 133	7	.	.	2	0	0	1	0	100	nuclear pore complex protein Nup133	.	.	.	.	.	.
ENSOARG00000003072	ENSOARP00000003270	0	.	PTPRT	protein tyrosine phosphatase, receptor type T	1	.	XP_011997843.1 (Ovis aries musimon: 100.0% identity in aln 92.6% length of target)	412	10	2.4	116	6	84.7	receptor-type tyrosine-protein phosphatase T	receptor-type tyrosine-protein phosphatase T-like | Receptor-type tyrosine-protein phosphatase T | receptor-type tyrosine-protein phosphatase T isoform c precursor | receptor-type tyrosine-protein phosphatase T isoform d precursor | receptor-type tyrosine-protein phosphatase T isoform b precursor | receptor-type tyrosine-protein phosphatase T isoform 2 precursor | protein tyrosine phosphatase, re…	6	0,+6	.	LTC4S,MGAT4B,SQSTM1,MRNIP,TBC1D9B,RNF130,RASGEF1C	ENSOARG00000001741/ENSBTAG00000047695
ENSOARG00000003078	ENSOARP00000003272	0	.	LTC4S	leukotriene C4 synthase	4	.	.	28	4	14.3	23	3	100	leukotriene C4 synthase	.	5	-1,+4	.	URB2,TAF5L,ABCB10,NUP133,ACTA1,CCSAP	.
ENSOARG00000003083	ENSOARP00000003279	0	.	TAF5L	TATA-box binding protein associated factor 5 like	2	XP_005273157.1 (92.5% identity in aln 80.9% length of target)	.	77	9	11.7	55	6	97.4	TAF5-like RNA polymerase II p300/CBP-associated factor-associated factor 65 kDa subunit 5L	TAF5-like RNA polymerase II p300/CBP-associated factor-associated factor 65 kDa subunit 5L isoform a | TAF5-like RNA polymerase II, p300/CBP-associated factor (PCAF)-associated factor	0	0	.	.	.
ENSOARG00000003117	ENSOARP00000003319	0	.	SRSF6	serine/arginine-rich splicing factor 6	8	.	.	0	0	0	0	0	0	.	.	0	0	.	.	.
ENSOARG00000003125	ENSOARP00000003325	1	.	VN1R4	VN1R4	1	.	XP_012027540.1 (Ovis aries musimon: 97.020% identity in aln 100.0% length of target)XP_012027540.1 (Ovis aries musimon: 97.0% identity in aln 100.0% length of target) | XP_005693046.2 (Capra hircus: 90.4% identity in aln 97.4% length of target)	2	2	100	1	2	100	vomeronasal type-1 receptor 4	.	4	-1,+3	ENSOARG00000003742/WDFY3	CDS1,NKX6-1,GPAT3,FAM175A,MRPS18C	.
ENSOARG00000003161	ENSOARP00000003365	0	.	NKX6-1	NK6 homeobox 1	4	.	XP_011992373.1 (Ovis aries musimon: 100.000% identity in aln 25.9% length of target)	1	1	100	0	1	100	homeobox protein Nkx-6.1	.	0	0	ENSOARG00000003157/ARHGAP30	.	ENSOARG00000003172/TSTD1
ENSOARG00000003162	ENSOARP00000003367	0	.	USF1	upstream transcription factor 1	3	.	XP_005203518.1 (Bos taurus: 93.7% identity in aln 63.5% length of target)	4	1	25	6	1	75	upstream stimulatory factor 1	upstream stimulatory factor 1 isoform 2	.	.	.	.	.
ENSOARG00000003176	ENSOARP00000003381	0	.	L3MBTL1	l(3)mbt-like 1 (Drosophila)	3	.	XP_005688619.1 (Capra hircus: 99.0% identity in aln 68.7% length of target)	49	1	2	21	1	85.7	lethal(3)malignant brain tumor-like protein 1	Lethal(3)malignant brain tumor-like protein | L(3)mbt-like (Drosophila) | lethal(3)malignant brain tumor-like protein 1 isoform II | l(3)mbt-like (Drosophila), isoform CRA_c | l(3)mbt protein homolog | lethal(3)malignant brain tumor-like protein 1 isoform I	5	-5,0	ENSOARG00000003031/ENSBTAG00000002900	GALC,GPR65,KCNK10,SPATA7,PTPN21,ZC3H14	ENSOARG00000017584/EML5
ENSOARG00000003198	ENSOARP00000003421	0	.	ZC3H14	zinc finger CCCH domain-containing protein 14	8	.	.	0	0	0	0	0	0	.	.	.	.	.	.	.
ENSOARG00000003204	ENSOARP00000003428	0	.	LOXHD1	lipoxygenase homology domains 1	5	.	.	11	0	0	11	0	100	lipoxygenase homology domain-containing protein 1	.	.	.	.	.	.
ENSOARG00000003231	ENSOARP00000003448	0	.	ISY1	ISY1 splicing factor homolog	1	.	XP_011969559.1 (Ovis aries musimon: 97.2% identity in aln 99.6% length of target) | XP_005908168.1 (Bos mutus: 94.7% identity in aln 99.6% length of target) | NP_001178102.1 (Bos taurus: 94.0% identity in aln 99.6% length of target) | XP_014410853.1 (Camelus ferus: 90.8% identity in aln 97.6% length of target)	11	5	45.5	8	4	81.8	pre-mRNA-splicing factor ISY1 homolog	Pre-mRNA-splicing factor ISY1-like protein	1	0,+1	.	ZNF787,NLRP5	ENSOARG00000003197/NLRP8
ENSOARG00000003242	ENSOARP00000003451	0	.	ZNF787	zinc finger protein 787	4	.	.	60	4	6.7	47	4	88.3	zinc finger protein 787	Zinc finger protein 787 | zinc finger protein 787-like | RecName: Full=Zinc finger protein 787; AltName: Full=TTF-I-interacting peptide 20 | TTF-I interacting peptide 20	4	0,+4	ENSOARG00000003269/ENSBTAG00000003867	THEMIS2,RPA2,SMPDL3B,XKR8,EYA3	ENSOARG00000003049/ENSBTAG00000009937
ENSOARG00000003254	ENSOARP00000003465	0	.	THEMIS2	protein THEMIS2	8	.	.	0	0	0	0	0	0	.	.	0	0	.	.	ENSOARG00000003218/DDX58
ENSOARG00000003255	ENSOARP00000003466	1	.	TOPORS	TOPORS	1	.	XP_005684439.1 (Capra hircus: 99.4% identity in aln 96.0% length of target) | XP_015328151.1 (Bos taurus: 92.7% identity in aln 94.6% length of target) | XP_006069142.1 (Bubalus bubalis: 92.4% identity in aln 95.0% length of target) | XP_010841903.1 (Bison bison bison: 92.0% identity in aln 94.7% length of target) | XP_005982632.1 (Pantholops hodgsonii: 96.0% identity in aln 96.0% length of targe…	6	6	100	5	6	100	E3 ubiquitin-protein ligase Topors-like	.	0	0	.	.	.
ENSOARG00000003305	ENSOARP00000003515	0	.	TMEM94	transmembrane protein 94	5	.	.	105	0	0	25	0	88.6	transmembrane protein 94	2310067B10Rik protein | transmembrane protein 94 isoform 2 | KIAA0195, isoform CRA_c | transmembrane protein 94 isoform 1 | KIAA0195, isoform CRA_b | mKIAA0195 protein | Uncharacterized protein KIAA0195 | RIKEN cDNA 2310067B10, isoform CRA_b | similar to mKIAA0195 protein (predicted) | transmembrane protein 94 isoform 3 | KIAA0195	0	0	.	.	.
ENSOARG00000003322	ENSOARP00000003539	0	.	IMMP2L	inner mitochondrial membrane peptidase subunit 2	1	.	XP_010802544.1 (Bos taurus: 96.2% identity in aln 100.0% length of target)	111	10	9	72	5	81.1	mitochondrial inner membrane protease subunit 2	mitochondrial inner membrane protease subunit 2-like | Mitochondrial inner membrane protease subunit 2 | RecName: Full=Mitochondrial inner membrane protease subunit 2; AltName: Full=IMP2-like protein | IMMP2L protein | IMP2 inner mitochondrial membrane peptidase-like (S. cerevisiae), isoform CRA_b | Dedicator of cytokinesis protein 4 | inner mitochondrial membrane peptidase 2	1	-1,0	.	CANX,CBY3	.
ENSOARG00000003328	ENSOARP00000003545	0	.	CBY3	chibby family member 3	3	.	XP_010829313.1 (Bison bison bison: 95.804% identity in aln 39.0% length of target)XP_006058931.1 (Bubalus bubalis: 95.5% identity in aln 52.2% length of target)	3	3	100	2	3	100	protein chibby homolog 3	.	.	.	.	.	.
ENSOARG00000003361	ENSOARP00000003593	0	.	SULT1A1	sulfotransferase family 1A member 1	1	.	XP_005697714.1 (Capra hircus: 99.3% identity in aln 100.0% length of target) | XP_005894545.1 (Bos mutus: 96.6% identity in aln 100.0% length of target) | XP_005224892.1 (Bos taurus: 95.6% identity in aln 100.0% length of target) | XP_006070566.1 (Bubalus bubalis: 96.3% identity in aln 100.0% length of target) | XP_010835585.1 (Bison bison bison: 96.3% identity in aln 100.0% length of target) | X…	9	7	77.8	5	6	77.8	sulfotransferase 1A1	Sulfotransferase family, cytosolic, 1A, phenol-preferring, member 1 | Sulfotransferase 1A1	0	0	.	.	.
ENSOARG00000003386	ENSOARP00000003618	0	.	VNN2	vanin 2	1	.	XP_011981277.1 (Ovis aries musimon: 99.3% identity in aln 100.0% length of target) | XP_013830926.1 (Capra hircus: 99.3% identity in aln 93.2% length of target) | XP_005226157.1 (Bos taurus: 99.3% identity in aln 100.0% length of target) | XP_006188452.1 (Camelus ferus: 98.2% identity in aln 100.0% length of target) | XP_015104118.1 (Vicugna pacos: 98.6% identity in aln 100.0% length of target) |…	61	6	9.8	68	6	91.8	voltage-dependent anion-selective channel protein 3	voltage-dependent anion-selective channel protein 3 isoform 1 | voltage dependent anion channel | voltage-dependent anion-selective channel protein 3 isoform 2	.	.	.	.	.
ENSOARG00000003420	ENSOARP00000003645	0	.	COA6	cytochrome c oxidase assembly factor 6	1	.	NP_001193571.1 (Bos taurus: 97.5% identity in aln 100.0% length of target) | XP_006069428.1 (Bubalus bubalis: 98.7% identity in aln 100.0% length of target) | XP_006212417.1 (Vicugna pacos: 92.4% identity in aln 100.0% length of target) | XP_005961102.1 (Pantholops hodgsonii: 97.5% identity in aln 100.0% length of target)	26	8	30.8	26	5	100	cytochrome c oxidase assembly factor 6 homolog	.	1	0,+1	ENSOARG00000003510/RIDA	POP1,NIPAL2	.
ENSOARG00000003457	ENSOARP00000003688	0	.	POP1	POP1 homolog, ribonuclease P/MRP subunit	4	.	.	12	7	58.3	9	6	100	ribonucleases P/MRP protein subunit POP1	.	0	0	.	.	ENSOARG00000008773/SLC31A1
ENSOARG00000003464	ENSOARP00000003695	1	ENSOARG00000006332	CDC26	cell division cycle 26	1	NP_644815.1 (92.9% identity in aln 100.0% length of target)	NP_001071621.1 (Bos taurus: 98.8% identity in aln 100.0% length of target) | XP_006195070.1 (Camelus ferus: 95.3% identity in aln 100.0% length of target) | XP_005976137.1 (Pantholops hodgsonii: 97.6% identity in aln 100.0% length of target)	79	5	6.3	74	4	96.2	anaphase-promoting complex subunit CDC26	Anaphase-promoting complex subunit CDC26 | Chain G, Atomic Structure Of The Human Anaphase-promoting Complex | anaphase-promoting complex subunit CDC26-like	0	0	.	.	.
ENSOARG00000003480	ENSOARP00000003711	6	ENSOARG00000005024, ENSOARG00000005934, ENSOARG00000008109, ENSOARG00000014076, ENSOARG00000014324, ENSOARG00000019540	RPL23A	ribosomal protein L23a	1	NP_000975.2 (100.0% identity in aln 100.0% length of target)	XP_014964041.1 (Ovis aries musimon: 96.2% identity in aln 98.7% length of target) | XP_005675880.1 (Capra hircus: 100.0% identity in aln 98.7% length of target) | XP_014337154.1 (Bos mutus: 99.4% identity in aln 100.0% length of target) | XP_006042239.1 (Bubalus bubalis: 97.4% identity in aln 91.8% length of target) | XP_006185001.1 (Camelus ferus: 96.8% identity in aln 100.0% length of target)	105	13	12.4	96	6	75.2	60S ribosomal protein L23a	60S ribosomal protein L23a-like | Rpl23a protein | mCG1034428 | hCG2001000 | ribosomal protein L23a (predicted) | ribosomal protein L23a Y-linked protein | hCG16001, isoform CRA_b | ribosomal protein L23a, isoform CRA_a | COX assembly mitochondrial protein homolog | homology to rat ribosomal protein L23 | hCG16001, isoform CRA_a | 60S ribosomal protein L23a-like isoform 1	.	.	.	.	.
ENSOARG00000003488	ENSOARP00000003723	0	.	RPS24	ribosomal protein S24	5	.	.	8	0	0	42	0	100	40S ribosomal protein S24	.	.	.	.	.	.
ENSOARG00000003505	ENSOARP00000003740	1	ENSOARG00000003555	TRIM64	tripartite motif containing 64	1	.	XP_012028726.1 (Ovis aries musimon: 97.098% identity in aln 100.0% length of target)XP_012028726.1 (Ovis aries musimon: 97.1% identity in aln 100.0% length of target)	1	1	100	0	1	100	tripartite motif-containing protein 64-like	.	.	.	.	.	.
ENSOARG00000003509	ENSOARP00000003749	0	.	RUFY1	RUN and FYVE domain-containing protein 1	8	.	.	0	0	0	0	0	0	.	.	.	.	.	.	.
ENSOARG00000003544	ENSOARP00000003781	0	.	COG8	component of oligomeric golgi complex 8	2	.	XP_011966052.1 (Ovis aries musimon: 100.0% identity in aln 82.2% length of target) | XP_013826763.1 (Capra hircus: 99.4% identity in aln 82.2% length of target) | XP_005896570.1 (Bos mutus: 99.6% identity in aln 81.8% length of target) | NP_001070535.1 (Bos taurus: 99.4% identity in aln 81.8% length of target) | XP_006047687.1 (Bubalus bubalis: 99.4% identity in aln 81.8% length of target) | XP_0…	17	7	41.2	14	6	94.1	conserved oligomeric Golgi complex subunit 8	Conserved oligomeric Golgi complex subunit 8	.	.	.	.	.
ENSOARG00000003552	ENSOARP00000003790	0	.	TMED6	transmembrane p24 trafficking protein 6	1	.	XP_011966044.1 (Ovis aries musimon: 99.6% identity in aln 100.0% length of target) | XP_005692245.1 (Capra hircus: 98.3% identity in aln 100.0% length of target) | XP_014333953.1 (Bos mutus: 97.1% identity in aln 97.2% length of target) | XP_006047683.1 (Bubalus bubalis: 96.2% identity in aln 100.0% length of target) | XP_010849256.1 (Bison bison bison: 96.7% identity in aln 100.0% length of targ…	10	8	80	6	6	80	transmembrane emp24 domain-containing protein 6	Transmembrane emp24 domain-containing protein 6 | transmembrane emp24 domain-containing protein 6 precursor	.	.	.	.	.
ENSOARG00000003553	ENSOARP00000003791	3	ENSOARG00000004133, ENSOARG00000017399, ENSOARG00000021035	NPM1	nucleophosmin	1	.	XP_013828152.1 (Capra hircus: 94.4% identity in aln 91.0% length of target) | XP_005892341.1 (Bos mutus: 95.6% identity in aln 99.7% length of target) | NP_001030518.1 (Bos taurus: 95.2% identity in aln 99.7% length of target)	35	4	11.4	33	3	100	nucleophosmin	.	.	.	.	.	.
ENSOARG00000003555	ENSOARP00000003795	1	ENSOARG00000003505	TRIM64	tripartite motif containing 64	1	.	XP_012020397.1 (Ovis aries musimon: 97.124% identity in aln 100.0% length of target)XP_012020397.1 (Ovis aries musimon: 97.1% identity in aln 100.0% length of target) | XP_005701480.1 (Capra hircus: 94.9% identity in aln 100.0% length of target) | XP_006055377.1 (Bubalus bubalis: 90.5% identity in aln 100.0% length of target) | XP_005970136.1 (Pantholops hodgsonii: 93.1% identity in aln 100.0% le…	4	4	100	3	4	100	tripartite motif-containing protein 64-like	.	0	0	.	.	.
ENSOARG00000003558	ENSOARP00000003794	0	.	NIP7	NIP7, nucleolar pre-rRNA processing protein	1	.	NP_001179168.1 (Bos taurus: 99.4% identity in aln 100.0% length of target)	74	2	2.7	85	2	87.8	60S ribosome subunit biogenesis protein NIP7 homolog	KD93 | 60S ribosome subunit biogenesis protein NIP7 homolog isoform 1 | 60S ribosome subunit biogenesis protein NIP7-like | Chain A, Crystal Structure Of Northeast Structural Genomics Consortium Target Hr2118: A Human Homolog Of Saccharomyces Cerevisiae Nip7p | Chain A, Crystal Structure Of Kd93, A Novel Protein Expressed In The Human Pro	.	.	.	.	.
ENSOARG00000003563	ENSOARP00000003800	0	.	IER3IP1	immediate early response 3 interacting protein 1	1	.	XP_014413937.1 (Camelus ferus: 98.1% identity in aln 94.5% length of target)	23	1	4.3	60	1	91.3	immediate early response 3-interacting protein 1	immediate early response 3-interacting protein 1 precursor	.	.	.	.	.
ENSOARG00000003579	ENSOARP00000003820	0	.	EFNA3	ephrin A3	1	.	XP_005898823.1 (Bos mutus: 99.5% identity in aln 100.0% length of target) | XP_006060965.1 (Bubalus bubalis: 99.6% identity in aln 100.0% length of target)	37	4	10.8	46	3	94.6	ephrin-A3	ephrin-A3 precursor	0	0	.	.	.
ENSOARG00000003655	ENSOARP00000003898	0	.	TIMM17A	translocase of inner mitochondrial membrane 17 homolog A (yeast)	8	.	.	0	0	0	0	0	0	.	.	.	.	.	.	.
ENSOARG00000003683	ENSOARP00000003930	0	.	NDUFA7	NADH:ubiquinone oxidoreductase subunit A7	1	.	XP_013820666.1 (Capra hircus: 98.2% identity in aln 100.0% length of target) | NP_788831.1 (Bos taurus: 96.5% identity in aln 100.0% length of target) | XP_005959060.1 (Pantholops hodgsonii: 96.5% identity in aln 100.0% length of target)	5	4	80	6	4	100	NADH dehydrogenase [ubiquinone] 1 alpha subcomplex subunit 7	.	.	.	.	.	.
ENSOARG00000003684	ENSOARP00000003931	0	.	NPYR4	NPYR4	1	.	XP_012007975.1 (Ovis aries musimon: 99.7% identity in aln 100.0% length of target) | XP_005702226.1 (Capra hircus: 97.9% identity in aln 100.0% length of target) | XP_005910053.1 (Bos mutus: 93.6% identity in aln 100.0% length of target) | NP_001192508.1 (Bos taurus: 94.4% identity in aln 100.0% length of target) | XP_006066851.1 (Bubalus bubalis: 95.0% identity in aln 100.0% length of target) | …	9	7	77.8	8	6	100	neuropeptide Y receptor type 4	.	10	-8,+2	.	TERF2,CYB5B,NFAT5,NQO1,NOB1,WWP2,PSMD7,ZFHX3,PMFBP1,DHX38,TXNL4B	ENSOARG00000003744/ENSBTAG00000006354
ENSOARG00000003692	ENSOARP00000003954	0	.	PMFBP1	polyamine-modulated factor 1-binding protein 1	8	.	.	0	0	0	0	0	0	.	.	0	0	.	.	ENSOARG00000003759/ENSBTAG00000039523
ENSOARG00000003770	ENSOARP00000004018	0	.	ZNF850	zinc finger protein 850	1	.	XP_006067307.1 (Bubalus bubalis: 97.792% identity in aln 95.7% length of target)XP_006067308.1 (Bubalus bubalis: 97.8% identity in aln 100.0% length of target)	2	2	100	1	1	100	zinc finger protein 850-like	.	.	.	.	.	.
ENSOARG00000003772	ENSOARP00000004025	1	ENSOARG00000007599	FSBP	fibrinogen silencer binding protein	1	.	XP_006192046.1 (Camelus ferus: 91.5% identity in aln 92.6% length of target)	45	7	15.6	50	7	88.9	fibrinogen silencer-binding protein	Fibrinogen silencer-binding protein | DNA repair and recombination protein RAD54B | DNA repair and recombination protein RAD54B-like	1	0,+1	.	AADAC,SUCNR1	ENSOARG00000015222/MBNL1
ENSOARG00000003776	ENSOARP00000004031	1	.	AADAC	AADAC	1	.	XP_012002558.1 (Ovis aries musimon: 99.0% identity in aln 100.0% length of target) | XP_005910169.1 (Bos mutus: 94.0% identity in aln 100.0% length of target) | NP_001069259.1 (Bos taurus: 93.5% identity in aln 100.0% length of target) | XP_006075683.1 (Bubalus bubalis: 93.2% identity in aln 100.0% length of target) | XP_010833693.1 (Bison bison bison: 93.5% identity in aln 100.0% length of targe…	6	6	100	4	5	100	arylacetamide deacetylase	.	0	0	.	.	ENSOARG00000003789/ENSBTAG00000039523
ENSOARG00000003780	ENSOARP00000004032	0	.	ZNF850	zinc finger protein 850	8	.	.	0	0	0	0	0	0	.	.	.	.	.	.	.
ENSOARG00000003832	ENSOARP00000004089	1	.	RPL10A	RPL10A	1	.	XP_014962047.1 (Ovis aries musimon: 96.8% identity in aln 100.0% length of target) | XP_005979789.1 (Pantholops hodgsonii: 92.2% identity in aln 100.0% length of target)	110	4	3.6	134	3	79.1	60S ribosomal protein L10a	60S ribosomal protein L10a-like | ribosomal protein L10a | 60S ribosomal protein L10a-like protein | Rpl10a protein | Csa-19 | Unknown (protein for IMAGE:7620550) | RecName: Full=60S ribosomal protein L10a; AltName: Full=CSA-19; AltName: Full=Neural precursor cell expressed developmentally down-regulated protein 6; Short=NEDD-6 | hCG1787790 | 60S ribosomal protein L10a isoform C | Fanconi anemia …	.	.	.	.	.
ENSOARG00000003884	ENSOARP00000004149	0	.	NCR3LG1	natural killer cell cytotoxicity receptor 3 ligand 1	3	.	XP_011992312.1 (Ovis aries musimon: 97.3% identity in aln 58.2% length of target) | XP_005689637.1 (Capra hircus: 96.9% identity in aln 55.6% length of target) | XP_006041254.1 (Bubalus bubalis: 91.6% identity in aln 73.1% length of target) | XP_010828830.1 (Bison bison bison: 90.2% identity in aln 62.7% length of target)	7	6	85.7	4	4	85.7	natural cytotoxicity triggering receptor 3 ligand 1	Putative Ig-like domain-containing protein DKFZp686O24166/DKFZp686I21167-like protein	7	-1,+6	ENSOARG00000004296/KCNK9	TRAPPC9,CHRAC1,AGO2,PTK2,DENND3,SLC45A4,GPR20,PTP4A3	.
ENSOARG00000003886	ENSOARP00000004151	0	.	CHRAC1	chromatin accessibility complex protein 1	6	.	XP_004011673.1 (Ovis aries: 100.000% identity in aln 100.0% length of target)	4	4	100	3	4	75	chromatin accessibility complex protein 1	.	.	.	.	.	.
ENSOARG00000003902	ENSOARP00000004166	2	ENSOARG00000000798, ENSOARG00000017473	HIGD1A	HIG1 hypoxia inducible domain family member 1A	1	.	XP_013828899.1 (Capra hircus: 98.9% identity in aln 100.0% length of target) | XP_005901855.1 (Bos mutus: 98.9% identity in aln 100.0% length of target) | NP_001070582.1 (Bos taurus: 98.9% identity in aln 100.0% length of target) | XP_006181396.1 (Camelus ferus: 92.5% identity in aln 100.0% length of target) | XP_006200754.1 (Vicugna pacos: 91.4% identity in aln 100.0% length of target) | XP_0059…	51	14	27.5	39	6	82.4	HIG1 domain family member 1A, mitochondrial	HIG1 domain family member 1A, mitochondrial-like | HIG1 domain family member 1A	.	.	.	.	.
ENSOARG00000003909	ENSOARP00000004173	0	.	ZBTB45	zinc finger and BTB domain containing 45	4	.	.	58	4	6.9	46	4	98.3	zinc finger and BTB domain-containing protein 45	Zinc finger and BTB domain-containing protein 45	5	-2,+3	ENSOARG00000010530/TMEM200C	ARHGAP28,LAMA1,LRRC30,PTPRM,RAB12,MTCL1	ENSOARG00000000891/NDUFV2
ENSOARG00000003939	ENSOARP00000004203	0	.	LRRC30	leucine rich repeat containing 30	3	.	XP_011974132.1 (Ovis aries musimon: 98.3% identity in aln 58.8% length of target) | XP_005697184.1 (Capra hircus: 98.3% identity in aln 58.8% length of target) | NP_001095980.2 (Bos taurus: 97.2% identity in aln 58.8% length of target) | XP_006045046.1 (Bubalus bubalis: 97.2% identity in aln 73.1% length of target) | XP_010857392.1 (Bison bison bison: 97.2% identity in aln 58.8% length of target)	9	6	66.7	8	5	88.9	leucine-rich repeat-containing protein 30	MGC160046 protein	0	0	.	.	ENSOARG00000007739/AASDH
ENSOARG00000003953	ENSOARP00000004222	0	.	PPAT	phosphoribosyl pyrophosphate amidotransferase	1	.	XP_012008975.1 (Ovis aries musimon: 99.8% identity in aln 100.0% length of target) | XP_006177389.1 (Camelus ferus: 96.3% identity in aln 100.0% length of target) | XP_006198211.1 (Vicugna pacos: 96.3% identity in aln 100.0% length of target)	8	3	37.5	6	3	100	amidophosphoribosyltransferase	.	13	-2,+11	.	KLHDC8A,LEMD1,CDK18,MFSD4A,ELK4,SLC45A3,NUCKS1,RAB29,SLC41A1,PM20D1,SLC26A9,RAB7B,C1orf186,AVPR1B	.
ENSOARG00000003960	ENSOARP00000004229	0	.	CDK18	cyclin dependent kinase 18	3	.	XP_011991050.1 (Ovis aries musimon: 99.2% identity in aln 51.2% length of target) | XP_013825498.1 (Capra hircus: 99.2% identity in aln 51.2% length of target) | NP_001076942.1 (Bos taurus: 97.9% identity in aln 51.2% length of target) | XP_006062321.1 (Bubalus bubalis: 97.9% identity in aln 51.2% length of target) | XP_010852471.1 (Bison bison bison: 95.4% identity in aln 51.2% length of target)…	60	7	11.7	36	7	93.3	cyclin-dependent kinase 18	Serine/threonine-protein kinase PCTAIRE-3 | cyclin-dependent kinase 18-like protein | cyclin-dependent kinase 18-like | Cyclin-dependent kinase 18	.	.	.	.	.
ENSOARG00000003975	ENSOARP00000004248	0	.	EVI2A	ecotropic viral integration site 2A	1	.	XP_011970078.1 (Ovis aries musimon: 99.6% identity in aln 100.0% length of target) | XP_005693294.1 (Capra hircus: 98.3% identity in aln 100.0% length of target) | XP_005896739.1 (Bos mutus: 94.0% identity in aln 100.0% length of target) | XP_006053598.1 (Bubalus bubalis: 94.4% identity in aln 100.0% length of target) | XP_010859751.1 (Bison bison bison: 94.4% identity in aln 100.0% length of tar…	7	7	100	5	6	85.7	protein EVI2A	protein EVI2A precursor	.	.	.	.	.
ENSOARG00000004001	ENSOARP00000004271	1	ENSOARG00000004009	TIM14	TIM14	1	.	XP_005675277.1 (Capra hircus: 91.4% identity in aln 100.0% length of target) | NP_001029630.1 (Bos taurus: 90.5% identity in aln 100.0% length of target) | XP_005982491.1 (Pantholops hodgsonii: 92.2% identity in aln 100.0% length of target)	6	3	50	12	3	100	mitochondrial import inner membrane translocase subunit TIM14	.	.	.	.	.	.
ENSOARG00000004004	ENSOARP00000004274	1	ENSOARG00000016660	ANAPC15	anaphase promoting complex subunit 15	1	.	XP_014944391.1 (Ovis aries musimon: 94.7% identity in aln 97.8% length of target) | NP_001029415.1 (Bos taurus: 100.0% identity in aln 100.0% length of target)	62	4	6.5	100	3	88.7	anaphase-promoting complex subunit 15	anaphase-promoting complex subunit 15 isoform c | mCG1038848 | anaphase-promoting complex subunit 15 isoform a | anaphase-promoting complex subunit 15-like | anaphase-promoting complex subunit 15 isoform b | anaphase-promoting complex subunit 15 isoform 4 | Chain D, Atomic Structure Of The Human Anaphase-promoting Complex	.	.	.	.	.
ENSOARG00000004009	ENSOARP00000004282	1	ENSOARG00000004001	TIM14	TIM14	1	.	XP_005675277.1 (Capra hircus: 91.4% identity in aln 100.0% length of target) | NP_001029630.1 (Bos taurus: 90.5% identity in aln 100.0% length of target) | XP_005982491.1 (Pantholops hodgsonii: 92.2% identity in aln 100.0% length of target)	6	3	50	12	3	100	mitochondrial import inner membrane translocase subunit TIM14	.	1	-1,0	.	DNMT3B,COMMD7	ENSOARG00000003880/NOL4L
ENSOARG00000004020	ENSOARP00000004294	1	ENSOARG00000009365	COMMD7	COMM domain containing 7	1	.	XP_012007067.1 (Ovis aries musimon: 100.0% identity in aln 100.0% length of target) | NP_001030368.1 (Bos taurus: 98.0% identity in aln 100.0% length of target) | XP_006064463.1 (Bubalus bubalis: 98.5% identity in aln 100.0% length of target)	46	5	10.9	45	4	87	COMM domain-containing protein 7	COMM domain-containing protein 7 isoform 1 | COMM domain containing 7, isoform CRA_b | Commd7 protein | COMM domain-containing protein 7-like	7	-4,+3	ENSOARG00000011431/GLOD4	MRM3,NXN,TIMM22,ABR,BHLHA9,TUSC5,GOSR1,CPD	.
ENSOARG00000004029	ENSOARP00000004299	0	.	BHLHA9	basic helix-loop-helix family member a9	3	.	XP_013827313.1 (Capra hircus: 98.6% identity in aln 69.2% length of target)	6	5	83.3	4	4	83.3	class A basic helix-loop-helix protein 9	Class A basic helix-loop-helix protein 9	7	-3,+4	ENSOARG00000003958/NEURL1B	DUSP1,ERGIC1,RPL26L1,ATP6V0E1,CREBRF,BNIP1,NKX2-5,STC2	.
ENSOARG00000004031	ENSOARP00000004306	0	.	ATP6V0E1	ATPase H+ transporting V0 subunit e1	1	NP_003936.1 (97.5% identity in aln 100.0% length of target)	NP_001029222.1 (Bos taurus: 100.0% identity in aln 100.0% length of target)	39	1	2.6	70	1	92.3	V-type proton ATPase subunit e 1	V-type proton ATPase subunit e 1-like | RecName: Full=V-type proton ATPase subunit e 1; Short=V-ATPase subunit e 1; AltName: Full=V-ATPase 9.2 kDa membrane accessory protein; AltName: Full=V-ATPase M9.2 subunit; AltName: Full=Vacuolar proton pump subunit e 1	.	.	.	.	.
ENSOARG00000004035	ENSOARP00000004311	0	.	DBIL5	DBIL5	1	.	NP_847892.1 (Bos taurus: 100.0% identity in aln 100.0% length of target) | XP_006185041.1 (Camelus ferus: 95.4% identity in aln 100.0% length of target)	11	5	45.5	13	3	81.8	diazepam-binding inhibitor-like 5	Diazepam-binding inhibitor-like 5 | diazepam-binding inhibitor-like 5-like	0	0	.	.	ENSOARG00000004011/ADGRF3
ENSOARG00000004046	ENSOARP00000004323	1	.	HADHB	HADHB	1	.	XP_011976342.1 (Ovis aries musimon: 100.0% identity in aln 98.7% length of target) | XP_013829853.1 (Capra hircus: 98.2% identity in aln 94.9% length of target) | XP_014333701.1 (Bos mutus: 97.7% identity in aln 94.7% length of target) | NP_001030419.1 (Bos taurus: 97.7% identity in aln 98.7% length of target) | XP_006205857.1 (Vicugna pacos: 90.6% identity in aln 98.7% length of target) | XP_005…	13	6	46.2	11	5	92.3	3-ketoacyl-CoA thiolase, mitochondrial	acetyl-CoA acyltransferase 2	.	.	.	.	.
ENSOARG00000004056	ENSOARP00000004332	0	.	TIGD1	tigger transposable element derived 1	8	.	.	0	0	0	0	0	0	.	.	3	-1,+2	ENSOARG00000006183/ENSBTAG00000035021	ANGPT2,MCPH1,AGPAT5,XKR5	ENSOARG00000006355/ENSBTAG00000008519
ENSOARG00000004065	ENSOARP00000004343	0	.	MCPH1	microcephalin 1	4	.	.	16	14	87.5	4	5	93.8	microcephalin	MCPH1 protein	.	.	.	.	.
ENSOARG00000004080	ENSOARP00000004359	2	ENSOARG00000004093, ENSOARG00000004105	OR1A1	olfactory receptor family 1 subfamily A member 1	1	.	XP_012006550.1 (Ovis aries musimon: 98.1% identity in aln 99.7% length of target) | XP_005693449.1 (Capra hircus: 90.3% identity in aln 100.0% length of target) | XP_014332306.1 (Bos mutus: 93.4% identity in aln 99.7% length of target) | XP_006079861.1 (Bubalus bubalis: 91.0% identity in aln 99.7% length of target) | XP_010859960.1 (Bison bison bison: 90.0% identity in aln 100.0% length of target…	21	10	47.6	15	6	100	olfactory receptor 1A1	.	.	.	.	.	.
ENSOARG00000004092	ENSOARP00000004371	1	ENSOARG00000004101	CLDN22	claudin 22	1	.	XP_014961631.1 (Ovis aries musimon: 98.6% identity in aln 99.5% length of target) | XP_005698807.2 (Capra hircus: 97.7% identity in aln 100.0% length of target) | XP_006075198.1 (Bubalus bubalis: 95.5% identity in aln 100.0% length of target) | XP_010834118.1 (Bison bison bison: 94.5% identity in aln 100.0% length of target) | XP_005972676.1 (Pantholops hodgsonii: 98.2% identity in aln 99.5% leng…	5	5	100	4	5	100	claudin-22	.	.	.	.	.	.
ENSOARG00000004093	ENSOARP00000004373	2	ENSOARG00000004080, ENSOARG00000004105	OR1A1	olfactory receptor family 1 subfamily A member 1	1	.	XP_012006551.1 (Ovis aries musimon: 98.7% identity in aln 99.7% length of target) | XP_005693448.1 (Capra hircus: 94.5% identity in aln 99.7% length of target) | XP_014332306.1 (Bos mutus: 90.6% identity in aln 99.7% length of target) | XP_006079861.1 (Bubalus bubalis: 90.0% identity in aln 99.7% length of target) | XP_010859962.1 (Bison bison bison: 90.0% identity in aln 99.7% length of target) …	18	11	61.1	9	6	100	olfactory receptor 1A1	.	.	.	.	.	.
ENSOARG00000004097	ENSOARP00000004381	0	.	ASB3	ankyrin repeat and SOCS box protein 3	8	.	.	0	0	0	0	0	0	.	.	.	.	.	.	.
ENSOARG00000004101	ENSOARP00000004382	1	ENSOARG00000004092	CLDN22	claudin 22	1	.	XP_014961631.1 (Ovis aries musimon: 90.323% identity in aln 98.2% length of target)XP_014961631.1 (Ovis aries musimon: 90.3% identity in aln 98.2% length of target)	1	1	100	0	1	100	claudin-22	.	.	.	.	.	.
ENSOARG00000004105	ENSOARP00000004385	2	ENSOARG00000004080, ENSOARG00000004093	OR1A1	olfactory receptor family 1 subfamily A member 1	1	.	XP_012006552.1 (Ovis aries musimon: 97.7% identity in aln 100.0% length of target) | XP_005693449.1 (Capra hircus: 98.1% identity in aln 100.0% length of target) | XP_014332306.1 (Bos mutus: 90.6% identity in aln 99.7% length of target) | XP_006079861.1 (Bubalus bubalis: 95.5% identity in aln 99.0% length of target) | XP_010859960.1 (Bison bison bison: 96.4% identity in aln 100.0% length of targe…	22	12	54.5	11	6	100	olfactory receptor 1A1	.	0	0	ENSOARG00000004108/PPP2R2A	.	ENSOARG00000004148/PNMA2
ENSOARG00000004115	ENSOARP00000004397	0	.	BNIP3L	BCL2 interacting protein 3 like	8	.	.	0	0	0	0	0	0	.	.	0	0	.	.	.
ENSOARG00000004142	ENSOARP00000004424	0	.	PHPT1	phosphohistidine phosphatase 1	1	.	XP_006172781.2 (Camelus ferus: 93.1% identity in aln 93.5% length of target)	74	7	9.5	56	6	98.6	14 kDa phosphohistidine phosphatase	RecName: Full=14 kDa phosphohistidine phosphatase; AltName: Full=Phosphohistidine phosphatase 1; AltName: Full=Protein histidine phosphatase; Short=PHP	0	0	.	.	.
ENSOARG00000004150	ENSOARP00000004432	1	.	OR10T2	OR10T2	1	.	XP_014945986.1 (Ovis aries musimon: 99.7% identity in aln 90.8% length of target) | XP_010804949.1 (Bos taurus: 98.7% identity in aln 94.1% length of target)	6	6	100	4	5	100	olfactory receptor 10T2	.	6	-1,+5	.	GLTSCR1L,RPL7L1,PTCRA,CNPY3,GNMT,PEX6,PPP2R5D	.
ENSOARG00000004164	ENSOARP00000004454	1	ENSOARG00000009070	RPL7L1	ribosomal protein L7 like 1	1	.	XP_012020094.1 (Ovis aries musimon: 99.2% identity in aln 100.0% length of target) | XP_005696374.1 (Capra hircus: 98.8% identity in aln 100.0% length of target) | XP_005900192.2 (Bos mutus: 98.0% identity in aln 96.5% length of target) | NP_001193230.1 (Bos taurus: 98.0% identity in aln 100.0% length of target) | XP_006069276.1 (Bubalus bubalis: 98.0% identity in aln 96.5% length of target) | XP…	21	10	47.6	13	7	95.2	60S ribosomal protein L7-like 1	60S ribosomal protein L7-like 1-like	.	.	.	.	.
ENSOARG00000004180	ENSOARP00000004471	0	.	DTMT	DTMT	1	.	XP_014964316.1 (Ovis aries musimon: 98.4% identity in aln 99.7% length of target) | XP_005693457.1 (Capra hircus: 96.5% identity in aln 99.7% length of target) | XP_005911514.1 (Bos mutus: 95.9% identity in aln 99.4% length of target) | XP_015314081.1 (Bos taurus: 95.2% identity in aln 99.4% length of target) | XP_010845819.1 (Bison bison bison: 96.5% identity in aln 99.4% length of target) | XP_…	8	7	87.5	5	6	87.5	olfactory receptor-like protein DTMT	olfactory receptor-like protein DTMT-like	3	-2,+1	ENSOARG00000004132/ENSBTAG00000003856	ZNF507,DPY19L3,PDCD5,ANKRD27	.
ENSOARG00000004181	ENSOARP00000004474	1	ENSOARG00000005893	PDCD5	programmed cell death 5	1	NP_004699.1 (94.4% identity in aln 100.0% length of target)	NP_001039489.1 (Bos taurus: 99.2% identity in aln 100.0% length of target) | XP_006212260.1 (Vicugna pacos: 98.4% identity in aln 100.0% length of target) | XP_005958319.1 (Pantholops hodgsonii: 98.4% identity in aln 100.0% length of target)	42	5	11.9	57	3	81	programmed cell death protein 5	programmed cell death protein 5-like | Programmed cell death protein 5 | Homo sapiens PDCD5	.	.	.	.	.
ENSOARG00000004185	ENSOARP00000004477	0	.	PAICS	phosphoribosylaminoimidazole carboxylase; phosphoribosylaminoimidazolesuccinocarboxamide synthase	8	.	.	0	0	0	0	0	0	.	.	4	-4,0	ENSOARG00000003387/ENSBTAG00000010020	ZNF346,FGFR4,NSD1,RAB24,PRELID1	ENSOARG00000004235/MXD3
ENSOARG00000004188	ENSOARP00000004481	2	ENSOARG00000006021, ENSOARG00000017854	PRELID1	PRELI domain containing 1	1	.	XP_005682809.1 (Capra hircus: 99.5% identity in aln 100.0% length of target) | XP_006183946.1 (Camelus ferus: 97.7% identity in aln 100.0% length of target) | XP_006199004.1 (Vicugna pacos: 98.2% identity in aln 100.0% length of target)	57	4	7	73	4	87.7	PRELI domain-containing protein 1, mitochondrial	PRELI domain-containing protein 1, mitochondrial-like | PRELI domain-containing protein 1, mitochondrial precursor | PRELI domain-containing protein 1, mitochondrial isoform 1 precursor | PRELI | PRELI domain-containing protein 1, mitochondrial-like isoform 1	.	.	.	.	.
ENSOARG00000004191	ENSOARP00000004482	0	.	DTMT	DTMT	6	.	XP_012002236.1 (Ovis aries musimon: 93.312% identity in aln 100.0% length of target)	15	13	86.7	5	6	46.7	olfactory receptor-like protein DTMT	.	.	.	.	.	.
ENSOARG00000004192	ENSOARP00000004483	0	.	BOD1	biorientation of chromosomes in cell division 1	2	.	XP_010851908.1 (Bison bison bison: 100.0% identity in aln 79.1% length of target)	82	9	11	71	8	76.8	biorientation of chromosomes in cell division protein 1	biorientation of chromosomes in cell division protein 1-like | Biorientation of chromosomes in cell division protein 1 | 2310022M17Rik protein | RIKEN cDNA 2310022M17 | RecName: Full=Biorientation of chromosomes in cell division protein 1; AltName: Full=Biorientation defective protein 1; AltName: Full=Protein FAM44B | biorientation of chromosomes in cell division protein 1 isoform a	2	0,+2	.	ZNF703,ERLIN2,PROSC	ENSOARG00000000922/ADGRA2
ENSOARG00000004193	ENSOARP00000004484	0	.	ZNF703	zinc finger protein 703	4	.	.	6	4	66.7	5	4	100	zinc finger protein 703	.	.	.	.	.	.
ENSOARG00000004221	ENSOARP00000004509	0	.	DTMT	DTMT	6	.	XP_012002242.1 (Ovis aries musimon: 94.904% identity in aln 100.0% length of target)	16	16	100	5	6	56.2	olfactory receptor-like protein DTMT	.	2	-1,+1	ENSOARG00000003904/ENSBTAG00000021109	CNST,TFB2M,SMYD3	.
ENSOARG00000004242	ENSOARP00000004536	0	.	TFB2M	dimethyladenosine transferase 2, mitochondrial	8	.	.	0	0	0	0	0	0	.	.	7	-7,0	ENSOARG00000004260/ENSBTAG00000013906	SCIMP,RABEP1,NUP88,RPAIN,C1QBP,DHX33,DERL2,MIS12	ENSOARG00000004247/ENSBTAG00000025126
ENSOARG00000004258	ENSOARP00000004557	1	ENSOARG00000013454	MIS12	MIS12, kinetochore complex component	1	.	XP_012023559.1 (Ovis aries musimon: 94.2% identity in aln 100.0% length of target) | XP_005693491.1 (Capra hircus: 99.0% identity in aln 100.0% length of target) | NP_001070437.1 (Bos taurus: 97.1% identity in aln 100.0% length of target) | XP_006060092.1 (Bubalus bubalis: 96.6% identity in aln 100.0% length of target) | XP_005968021.1 (Pantholops hodgsonii: 98.5% identity in aln 100.0% length of…	19	6	31.6	15	5	94.7	protein MIS12 homolog	Protein MIS12 like protein	30	-2,+28	.	PEX14,CASZ1,TARDBP,MASP2,SRM,EXOSC10,MTOR,ANGPTL7,UBIAD1,DISP3,FBXO2,FBXO44,FBXO6,MAD2L2,DRAXIN,AGTRAP,C1orf167,MTHFR,CLCN6,NPPA,NPPB,KIAA2013,PLOD1,MFN2,MIIP,TNFRSF8,TNFRSF1B,VPS13D,DHRS3,TNFSF4,TNFSF18	.
ENSOARG00000004268	ENSOARP00000004569	0	.	TARDBP	TAR DNA binding protein	8	.	.	0	0	0	0	0	0	.	.	5	-5,0	.	P2RY13,GPR87,P2RY14,GPR171,MED12L,CLRN1	ENSOARG00000004317/MINDY4B
ENSOARG00000004273	ENSOARP00000004574	0	.	CLRN1	clarin 1	1	.	XP_005675503.1 (Capra hircus: 99.1% identity in aln 100.0% length of target) | XP_005904854.1 (Bos mutus: 97.0% identity in aln 100.0% length of target) | NP_001179030.1 (Bos taurus: 97.0% identity in aln 100.0% length of target) | XP_006048593.1 (Bubalus bubalis: 97.8% identity in aln 100.0% length of target) | XP_010833664.1 (Bison bison bison: 97.0% identity in aln 100.0% length of target) | X…	76	9	11.8	67	8	88.2	clarin-1	CLRN1 | clarin-1-like | RecName: Full=Clarin-1; AltName: Full=Usher syndrome type-3 protein homolog | clarin-1 isoform 1 | clarin-1 isoform a	3	-2,+1	.	PLCE1,NOC3L,TBC1D12,HELLS	ENSOARG00000004828/CYP2C18
ENSOARG00000004278	ENSOARP00000004581	0	.	TBC1D12	TBC1 domain family member 12	1	XP_011537860.1 (97.8% identity in aln 95.6% length of target)	XP_010840465.1 (Bison bison bison: 98.5% identity in aln 98.1% length of target)	83	5	6	72	5	94	TBC1 domain family member 12	TBC1 domain family member 12-like | RecName: Full=TBC1D12: TBC1 domain family, member 12 | mKIAA0608 protein	0	0	.	.	ENSOARG00000005796/SLC8A3
ENSOARG00000004290	ENSOARP00000004591	1	ENSOARG00000021192	SYNJ2BP	synaptojanin 2 binding protein	1	NP_060843.2 (93.1% identity in aln 100.0% length of target)	NP_001030432.1 (Bos taurus: 95.9% identity in aln 100.0% length of target) | XP_006056194.1 (Bubalus bubalis: 96.6% identity in aln 100.0% length of target)	32	3	9.4	39	3	93.8	synaptojanin-2-binding protein	synaptojanin-2-binding protein-like | SYNJ2BP-COX16 protein isoform 1	.	.	.	.	.
ENSOARG00000004330	ENSOARP00000004633	0	.	NSG2	NSG2	4	.	.	55	2	3.6	78	2	78.2	neuron-specific protein family member 2	neuron-specific protein family member 2-like | neuron-specific protein family member 2-like protein | Neuron-specific protein family member 2 | P19 protein | HMP19 | HMP19 protein, isoform CRA_c | p19 protein	0	0	.	.	.
ENSOARG00000004351	ENSOARP00000004655	0	.	KRT18	keratin, type I cytoskeletal 18	8	.	.	0	0	0	0	0	0	.	.	.	.	.	.	.
ENSOARG00000004385	ENSOARP00000004693	0	.	ZIC5	Zic family member 5	1	.	XP_005687825.2 (Capra hircus: 98.1% identity in aln 96.0% length of target)	6	2	33.3	5	2	100	zinc finger protein ZIC 5	.	2	-2,0	ENSOARG00000003904/ENSBTAG00000021109	CNST,TFB2M,SMYD3	.
ENSOARG00000004388	ENSOARP00000004696	0	.	SMYD3	SET and MYND domain containing 3	4	.	.	17	10	58.8	9	5	100	histone-lysine N-methyltransferase SMYD3	.	.	.	.	.	.
ENSOARG00000004393	ENSOARP00000004699	0	.	RPL9	ribosomal protein L9	8	.	.	0	0	0	0	0	0	.	.	0	0	.	.	.
ENSOARG00000004420	ENSOARP00000004729	0	.	TMED9	transmembrane p24 trafficking protein 9	1	.	XP_006198994.1 (Vicugna pacos: 91.3% identity in aln 92.8% length of target)	61	3	4.9	62	3	80.3	transmembrane emp24 domain-containing protein 9	transmembrane emp24 domain-containing protein 9 precursor | transmembrane emp24 domain-containing protein 9-like | transmembrane emp24 protein transport domain containing 9, isoform CRA_b | p25 | Tmed9 protein | transmembrane emp24 protein transport domain containing 9	.	.	.	.	.
ENSOARG00000004422	ENSOARP00000004732	0	.	SIRPA	signal regulatory protein alpha	4	.	XP_011964571.1 (Ovis aries musimon: 91.150% identity in aln 22.2% length of target)	3	3	100	0	1	100	tyrosine-protein phosphatase non-receptor type substrate 1	.	.	.	.	.	.
ENSOARG00000004430	ENSOARP00000004739	0	.	KCNJ12	ATP-sensitive inward rectifier potassium channel 12	6	.	XP_004012795.1 (Ovis aries: 100.000% identity in aln 100.0% length of target)	17	5	29.4	12	4	70.6	ATP-sensitive inward rectifier potassium channel 12	.	0	0	.	.	ENSOARG00000004445/TTYH2
ENSOARG00000004432	ENSOARP00000004741	0	.	RPL38	60S ribosomal protein L38	8	.	.	0	0	0	0	0	0	.	.	4	-1,+3	.	RSPH3,EZR,SYTL3,DYNLT1,TMEM181	ENSOARG00000004377/ENSBTAG00000045898
ENSOARG00000004438	ENSOARP00000004750	0	.	EZR	ezrin	8	.	.	0	0	0	0	0	0	.	.	0	0	.	.	.
ENSOARG00000004460	ENSOARP00000004769	10	ENSOARG00000000975, ENSOARG00000001105, ENSOARG00000004995, ENSOARG00000006035, ENSOARG00000006818, ENSOARG00000008467, ENSOARG00000015615, ENSOARG00000018407, ENSOARG00000018456, ENSOARG00000019908	RPS15A	ribosomal protein S15a	1	NP_001010.2 (100.0% identity in aln 100.0% length of target)	XP_011984926.1 (Ovis aries musimon: 96.9% identity in aln 100.0% length of target) | XP_005899584.1 (Bos mutus: 99.2% identity in aln 100.0% length of target) | XP_006049511.1 (Bubalus bubalis: 96.2% identity in aln 100.0% length of target) | XP_005965896.1 (Pantholops hodgsonii: 99.2% identity in aln 100.0% length of target)	111	11	9.9	171	4	85.6	40S ribosomal protein S15A	ADP-ribosylation factor-like protein 6-interacting protein 1 | ribosomal protein S15 | 30S ribosomal protein S8 | ribosomal protein rps15a | hCG1994130, isoform CRA_b | 40S ribosomal protein S15 | ribosomal protein S15a, isoform CRA_b | mCG50271 | 40S ribosomal protein S15Aa | Chain a, M48s Late-stage Initiation Complex, Purified From Rabbit Reticulocytes Lysates, Displaying Eif2 Ternary Complex …	0	0	.	.	.
ENSOARG00000004471	ENSOARP00000004779	0	.	UQCRFS1	ubiquinol-cytochrome c reductase, Rieske iron-sulfur polypeptide 1	1	NP_005994.2 (90.1% identity in aln 100.0% length of target)	XP_005691927.2 (Capra hircus: 99.6% identity in aln 100.0% length of target) | XP_005910863.1 (Bos mutus: 99.3% identity in aln 100.0% length of target)	60	4	6.7	53	4	76.7	cytochrome b-c1 complex subunit Rieske, mitochondrial	cytochrome b-c1 complex subunit Rieske, mitochondrial-like | RecName: Full=Cytochrome b-c1 complex subunit Rieske, mitochondrial; AltName: Full=Complex III subunit 5; AltName: Full=Cytochrome b-c1 complex subunit 5; AltName: Full=Rieske iron-sulfur protein; Short=RISP; AltName: Full=Ubiquinol-cytochrome c reductase iron-sulfur subunit; Contains: RecName: Full=Cytochrome b-c1 complex subunit 11; A…	1	0,+1	.	SMYD3,KIF26B	ENSOARG00000004829/ENSBTAG00000047437
ENSOARG00000004482	ENSOARP00000004796	0	.	SMYD3	SET and MYND domain containing 3	7	.	.	4	0	0	3	0	75	histone-lysine N-methyltransferase SMYD3	.	0	0	.	.	.
ENSOARG00000004492	ENSOARP00000004802	2	ENSOARG00000015174, ENSOARG00000021183	ERH	enhancer of rudimentary homolog (Drosophila)	1	NP_004441.1 (97.1% identity in aln 100.0% length of target)	XP_006186493.1 (Camelus ferus: 95.2% identity in aln 100.0% length of target) | XP_005977832.1 (Pantholops hodgsonii: 94.2% identity in aln 100.0% length of target)	77	4	5.2	174	3	80.5	enhancer of rudimentary homolog	Enhancer of rudimentary | Enhancer of rudimentary like protein | Chain A, Crystal Structure Of Enhancer Of Rudimentary Homologue (Erh) | Erh protein | Chain A, Solution Structure Of Mouse Er | enhancer of rudimentary-like protein | Enhancer of rudimentary-like protein | Enhancer of rudimentary homolog | Homo sapiens enhancer of rudimentary homolog (Drosophila)	2	0,+2	ENSOARG00000002579/ENSBTAG00000044137	OTUD1,KIAA1217,ARHGAP21	.
ENSOARG00000004506	ENSOARP00000004817	0	.	OTUD1	OTU deubiquitinase 1	3	NP_001138845.1 (91.0% identity in aln 53.2% length of target)	XP_012015416.1 (Ovis aries musimon: 100.0% identity in aln 53.1% length of target) | XP_005688098.2 (Capra hircus: 99.6% identity in aln 65.8% length of target)	24	2	8.3	19	2	91.7	OTU domain-containing protein 1	hCG2019360 | OTU domain-containing protein 1-like	.	.	.	.	.
ENSOARG00000004514	ENSOARP00000004827	0	.	RPS14	ribosomal protein S14	8	.	.	0	0	0	0	0	0	.	.	.	.	.	.	.
ENSOARG00000004517	ENSOARP00000004829	0	.	FAM107B	family with sequence similarity 107 member B	6	.	XP_005688014.1 (Capra hircus: 98.540% identity in aln 44.6% length of target)	5	4	80	4	4	40	protein FAM107B	.	0	0	.	.	ENSOARG00000006038/YAF2
ENSOARG00000004530	ENSOARP00000004847	2	ENSOARG00000000782, ENSOARG00000019797	ZCRB1	zinc finger CCHC-type and RNA binding motif containing 1	1	NP_149105.3 (98.6% identity in aln 100.0% length of target)	XP_011987293.1 (Ovis aries musimon: 98.6% identity in aln 100.0% length of target) | NP_001020489.1 (Bos taurus: 100.0% identity in aln 100.0% length of target) | XP_006189507.1 (Camelus ferus: 97.7% identity in aln 100.0% length of target)	62	5	8.1	76	4	87.1	zinc finger CCHC-type and RNA-binding motif-containing protein 1	zinc finger CCHC-type and RNA-binding motif-containing protein 1-like | zinc finger CCHC-type and RNA-binding motif-containing protein 1 isoform 1 | mCG19744, isoform CRA_b | Zinc finger CCHC-type and RNA binding motif 1	6	-4,+2	ENSOARG00000004050/INPP5E	PMPCA,SDCCAG3,SNAPC4,CARD9,DNLZ,GPSM1,CCDC187	ENSOARG00000004603/QSOX2
ENSOARG00000004532	ENSOARP00000004850	0	.	DNLZ	DNL-type zinc finger	3	.	XP_011973463.1 (Ovis aries musimon: 100.0% identity in aln 60.9% length of target) | XP_013823520.1 (Capra hircus: 97.1% identity in aln 60.9% length of target) | XP_005888587.1 (Bos mutus: 94.2% identity in aln 71.5% length of target) | XP_010835471.1 (Bison bison bison: 95.1% identity in aln 71.5% length of target)	11	6	54.5	8	6	90.9	DNL-type zinc finger protein	DNL-type zinc finger protein-like	0	0	ENSOARG00000004507/ZNF445	.	.
ENSOARG00000004538	ENSOARP00000004854	0	.	ZKSCAN7	zinc finger with KRAB and SCAN domains 7	1	.	XP_014961110.1 (Ovis aries musimon: 99.851% identity in aln 70.4% length of target)XP_013828810.1 (Capra hircus: 97.8% identity in aln 100.0% length of target) | XP_010815816.1 (Bos taurus: 96.0% identity in aln 100.0% length of target) | XP_010840431.1 (Bison bison bison: 95.9% identity in aln 100.0% length of target)	4	4	100	3	4	100	zinc finger protein with KRAB and SCAN domains 7	.	1	-1,0	ENSOARG00000004518/ENSBTAG00000002571	UBA2,WTIP	ENSOARG00000004551/ENSBTAG00000018080
ENSOARG00000004543	ENSOARP00000004865	0	.	WTIP	Wilms tumor 1 interacting protein	1	.	XP_006184726.1 (Camelus ferus: 97.7% identity in aln 92.2% length of target)	61	6	9.8	50	5	95.1	Wilms tumor protein 1-interacting protein	Wtip protein | WT1-interacting protein	0	0	.	.	.
ENSOARG00000004547	ENSOARP00000004864	1	ENSOARG00000020759	FAM96A	family with sequence similarity 96 member A	1	.	XP_006044991.1 (Bubalus bubalis: 96.9% identity in aln 100.0% length of target) | XP_006184050.1 (Camelus ferus: 95.6% identity in aln 100.0% length of target) | XP_005958075.1 (Pantholops hodgsonii: 95.6% identity in aln 100.0% length of target)	59	6	10.2	73	5	86.4	MIP18 family protein FAM96A	MIP18 family protein FAM96A precursor | MIP18 family protein FAM96A-like | Protein FAM96A | MIP18 family protein FAM96A isoform a precursor	.	.	.	.	.
ENSOARG00000004549	ENSOARP00000004867	0	.	TMEM132D	transmembrane protein 132D	4	.	.	5	5	100	4	5	100	transmembrane protein 132D	.	0	0	.	.	.
ENSOARG00000004560	ENSOARP00000004881	1	.	RPL7A	RPL7A	1	NP_000963.1 (92.8% identity in aln 94.4% length of target)	NP_001035610.1 (Bos taurus: 93.2% identity in aln 94.4% length of target) | XP_014407817.1 (Camelus ferus: 91.6% identity in aln 94.4% length of target) | XP_005984921.1 (Pantholops hodgsonii: 92.4% identity in aln 94.4% length of target)	128	4	3.1	137	4	87.5	60S ribosomal protein L7a	Ribosomal protein L7A | ribosomal protein L7a, isoform CRA_b | mCG130223 | ribosomal protein L7a, isoform CRA_d | mCG121875 | ribosomal protein L7a | mCG18601 | Rpl7a protein | LOC100037086 protein | ribosomal protein L7a, isoform CRA_e | ribosomal protein L7a, isoform CRA_a | ribosomal protein L7A | 60S ribosomal protein L7a-like | ribosomal protein L7a, isoform CRA_f | hCG2028724	.	.	.	.	.
ENSOARG00000004570	ENSOARP00000004890	0	.	ANP32B	acidic nuclear phosphoprotein 32 family member B	8	.	.	0	0	0	0	0	0	.	.	.	.	.	.	.
ENSOARG00000004616	ENSOARP00000004936	0	.	RPS14	ribosomal protein S14	8	.	.	0	0	0	0	0	0	.	.	.	.	.	.	.
ENSOARG00000004617	ENSOARP00000004939	0	.	HCAR2	hydroxycarboxylic acid receptor 2	1	.	XP_005691444.1 (Capra hircus: 99.7% identity in aln 100.0% length of target) | XP_005911898.2 (Bos mutus: 97.5% identity in aln 100.0% length of target) | XP_015330996.1 (Bos taurus: 97.8% identity in aln 100.0% length of target) | XP_010839615.1 (Bison bison bison: 98.1% identity in aln 100.0% length of target) | XP_005955331.1 (Pantholops hodgsonii: 98.9% identity in aln 100.0% length of target)	5	5	100	4	4	100	hydroxycarboxylic acid receptor 2	.	.	.	.	.	.
ENSOARG00000004622	ENSOARP00000004944	0	.	ZNF181	zinc finger protein 181	1	.	XP_014959888.1 (Ovis aries musimon: 99.6% identity in aln 100.0% length of target) | XP_005692322.1 (Capra hircus: 98.2% identity in aln 100.0% length of target) | XP_005896149.1 (Bos mutus: 96.5% identity in aln 100.0% length of target) | NP_001070017.1 (Bos taurus: 96.7% identity in aln 100.0% length of target) | XP_006065335.1 (Bubalus bubalis: 96.8% identity in aln 100.0% length of target) | …	13	8	61.5	8	6	100	zinc finger protein 181	.	1	0,+1	.	VARS,VWA7	.
ENSOARG00000004625	ENSOARP00000004947	0	.	VARS	valyl-tRNA synthetase	4	.	.	47	5	10.6	41	5	97.9	valine--tRNA ligase	valyl-tRNA synthetase 2	.	.	.	.	.
ENSOARG00000004648	ENSOARP00000004972	3	ENSOARG00000004667, ENSOARG00000009765, ENSOARG00000019193	RPL6	ribosomal protein L6	1	.	XP_005709463.2 (Capra hircus: 99.6% identity in aln 100.0% length of target) | XP_014338143.1 (Bos mutus: 98.6% identity in aln 99.3% length of target) | NP_001026926.1 (Bos taurus: 98.6% identity in aln 100.0% length of target) | XP_006047453.1 (Bubalus bubalis: 94.4% identity in aln 100.0% length of target) | XP_014409138.1 (Camelus ferus: 95.1% identity in aln 100.0% length of target) | XP_005…	8	8	100	6	6	87.5	60S ribosomal protein L6	60S ribosomal protein L6-like	.	.	.	.	.
ENSOARG00000004667	ENSOARP00000004990	3	ENSOARG00000004648, ENSOARG00000009765, ENSOARG00000019193	RPL6	ribosomal protein L6	1	.	XP_005709463.2 (Capra hircus: 100.0% identity in aln 100.0% length of target) | XP_014338143.1 (Bos mutus: 99.0% identity in aln 99.3% length of target) | NP_001026926.1 (Bos taurus: 99.0% identity in aln 100.0% length of target) | XP_006047453.1 (Bubalus bubalis: 94.8% identity in aln 100.0% length of target) | XP_014409138.1 (Camelus ferus: 95.5% identity in aln 100.0% length of target) | XP_00…	8	8	100	6	6	87.5	60S ribosomal protein L6	60S ribosomal protein L6-like	0	0	.	.	ENSOARG00000004734/ENSBTAG00000045493
ENSOARG00000004731	ENSOARP00000005060	1	ENSOARG00000004744	CTNNA3	catenin alpha 3	1	XP_016871646.1 (96.8% identity in aln 100.0% length of target)	XP_006190938.1 (Camelus ferus: 97.3% identity in aln 99.5% length of target)	85	4	4.7	53	4	82.4	catenin alpha-3	catenin alpha-3-like | catenin (cadherin associated protein), alpha 3 | catenin alpha-3 isoform a | alpha T-catenin | rCG61001 | catenin (cadherin-associated protein), alpha 3, isoform CRA_b | alpha-T-catenin isoform X | catenin alpha-3 isoform 1 | alphaT-catenin | catenin alpha-3 isoform 2 | catenin (cadherin-associated protein), alpha 3, isoform CRA_a | Catenin (cadherin associated protein), al…	.	.	.	.	.
ENSOARG00000004735	ENSOARP00000005066	0	.	CCDC71L	coiled-coil domain containing 71-like	8	.	.	0	0	0	0	0	0	.	.	.	.	.	.	.
ENSOARG00000004739	ENSOARP00000005072	1	ENSOARG00000016357	WIPI3	WIPI3	1	NP_062559.2 (97.3% identity in aln 95.6% length of target)	XP_005907237.1 (Bos mutus: 99.7% identity in aln 100.0% length of target) | NP_001068715.1 (Bos taurus: 98.2% identity in aln 95.6% length of target) | XP_006174313.1 (Camelus ferus: 99.4% identity in aln 100.0% length of target) | XP_006199536.1 (Vicugna pacos: 99.1% identity in aln 100.0% length of target)	156	4	2.6	172	3	96.2	WD repeat domain phosphoinositide-interacting protein 3	WD repeat domain phosphoinositide-interacting protein 3-like | WD repeat domain 45B | RecName: Full=WD repeat domain phosphoinositide-interacting protein 3; Short=WIPI-3; AltName: Full=WD repeat-containing protein 45-like; Short=WDR45-like protein; AltName: Full=WD repeat-containing protein 45B	0	0	ENSOARG00000004770/CCDC88A	.	.
ENSOARG00000004742	ENSOARP00000005077	0	.	CFAP36	cilia and flagella associated protein 36	8	.	.	0	0	0	0	0	0	.	.	.	.	.	.	.
ENSOARG00000004748	ENSOARP00000005081	5	ENSOARG00000000323, ENSOARG00000016189, ENSOARG00000016203, ENSOARG00000016249, ENSOARG00000016698	OR7A17	olfactory receptor family 7 subfamily A member 17	1	.	XP_005701383.1 (Capra hircus: 97.1% identity in aln 95.7% length of target) | XP_014336914.1 (Bos mutus: 92.8% identity in aln 95.0% length of target) | XP_015327424.1 (Bos taurus: 91.9% identity in aln 95.7% length of target) | XP_006054773.1 (Bubalus bubalis: 92.6% identity in aln 95.7% length of target) | XP_010843325.1 (Bison bison bison: 92.2% identity in aln 95.0% length of target)	7	6	85.7	4	4	100	olfactory receptor 7A17	.	0	0	ENSOARG00000004620/ENSBTAG00000024153	.	ENSOARG00000013703/NRDC
ENSOARG00000004769	ENSOARP00000005118	0	.	OSBPL9	oxysterol binding protein like 9	1	XP_011538904.1 (96.7% identity in aln 100.0% length of target)	XP_005678487.1 (Capra hircus: 99.7% identity in aln 100.0% length of target) | XP_005894787.1 (Bos mutus: 99.5% identity in aln 100.0% length of target) | XP_010848016.1 (Bison bison bison: 99.3% identity in aln 100.0% length of target) | XP_006180302.1 (Camelus ferus: 98.8% identity in aln 100.0% length of target)	63	7	11.1	58	6	92.1	oxysterol-binding protein-related protein 9	oxysterol-binding protein-related protein 9-like | oxysterol binding protein-like 9, isoform CRA_a | oxysterol binding protein-like 9 (predicted), isoform CRA_a | oxysterol-binding protein-related protein 9 isoform e	11	-11,0	.	TSGA13,COPG2,MEST,CEP41,CPA1,CPA5,CPA4,SSMEM1,TMEM209,KLHDC10,ZC3HC1,UBE2H	.
ENSOARG00000004778	ENSOARP00000005116	0	.	UBE2H	ubiquitin conjugating enzyme E2 H	3	.	XP_005981507.1 (Pantholops hodgsonii: 100.0% identity in aln 72.5% length of target)	38	2	5.3	31	2	84.2	ubiquitin-conjugating enzyme E2 H	Ubiquitin-conjugating enzyme E2 H | similar to novel protein similar to esterases (predicted)	0	0	ENSOARG00000004794/ENSBTAG00000047069	.	.
ENSOARG00000004799	ENSOARP00000005143	0	.	PACRG	PARK2 coregulated	5	.	.	5	0	0	5	0	80	parkin coregulated gene protein	Parkin coregulated protein	.	.	.	.	.
ENSOARG00000004833	ENSOARP00000005179	0	.	RUFY1	RUN and FYVE domain-containing protein 1	8	.	.	0	0	0	0	0	0	.	.	.	.	.	.	.
ENSOARG00000004853	ENSOARP00000005201	1	ENSOARG00000001425	MEA1	male-enhanced antigen 1	1	.	XP_011969301.1 (Ovis aries musimon: 98.9% identity in aln 100.0% length of target) | XP_005696376.1 (Capra hircus: 100.0% identity in aln 100.0% length of target) | XP_005900181.1 (Bos mutus: 98.3% identity in aln 100.0% length of target) | NP_777073.1 (Bos taurus: 98.3% identity in aln 100.0% length of target) | XP_006069289.1 (Bubalus bubalis: 100.0% identity in aln 97.3% length of target) | XP…	71	11	15.5	46	7	93	male-enhanced antigen 1	male-enhanced antigen 1-like | male-enhanced antigen 1 isoform b | Male-enhanced antigen 1 | male-enhanced antigen 1 isoform a	.	.	.	.	.
ENSOARG00000004854	ENSOARP00000005204	0	.	CMAH	CMAH	1	.	XP_005696828.1 (Capra hircus: 99.7% identity in aln 99.7% length of target) | XP_014336937.1 (Bos mutus: 98.8% identity in aln 100.0% length of target) | XP_010841756.1 (Bison bison bison: 98.8% identity in aln 100.0% length of target) | XP_014412671.1 (Camelus ferus: 93.7% identity in aln 99.3% length of target)	84	6	7.1	39	6	78.6	cytidine monophosphate-N-acetylneuraminic acid hydroxylase	cytidine monophospho-N-acetylneuraminic acid hydroxylase | RecName: Full=Cytidine monophosphate-N-acetylneuraminic acid hydroxylase; Short=CMP-N-acetylneuraminic acid hydroxylase; AltName: Full=CMP-N-acetylneuraminate monooxygenase; AltName: Full=CMP-Neu5Ac hydroxylase; AltName: Full=CMP-NeuAc hydroxylase | cytidine monophosphate-N-acetylneuraminic acid hydroxylase-like | Cytidine monophosphate-N…	.	.	.	.	.
ENSOARG00000004858	ENSOARP00000005208	3	ENSOARG00000009669, ENSOARG00000011275, ENSOARG00000019770	HMGN1	high mobility group nucleosome binding domain 1	1	.	XP_012026324.1 (Ovis aries musimon: 99.0% identity in aln 100.0% length of target) | XP_005678075.1 (Capra hircus: 98.0% identity in aln 92.5% length of target) | NP_001029944.1 (Bos taurus: 100.0% identity in aln 100.0% length of target) | XP_006069431.1 (Bubalus bubalis: 98.0% identity in aln 100.0% length of target) | XP_005971462.1 (Pantholops hodgsonii: 94.1% identity in aln 99.0% length of …	52	10	19.2	41	8	100	non-histone chromosomal protein HMG-14	.	0	0	.	.	.
ENSOARG00000004877	ENSOARP00000005224	1	ENSOARG00000005925	RPL37	ribosomal protein L37	1	NP_000988.1 (100.0% identity in aln 100.0% length of target)	.	83	1	1.2	180	1	77.1	60S ribosomal protein L37	60S ribosomal protein L37-like | 60S ribosomal protein L37-like protein | ribosomal protein L37 S homeolog	.	.	.	.	.
ENSOARG00000004909	ENSOARP00000005260	0	.	RNASET2	ribonuclease T2	1	.	XP_012010746.1 (Ovis aries musimon: 99.1% identity in aln 93.1% length of target) | XP_013822103.1 (Capra hircus: 98.7% identity in aln 93.1% length of target) | XP_006067093.1 (Bubalus bubalis: 93.9% identity in aln 93.1% length of target) | XP_010837887.1 (Bison bison bison: 93.5% identity in aln 93.1% length of target) | XP_005982978.1 (Pantholops hodgsonii: 98.6% identity in aln 100.0% length…	8	7	87.5	5	6	75	ribonuclease T2	RNASET2 protein | ribonuclease T2 precursor	.	.	.	.	.
ENSOARG00000004918	ENSOARP00000005270	0	.	FGF14	fibroblast growth factor 14	4	.	.	5	1	20	5	1	80	fibroblast growth factor 14	Fibroblast growth factor 14	.	.	.	.	.
ENSOARG00000004923	ENSOARP00000005273	0	.	EMG1	ribosomal RNA small subunit methyltransferase NEP1	8	.	.	0	0	0	0	0	0	.	.	0	0	ENSOARG00000005147/CALM2	.	.
ENSOARG00000004939	ENSOARP00000005291	0	.	BTF3	transcription factor BTF3	8	.	.	0	0	0	0	0	0	.	.	5	-3,+2	.	TMCC2,DSTYK,RBBP5,TMEM81,CNTN2,NFASC	.
ENSOARG00000004965	ENSOARP00000005320	1	ENSOARG00000002911	TMEM81	transmembrane protein 81	1	.	XP_005690453.1 (Capra hircus: 98.9% identity in aln 100.0% length of target) | XP_005901479.1 (Bos mutus: 93.1% identity in aln 100.0% length of target) | XP_006062335.1 (Bubalus bubalis: 93.1% identity in aln 100.0% length of target) | XP_010852465.1 (Bison bison bison: 93.1% identity in aln 100.0% length of target) | XP_005962697.1 (Pantholops hodgsonii: 96.4% identity in aln 100.0% length of t…	7	7	100	5	6	85.7	transmembrane protein 81	transmembrane protein 81 precursor	7	-7,0	ENSOARG00000004641/PFN2	RNF13,ANKUB1,COMMD2,WWTR1,TM4SF4,TM4SF1,TM4SF18,CP	.
ENSOARG00000004970	ENSOARP00000005325	1	.	CP	CP	1	.	XP_012023870.1 (Ovis aries musimon: 99.8% identity in aln 100.0% length of target) | XP_005675517.1 (Capra hircus: 98.2% identity in aln 100.0% length of target) | XP_005902502.1 (Bos mutus: 94.0% identity in aln 100.0% length of target) | XP_002685053.3 (Bos taurus: 93.8% identity in aln 100.0% length of target) | XP_006063184.1 (Bubalus bubalis: 94.1% identity in aln 100.0% length of target) | …	8	8	100	5	6	100	ceruloplasmin	.	.	.	.	.	.
ENSOARG00000004976	ENSOARP00000005329	0	.	RPL10	60S ribosomal protein L10	7	.	.	209	10	4.8	122	7	55	60S ribosomal protein L10-like	.	0	0	.	.	.
ENSOARG00000004986	ENSOARP00000005337	1	ENSOARG00000018872	MRPL41	mitochondrial ribosomal protein L41	1	.	XP_012016512.1 (Ovis aries musimon: 98.5% identity in aln 100.0% length of target) | XP_005687446.2 (Capra hircus: 97.8% identity in aln 100.0% length of target) | NP_001092835.1 (Bos taurus: 96.3% identity in aln 100.0% length of target)	10	4	40	9	3	80	39S ribosomal protein L41, mitochondrial	Chain e, Structure Of The Large Subunit Of The Mammalian Mitochondrial Ribosome, Part 2 Of 2 | 39S ribosomal protein L41, mitochondrial-like	0	0	.	.	ENSOARG00000000181/AAED1
ENSOARG00000004995	ENSOARP00000005350	10	ENSOARG00000000975, ENSOARG00000001105, ENSOARG00000004460, ENSOARG00000006035, ENSOARG00000006818, ENSOARG00000008467, ENSOARG00000015615, ENSOARG00000018407, ENSOARG00000018456, ENSOARG00000019908	RPS15A	ribosomal protein S15a	1	NP_001010.2 (96.9% identity in aln 100.0% length of target)	XP_011984926.1 (Ovis aries musimon: 93.8% identity in aln 100.0% length of target) | XP_005899584.1 (Bos mutus: 96.2% identity in aln 100.0% length of target) | XP_006055254.1 (Bubalus bubalis: 95.4% identity in aln 100.0% length of target) | XP_005965896.1 (Pantholops hodgsonii: 96.2% identity in aln 100.0% length of target)	93	10	10.8	159	4	88.2	40S ribosomal protein S15A	ADP-ribosylation factor-like protein 6-interacting protein 1 | 30S ribosomal protein S8 | hCG1994130, isoform CRA_b | 40S ribosomal protein S15 | ribosomal protein S15a, isoform CRA_b | mCG50271 | Chain a, M48s Late-stage Initiation Complex, Purified From Rabbit Reticulocytes Lysates, Displaying Eif2 Ternary Complex And Eif3 I And G Subunits Relocated To The Intersubunit Face | rCG40707, isoform …	.	.	.	.	.
ENSOARG00000005002	ENSOARP00000005358	0	.	ALG1	ALG1, chitobiosyldiphosphodolichol beta-mannosyltransferase	1	.	XP_005224461.1 (Bos taurus: 95.2% identity in aln 97.5% length of target)	13	8	61.5	9	6	84.6	chitobiosyldiphosphodolichol beta-mannosyltransferase	Chitobiosyldiphosphodolichol beta-mannosyltransferase | chitobiosyldiphosphodolichol beta-mannosyltransferase precursor	.	.	.	.	.
ENSOARG00000005013	ENSOARP00000005368	0	.	U2AF1L4	splicing factor U2AF 26 kDa subunit	8	.	.	0	0	0	0	0	0	.	.	.	.	.	.	.
ENSOARG00000005020	ENSOARP00000005378	0	.	PSENEN	presenilin enhancer gamma-secretase subunit	1	NP_758844.1 (95.0% identity in aln 100.0% length of target)	NP_001008669.1 (Bos taurus: 99.0% identity in aln 100.0% length of target)	34	2	5.9	80	2	91.2	gamma-secretase subunit PEN-2	protein lin-37-like protein | Protein lin-37 like protein | PSENEN	0	0	ENSOARG00000004197/AWAT2	.	.
ENSOARG00000005024	ENSOARP00000005380	6	ENSOARG00000003480, ENSOARG00000005934, ENSOARG00000008109, ENSOARG00000014076, ENSOARG00000014324, ENSOARG00000019540	RPL23A	ribosomal protein L23a	1	NP_000975.2 (100.0% identity in aln 100.0% length of target)	XP_014964041.1 (Ovis aries musimon: 96.2% identity in aln 98.7% length of target) | XP_005675880.1 (Capra hircus: 100.0% identity in aln 98.7% length of target) | XP_014337154.1 (Bos mutus: 99.4% identity in aln 100.0% length of target) | XP_006042239.1 (Bubalus bubalis: 97.4% identity in aln 91.8% length of target) | XP_006185001.1 (Camelus ferus: 96.8% identity in aln 100.0% length of target)	105	13	12.4	96	6	75.2	60S ribosomal protein L23a	60S ribosomal protein L23a-like | Rpl23a protein | mCG1034428 | hCG2001000 | ribosomal protein L23a (predicted) | COX assembly mitochondrial protein homolog | homology to rat ribosomal protein L23 | hCG16001, isoform CRA_a | ribosomal protein L23a Y-linked protein | hCG16001, isoform CRA_b | ribosomal protein L23a, isoform CRA_a | 60S ribosomal protein L23a-like isoform 1	.	.	.	.	.
ENSOARG00000005067	ENSOARP00000005433	0	.	VHL	von Hippel-Lindau tumor suppressor	1	.	XP_014337430.1 (Bos mutus: 96.8% identity in aln 94.9% length of target)	90	8	8.9	66	7	83.3	von Hippel-Lindau disease tumor suppressor	Von Hippel-Lindau disease tumor suppressor | von Hippel-Lindau syndrome homolog, isoform CRA_b | von Hippel-Lindau disease tumor suppressor-like protein | Chain C, Pvhl:elob:eloc Complex, In Complex With Capped Hydroxyproline | von Hippel-Lindau disease tumor suppressor isoform 1 | Chain C, Pvhl54-213-Elob-Eloc Complex (4r)-4-Hydroxy-1-[(3-Methylisoxazol-5- Yl)acetyl]-N-[4-(1,3-Oxazol-5-Yl)benzyl…	0	0	.	.	ENSOARG00000005045/ENPP1
ENSOARG00000005096	ENSOARP00000005464	1	.	ENPP3	ENPP3	1	.	XP_006054994.1 (Bubalus bubalis: 95.405% identity in aln 95.0% length of target)XP_006054994.1 (Bubalus bubalis: 95.4% identity in aln 95.0% length of target)	1	1	100	1	1	100	ectonucleotide pyrophosphatase/phosphodiesterase family member 7-like	.	0	0	.	.	.
ENSOARG00000005104	ENSOARP00000005473	0	.	BLVRA	biliverdin reductase A	8	.	.	0	0	0	0	0	0	.	.	.	.	.	.	.
ENSOARG00000005113	ENSOARP00000005480	0	.	FAM72A	family with sequence similarity 72 member A	1	.	XP_005690467.1 (Capra hircus: 97.3% identity in aln 99.3% length of target) | NP_001094733.1 (Bos taurus: 98.0% identity in aln 99.3% length of target) | XP_006182336.1 (Camelus ferus: 94.6% identity in aln 99.3% length of target) | XP_006215531.1 (Vicugna pacos: 93.9% identity in aln 99.3% length of target) | XP_005954815.1 (Pantholops hodgsonii: 98.6% identity in aln 99.3% length of target)	54	7	13	62	7	90.7	protein FAM72A	protein FAM72A-like | protein FAM72A isoform 1 | Family with sequence similarity 72, member B | protein FAM72B isoform 1	0	0	.	.	.
ENSOARG00000005134	ENSOARP00000005506	1	ENSOARG00000018577	ATP5J2	ATP synthase, H+ transporting, mitochondrial Fo complex subunit F2	1	.	XP_014964482.1 (Ovis aries musimon: 100.000% identity in aln 100.0% length of target)XP_014964482.1 (Ovis aries musimon: 100.0% identity in aln 100.0% length of target)	1	1	100	0	1	100	ATP synthase subunit f, mitochondrial	.	0	0	.	.	ENSOARG00000010652/TMEM114
ENSOARG00000005135	ENSOARP00000005507	0	.	RBFOX1	RNA binding protein fox-1 homolog 1	8	.	.	0	0	0	0	0	0	.	.	.	.	.	.	.
ENSOARG00000005142	ENSOARP00000005512	0	.	TBP	TATA-box binding protein	5	.	.	5	0	0	4	0	100	TATA-box-binding protein	.	0	0	.	.	ENSOARG00000013815/POPDC2
ENSOARG00000005172	ENSOARP00000005545	0	.	COX17	COX17, cytochrome c oxidase copper chaperone	1	NP_005685.1 (90.5% identity in aln 100.0% length of target)	XP_006210392.1 (Vicugna pacos: 96.8% identity in aln 100.0% length of target)	45	7	15.6	67	6	75.6	COX17, cytochrome c oxidase copper chaperone	cytochrome c oxidase copper chaperone-like | COX17 homolog, cytochrome c oxidase assembly protein | RecName: Full=Cytochrome c oxidase copper chaperone; AltName: Full=Dopuin | Chain A, Solution Structure Of Human Apocox17 | COX17	2	-2,0	.	DDAH2,CLIC1,MSH5	.
ENSOARG00000005255	ENSOARP00000005647	0	.	MSH5	mutS protein homolog 5	8	.	.	0	0	0	0	0	0	.	.	7	-6,+1	ENSOARG00000018236/QSOX1	LHX4,ACBD6,XPR1,KIAA1614,STX6,MR1,IER5,CACNA1E	.
ENSOARG00000005256	ENSOARP00000005639	0	.	IER5	immediate early response 5	4	.	XP_011981941.1 (Ovis aries musimon: 100.000% identity in aln 34.4% length of target)	2	1	50	1	1	100	immediate early response gene 5 protein	.	0	0	.	.	.
ENSOARG00000005272	ENSOARP00000005658	0	.	AIF1L	allograft inflammatory factor 1 like	8	.	.	0	0	0	0	0	0	.	.	.	.	.	.	.
ENSOARG00000005325	ENSOARP00000005716	0	.	METTL21E	protein-lysine methyltransferase METTL21E	6	.	XP_011974661.1 (Ovis aries musimon: 99.655% identity in aln 100.0% length of target)	10	9	90	5	6	70	protein-lysine methyltransferase METTL21E	.	0	0	ENSOARG00000011292/ZNF529	.	.
ENSOARG00000005329	ENSOARP00000005718	0	.	ZNF566	zinc finger protein 566	4	.	.	22	8	36.4	15	5	90.9	zinc finger protein 566	zinc finger protein 82 homolog	.	.	.	.	.
ENSOARG00000005340	ENSOARP00000005733	0	.	ZFP14	ZFP14 zinc finger protein	4	.	.	5	4	80	5	4	100	zinc finger protein 14 homolog	.	2	-2,0	.	TMEM184A,PSMG3,ELFN1	ENSOARG00000005349/MAD1L1
ENSOARG00000005353	ENSOARP00000005744	0	.	ELFN1	extracellular leucine rich repeat and fibronectin type III domain containing 1	4	.	.	41	4	9.8	34	3	78	protein ELFN1	protein ELFN1 precursor | Extracellular leucine-rich repeat and fibronectin type-III domain-containing protein 1 | protein ELFN1-like | hCG1818658 | protein phosphatase 1 regulatory subunit 28	0	0	ENSOARG00000007032/ERCC8	.	.
ENSOARG00000005393	ENSOARP00000005788	0	.	NDUFAF2	NADH:ubiquinone oxidoreductase complex assembly factor 2	4	.	.	6	6	100	4	5	100	mimitin, mitochondrial	.	.	.	.	.	.
ENSOARG00000005394	ENSOARP00000005789	0	.	PPP1R14B	protein phosphatase 1 regulatory inhibitor subunit 14B	2	.	XP_006050959.1 (Bubalus bubalis: 99.2% identity in aln 84.7% length of target)	6	1	16.7	6	1	83.3	protein phosphatase 1 regulatory subunit 14B	protein phosphatase 1 regulatory subunit 14B-like	10	-4,+6	.	BRK1,FANCD2OS,FANCD2,EMC3,PRRT3,CRELD1,IL17RC,IL17RE,JAGN1,CIDEC,RPUSD3	ENSOARG00000005999/ENSBTAG00000007966
ENSOARG00000005415	ENSOARP00000005810	0	.	PRRT3	proline rich transmembrane protein 3	3	.	XP_005984367.1 (Pantholops hodgsonii: 96.7% identity in aln 61.9% length of target)	8	7	87.5	5	6	100	proline-rich transmembrane protein 3	.	.	.	.	.	.
ENSOARG00000005425	ENSOARP00000005820	0	.	SMN1	survival motor neuron protein	6	.	XP_012001296.1 (Ovis aries musimon: 97.070% identity in aln 92.9% length of target)	11	7	63.6	3	4	81.8	survival motor neuron protein	.	.	.	.	.	.
ENSOARG00000005435	ENSOARP00000005830	0	.	NRADD	NRADD	1	.	XP_013829043.1 (Capra hircus: 97.8% identity in aln 100.0% length of target) | XP_005910802.1 (Bos mutus: 96.9% identity in aln 100.0% length of target) | XP_005223148.1 (Bos taurus: 96.9% identity in aln 100.0% length of target) | XP_006065278.1 (Bubalus bubalis: 96.1% identity in aln 100.0% length of target) | XP_010860675.1 (Bison bison bison: 96.9% identity in aln 100.0% length of target) | X…	9	9	100	5	6	100	death domain-containing membrane protein NRADD	.	0	0	.	.	.
ENSOARG00000005436	ENSOARP00000005842	0	.	FAM65B	family with sequence similarity 65 member B	1	.	XP_012018501.1 (Ovis aries musimon: 99.907% identity in aln 97.6% length of target)XP_012018501.1 (Ovis aries musimon: 99.9% identity in aln 97.6% length of target)	1	1	100	0	1	100	protein FAM65B	.	.	.	.	.	.
ENSOARG00000005441	ENSOARP00000005835	0	.	ZFP30	ZFP30 zinc finger protein	4	.	.	15	8	53.3	12	7	93.3	zinc finger protein 30 homolog	zinc finger protein 865-like	3	-2,+1	.	NDUFB7,TECR,DNAJB1,GIPC1	ENSOARG00000005678/PTGER1
ENSOARG00000005443	ENSOARP00000005841	1	.	DNAJB1	DNAJB1	1	.	NP_001028935.1 (Bos taurus: 100.0% identity in aln 100.0% length of target) | XP_006066611.1 (Bubalus bubalis: 99.7% identity in aln 100.0% length of target) | XP_010853728.1 (Bison bison bison: 98.8% identity in aln 100.0% length of target)	48	3	6.2	56	3	87.5	dnaJ homolog subfamily B member 1	dnaJ homolog subfamily B member 1 isoform 1 | DnaJ-like protein subfamily B member 1 | DnaJ-like subfamily B member 1 | DNAJB1	0	0	ENSOARG00000005114/TMEM100	.	.
ENSOARG00000005449	ENSOARP00000005845	1	ENSOARG00000005452	MMD	monocyte to macrophage differentiation associated	1	NP_036461.2 (94.1% identity in aln 100.0% length of target)	XP_012021082.1 (Ovis aries musimon: 95.8% identity in aln 100.0% length of target) | XP_005905952.1 (Bos mutus: 95.2% identity in aln 100.0% length of target) | NP_001069069.1 (Bos taurus: 95.0% identity in aln 100.0% length of target) | XP_006178208.1 (Camelus ferus: 92.0% identity in aln 100.0% length of target) | XP_005969977.1 (Pantholops hodgsonii: 96.1% identity in aln 100.0% length of targ…	88	6	6.8	83	5	85.2	monocyte to macrophage differentiation factor	Monocyte to macrophage differentiation protein | Monocyte to macrophage differentiation factor | monocyte to macrophage differentiation protein | monocyte to macrophage differentiation factor-like	2	-1,+1	.	TMEM100,MMD,HLF	.
ENSOARG00000005452	ENSOARP00000005853	1	ENSOARG00000005449	MMD	monocyte to macrophage differentiation associated	1	.	XP_005905952.1 (Bos mutus: 99.1% identity in aln 100.0% length of target) | XP_005969977.1 (Pantholops hodgsonii: 100.0% identity in aln 100.0% length of target)	131	3	2.3	89	3	76.3	monocyte to macrophage differentiation factor	Monocyte to macrophage differentiation factor | Monocyte to macrophage differentiation protein | monocyte to macrophage differentiation protein | monocyte to macrophage differentiation factor-like	.	.	.	.	.
ENSOARG00000005468	ENSOARP00000005868	2	ENSOARG00000005485, ENSOARG00000018594	SPIN2B	spindlin family member 2B	1	.	XP_014946305.1 (Ovis aries musimon: 99.2% identity in aln 99.6% length of target) | XP_005701197.1 (Capra hircus: 96.9% identity in aln 100.0% length of target) | NP_001099126.1 (Bos taurus: 96.1% identity in aln 100.0% length of target) | XP_010842874.1 (Bison bison bison: 95.7% identity in aln 100.0% length of target) | XP_006219804.1 (Vicugna pacos: 94.2% identity in aln 100.0% length of targe…	76	7	9.2	54	7	77.6	spindlin-2B	spindlin-2B-like | spindlin-2 | Spindlin family, member 2A | spindlin-2B isoform 1 | Spindlin-like protein 2B | spindlin-2B isoform 4 | spindlin-2A-like | spindlin-2A	.	.	.	.	.
ENSOARG00000005485	ENSOARP00000005889	2	ENSOARG00000005468, ENSOARG00000018594	SPIN2B	spindlin family member 2B	1	.	XP_014946305.1 (Ovis aries musimon: 96.9% identity in aln 100.0% length of target) | XP_005701197.1 (Capra hircus: 98.4% identity in aln 99.6% length of target) | NP_001099126.1 (Bos taurus: 97.7% identity in aln 99.6% length of target) | XP_010842874.1 (Bison bison bison: 97.3% identity in aln 99.6% length of target) | XP_006219804.1 (Vicugna pacos: 95.7% identity in aln 99.6% length of target)	80	7	8.8	57	7	77.5	spindlin-2B	spindlin-2B-like | spindlin-2 | Spindlin family, member 2A | spindlin-2B isoform 1 | Spindlin-like protein 2B | spindlin-2B isoform 4 | spindlin-2A-like | spindlin-2A	4	-3,+1	.	RAD17,MARVELD2,OCLN,GTF2H2,NAIP	.
ENSOARG00000005496	ENSOARP00000005905	0	.	GTF2H2	general transcription factor IIH subunit 2	1	NP_001506.1 (97.5% identity in aln 100.0% length of target)	XP_005694652.1 (Capra hircus: 99.2% identity in aln 100.0% length of target) | NP_001033619.1 (Bos taurus: 99.2% identity in aln 100.0% length of target) | XP_006185257.1 (Camelus ferus: 96.7% identity in aln 100.0% length of target) | XP_006197620.1 (Vicugna pacos: 97.2% identity in aln 100.0% length of target) | XP_005960084.1 (Pantholops hodgsonii: 99.5% identity in aln 100.0% length of target)	83	7	8.4	72	7	88	general transcription factor IIH subunit 2	general transcription factor IIH subunit 2-like protein | general transcription factor IIH subunit 2-like | General transcription factor IIH subunit 2 | Transcription factor TFIIIB component B'' like protein	.	.	.	.	.
ENSOARG00000005508	ENSOARP00000005912	0	.	SPIN2	SPIN2	1	.	XP_005701200.1 (Capra hircus: 99.6% identity in aln 100.0% length of target) | NP_001073238.1 (Bos taurus: 98.1% identity in aln 100.0% length of target) | XP_010850035.1 (Bison bison bison: 97.7% identity in aln 100.0% length of target)	22	8	36.4	14	6	77.3	spindlin-2	spindlin-2-like | spindlin-2-like isoform 1	.	.	.	.	.
ENSOARG00000005527	ENSOARP00000005934	0	.	DLGAP2	disks large-associated protein 2	8	.	.	0	0	0	0	0	0	.	.	.	.	.	.	.
ENSOARG00000005529	ENSOARP00000005939	0	.	UBE2F	ubiquitin conjugating enzyme E2 F (putative)	8	.	.	0	0	0	0	0	0	.	.	0	0	.	.	ENSOARG00000015448/PLSCR4
ENSOARG00000005557	ENSOARP00000005967	0	.	PLSCR1	phospholipid scramblase 1	6	.	XP_004003325.1 (Ovis aries: 100.000% identity in aln 100.0% length of target)	7	7	100	5	5	42.9	phospholipid scramblase 1	.	.	.	.	.	.
ENSOARG00000005594	ENSOARP00000006002	0	.	RPL10	60S ribosomal protein L10	8	.	.	0	0	0	0	0	0	.	.	6	-4,+2	ENSOARG00000005300/LAMTOR2	RAB25,MEX3A,LMNA,SEMA4A,SLC25A44,PMF1,BGLAP	ENSOARG00000005692/ENSBTAG00000009434
ENSOARG00000005597	ENSOARP00000006005	1	ENSOARG00000017297	SLC25A44	solute carrier family 25 member 44	1	.	XP_005677411.1 (Capra hircus: 99.7% identity in aln 99.7% length of target) | NP_001071325.1 (Bos taurus: 98.7% identity in aln 99.7% length of target) | XP_006174623.1 (Camelus ferus: 98.1% identity in aln 99.7% length of target) | XP_006214677.1 (Vicugna pacos: 98.4% identity in aln 99.7% length of target) | XP_005961955.1 (Pantholops hodgsonii: 99.4% identity in aln 99.7% length of target)	79	8	10.1	72	6	91.1	solute carrier family 25 member 44	Solute carrier family 25 member 44 | KIAA0446 gene product | RIKEN cDNA B430110G05, isoform CRA_b | solute carrier family 25 member 44 isoform 2 | solute carrier family 25 member 44 isoform b | similar to CG5805-PA (predicted), isoform CRA_b	2	0,+2	ENSOARG00000015448/ENSBTAG00000022227	PLSCR1,PLSCR4,PLOD2	ENSOARG00000005732/C3orf58
ENSOARG00000005598	ENSOARP00000006007	0	.	PLSCR1	phospholipid scramblase 1	2	.	XP_012022840.2 (Ovis aries musimon: 97.6% identity in aln 77.7% length of target)	10	8	80	6	5	80	phospholipid scramblase 1	phospholipid scramblase 1-like | PLSCR1 protein	0	0	ENSOARG00000005697/CYP4B1	.	.
ENSOARG00000005632	ENSOARP00000006042	0	.	EFCAB14	EF-hand calcium binding domain 14	8	.	.	0	0	0	0	0	0	.	.	0	0	.	.	ENSOARG00000008505/ALDH8A1
ENSOARG00000005671	ENSOARP00000006081	1	ENSOARG00000014798	HBS1L	HBS1 like translational GTPase	1	.	XP_005684846.1 (Capra hircus: 99.1% identity in aln 100.0% length of target) | XP_005899176.1 (Bos mutus: 98.4% identity in aln 100.0% length of target) | NP_001039963.1 (Bos taurus: 98.4% identity in aln 100.0% length of target) | XP_010842558.1 (Bison bison bison: 98.4% identity in aln 100.0% length of target) | XP_006188527.1 (Camelus ferus: 92.9% identity in aln 100.0% length of target) | XP_…	19	8	42.1	13	7	100	HBS1-like protein	.	.	.	.	.	.
ENSOARG00000005695	ENSOARP00000006109	1	.	PFN1	PFN1	1	.	XP_006180625.1 (Camelus ferus: 99.0% identity in aln 94.2% length of target) | XP_006217667.1 (Vicugna pacos: 99.0% identity in aln 94.2% length of target)	73	7	9.6	77	6	76.7	profilin-1	profilin-1-like | Chain A, Structural Basis For Mutation-induced Destabilization Of Profilin 1 In Als | Profilin I | Chain A, Refined Solution Structure Of Human Profilin I | Chain A, Human Platelet Profilin Complexed With An L-Pro10- Iodotyrosine Peptide | Profilin-1 | Chain A, Crystallization And Structure Determination Of Bovine Profilin At 2.0 Angstroms Resolution | Chain A, Profilin Binds Pr…	0	0	.	.	.
ENSOARG00000005699	ENSOARP00000006110	1	ENSOARG00000009605	UFC1	ubiquitin-fold modifier conjugating enzyme 1	1	NP_057490.2 (96.4% identity in aln 100.0% length of target)	NP_001015663.1 (Bos taurus: 97.0% identity in aln 100.0% length of target) | XP_010831973.1 (Bison bison bison: 96.4% identity in aln 100.0% length of target)	49	5	10.2	78	3	87.8	ubiquitin-fold modifier-conjugating enzyme 1	Chain A, Crystal Structure Of The Ufc1, Ufm1 Conjugating Enzyme 1 | Chain A, Solution Nmr Structure Of Human E2-Like Ubiquitin-Fold Modifier Conjugating Enzyme 1 (Ufc1). Northeast Structural Genomics Consortium Target Hr41 | Chain A, Crystal Structure Of The Human E2-Like Ubiquitin-Fold Modifier Conjugating Enzyme 1 (Ufc1). Northeast Structural Genomics Consortium Target Hr41 | Ubiquitin-fold mod…	0	0	ENSOARG00000012662/ACSL3	.	ENSOARG00000012684/MOGAT1
ENSOARG00000005717	ENSOARP00000006128	0	.	RPS6	ribosomal protein S6	8	.	.	0	0	0	0	0	0	.	.	6	-1,+5	ENSOARG00000005834/PIK3R1	SLC30A5,CCNB1,CENPH,MRPS36,CDK7,CCDC125,AK6	.
ENSOARG00000005759	ENSOARP00000006177	1	ENSOARG00000021023	CCNB1	cyclin B1	1	.	XP_005694663.1 (Capra hircus: 97.9% identity in aln 100.0% length of target) | NP_001039337.1 (Bos taurus: 95.8% identity in aln 100.0% length of target) | XP_006059003.1 (Bubalus bubalis: 96.7% identity in aln 100.0% length of target) | XP_005960071.1 (Pantholops hodgsonii: 97.9% identity in aln 100.0% length of target)	12	5	41.7	13	4	91.7	G2/mitotic-specific cyclin-B1	G2/mitotic-specific cyclin-B1-like	0	0	.	.	ENSOARG00000015559/ADAMTS16
ENSOARG00000005781	ENSOARP00000006196	0	.	IRX1	iroquois-class homeodomain protein IRX-1	8	.	.	0	0	0	0	0	0	.	.	2	0,+2	ENSOARG00000005895/TRMT61A	CKB,MARK3,EIF5	ENSOARG00000005535/ENSBTAG00000047319
ENSOARG00000005800	ENSOARP00000006220	1	ENSOARG00000001059	CKB	creatine kinase B	1	.	XP_006175708.2 (Camelus ferus: 95.7% identity in aln 96.4% length of target)	242	6	2.5	140	6	76	creatine kinase B-type	Creatine kinase B-type | creatine kinase B-type-like | creatine kinase-B | creatine kinase | CKB | creatine kinase, brain, isoform CRA_a | mCG1689, isoform CRA_b | creatine kinase, brain | Ckb protein | mCG114530 | Chain A, Crystal Structure Of Bovine Retinal Creatine Kinase | brain creatine kinase | Chain A, Crystal Structure Of Chicken Brain-Type Creatine Kinase At 1.41 Angstrom Resolution | cr…	0	0	.	.	ENSOARG00000005747/ENSBTAG00000047324
ENSOARG00000005814	ENSOARP00000006237	0	.	PDLIM1	PDZ and LIM domain 1	1	NP_066272.1 (91.1% identity in aln 91.8% length of target)	XP_011992953.1 (Ovis aries musimon: 98.7% identity in aln 91.8% length of target) | XP_006067894.1 (Bubalus bubalis: 98.0% identity in aln 91.8% length of target) | XP_014421000.1 (Camelus ferus: 95.6% identity in aln 96.1% length of target)	42	7	16.7	37	4	85.7	PDZ and LIM domain protein 1	PDZ and LIM domain protein 1-like | carboxyl terminal LIM domain protein | PDZ and LIM domain 1	.	.	.	.	.
ENSOARG00000005822	ENSOARP00000006246	1	ENSOARG00000005829	LGALS7	galectin 7	1	.	XP_002695021.1 (Bos taurus: 97.1% identity in aln 100.0% length of target) | XP_006068756.1 (Bubalus bubalis: 97.8% identity in aln 100.0% length of target) | XP_005958179.1 (Pantholops hodgsonii: 98.6% identity in aln 100.0% length of target)	12	10	83.3	7	6	91.7	galectin-7	galectin-7-like	.	.	.	.	.
ENSOARG00000005825	ENSOARP00000006248	0	.	ECHDC2	enoyl-CoA hydratase domain containing 2	8	.	.	0	0	0	0	0	0	.	.	.	.	.	.	.
ENSOARG00000005829	ENSOARP00000006252	1	ENSOARG00000005822	LGALS7	galectin 7	1	.	XP_002695021.1 (Bos taurus: 98.6% identity in aln 100.0% length of target) | XP_006068756.1 (Bubalus bubalis: 99.3% identity in aln 100.0% length of target) | XP_005958179.1 (Pantholops hodgsonii: 99.3% identity in aln 100.0% length of target)	12	10	83.3	7	6	91.7	galectin-7	galectin-7-like	4	-1,+3	ENSOARG00000005969/DST	BEND6,ZNF451,BAG2,RAB23,PRIM2	ENSOARG00000005697/ENSBTAG00000047911
ENSOARG00000005831	ENSOARP00000006253	0	.	ZNF451	zinc finger protein 451	1	.	XP_012008677.1 (Ovis aries musimon: 99.8% identity in aln 99.8% length of target) | XP_005223313.1 (Bos taurus: 97.8% identity in aln 99.8% length of target) | XP_006072942.1 (Bubalus bubalis: 98.4% identity in aln 99.8% length of target)	5	3	60	4	3	100	zinc finger protein 451	.	0	0	.	.	ENSOARG00000017126/PGAP2
ENSOARG00000005867	ENSOARP00000006288	0	.	RHOG	ras homolog family member G	1	.	XP_005700719.1 (Capra hircus: 99.0% identity in aln 95.5% length of target) | XP_006050868.1 (Bubalus bubalis: 96.3% identity in aln 95.5% length of target) | XP_005954855.1 (Pantholops hodgsonii: 99.5% identity in aln 97.0% length of target)	39	6	15.4	37	4	87.2	rho-related GTP-binding protein RhoG-like	rho-related GTP-binding protein RhoG | rho-related GTP-binding protein RhoG-like protein	0	0	.	.	.
ENSOARG00000005893	ENSOARP00000006309	1	ENSOARG00000004181	PDCD5	programmed cell death 5	1	NP_004699.1 (91.2% identity in aln 100.0% length of target)	NP_001039489.1 (Bos taurus: 96.0% identity in aln 100.0% length of target) | XP_006212260.1 (Vicugna pacos: 95.2% identity in aln 100.0% length of target) | XP_005958319.1 (Pantholops hodgsonii: 95.2% identity in aln 100.0% length of target)	35	5	14.3	54	3	82.9	programmed cell death protein 5	programmed cell death protein 5-like | Homo sapiens PDCD5	4	-3,+1	ENSOARG00000006848/NAXD	RAB20,COL4A2,COL4A1,IRS2,MYO16	.
ENSOARG00000005897	ENSOARP00000006320	0	.	IRS2	insulin receptor substrate 2	4	.	.	46	1	2.2	30	1	78.3	insulin receptor substrate 2	insulin receptor substrate-2 | insulin receptor substrate 2 insertion mutant | IRS-2, 4PS=insulin and cytokine signalling protein | mCG17323 | ADP-ribosylation factor-binding protein GGA2 | mutant insulin receptor substrate 2-like | hCG32158	10	0,+10	ENSOARG00000005775/ENSBTAG00000046034	TMED9,B4GALT7,N4BP3,RMND5B,NHP2,HNRNPAB,PHYKPL,COL23A1,CLK4,ZNF354A,PROP1	ENSOARG00000006839/ENSBTAG00000030704
ENSOARG00000005912	ENSOARP00000006337	0	.	TMED9	transmembrane p24 trafficking protein 9	8	.	.	0	0	0	0	0	0	.	.	.	.	.	.	.
ENSOARG00000005915	ENSOARP00000006340	0	.	ECHDC2	enoyl-CoA hydratase domain containing 2	2	.	XP_015091648.1 (Vicugna pacos: 91.9% identity in aln 79.8% length of target)	11	2	18.2	7	1	90.9	enoyl-CoA hydratase domain-containing protein 2, mitochondrial	Enoyl-CoA hydratase domain-containing protein 2, mitochondrial	0	0	ENSOARG00000017947/CARD6	.	.
ENSOARG00000005925	ENSOARP00000006349	1	ENSOARG00000004877	RPL37	ribosomal protein L37	1	NP_000988.1 (100.0% identity in aln 100.0% length of target)	.	83	1	1.2	180	1	77.1	60S ribosomal protein L37	60S ribosomal protein L37-like | 60S ribosomal protein L37-like protein | ribosomal protein L37 S homeolog	0	0	.	.	.
ENSOARG00000005934	ENSOARP00000006359	6	ENSOARG00000003480, ENSOARG00000005024, ENSOARG00000008109, ENSOARG00000014076, ENSOARG00000014324, ENSOARG00000019540	RPL23A	ribosomal protein L23a	1	NP_000975.2 (96.8% identity in aln 100.0% length of target)	XP_005675880.1 (Capra hircus: 96.8% identity in aln 100.0% length of target) | XP_006185001.1 (Camelus ferus: 93.6% identity in aln 100.0% length of target)	56	3	5.4	83	2	82.1	60S ribosomal protein L23a	60S ribosomal protein L23a-like | homology to rat ribosomal protein L23 | Rpl23a protein | ribosomal protein L23a, isoform CRA_a | 60S ribosomal protein L23a-like isoform 1	.	.	.	.	.
ENSOARG00000005943	ENSOARP00000006366	0	.	PABPC1L2A	poly(A) binding protein cytoplasmic 1 like 2A	1	NP_001012995.1 (99.0% identity in aln 100.0% length of target)	XP_012028221.1 (Ovis aries musimon: 100.0% identity in aln 100.0% length of target)	38	1	2.6	68	1	86.8	polyadenylate-binding protein 1-like 2	polyadenylate-binding protein 1-like 2-like | PABPC1L2B protein | polyadenylate-binding protein, cytoplasmic and nuclear-like	0	0	.	.	.
ENSOARG00000005948	ENSOARP00000006371	0	.	PSMB6	proteasome subunit beta 6	1	.	XP_006060155.1 (Bubalus bubalis: 95.4% identity in aln 100.0% length of target) | XP_006180453.1 (Camelus ferus: 93.3% identity in aln 99.6% length of target) | XP_006217629.1 (Vicugna pacos: 92.0% identity in aln 99.6% length of target)	66	6	9.1	68	5	86.4	proteasome subunit beta type-6	proteasome subunit beta type-6 precursor | proteasome subunit beta type 6 | proteasome subunit beta type-6 isoform 1 precursor | proteasome subunit beta type-6-like | proteasome subunit beta type-6 isoform 1 | Proteasome subunit beta type-6 | proteasome subunit Y	.	.	.	.	.
ENSOARG00000005962	ENSOARP00000006386	1	ENSOARG00000005946	FBXO27	F-box protein 27	1	.	XP_011986703.1 (Ovis aries musimon: 99.251% identity in aln 90.2% length of target)XP_011986703.1 (Ovis aries musimon: 99.3% identity in aln 90.2% length of target) | XP_005956452.1 (Pantholops hodgsonii: 91.2% identity in aln 98.5% length of target)	2	2	100	1	2	100	F-box only protein 27-like	.	.	.	.	.	.
ENSOARG00000005964	ENSOARP00000006395	0	.	BBS1	Bardet-Biedl syndrome 1	1	.	XP_011972727.1 (Ovis aries musimon: 99.0% identity in aln 100.0% length of target) | XP_013831491.1 (Capra hircus: 98.7% identity in aln 100.0% length of target) | XP_014336233.1 (Bos mutus: 96.5% identity in aln 100.0% length of target) | XP_006044428.1 (Bubalus bubalis: 96.6% identity in aln 100.0% length of target) | XP_006210727.1 (Vicugna pacos: 90.2% identity in aln 98.0% length of target) …	8	7	87.5	5	6	100	Bardet-Biedl syndrome 1 protein	.	.	.	.	.	.
ENSOARG00000005982	ENSOARP00000006406	0	.	PAICS	phosphoribosylaminoimidazole carboxylase; phosphoribosylaminoimidazolesuccinocarboxamide synthase	1	.	XP_012008972.1 (Ovis aries musimon: 99.1% identity in aln 99.8% length of target) | XP_013820100.1 (Capra hircus: 98.8% identity in aln 99.8% length of target) | NP_991382.2 (Bos taurus: 97.6% identity in aln 99.8% length of target) | XP_006058412.1 (Bubalus bubalis: 97.4% identity in aln 99.8% length of target) | XP_006177404.1 (Camelus ferus: 94.5% identity in aln 99.8% length of target) | XP_0…	111	21	18.9	66	7	91	multifunctional protein ADE2	Multifunctional protein ADE2 | Homo sapiens phosphoribosylaminoimidazole carboxylase, phosphoribosylaminoimidazole succinocarboxamide synthetase | phosphoribosylaminoimidazole carboxylase/phosphoribosylaminoimidazole succinocarboxamide synthetase | phosphoribosylaminoimidazole carboxylase, phosphoribosylaminoimidazole succinocarboxamide synthetase, isoform CRA_a | phosphoribosylaminoimidazole car…	0	0	.	.	.
ENSOARG00000006021	ENSOARP00000006448	2	ENSOARG00000004188, ENSOARG00000017854	PRELID1	PRELI domain containing 1	1	.	XP_005682809.1 (Capra hircus: 98.6% identity in aln 98.2% length of target) | XP_006183946.1 (Camelus ferus: 95.7% identity in aln 96.3% length of target) | XP_006199004.1 (Vicugna pacos: 96.2% identity in aln 96.3% length of target)	44	3	6.8	49	3	88.6	PRELI domain-containing protein 1, mitochondrial	PRELI domain-containing protein 1, mitochondrial-like | PRELI domain-containing protein 1, mitochondrial isoform 1 precursor | PRELI domain-containing protein 1, mitochondrial precursor | PRELI | PRELI domain-containing protein 1, mitochondrial-like isoform 1	0	0	.	.	.
ENSOARG00000006035	ENSOARP00000006460	10	ENSOARG00000000975, ENSOARG00000001105, ENSOARG00000004460, ENSOARG00000004995, ENSOARG00000006818, ENSOARG00000008467, ENSOARG00000015615, ENSOARG00000018407, ENSOARG00000018456, ENSOARG00000019908	RPS15A	ribosomal protein S15a	1	NP_001010.2 (95.4% identity in aln 100.0% length of target)	XP_011984926.1 (Ovis aries musimon: 98.5% identity in aln 100.0% length of target) | XP_005899584.1 (Bos mutus: 94.6% identity in aln 100.0% length of target) | XP_006049511.1 (Bubalus bubalis: 92.3% identity in aln 100.0% length of target) | XP_005958044.1 (Pantholops hodgsonii: 95.4% identity in aln 100.0% length of target)	85	10	11.8	158	4	87.1	40S ribosomal protein S15A	ADP-ribosylation factor-like protein 6-interacting protein 1 | 30S ribosomal protein S8 | hCG1994130, isoform CRA_b | 40S ribosomal protein S15 | ribosomal protein S15a, isoform CRA_b | mCG50271 | Chain a, M48s Late-stage Initiation Complex, Purified From Rabbit Reticulocytes Lysates, Displaying Eif2 Ternary Complex And Eif3 I And G Subunits Relocated To The Intersubunit Face | rCG40707, isoform …	0	0	.	.	.
ENSOARG00000006036	ENSOARP00000006462	0	.	NFU1	NFU1 iron-sulfur cluster scaffold	3	.	XP_005893649.1 (Bos mutus: 90.7% identity in aln 54.6% length of target)	10	6	60	8	5	80	NFU1 iron-sulfur cluster scaffold homolog, mitochondrial	NFU1 iron-sulfur cluster scaffold homolog, mitochondrial-like isoform 1 | NFU1 iron-sulfur cluster scaffold homolog, mitochondrial-like isoform 2	.	.	.	.	.
ENSOARG00000006052	ENSOARP00000006481	0	.	RPL4	ribosomal protein L4	8	.	.	0	0	0	0	0	0	.	.	0	0	.	.	.
ENSOARG00000006074	ENSOARP00000006507	0	.	BTF3	transcription factor BTF3	8	.	.	0	0	0	0	0	0	.	.	0	0	.	.	.
ENSOARG00000006089	ENSOARP00000006523	0	.	CCT2	chaperonin containing TCP1 subunit 2	8	.	.	0	0	0	0	0	0	.	.	0	0	.	.	.
ENSOARG00000006143	ENSOARP00000006577	0	.	EPS8L2	EPS8 like 2	2	.	XP_013831562.1 (Capra hircus: 99.4% identity in aln 87.4% length of target)	21	5	23.8	15	4	95.2	epidermal growth factor receptor kinase substrate 8-like protein 2	EPS8L2 protein	0	0	ENSOARG00000006182/ENSBTAG00000037505	.	ENSOARG00000006171/OR52E5
ENSOARG00000006158	ENSOARP00000006594	1	ENSOARG00000007653	OR52E4	olfactory receptor family 52 subfamily E member 4	1	.	XP_012019965.1 (Ovis aries musimon: 99.7% identity in aln 100.0% length of target) | XP_005902625.1 (Bos mutus: 96.2% identity in aln 100.0% length of target) | XP_002687004.1 (Bos taurus: 97.1% identity in aln 100.0% length of target) | XP_006053470.1 (Bubalus bubalis: 98.7% identity in aln 100.0% length of target) | XP_005984090.1 (Pantholops hodgsonii: 95.5% identity in aln 97.8% length of tar…	20	8	40	12	4	80	olfactory receptor 52E4	olfactory receptor Olr87 (predicted) | olfactory receptor 604 | Olfactory receptor 52E4 | olfactory receptor 604 (predicted)	0	0	.	.	ENSOARG00000006085/COG3
ENSOARG00000006165	ENSOARP00000006602	0	.	SLC25A30	solute carrier family 25 member 30	8	.	.	0	0	0	0	0	0	.	.	0	0	.	.	.
ENSOARG00000006177	ENSOARP00000006614	0	.	TMEM80	transmembrane protein 80	1	.	XP_014333530.1 (Bos mutus: 91.1% identity in aln 100.0% length of target) | XP_015316852.1 (Bos taurus: 91.9% identity in aln 100.0% length of target)	10	10	100	4	5	100	transmembrane protein 80	.	0	0	.	.	.
ENSOARG00000006223	ENSOARP00000006661	0	.	CUL7	cullin 7	8	.	.	0	0	0	0	0	0	.	.	.	.	.	.	.
ENSOARG00000006243	ENSOARP00000006686	0	.	PRPF18	pre-mRNA processing factor 18	1	.	XP_005214233.1 (Bos taurus: 100.0% identity in aln 100.0% length of target) | XP_010858250.1 (Bison bison bison: 99.7% identity in aln 99.1% length of target) | XP_014415260.1 (Camelus ferus: 99.1% identity in aln 100.0% length of target)	50	3	6	56	3	98	pre-mRNA-splicing factor 18	PRP18 pre-mRNA processing factor 18 homolog (yeast), isoform CRA_a	.	.	.	.	.
ENSOARG00000006245	ENSOARP00000006685	1	.	OR51G2	OR51G2	1	.	XP_012019986.1 (Ovis aries musimon: 99.4% identity in aln 100.0% length of target) | XP_005689879.1 (Capra hircus: 99.4% identity in aln 100.0% length of target) | XP_005911617.1 (Bos mutus: 99.4% identity in aln 100.0% length of target) | XP_006183152.1 (Camelus ferus: 91.7% identity in aln 100.0% length of target) | XP_006203483.1 (Vicugna pacos: 91.4% identity in aln 100.0% length of target) |…	32	6	18.8	26	6	90.6	olfactory receptor 51G2	cOR51P3 olfactory receptor family 51 subfamily P-like (predicted) | olfactory receptor 51G2-like protein | cOR51P3 olfactory receptor family 51 subfamily P-like	.	.	.	.	.
ENSOARG00000006247	ENSOARP00000006687	0	.	DACH2	dachshund family transcription factor 2	8	.	.	0	0	0	0	0	0	.	.	5	-1,+4	.	C9orf43,POLE3,ALAD,HDHD3,BSPRY,WDR31	.
ENSOARG00000006255	ENSOARP00000006697	0	.	POLE3	DNA polymerase epsilon 3, accessory subunit	1	.	NP_001029562.1 (Bos taurus: 100.0% identity in aln 100.0% length of target) | XP_006211419.1 (Vicugna pacos: 99.3% identity in aln 100.0% length of target)	33	2	6.1	59	2	97	DNA polymerase epsilon subunit 3	DNA polymerase epsilon p17 subunit	.	.	.	.	.
ENSOARG00000006278	ENSOARP00000006722	2	ENSOARG00000006296, ENSOARG00000007499	OR51A4	olfactory receptor family 51 subfamily A member 4	1	.	XP_012019983.1 (Ovis aries musimon: 99.7% identity in aln 100.0% length of target) | XP_005689987.1 (Capra hircus: 97.8% identity in aln 100.0% length of target) | XP_005911590.2 (Bos mutus: 94.6% identity in aln 100.0% length of target) | XP_006078709.1 (Bubalus bubalis: 95.2% identity in aln 100.0% length of target) | XP_010831427.1 (Bison bison bison: 95.2% identity in aln 100.0% length of tar…	7	6	85.7	5	6	100	olfactory receptor 51A4	.	.	.	.	.	.
ENSOARG00000006296	ENSOARP00000006741	2	ENSOARG00000006278, ENSOARG00000007499	OR51A4	olfactory receptor family 51 subfamily A member 4	1	.	XP_004016733.1 (Ovis aries: 100.000% identity in aln 99.7% length of target)XP_005689881.1 (Capra hircus: 99.7% identity in aln 99.7% length of target) | XP_002693423.1 (Bos taurus: 95.8% identity in aln 99.7% length of target) | XP_010845996.1 (Bison bison bison: 98.1% identity in aln 99.7% length of target)	5	5	100	3	4	100	olfactory receptor 51A4	.	.	.	.	.	.
ENSOARG00000006310	ENSOARP00000006756	0	.	WFDC3	WAP four-disulfide core domain 3	3	.	XP_005688663.1 (Capra hircus: 99.3% identity in aln 72.1% length of target) | XP_005897605.1 (Bos mutus: 90.8% identity in aln 72.1% length of target) | NP_001098436.2 (Bos taurus: 90.1% identity in aln 72.1% length of target) | XP_006051406.1 (Bubalus bubalis: 90.8% identity in aln 72.1% length of target) | XP_010833324.1 (Bison bison bison: 90.8% identity in aln 72.1% length of target) | XP_005…	9	7	77.8	5	6	88.9	WAP four-disulfide core domain protein 3	WFDC3 protein	.	.	.	.	.
ENSOARG00000006325	ENSOARP00000006775	0	.	DTD2	D-tyrosyl-tRNA deacylase 2 (putative)	1	.	XP_006191326.1 (Camelus ferus: 95.2% identity in aln 100.0% length of target) | XP_006207633.1 (Vicugna pacos: 94.6% identity in aln 100.0% length of target) | XP_005961970.1 (Pantholops hodgsonii: 99.4% identity in aln 100.0% length of target)	37	4	10.8	38	4	97.3	probable D-tyrosyl-tRNA(Tyr) deacylase 2	probable D-tyrosyl-tRNA(Tyr) deacylase 2-like	5	-1,+4	.	PRPF4,CDC26,SLC31A1,FKBP15,SLC31A2,ZFP37	ENSOARG00000006419/ENSBTAG00000047990
ENSOARG00000006332	ENSOARP00000006785	1	ENSOARG00000003464	CDC26	cell division cycle 26	1	NP_644815.1 (92.9% identity in aln 100.0% length of target)	NP_001071621.1 (Bos taurus: 98.8% identity in aln 100.0% length of target) | XP_006195070.1 (Camelus ferus: 95.3% identity in aln 100.0% length of target) | XP_005976137.1 (Pantholops hodgsonii: 97.6% identity in aln 100.0% length of target)	79	5	6.3	74	4	96.2	anaphase-promoting complex subunit CDC26	Anaphase-promoting complex subunit CDC26 | anaphase-promoting complex subunit CDC26-like | Chain G, Atomic Structure Of The Human Anaphase-promoting Complex	1	0,+1	.	DYRK1B,LEUTX	.
ENSOARG00000006334	ENSOARP00000006783	0	.	DYRK1B	dual specificity tyrosine phosphorylation regulated kinase 1B	3	.	XP_014962138.1 (Ovis aries musimon: 98.7% identity in aln 57.4% length of target) | XP_013826741.1 (Capra hircus: 98.7% identity in aln 54.1% length of target) | XP_005890621.1 (Bos mutus: 98.4% identity in aln 58.5% length of target) | XP_005218980.1 (Bos taurus: 98.4% identity in aln 57.4% length of target) | XP_006050095.1 (Bubalus bubalis: 98.4% identity in aln 51.1% length of target)	126	14	11.1	56	4	96.8	dual specificity tyrosine-phosphorylation-regulated kinase 1B	IgGFc-binding protein | Dual specificity tyrosine-phosphorylation-regulated kinase 1B | dual specificity tyrosine-phosphorylation-regulated kinase 1B isoform p75 | dual-specificity tyrosine-(Y)-phosphorylation regulated kinase 1b, isoform CRA_b	0	0	.	.	.
ENSOARG00000006350	ENSOARP00000006797	0	.	MTA3	metastasis associated 1 family member 3	8	.	.	0	0	0	0	0	0	.	.	3	-2,+1	.	SETX,NTNG2,MED27,RAPGEF1	ENSOARG00000006654/UCK1
ENSOARG00000006411	ENSOARP00000006859	0	.	MED27	mediator complex subunit 27	4	.	.	171	2	1.2	163	2	77.8	mediator of RNA polymerase II transcription subunit 27	Mediator of RNA polymerase II transcription subunit 27 | mediator of RNA polymerase II transcription subunit 27-like | Mediator complex subunit 27 | hCG1759547 | mediator of RNA polymerase II transcription subunit 27-B | cofactor required for Sp1 transcriptional activation, subunit 8, 34kDa, isoform CRA_d | p37 TRAP/SMCC/PC2 subunit | mediator of RNA polymerase II transcription subunit 27 isoform…	4	-3,+1	.	STN1,SLK,COL17A1,SFR1,CFAP43	.
ENSOARG00000006415	ENSOARP00000006863	1	ENSOARG00000011657	SFR1	SWI5 dependent homologous recombination repair protein 1	1	.	XP_011974919.1 (Ovis aries musimon: 99.2% identity in aln 100.0% length of target) | XP_005698491.1 (Capra hircus: 97.5% identity in aln 100.0% length of target) | XP_014336282.1 (Bos mutus: 95.3% identity in aln 100.0% length of target) | XP_010857704.1 (Bison bison bison: 95.5% identity in aln 100.0% length of target) | XP_005973493.1 (Pantholops hodgsonii: 95.1% identity in aln 100.0% length o…	7	7	100	4	5	100	swi5-dependent recombination DNA repair protein 1 homolog	.	.	.	.	.	.
ENSOARG00000006430	ENSOARP00000006881	0	.	DEFB107A	defensin beta 107A	1	.	XP_006078184.1 (Bubalus bubalis: 93.9% identity in aln 94.3% length of target)	3	2	66.7	4	2	100	beta-defensin 107A	.	.	.	.	.	.
ENSOARG00000006433	ENSOARP00000006884	0	.	DEFB105	DEFB105	1	.	XP_013830805.1 (Capra hircus: 97.5% identity in aln 100.0% length of target) | XP_014336299.1 (Bos mutus: 93.7% identity in aln 100.0% length of target) | XP_010850632.1 (Bison bison bison: 93.7% identity in aln 100.0% length of target)	4	4	100	4	4	100	beta-defensin 105-like	.	.	.	.	.	.
ENSOARG00000006467	ENSOARP00000006922	0	.	TSR2	TSR2, ribosome maturation factor	1	.	XP_012026495.1 (Ovis aries musimon: 99.5% identity in aln 100.0% length of target) | XP_005700950.1 (Capra hircus: 99.0% identity in aln 100.0% length of target) | XP_005897721.1 (Bos mutus: 97.4% identity in aln 100.0% length of target) | NP_001030269.1 (Bos taurus: 97.4% identity in aln 100.0% length of target) | XP_006069058.1 (Bubalus bubalis: 97.9% identity in aln 100.0% length of target) | …	9	6	66.7	6	5	100	pre-rRNA-processing protein TSR2 homolog	.	0	0	ENSOARG00000006457/OR51T1	.	.
ENSOARG00000006475	ENSOARP00000006932	2	ENSOARG00000006490, ENSOARG00000006505	OR51F2	olfactory receptor family 51 subfamily F member 2	1	.	XP_014946027.1 (Ovis aries musimon: 95.2% identity in aln 100.0% length of target) | XP_005689890.1 (Capra hircus: 93.9% identity in aln 100.0% length of target) | XP_005902262.1 (Bos mutus: 93.0% identity in aln 100.0% length of target) | XP_015330240.1 (Bos taurus: 94.6% identity in aln 100.0% length of target) | XP_006062091.1 (Bubalus bubalis: 93.3% identity in aln 100.0% length of target) | …	15	11	73.3	7	6	100	olfactory receptor 51F2	.	0	0	.	.	.
ENSOARG00000006490	ENSOARP00000006946	2	ENSOARG00000006475, ENSOARG00000006505	OR51F2	olfactory receptor family 51 subfamily F member 2	1	.	XP_014946027.1 (Ovis aries musimon: 93.9% identity in aln 99.4% length of target) | XP_005689890.1 (Capra hircus: 98.4% identity in aln 99.4% length of target) | XP_005902262.1 (Bos mutus: 92.3% identity in aln 99.4% length of target) | XP_015330240.1 (Bos taurus: 92.3% identity in aln 99.4% length of target) | XP_006062091.1 (Bubalus bubalis: 95.2% identity in aln 99.4% length of target) | XP_01…	39	13	33.3	28	8	97.4	olfactory receptor 51F2	hCG2044603	0	0	.	.	.
ENSOARG00000006505	ENSOARP00000006964	2	ENSOARG00000006475, ENSOARG00000006490	OR51F2	olfactory receptor family 51 subfamily F member 2	1	.	XP_012022475.1 (Ovis aries musimon: 98.4% identity in aln 100.0% length of target) | XP_005689891.1 (Capra hircus: 97.1% identity in aln 100.0% length of target) | XP_005911404.1 (Bos mutus: 96.2% identity in aln 100.0% length of target) | XP_015330237.1 (Bos taurus: 96.2% identity in aln 100.0% length of target) | XP_006062092.1 (Bubalus bubalis: 95.2% identity in aln 95.2% length of target) | X…	13	6	46.2	8	5	92.3	olfactory receptor 51F2	Olfactory receptor 51F2	0	0	ENSOARG00000006552/SCRN3	.	ENSOARG00000000351/SP9
ENSOARG00000006529	ENSOARP00000006986	0	.	CIR1	corepressor interacting with RBPJ, 1	3	.	XP_012028672.2 (Ovis aries musimon: 99.4% identity in aln 68.0% length of target)	93	6	6.5	72	5	89.2	corepressor interacting with RBPJ 1	1700023B02Rik protein | corepressor interacting with RBPJ 1-like | CIR protein | Similar to RIKEN cDNA 1700023B02 gene | CIR1 | Unknown (protein for IMAGE:8387709) | CBF1 interacting corepressor CIR	.	.	.	.	.
ENSOARG00000006572	ENSOARP00000007035	0	.	TEX40	testis expressed 40	3	.	XP_014951288.1 (Ovis aries musimon: 99.206% identity in aln 64.3% length of target)XP_014951288.1 (Ovis aries musimon: 99.2% identity in aln 64.3% length of target)	1	1	100	0	1	100	testis-expressed sequence 40 protein	.	0	0	.	.	.
ENSOARG00000006579	ENSOARP00000007044	1	.	OR52M1	OR52M1	1	.	XP_012022456.1 (Ovis aries musimon: 99.7% identity in aln 100.0% length of target) | XP_005689996.1 (Capra hircus: 98.7% identity in aln 100.0% length of target) | XP_005909959.1 (Bos mutus: 98.7% identity in aln 100.0% length of target) | XP_006062095.1 (Bubalus bubalis: 98.4% identity in aln 100.0% length of target) | XP_005984104.1 (Pantholops hodgsonii: 97.5% identity in aln 100.0% length of …	25	5	20	19	5	100	olfactory receptor 52M1	.	0	0	ENSOARG00000006948/BACE2	.	.
ENSOARG00000006595	ENSOARP00000007067	1	.	DSCAM	DSCAM	1	.	XP_013824895.1 (Capra hircus: 99.8% identity in aln 90.7% length of target) | XP_006175424.1 (Camelus ferus: 98.3% identity in aln 91.7% length of target) | XP_005964498.1 (Pantholops hodgsonii: 99.5% identity in aln 93.5% length of target)	73	6	8.2	56	6	86.3	Down syndrome cell adhesion molecule-like protein 1	Down syndrome cell adhesion molecule-like protein 1 homolog | Down syndrome cell adhesion molecule isoform B | KIAA1132 protein | Down syndrome cell adhesion molecule like-protein 1a | RecName: Full=Down syndrome cell adhesion molecule-like protein 1; AltName: Full=Down syndrome cell adhesion molecule 2; Flags: Precursor | Down syndrome cell adhesion molecule isoform C | Down syndrome cell adhesi…	.	.	.	.	.
ENSOARG00000006628	ENSOARP00000007095	1	.	OR51G2	OR51G2	1	.	XP_012022461.1 (Ovis aries musimon: 99.4% identity in aln 100.0% length of target) | XP_005689902.1 (Capra hircus: 97.8% identity in aln 99.7% length of target) | XP_005909954.1 (Bos mutus: 96.5% identity in aln 99.7% length of target) | XP_015330242.1 (Bos taurus: 96.2% identity in aln 99.7% length of target) | XP_006062080.1 (Bubalus bubalis: 96.2% identity in aln 99.7% length of target) | XP_0…	40	9	22.5	34	8	87.5	olfactory receptor 51G2	olfactory receptor 51L1-like | olfactory receptor 51A4 | Olfactory receptor 51L1 | olfactory receptor 51H1-like	0	0	.	.	.
ENSOARG00000006646	ENSOARP00000007113	1	.	OR52B4	OR52B4	1	.	XP_005689905.1 (Capra hircus: 99.7% identity in aln 99.4% length of target) | XP_006062084.1 (Bubalus bubalis: 98.1% identity in aln 99.4% length of target) | XP_010858157.1 (Bison bison bison: 98.1% identity in aln 99.4% length of target) | XP_006181726.1 (Camelus ferus: 90.4% identity in aln 99.4% length of target) | XP_006203630.1 (Vicugna pacos: 93.3% identity in aln 99.4% length of target) |…	17	7	41.2	14	7	100	olfactory receptor 52B4	.	8	0,+8	ENSOARG00000006649/ENSBTAG00000030960	PTGR1,ZNF483,KIAA0368,OR2K2,LPAR1,MUSK,SVEP1,TXNDC8,TXN	.
ENSOARG00000006659	ENSOARP00000007131	0	.	PTGR1	prostaglandin reductase 1	1	.	XP_012009292.1 (Ovis aries musimon: 99.7% identity in aln 100.0% length of target) | XP_005684360.1 (Capra hircus: 98.8% identity in aln 100.0% length of target) | XP_005906639.1 (Bos mutus: 96.0% identity in aln 100.0% length of target) | NP_001030358.1 (Bos taurus: 95.7% identity in aln 100.0% length of target) | XP_006063726.1 (Bubalus bubalis: 97.3% identity in aln 100.0% length of target) | …	7	7	100	5	6	100	prostaglandin reductase 1	.	9	0,+9	.	CDH23,PSAP,CHST3,SPOCK2,ASCC1,ANAPC16,DDIT4,DNAJB12,MICU1,MCU	.
ENSOARG00000006661	ENSOARP00000007171	0	.	CDH23	cadherin-23	8	.	.	0	0	0	0	0	0	.	.	8	-7,+1	.	TXN,TXNDC8,SVEP1,MUSK,LPAR1,OR2K2,KIAA0368,ZNF483,PTGR1	ENSOARG00000006649/ENSBTAG00000030960
ENSOARG00000006672	ENSOARP00000007142	0	.	ZNF483	zinc finger protein 483	4	.	.	7	6	85.7	5	6	85.7	zinc finger protein 483	Zinc finger protein 483	.	.	.	.	.
ENSOARG00000006686	ENSOARP00000007159	0	.	PI4K2B	phosphatidylinositol 4-kinase type 2 beta	1	.	XP_013820021.1 (Capra hircus: 99.6% identity in aln 100.0% length of target) | XP_005897146.1 (Bos mutus: 98.4% identity in aln 100.0% length of target) | NP_001095534.1 (Bos taurus: 98.2% identity in aln 100.0% length of target) | XP_006042049.1 (Bubalus bubalis: 98.2% identity in aln 100.0% length of target) | XP_010838221.1 (Bison bison bison: 97.7% identity in aln 100.0% length of target) | X…	9	7	77.8	6	6	88.9	phosphatidylinositol 4-kinase type 2-beta	Phosphatidylinositol 4-kinase type 2-beta	.	.	.	.	.
ENSOARG00000006694	ENSOARP00000007167	0	.	NDUFC2	NADH:ubiquinone oxidoreductase subunit C2	1	.	XP_005908130.1 (Bos mutus: 94.2% identity in aln 100.0% length of target) | NP_788815.1 (Bos taurus: 93.3% identity in aln 100.0% length of target) | XP_006077453.1 (Bubalus bubalis: 96.7% identity in aln 100.0% length of target)	4	4	100	4	3	100	NADH dehydrogenase [ubiquinone] 1 subunit C2	.	0	0	ENSOARG00000006682/ENSBTAG00000039467	.	ENSOARG00000001126/OR52M1
ENSOARG00000006696	ENSOARP00000007169	0	.	OR52K1	olfactory receptor family 52 subfamily K member 1	1	.	XP_012025211.1 (Ovis aries musimon: 99.1% identity in aln 97.9% length of target) | XP_005690000.1 (Capra hircus: 97.6% identity in aln 97.9% length of target) | XP_005886718.1 (Bos mutus: 95.7% identity in aln 97.9% length of target) | XP_006043437.1 (Bubalus bubalis: 94.2% identity in aln 97.6% length of target) | XP_010847821.1 (Bison bison bison: 96.0% identity in aln 97.9% length of target) …	8	6	75	7	6	100	olfactory receptor 52K1	.	.	.	.	.	.
ENSOARG00000006700	ENSOARP00000007170	0	.	MXRA7	matrix remodeling associated 7	3	.	XP_011965032.1 (Ovis aries musimon: 100.000% identity in aln 49.2% length of target)XP_005694477.1 (Capra hircus: 97.9% identity in aln 73.1% length of target)	2	2	100	1	2	100	matrix-remodeling-associated protein 7	.	.	.	.	.	.
ENSOARG00000006713	ENSOARP00000007188	0	.	LY6G5B	lymphocyte antigen 6 complex, locus G5B	1	.	XP_005696640.1 (Capra hircus: 99.5% identity in aln 99.5% length of target) | XP_006041982.1 (Bubalus bubalis: 96.9% identity in aln 90.7% length of target) | XP_005965443.1 (Pantholops hodgsonii: 98.0% identity in aln 99.5% length of target)	6	6	100	4	5	83.3	lymphocyte antigen 6 complex locus protein G5b	lymphocyte antigen 6 complex locus protein G5b precursor	2	-2,0	.	ALDH18A1,TCTN3,ENTPD1	.
ENSOARG00000006716	ENSOARP00000007190	0	.	ENTPD1	ectonucleoside triphosphate diphosphohydrolase 1	1	.	XP_005698322.1 (Capra hircus: 98.0% identity in aln 99.8% length of target) | XP_005898896.1 (Bos mutus: 92.6% identity in aln 100.0% length of target) | XP_005225502.1 (Bos taurus: 92.6% identity in aln 100.0% length of target) | XP_006067888.1 (Bubalus bubalis: 93.1% identity in aln 99.0% length of target) | XP_010831300.1 (Bison bison bison: 92.8% identity in aln 100.0% length of target)	15	14	93.3	4	5	93.3	ectonucleoside triphosphate diphosphohydrolase 1	ENTPD1 protein	.	.	.	.	.
ENSOARG00000006724	ENSOARP00000007203	0	.	PSMA1	proteasome subunit alpha 1	1	.	XP_005887610.1 (Bos mutus: 100.0% identity in aln 97.4% length of target) | NP_001030387.1 (Bos taurus: 100.0% identity in aln 100.0% length of target) | XP_005958058.1 (Pantholops hodgsonii: 99.6% identity in aln 100.0% length of target)	67	3	4.5	82	2	77.6	proteasome subunit alpha type-1	Proteasome subunit alpha type-1 | prosomal protein P30-33K | proteasome (prosome, macropain) subunit, alpha type 1, isoform CRA_c | proteasome subunit alpha type-1 isoform 2 | proteasome (prosome, macropain) subunit, alpha type, 1, isoform CRA_b | Proteasome (prosome, macropain) subunit, alpha type, 1 | proteasome subunit alpha type-1 isoform 1 | Chain F, Human Constitutive 20s Proteasome | prote…	1	-1,0	ENSOARG00000006695/ENSBTAG00000048161	OLFM4,PCDH8	ENSOARG00000006784/CNMD
ENSOARG00000006743	ENSOARP00000007221	0	.	PCDH8	protocadherin-8	6	.	XP_011998787.1 (Ovis aries musimon: 99.608% identity in aln 23.8% length of target)	2	2	100	1	2	50	protocadherin-8	.	0	0	.	.	ENSOARG00000010968/NEU3
ENSOARG00000006751	ENSOARP00000007230	1	ENSOARG00000006770	OR2AT4	olfactory receptor family 2 subfamily AT member 4	1	.	XP_012006400.1 (Ovis aries musimon: 95.6% identity in aln 98.8% length of target) | XP_005903299.1 (Bos mutus: 91.5% identity in aln 98.8% length of target) | XP_010811007.1 (Bos taurus: 92.1% identity in aln 98.8% length of target) | XP_006074154.1 (Bubalus bubalis: 90.2% identity in aln 98.8% length of target) | XP_010845878.1 (Bison bison bison: 92.4% identity in aln 98.8% length of target) | …	7	7	100	4	5	100	olfactory receptor 2AT4	.	0	0	.	.	.
ENSOARG00000006770	ENSOARP00000007249	1	ENSOARG00000006751	OR2AT4	olfactory receptor family 2 subfamily AT member 4	1	.	XP_012006400.1 (Ovis aries musimon: 92.038% identity in aln 97.8% length of target)XP_012006400.1 (Ovis aries musimon: 92.0% identity in aln 97.8% length of target)	1	1	100	0	1	100	olfactory receptor 2AT4	.	.	.	.	.	.
ENSOARG00000006777	ENSOARP00000007259	0	.	TMEM170A	transmembrane protein 170A	1	XP_016878430.1 (99.0% identity in aln 100.0% length of target)	XP_013826420.1 (Capra hircus: 98.0% identity in aln 100.0% length of target) | XP_014422149.1 (Camelus ferus: 98.0% identity in aln 100.0% length of target)	119	4	3.4	98	4	83.2	transmembrane protein 170A	Transmembrane protein 170A | transmembrane protein 170A isoform 3 | transmembrane protein 170A isoform 1 | DNA segment, Chr 8, Brigham & Women's Genetics 1414 expressed | transmembrane protein | LOC124491, isoform CRA_a	.	.	.	.	.
ENSOARG00000006795	ENSOARP00000007276	0	.	SC5D	sterol-C5-desaturase	2	.	XP_012019556.2 (Ovis aries musimon: 98.947% identity in aln 87.6% length of target)XP_012019556.2 (Ovis aries musimon: 98.9% identity in aln 87.6% length of target)	1	1	100	0	1	100	lathosterol oxidase	.	0	0	ENSOARG00000007086/ZNF782	.	ENSOARG00000006980/AAED1
ENSOARG00000006818	ENSOARP00000007301	10	ENSOARG00000000975, ENSOARG00000001105, ENSOARG00000004460, ENSOARG00000004995, ENSOARG00000006035, ENSOARG00000008467, ENSOARG00000015615, ENSOARG00000018407, ENSOARG00000018456, ENSOARG00000019908	RPS15A	ribosomal protein S15a	1	.	XP_005971507.1 (Pantholops hodgsonii: 95.385% identity in aln 100.0% length of target)XP_005971507.1 (Pantholops hodgsonii: 95.4% identity in aln 100.0% length of target)	1	1	100	1	1	100	40S ribosomal protein S15A	.	.	.	.	.	.
ENSOARG00000006835	ENSOARP00000007320	0	.	FAM107B	family with sequence similarity 107 member B	1	.	XP_015329481.1 (Bos taurus: 96.7% identity in aln 99.3% length of target) | XP_010858253.1 (Bison bison bison: 98.0% identity in aln 99.3% length of target)	114	10	8.8	60	6	86.8	protein FAM107B	Protein FAM107B | neurofilament heavy polypeptide | serine/threonine-protein kinase GIN4 | involucrin-like | Zona pellucida sperm-binding protein 2 | protein FAM107B isoform c | stress response protein NST1 | protein FAM107B isoform b	0	0	.	.	.
ENSOARG00000006841	ENSOARP00000007331	0	.	ENTPD1	ectonucleoside triphosphate diphosphohydrolase 1	8	.	.	0	0	0	0	0	0	.	.	.	.	.	.	.
ENSOARG00000006847	ENSOARP00000007332	0	.	TMEM231	transmembrane protein 231	1	.	XP_005691862.1 (Capra hircus: 98.1% identity in aln 100.0% length of target) | NP_001094548.1 (Bos taurus: 97.8% identity in aln 100.0% length of target) | XP_006063412.1 (Bubalus bubalis: 97.8% identity in aln 100.0% length of target) | XP_006193533.1 (Camelus ferus: 90.5% identity in aln 99.4% length of target) | XP_006207559.1 (Vicugna pacos: 90.5% identity in aln 100.0% length of target) | XP…	29	7	24.1	25	7	100	transmembrane protein 231	.	2	0,+2	.	PRR22,CATSPERD,LONP1	ENSOARG00000007383/ENSBTAG00000001794
ENSOARG00000006861	ENSOARP00000007345	0	.	PRR22	proline rich 22	8	.	.	0	0	0	0	0	0	.	.	0	0	.	.	.
ENSOARG00000006865	ENSOARP00000007351	1	.	ATOX1	ATOX1	1	.	.	4	2	50	6	2	75	copper transport protein ATOX1	Copper transport protein ATOX1	.	.	.	.	.
ENSOARG00000006882	ENSOARP00000007367	0	.	HOXB8	homeobox B8	1	.	XP_002695988.4 (Bos taurus: 97.1% identity in aln 92.1% length of target)	49	2	4.1	88	2	91.8	homeobox protein Hox-B8	homeobox protein | homeobox protein Hox-B8-like | Homeobox protein Hox-B8	4	0,+4	ENSOARG00000006909/ENSBTAG00000037410	IQCF3,IQCF2,IQCF5,IQCF1,RRP9	ENSOARG00000006651/PARP3
ENSOARG00000006886	ENSOARP00000007373	1	ENSOARG00000015732	IQCF3	IQ motif containing F3	1	.	XP_004018471.2 (Ovis aries: 100.000% identity in aln 100.0% length of target)	1	1	100	0	1	100	IQ domain-containing protein F3	.	.	.	.	.	.
ENSOARG00000006904	ENSOARP00000007388	1	ENSOARG00000018921	OR56A4	olfactory receptor family 56 subfamily A member 4	1	.	XP_012021450.1 (Ovis aries musimon: 99.0% identity in aln 99.0% length of target) | XP_005689832.1 (Capra hircus: 92.3% identity in aln 99.0% length of target) | XP_005896344.1 (Bos mutus: 93.2% identity in aln 99.0% length of target) | XP_003587012.1 (Bos taurus: 92.6% identity in aln 99.0% length of target) | XP_006053154.1 (Bubalus bubalis: 91.0% identity in aln 99.0% length of target) | XP_01…	21	11	52.4	10	5	100	olfactory receptor 56A4	.	.	.	.	.	.
ENSOARG00000006911	ENSOARP00000007401	0	.	SLFN12L	schlafen family member 12 like	1	.	XP_011969985.1 (Ovis aries musimon: 99.7% identity in aln 100.0% length of target) | XP_013827306.1 (Capra hircus: 98.2% identity in aln 100.0% length of target) | XP_006045422.1 (Bubalus bubalis: 95.4% identity in aln 100.0% length of target) | XP_010859805.1 (Bison bison bison: 94.9% identity in aln 100.0% length of target)	5	4	80	4	4	100	schlafen family member 12-like	.	.	.	.	.	.
ENSOARG00000006917	ENSOARP00000007406	1	.	OR56A3	OR56A3	1	.	XP_012021457.1 (Ovis aries musimon: 99.4% identity in aln 98.7% length of target) | XP_005689851.1 (Capra hircus: 98.4% identity in aln 98.7% length of target) | XP_005896355.1 (Bos mutus: 94.6% identity in aln 98.7% length of target) | XP_006053162.1 (Bubalus bubalis: 96.8% identity in aln 98.7% length of target) | XP_010848355.1 (Bison bison bison: 95.9% identity in aln 98.7% length of target)	8	5	62.5	6	5	100	olfactory receptor 56A3	.	0	0	.	.	.
ENSOARG00000006921	ENSOARP00000007411	1	.	OR10T2	OR10T2	1	.	XP_012018270.1 (Ovis aries musimon: 99.7% identity in aln 100.0% length of target) | XP_005677375.1 (Capra hircus: 98.1% identity in aln 100.0% length of target) | XP_005901168.1 (Bos mutus: 98.1% identity in aln 100.0% length of target) | XP_006052565.1 (Bubalus bubalis: 97.8% identity in aln 100.0% length of target) | XP_010845212.1 (Bison bison bison: 97.8% identity in aln 100.0% length of tar…	47	8	17	42	8	95.7	olfactory receptor 10T2	Olfactory receptor 10T2 | olfactory receptor 10R2-like	5	-3,+2	ENSOARG00000007317/ENSBTAG00000030876	NOM1,LMBR1,RNF32,SHH,RBM33,CNPY1	.
ENSOARG00000006942	ENSOARP00000007435	0	.	SHH	sonic hedgehog	2	.	XP_014335701.1 (Bos mutus: 94.9% identity in aln 84.0% length of target)	67	4	6	57	4	80.6	sonic hedgehog protein	sonic hedgehog protein precursor | sonic hedgehog protein-like | sonic hedgehog homolog (Drosophila) | Sonic hedgehog protein | sonic hedgehog protein preproprotein | sonic hedgehog protein isoform 1 preproprotein | Sonic hedgehog gene	.	.	.	.	.
ENSOARG00000006955	ENSOARP00000007446	1	.	OR10K1	OR10K1	1	.	XP_012018246.1 (Ovis aries musimon: 90.3% identity in aln 98.7% length of target) | XP_005677374.1 (Capra hircus: 98.7% identity in aln 99.4% length of target) | XP_010845213.1 (Bison bison bison: 97.1% identity in aln 99.4% length of target) | XP_005957484.1 (Pantholops hodgsonii: 97.1% identity in aln 99.4% length of target)	7	6	85.7	4	4	100	olfactory receptor 10K1	.	.	.	.	.	.
ENSOARG00000006970	ENSOARP00000007461	0	.	MIA	melanoma inhibitory activity	1	.	XP_011986463.1 (Ovis aries musimon: 99.2% identity in aln 99.2% length of target) | XP_005692478.1 (Capra hircus: 98.5% identity in aln 99.2% length of target) | XP_005890666.2 (Bos mutus: 91.5% identity in aln 99.2% length of target) | XP_010847552.1 (Bison bison bison: 97.7% identity in aln 99.2% length of target) | XP_005963569.1 (Pantholops hodgsonii: 98.5% identity in aln 99.2% length of tar…	15	9	60	11	6	86.7	melanoma-derived growth regulatory protein	ras-related protein Rab-4B-like | melanoma-derived growth regulatory protein precursor	.	.	.	.	.
ENSOARG00000006978	ENSOARP00000007477	0	.	RAB4B	RAB4B, member RAS oncogene family	2	.	XP_005963573.1 (Pantholops hodgsonii: 100.0% identity in aln 89.3% length of target)	82	2	2.4	117	2	82.9	ras-related protein Rab-4B	ras-related protein Rab-4B-like | Ras-related protein Rab-4B | ras-related protein rab-4b | rab4b | GTP-binding protein RAB4 | unknown	3	-2,+1	ENSOARG00000007886/CHCHD6	PLXNA1,TPRA1,MCM2,PODXL2	ENSOARG00000006803/ABTB1
ENSOARG00000006991	ENSOARP00000007496	0	.	MCM2	minichromosome maintenance complex component 2	8	.	.	0	0	0	0	0	0	.	.	.	.	.	.	.
ENSOARG00000007015	ENSOARP00000007517	0	.	CYB5RL	cytochrome b5 reductase like	1	.	XP_005678430.1 (Capra hircus: 98.4% identity in aln 100.0% length of target) | XP_005897299.2 (Bos mutus: 97.1% identity in aln 100.0% length of target) | XP_005204609.1 (Bos taurus: 97.8% identity in aln 100.0% length of target) | XP_006049658.1 (Bubalus bubalis: 95.5% identity in aln 100.0% length of target) | XP_010845431.1 (Bison bison bison: 97.5% identity in aln 100.0% length of target) | X…	14	8	57.1	10	6	92.9	NADH-cytochrome b5 reductase-like	NADH-cytochrome b5 reductase-like protein	.	.	.	.	.
ENSOARG00000007018	ENSOARP00000007523	0	.	NDUFA11	NADH:ubiquinone oxidoreductase subunit A11	1	.	XP_005682563.1 (Capra hircus: 98.6% identity in aln 100.0% length of target) | NP_783649.1 (Bos taurus: 95.7% identity in aln 100.0% length of target) | XP_006067247.1 (Bubalus bubalis: 97.9% identity in aln 100.0% length of target) | XP_005962236.1 (Pantholops hodgsonii: 98.6% identity in aln 100.0% length of target)	10	5	50	11	5	100	NADH dehydrogenase [ubiquinone] 1 alpha subcomplex subunit 11	.	1	-1,0	ENSOARG00000007304/HES4	ISG15,AGRN	ENSOARG00000006702/ENSBTAG00000024492
ENSOARG00000007039	ENSOARP00000007547	0	.	AGRN	agrin	8	.	.	0	0	0	0	0	0	.	.	.	.	.	.	.
ENSOARG00000007044	ENSOARP00000007552	0	.	OC90	otoconin-90	8	.	.	0	0	0	0	0	0	.	.	0	0	.	.	.
ENSOARG00000007072	ENSOARP00000007587	1	.	COPB1	COPB1	1	NP_004757.1 (98.5% identity in aln 100.0% length of target)	XP_012024600.1 (Ovis aries musimon: 99.9% identity in aln 100.0% length of target) | XP_005904418.1 (Bos mutus: 99.5% identity in aln 100.0% length of target) | NP_776706.2 (Bos taurus: 99.6% identity in aln 100.0% length of target) | XP_006070030.1 (Bubalus bubalis: 99.4% identity in aln 100.0% length of target) | XP_010856511.1 (Bison bison bison: 99.4% identity in aln 100.0% length of target) …	67	11	16.4	51	7	89.6	coatomer subunit beta'	Coatomer subunit beta' | coatomer subunit beta' isoform 1 | coatomer subunit beta' isoform 2 | beta prime cop	.	.	.	.	.
ENSOARG00000007098	ENSOARP00000007609	1	.	OR52D1	OR52D1	1	.	XP_012027807.1 (Ovis aries musimon: 99.7% identity in aln 100.0% length of target) | XP_005701536.1 (Capra hircus: 99.1% identity in aln 100.0% length of target) | XP_005896329.1 (Bos mutus: 95.3% identity in aln 100.0% length of target) | XP_006053638.1 (Bubalus bubalis: 94.3% identity in aln 100.0% length of target) | XP_010842608.1 (Bison bison bison: 95.9% identity in aln 100.0% length of tar…	14	6	42.9	12	6	100	olfactory receptor 52D1	.	0	0	.	.	ENSOARG00000010893/PTPMT1
ENSOARG00000007111	ENSOARP00000007625	0	.	KBTBD4	kelch repeat and BTB domain containing 4	1	.	XP_011972121.1 (Ovis aries musimon: 99.4% identity in aln 100.0% length of target) | XP_005690229.1 (Capra hircus: 99.8% identity in aln 100.0% length of target) | XP_005899021.1 (Bos mutus: 98.9% identity in aln 100.0% length of target) | NP_001069931.1 (Bos taurus: 99.3% identity in aln 100.0% length of target) | XP_006057449.1 (Bubalus bubalis: 98.8% identity in aln 100.0% length of target) | …	74	14	18.9	71	8	89.2	kelch repeat and BTB domain-containing protein 4	Kelch repeat and BTB domain-containing protein 4 | kelch repeat and BTB domain-containing protein 4 isoform 2 | kelch repeat and BTB (POZ) domain containing 4 | KBTBD4 | kelch repeat and BTB domain-containing protein 4 isoform b | kelch repeat and BTB (POZ) domain containing 4 variant	.	.	.	.	.
ENSOARG00000007113	ENSOARP00000007623	1	.	OR52H1	OR52H1	1	.	XP_005960467.1 (Pantholops hodgsonii: 98.107% identity in aln 100.0% length of target)XP_012027809.1 (Ovis aries musimon: 98.1% identity in aln 100.0% length of target) | XP_005701535.1 (Capra hircus: 97.5% identity in aln 100.0% length of target) | XP_005960467.1 (Pantholops hodgsonii: 98.1% identity in aln 100.0% length of target)	3	3	100	2	3	100	olfactory receptor 52H1	.	0	0	ENSOARG00000007052/DUS3L	.	.
ENSOARG00000007123	ENSOARP00000007635	0	.	PRR22	proline rich 22	4	.	XP_011995029.1 (Ovis aries musimon: 100.000% identity in aln 15.1% length of target)	5	5	100	3	4	100	proline-rich protein 22	.	4	-3,+1	.	INTS4,AAMDC,RSF1,CLNS1A,AQP11	.
ENSOARG00000007125	ENSOARP00000007639	1	ENSOARG00000016474	CLNS1A	chloride nucleotide-sensitive channel 1A	1	.	XP_012019399.1 (Ovis aries musimon: 99.6% identity in aln 100.0% length of target) | XP_005699555.1 (Capra hircus: 99.2% identity in aln 100.0% length of target) | XP_005908125.1 (Bos mutus: 98.7% identity in aln 100.0% length of target) | NP_001069768.1 (Bos taurus: 98.3% identity in aln 100.0% length of target) | XP_006077445.1 (Bubalus bubalis: 97.9% identity in aln 100.0% length of target) | …	50	9	18	49	7	86	methylosome subunit pICln	chloride ion current inducer protein I(Cln) | Methylosome subunit pICln | methylosome subunit pICln-like | methylosome subunit pICln isoform a | chloride channel, nucleotide-sensitive, 1A	.	.	.	.	.
ENSOARG00000007131	ENSOARP00000007643	1	.	OR52H1	OR52H1	1	.	XP_012027810.1 (Ovis aries musimon: 99.4% identity in aln 100.0% length of target) | XP_005701539.1 (Capra hircus: 98.4% identity in aln 100.0% length of target) | XP_005896328.1 (Bos mutus: 94.2% identity in aln 100.0% length of target) | XP_006053639.1 (Bubalus bubalis: 95.8% identity in aln 100.0% length of target) | XP_010841088.1 (Bison bison bison: 94.2% identity in aln 100.0% length of tar…	10	7	70	6	7	100	olfactory receptor 52H1	.	.	.	.	.	.
ENSOARG00000007149	ENSOARP00000007662	1	.	OR52H1	OR52H1	1	.	XP_012025766.1 (Ovis aries musimon: 98.4% identity in aln 100.0% length of target) | XP_005689953.1 (Capra hircus: 97.5% identity in aln 100.0% length of target) | XP_005906949.1 (Bos mutus: 93.9% identity in aln 100.0% length of target) | XP_006061657.1 (Bubalus bubalis: 93.3% identity in aln 100.0% length of target) | XP_010858807.1 (Bison bison bison: 93.9% identity in aln 100.0% length of tar…	7	6	85.7	5	6	100	olfactory receptor 52H1	.	0	0	.	.	ENSOARG00000007193/ENSBTAG00000046216
ENSOARG00000007156	ENSOARP00000007673	0	.	SNX29	sorting nexin 29	4	.	.	29	9	31	20	6	86.2	sorting nexin-29	sorting nexin-29-like | Sorting nexin-29 | RUN domain-containing protein 2A	0	0	.	.	.
ENSOARG00000007158	ENSOARP00000007672	0	.	PITHD1	PITH domain containing 1	1	XP_011540106.1 (98.3% identity in aln 100.0% length of target)	XP_005905225.1 (Bos mutus: 100.0% identity in aln 100.0% length of target) | XP_006196823.1 (Vicugna pacos: 99.2% identity in aln 100.0% length of target)	68	6	8.8	77	5	94.1	PITH domain-containing protein 1	similar to HT014 (predicted), isoform CRA_c | HT014 | Acyl-protein thioesterase 2 | chromosome 1 open reading frame 128, isoform CRA_a	3	-3,0	ENSOARG00000006510/ENSBTAG00000046186	C14orf2,RD3L,TDRD9,ASPG	ENSOARG00000007166/KIF26A
ENSOARG00000007159	ENSOARP00000007674	0	.	ASPG	asparaginase	4	.	.	109	11	10.1	30	6	91.7	60 kDa lysophospholipase	60 kDa lysophospholipase-like | ASPG protein | lysophospholipase | Asparaginase homolog (S. cerevisiae) | mCG1678 | Kinesin-like protein KIF26A | hCG23215, isoform CRA_a	.	.	.	.	.
ENSOARG00000007171	ENSOARP00000007685	0	.	CYP2G1	CYP2G1	1	.	XP_005692616.1 (Capra hircus: 100.0% identity in aln 100.0% length of target) | XP_014332128.1 (Bos mutus: 99.2% identity in aln 100.0% length of target) | XP_010847637.1 (Bison bison bison: 98.9% identity in aln 100.0% length of target) | XP_006189886.1 (Camelus ferus: 96.6% identity in aln 100.0% length of target) | XP_006215057.1 (Vicugna pacos: 96.6% identity in aln 100.0% length of target)	47	7	14.9	41	7	83	cytochrome P450 2G1	cytochrome P450 2G1-like | Cytochrome P450 2G1	16	-13,+3	ENSOARG00000019072/ENSBTAG00000047907	USP20,FNBP1,GPR107,NCS1,HMCN2,ASS1,FUBP3,PRDM12,EXOSC2,ABL1,QRFP,FIBCD1,LAMC3,AIF1L,NUP214,FAM78A,PLPP7	.
ENSOARG00000007175	ENSOARP00000007686	0	.	AIF1L	allograft inflammatory factor 1 like	1	.	XP_014412446.1 (Camelus ferus: 97.5% identity in aln 98.3% length of target)	94	5	5.3	69	5	89.4	allograft inflammatory factor 1-like	Allograft inflammatory factor 1-like protein | Chain A, Crystal Structure Of Human Iba2, Orthorhombic Crystal Form | DKFZp761J191 | allograft inflammatory factor 1-like isoform 1 | allograft inflammatory factor 1-like isoform 3 | Allograft inflammatory factor 1-like	.	.	.	.	.
ENSOARG00000007180	ENSOARP00000007719	0	.	SRCAP	helicase SRCAP	8	.	.	0	0	0	0	0	0	.	.	0	0	ENSOARG00000007170/ASPG	.	.
ENSOARG00000007197	ENSOARP00000007710	0	.	KIF26A	kinesin family member 26A	8	.	.	0	0	0	0	0	0	.	.	0	0	.	.	ENSOARG00000007193/ENSBTAG00000046216
ENSOARG00000007215	ENSOARP00000007731	0	.	CPPED1	serine/threonine-protein phosphatase CPPED1	6	.	XP_011989725.1 (Ovis aries musimon: 98.182% identity in aln 82.1% length of target)	7	6	85.7	3	4	71.4	serine/threonine-protein phosphatase CPPED1	.	0	0	.	.	ENSOARG00000019109/ENSBTAG00000018182
ENSOARG00000007218	ENSOARP00000007736	1	.	OR51I2	OR51I2	1	.	XP_005689958.1 (Capra hircus: 98.7% identity in aln 100.0% length of target) | XP_005906935.1 (Bos mutus: 95.9% identity in aln 100.0% length of target) | XP_010858768.1 (Bison bison bison: 95.9% identity in aln 100.0% length of target) | XP_005982132.1 (Pantholops hodgsonii: 95.9% identity in aln 100.0% length of target)	5	4	80	4	4	100	olfactory receptor 51I2	.	0	0	.	.	.
ENSOARG00000007222	ENSOARP00000007737	0	.	KIF26A	kinesin family member 26A	4	.	.	23	1	4.3	14	1	87	kinesin-like protein KIF26A	KIF26A | KIF26A protein | Similar to DKFZP434N178 protein	0	0	ENSOARG00000019109/ENSBTAG00000027653	.	.
ENSOARG00000007235	ENSOARP00000007753	1	.	OR51I2	OR51I2	1	.	XP_012025760.1 (Ovis aries musimon: 99.4% identity in aln 100.0% length of target) | XP_013825119.1 (Capra hircus: 97.1% identity in aln 100.0% length of target) | XP_005906943.1 (Bos mutus: 95.8% identity in aln 100.0% length of target) | XP_006061652.1 (Bubalus bubalis: 96.1% identity in aln 97.1% length of target) | XP_006185689.1 (Camelus ferus: 92.9% identity in aln 98.4% length of target) |…	18	7	38.9	11	7	88.9	olfactory receptor 51I2	Olfactory receptor 51I2	0	0	ENSOARG00000007260/ENSBTAG00000046399	.	.
ENSOARG00000007253	ENSOARP00000007772	0	.	CPPED1	serine/threonine-protein phosphatase CPPED1	8	.	.	0	0	0	0	0	0	.	.	.	.	.	.	.
ENSOARG00000007287	ENSOARP00000007804	0	.	SHISA9	shisa family member 9	1	.	XP_012018183.1 (Ovis aries musimon: 100.0% identity in aln 100.0% length of target)	5	4	80	4	4	100	protein shisa-9	.	0	0	.	.	ENSOARG00000007292/ENSBTAG00000039088
ENSOARG00000007308	ENSOARP00000007832	1	.	OR51I1	OR51I1	1	.	XP_012027293.1 (Ovis aries musimon: 98.1% identity in aln 100.0% length of target) | XP_013825170.1 (Capra hircus: 97.0% identity in aln 100.0% length of target) | XP_005906060.1 (Bos mutus: 96.1% identity in aln 100.0% length of target) | XP_006061650.1 (Bubalus bubalis: 96.8% identity in aln 100.0% length of target) | XP_010841757.1 (Bison bison bison: 95.5% identity in aln 100.0% length of tar…	9	7	77.8	7	6	100	olfactory receptor 51I1	.	.	.	.	.	.
ENSOARG00000007319	ENSOARP00000007845	0	.	GDPD4	glycerophosphodiester phosphodiesterase domain-containing protein 4-like	8	.	.	0	0	0	0	0	0	.	.	0	0	.	.	.
ENSOARG00000007325	ENSOARP00000007851	1	ENSOARG00000007342	OR51M1	olfactory receptor family 51 subfamily M member 1	1	.	XP_012027284.1 (Ovis aries musimon: 99.4% identity in aln 100.0% length of target) | XP_005689867.1 (Capra hircus: 95.6% identity in aln 100.0% length of target) | XP_005906061.1 (Bos mutus: 94.4% identity in aln 100.0% length of target) | XP_002693322.1 (Bos taurus: 94.4% identity in aln 100.0% length of target) | XP_006061649.1 (Bubalus bubalis: 94.4% identity in aln 100.0% length of target) | …	14	13	92.9	6	7	100	olfactory receptor 51M1	.	8	0,+8	ENSOARG00000007396/OSBPL1A	IMPACT,HRH4,ZNF521,SS18,PSMA8,TAF4B,KCTD1,AQP4,CHST9	ENSOARG00000003873/ENSBTAG00000034032
ENSOARG00000007327	ENSOARP00000007856	1	ENSOARG00000020446	IMPACT	impact RWD domain protein	1	NP_060909.1 (95.6% identity in aln 100.0% length of target)	XP_006041889.1 (Bubalus bubalis: 98.8% identity in aln 100.0% length of target)	35	1	2.9	17	1	82.9	protein IMPACT	Imprinted and ancient gene protein-like protein | Impact homolog (mouse), isoform CRA_b | Impact | Impact homolog (mouse), isoform CRA_a | RecName: Full=Protein IMPACT; AltName: Full=Imprinted and ancient gene protein homolog	.	.	.	.	.
ENSOARG00000007328	ENSOARP00000007852	0	.	RPS14	ribosomal protein S14	1	NP_005608.1 (100.0% identity in aln 100.0% length of target)	XP_006039696.1 (Bubalus bubalis: 100.0% identity in aln 100.0% length of target)	42	1	2.4	176	1	90.5	40S ribosomal protein S14	Calcium/calmodulin-dependent protein kinase type II subunit alpha | ribosomal protein S14-2 | mCG8804 | HLA class II histocompatibility antigen gamma chain	0	0	.	.	.
ENSOARG00000007342	ENSOARP00000007870	1	ENSOARG00000007325	OR51M1	olfactory receptor family 51 subfamily M member 1	1	.	XP_012027284.1 (Ovis aries musimon: 91.6% identity in aln 100.0% length of target) | XP_005689867.1 (Capra hircus: 93.8% identity in aln 100.0% length of target) | XP_005906061.1 (Bos mutus: 90.6% identity in aln 100.0% length of target) | XP_002693322.1 (Bos taurus: 90.6% identity in aln 100.0% length of target) | XP_006061649.1 (Bubalus bubalis: 90.0% identity in aln 100.0% length of target) | …	13	13	100	6	7	100	olfactory receptor 51M1	.	0	0	.	.	ENSOARG00000007370/KIF26A
ENSOARG00000007347	ENSOARP00000007874	0	.	ASPG	asparaginase	8	.	.	0	0	0	0	0	0	.	.	.	.	.	.	.
ENSOARG00000007351	ENSOARP00000007880	0	.	KIAA0391	KIAA0391	1	.	XP_005695290.1 (Capra hircus: 99.5% identity in aln 100.0% length of target) | XP_010815458.1 (Bos taurus: 97.6% identity in aln 100.0% length of target) | XP_006043913.1 (Bubalus bubalis: 97.8% identity in aln 96.2% length of target) | XP_010833598.1 (Bison bison bison: 98.1% identity in aln 100.0% length of target) | XP_005965383.1 (Pantholops hodgsonii: 99.0% identity in aln 100.0% length of t…	8	6	75	7	6	100	mitochondrial ribonuclease P protein 3	.	.	.	.	.	.
ENSOARG00000007361	ENSOARP00000007893	0	.	GDPD4	glycerophosphodiester phosphodiesterase domain-containing protein 4-like	8	.	.	0	0	0	0	0	0	.	.	6	-4,+2	.	PKDCC,EML4,COX7A2L,KCNG3,MTA3,OXER1,HAAO	ENSOARG00000007191/ENSBTAG00000014836
ENSOARG00000007373	ENSOARP00000007911	0	.	MTA3	metastasis associated 1 family member 3	2	XP_005264515.1 (97.3% identity in aln 88.5% length of target)	XP_011970384.1 (Ovis aries musimon: 99.2% identity in aln 88.5% length of target) | XP_013823043.1 (Capra hircus: 98.9% identity in aln 84.4% length of target) | NP_001095434.1 (Bos taurus: 99.2% identity in aln 88.6% length of target) | XP_006056858.1 (Bubalus bubalis: 98.9% identity in aln 84.4% length of target) | XP_010840613.1 (Bison bison bison: 99.2% identity in aln 84.4% length of target)…	47	7	14.9	39	7	93.6	metastasis-associated protein MTA3	Metastasis-associated protein MTA3 | metastasis-associated protein MTA3 isoform a	.	.	.	.	.
ENSOARG00000007402	ENSOARP00000007933	1	ENSOARG00000007450	OR52A5	olfactory receptor family 52 subfamily A member 5	1	.	XP_014945681.1 (Ovis aries musimon: 99.1% identity in aln 99.4% length of target) | XP_005689967.1 (Capra hircus: 98.7% identity in aln 99.4% length of target) | XP_005910061.1 (Bos mutus: 96.8% identity in aln 99.1% length of target) | XP_002693339.1 (Bos taurus: 95.9% identity in aln 99.1% length of target) | XP_010831037.1 (Bison bison bison: 95.2% identity in aln 100.0% length of target) | XP…	9	8	88.9	4	5	88.9	olfactory receptor 52A5	Olfactory receptor 52A5	.	.	.	.	.
ENSOARG00000007404	ENSOARP00000007942	0	.	MROH7	maestro heat like repeat family member 7	1	.	XP_011993153.1 (Ovis aries musimon: 99.773% identity in aln 100.0% length of target)XP_011993153.1 (Ovis aries musimon: 99.8% identity in aln 100.0% length of target) | XP_005905717.1 (Bos mutus: 95.5% identity in aln 100.0% length of target) | NP_001071417.2 (Bos taurus: 94.9% identity in aln 100.0% length of target) | XP_010845423.1 (Bison bison bison: 95.1% identity in aln 100.0% length of tar…	4	4	100	2	3	100	maestro heat-like repeat-containing protein family member 7	.	.	.	.	.	.
ENSOARG00000007413	ENSOARP00000007951	0	.	GDPD4	glycerophosphodiester phosphodiesterase domain-containing protein 4-like	8	.	.	0	0	0	0	0	0	.	.	.	.	.	.	.
ENSOARG00000007414	ENSOARP00000007961	0	.	AKR1B1	aldo-keto reductase family 1 member B	1	.	XP_013818966.1 (Capra hircus: 99.1% identity in aln 100.0% length of target) | XP_005902962.1 (Bos mutus: 98.4% identity in aln 100.0% length of target) | NP_001012537.1 (Bos taurus: 98.4% identity in aln 100.0% length of target) | XP_006042389.1 (Bubalus bubalis: 97.8% identity in aln 100.0% length of target) | XP_010829953.1 (Bison bison bison: 98.7% identity in aln 100.0% length of target) | X…	21	10	47.6	12	7	76.2	aldose reductase	RecName: Full=Aldose reductase; Short=AR; AltName: Full=20-alpha-hydroxysteroid dehydrogenase; Short=20-alpha-HSD; AltName: Full=Aldehyde reductase | aldose reductase (EC 1.1.1.21) | Aldose reductase | aldose reductase-like | 20 alpha-hydroxysteroid dehydrogenase	.	.	.	.	.
ENSOARG00000007415	ENSOARP00000007950	0	.	OR52A1	olfactory receptor family 52 subfamily A member 1	6	.	XP_012019995.1 (Ovis aries musimon: 99.359% identity in aln 100.0% length of target)	7	7	100	4	4	57.1	olfactory receptor 52A1-like	.	.	.	.	.	.
ENSOARG00000007425	ENSOARP00000007967	0	.	SIRPA	signal regulatory protein alpha	6	.	XP_014948553.1 (Ovis aries musimon: 98.814% identity in aln 86.8% length of target)	5	4	80	3	4	60	tyrosine-protein phosphatase non-receptor type substrate 1	.	0	0	.	.	ENSOARG00000000050/ENSBTAG00000020673
ENSOARG00000007431	ENSOARP00000007971	1	.	OR51V1	OR51V1	1	.	XP_012019996.1 (Ovis aries musimon: 99.7% identity in aln 100.0% length of target) | XP_005902379.1 (Bos mutus: 96.5% identity in aln 100.0% length of target) | XP_006041545.1 (Bubalus bubalis: 94.4% identity in aln 94.1% length of target) | XP_010859832.1 (Bison bison bison: 96.5% identity in aln 100.0% length of target)	15	4	26.7	10	4	100	olfactory receptor 51V1	.	.	.	.	.	.
ENSOARG00000007446	ENSOARP00000007986	0	.	GSTO1	glutathione S-transferase omega 1	6	.	XP_011958282.1 (Ovis aries: 100.000% identity in aln 100.0% length of target)	7	7	100	5	6	71.4	glutathione S-transferase omega-1	.	.	.	.	.	.
ENSOARG00000007450	ENSOARP00000007991	1	ENSOARG00000007402	OR52A5	olfactory receptor family 52 subfamily A member 5	1	.	XP_012019962.1 (Ovis aries musimon: 98.1% identity in aln 100.0% length of target) | XP_005701272.1 (Capra hircus: 96.8% identity in aln 100.0% length of target) | XP_002693393.1 (Bos taurus: 95.9% identity in aln 100.0% length of target) | XP_010831179.1 (Bison bison bison: 95.6% identity in aln 100.0% length of target) | XP_005983998.1 (Pantholops hodgsonii: 97.5% identity in aln 100.0% length …	5	5	100	4	5	100	olfactory receptor 52A5	.	6	-4,+2	ENSOARG00000007191/ENSBTAG00000014836	HAAO,OXER1,MTA3,KCNG3,COX7A2L,EML4,PKDCC	.
ENSOARG00000007463	ENSOARP00000008008	1	ENSOARG00000017809	COX7A2L	cytochrome c oxidase subunit 7A2 like	1	.	XP_005902615.1 (Bos mutus: 94.7% identity in aln 100.0% length of target)	34	6	17.6	37	4	82.4	cytochrome c oxidase subunit 7A-related protein, mitochondrial	cytochrome c oxidase subunit 7A-related protein, mitochondrial-like | cytochrome c oxidase subunit 7A-related protein, mitochondrial precursor	0	0	ENSOARG00000007505/NRCAM	.	ENSOARG00000007442/LAMB1
ENSOARG00000007474	ENSOARP00000008020	0	.	LAMB4	laminin subunit beta 4	5	.	.	6	0	0	4	0	100	laminin subunit beta-4	.	.	.	.	.	.
ENSOARG00000007477	ENSOARP00000008021	0	.	ASC1	ASC1	4	.	.	6	6	100	4	5	100	guanine nucleotide-binding protein subunit beta-like protein 1	.	0	0	ENSOARG00000007466/HBG	.	ENSOARG00000000051/ENSBTAG00000020673
ENSOARG00000007479	ENSOARP00000008022	1	.	OR51V1	OR51V1	1	.	XP_012019998.1 (Ovis aries musimon: 99.7% identity in aln 99.7% length of target) | XP_005701273.2 (Capra hircus: 98.4% identity in aln 99.7% length of target) | XP_006040004.1 (Bubalus bubalis: 98.7% identity in aln 99.7% length of target) | XP_010826844.1 (Bison bison bison: 98.7% identity in aln 99.7% length of target) | XP_006183149.1 (Camelus ferus: 93.6% identity in aln 99.4% length of targ…	35	7	20	29	7	91.4	olfactory receptor 51V1	Olfactory receptor 51V1 | olfactory receptor Olr114 (predicted) | olfactory receptor 624 (predicted)	.	.	.	.	.
ENSOARG00000007499	ENSOARP00000008045	2	ENSOARG00000006278, ENSOARG00000006296	OR51A4	olfactory receptor family 51 subfamily A member 4	1	.	XP_012019999.1 (Ovis aries musimon: 99.367% identity in aln 99.7% length of target)XP_012019999.1 (Ovis aries musimon: 99.4% identity in aln 99.7% length of target) | XP_005701917.1 (Capra hircus: 98.1% identity in aln 99.7% length of target)	2	2	100	1	2	100	olfactory receptor 51A4	.	.	.	.	.	.
ENSOARG00000007504	ENSOARP00000008051	0	.	GSTO1	glutathione S-transferase omega 1	8	.	.	0	0	0	0	0	0	.	.	0	0	ENSOARG00000011096/ENSBTAG00000046481	.	.
ENSOARG00000007518	ENSOARP00000008063	0	.	CSAD	cysteine sulfinic acid decarboxylase	1	.	XP_012004624.1 (Ovis aries musimon: 94.6% identity in aln 94.5% length of target)	16	11	68.8	10	8	100	cysteine sulfinic acid decarboxylase	.	3	0,+3	ENSOARG00000007497/ENSBTAG00000009539	PKIA,ZC2HC1A,IL7,STMN2	.
ENSOARG00000007520	ENSOARP00000008069	1	ENSOARG00000014508	PKIA	protein kinase (cAMP-dependent, catalytic) inhibitor alpha	1	NP_006814.1 (97.4% identity in aln 100.0% length of target)	NP_001032709.1 (Bos taurus: 98.7% identity in aln 100.0% length of target) | XP_006071536.1 (Bubalus bubalis: 97.4% identity in aln 100.0% length of target)	47	4	8.5	78	4	95.7	cAMP-dependent protein kinase inhibitor alpha	protein kinase inhibitor | Chain D, Crystal Structure Of Xpo1p-pki-gsp1p-gtp Complex	.	.	.	.	.
ENSOARG00000007532	ENSOARP00000008080	1	.	OR51G2	OR51G2	1	.	XP_012019975.1 (Ovis aries musimon: 99.7% identity in aln 99.7% length of target) | XP_005689973.1 (Capra hircus: 99.4% identity in aln 100.0% length of target) | XP_005904617.1 (Bos mutus: 96.2% identity in aln 100.0% length of target) | XP_010827139.1 (Bison bison bison: 96.5% identity in aln 99.7% length of target) | XP_005984082.1 (Pantholops hodgsonii: 99.1% identity in aln 100.0% length of …	6	5	83.3	4	5	100	olfactory receptor 51G2	.	.	.	.	.	.
ENSOARG00000007534	ENSOARP00000008082	0	.	LACC1	laccase domain containing 1	1	.	XP_011997449.1 (Ovis aries musimon: 99.5% identity in aln 100.0% length of target) | XP_005687482.1 (Capra hircus: 98.8% identity in aln 100.0% length of target) | XP_005896191.1 (Bos mutus: 97.2% identity in aln 100.0% length of target) | XP_005213720.1 (Bos taurus: 96.5% identity in aln 100.0% length of target) | XP_006053466.1 (Bubalus bubalis: 96.9% identity in aln 100.0% length of target) | …	14	8	57.1	10	6	100	laccase domain-containing protein 1	.	.	.	.	.	.
ENSOARG00000007572	ENSOARP00000008119	0	.	BEX2	brain expressed X-linked 2	8	.	.	0	0	0	0	0	0	.	.	3	-3,0	ENSOARG00000007906/ENSBTAG00000034582	PSMB9,TAP1,PSMB8,TAP2	.
ENSOARG00000007573	ENSOARP00000008124	0	.	TAP2	antigen peptide transporter 2	6	.	XP_011967524.1 (Ovis aries musimon: 99.722% identity in aln 100.0% length of target)	6	6	100	3	4	83.3	antigen peptide transporter 2	.	.	.	.	.	.
ENSOARG00000007583	ENSOARP00000008131	0	.	OR52A1	olfactory receptor family 52 subfamily A member 1	6	.	XP_012019971.1 (Ovis aries musimon: 99.679% identity in aln 91.2% length of target)	8	5	62.5	5	4	50	olfactory receptor 52A1	.	.	.	.	.	.
ENSOARG00000007595	ENSOARP00000008148	0	.	KCNE1	potassium voltage-gated channel subfamily E regulatory subunit 1	1	.	XP_005674714.1 (Capra hircus: 99.2% identity in aln 100.0% length of target) | NP_001071445.1 (Bos taurus: 98.5% identity in aln 100.0% length of target) | XP_005956965.1 (Pantholops hodgsonii: 99.2% identity in aln 100.0% length of target)	9	4	44.4	9	4	88.9	potassium voltage-gated channel subfamily E member 1	potassium voltage-gated channel subfamily E member 1-like	0	0	ENSOARG00000000238/ENSBTAG00000039467	.	.
ENSOARG00000007596	ENSOARP00000008149	0	.	OR52K1	olfactory receptor family 52 subfamily K member 1	6	.	XP_014945685.1 (Ovis aries musimon: 99.363% identity in aln 100.0% length of target)	17	6	35.3	12	6	64.7	olfactory receptor 52K1	.	2	0,+2	ENSOARG00000007628/ENSBTAG00000021235	TMEFF1,MURC,PLPPR1	ENSOARG00000007552/ENSBTAG00000025760
ENSOARG00000007598	ENSOARP00000008154	0	.	TMEFF1	transmembrane protein with EGF like and two follistatin like domains 1	1	.	XP_013821693.1 (Capra hircus: 99.8% identity in aln 100.0% length of target) | XP_005904138.1 (Bos mutus: 100.0% identity in aln 100.0% length of target) | XP_006185298.1 (Camelus ferus: 98.9% identity in aln 100.0% length of target) | XP_006204110.1 (Vicugna pacos: 99.1% identity in aln 100.0% length of target)	26	4	15.4	30	4	92.3	tomoregulin-1	myb/SANT-like DNA-binding domain-containing protein 3-like | MSANTD3-TMEFF1 fusion protein	.	.	.	.	.
ENSOARG00000007599	ENSOARP00000008152	1	ENSOARG00000003772	FSBP	fibrinogen silencer binding protein	1	NP_001243070.1 (97.7% identity in aln 100.0% length of target)	XP_014964472.1 (Ovis aries musimon: 99.0% identity in aln 100.0% length of target) | XP_005689294.1 (Capra hircus: 100.0% identity in aln 100.0% length of target) | XP_005895594.1 (Bos mutus: 99.0% identity in aln 100.0% length of target) | XP_006076341.1 (Bubalus bubalis: 99.3% identity in aln 100.0% length of target) | XP_010831807.1 (Bison bison bison: 99.3% identity in aln 100.0% length of ta…	47	6	12.8	54	6	93.6	fibrinogen silencer-binding protein	DNA repair and recombination protein RAD54B | DNA repair and recombination protein RAD54B-like	.	.	.	.	.
ENSOARG00000007613	ENSOARP00000008164	0	.	OR52A1	olfactory receptor family 52 subfamily A member 1	1	.	XP_012019968.1 (Ovis aries musimon: 98.7% identity in aln 98.7% length of target) | XP_005689980.1 (Capra hircus: 99.0% identity in aln 100.0% length of target) | XP_010830204.1 (Bison bison bison: 94.6% identity in aln 99.7% length of target) | XP_005984087.1 (Pantholops hodgsonii: 98.4% identity in aln 100.0% length of target)	5	5	100	4	5	80	olfactory receptor 52A1	olfactory receptor 52A1-like	1	0,+1	ENSOARG00000007617/ENSBTAG00000010156	SLC25A30,COG3	.
ENSOARG00000007620	ENSOARP00000008175	0	.	SLC25A30	solute carrier family 25 member 30	1	.	XP_012017583.1 (Ovis aries musimon: 100.0% identity in aln 100.0% length of target) | XP_005687489.1 (Capra hircus: 99.7% identity in aln 100.0% length of target) | XP_005896811.1 (Bos mutus: 99.7% identity in aln 100.0% length of target) | NP_001092365.1 (Bos taurus: 99.3% identity in aln 100.0% length of target) | XP_006187416.1 (Camelus ferus: 97.9% identity in aln 100.0% length of target) | X…	97	8	8.2	77	7	83.5	kidney mitochondrial carrier protein 1	kidney mitochondrial carrier protein 1-like | Kidney mitochondrial carrier protein 1 | kidney mitochondrial carrier protein 1 isoform 1 | RecName: Full=Kidney mitochondrial carrier protein 1; AltName: Full=Solute carrier family 25 member 30	0	0	ENSOARG00000007624/ENSBTAG00000039185	.	ENSOARG00000007669/ENSBTAG00000039467
ENSOARG00000007642	ENSOARP00000008197	1	.	OR52K2	OR52K2	1	.	XP_012019966.1 (Ovis aries musimon: 99.4% identity in aln 95.7% length of target) | XP_005689982.1 (Capra hircus: 99.7% identity in aln 95.7% length of target) | XP_015326225.1 (Bos taurus: 97.5% identity in aln 98.4% length of target) | XP_010832690.1 (Bison bison bison: 98.1% identity in aln 95.7% length of target)	16	6	37.5	12	6	81.2	olfactory receptor 52K2	olfactory receptor 52D1	.	.	.	.	.
ENSOARG00000007652	ENSOARP00000008211	1	.	TMPRSS11E	TMPRSS11E	1	.	XP_005681717.1 (Capra hircus: 98.6% identity in aln 100.0% length of target) | XP_005892947.1 (Bos mutus: 96.1% identity in aln 100.0% length of target) | XP_015327147.1 (Bos taurus: 95.6% identity in aln 100.0% length of target) | XP_006079901.1 (Bubalus bubalis: 94.0% identity in aln 100.0% length of target) | XP_010847208.1 (Bison bison bison: 95.8% identity in aln 100.0% length of target)	5	5	100	4	4	100	transmembrane protease serine 11E	.	0	0	ENSOARG00000006171/ENSBTAG00000037505	.	ENSOARG00000007669/OR52E5
ENSOARG00000007653	ENSOARP00000008208	1	ENSOARG00000006158	OR52E4	olfactory receptor family 52 subfamily E member 4	1	.	XP_012019965.1 (Ovis aries musimon: 98.1% identity in aln 100.0% length of target) | XP_005902625.1 (Bos mutus: 95.5% identity in aln 100.0% length of target) | XP_002687004.1 (Bos taurus: 97.1% identity in aln 100.0% length of target) | XP_006053470.1 (Bubalus bubalis: 97.1% identity in aln 100.0% length of target) | XP_005984090.1 (Pantholops hodgsonii: 97.1% identity in aln 98.1% length of tar…	17	8	47.1	10	4	82.4	olfactory receptor 52E4	olfactory receptor Olr87 (predicted) | olfactory receptor 604 | olfactory receptor 604 (predicted)	0	0	ENSOARG00000016318/ENSBTAG00000026034	.	ENSOARG00000007758/ENSBTAG00000019422
ENSOARG00000007679	ENSOARP00000008237	1	ENSOARG00000007758	SLC8A1	solute carrier family 8 member A1	1	XP_016860253.1 (97.5% identity in aln 96.6% length of target)	.	471	40	8.5	66	7	89.8	sodium/calcium exchanger 1	sodium/calcium exchanger 1-like | sodium/calcium exchanger 1 precursor | Sodium/calcium exchanger 1 | sodium/calcium exchanger 1 isoform B precursor | sodium/calcium exchanger 1 isoform C precursor | sodium/calcium exchanger 1 isoform A precursor | Na/Ca exchanger | sodium/calcium exchanger 1 isoform 2 | sodium-calcium exchanger | sodium-calcium exchanger circular exon 2 transcript | sodium/calci…	.	.	.	.	.
ENSOARG00000007691	ENSOARP00000008252	0	.	RAD54B	RAD54 homolog B (S. cerevisiae)	2	.	XP_010831804.1 (Bison bison bison: 97.308% identity in aln 86.2% length of target)XP_010831804.1 (Bison bison bison: 97.3% identity in aln 86.2% length of target)	1	1	100	1	1	100	DNA repair and recombination protein RAD54B	.	8	-6,+2	.	ZDHHC24,ACTN3,CTSF,CCDC87,CCS,RBM14,RBM4,RBM4B,SPTBN2	ENSOARG00000008338/ENSBTAG00000019689
ENSOARG00000007700	ENSOARP00000008259	0	.	RBM4	RNA-binding protein 4	8	.	.	0	0	0	0	0	0	.	.	.	.	.	.	.
ENSOARG00000007706	ENSOARP00000008266	0	.	RNF146	E3 ubiquitin-protein ligase RNF146	6	.	XP_012026057.1 (Ovis aries musimon: 99.432% identity in aln 100.0% length of target)	2	2	100	1	2	50	E3 ubiquitin-protein ligase RNF146	.	.	.	.	.	.
ENSOARG00000007811	ENSOARP00000008380	0	.	PHF11	PHD finger protein 11	8	.	.	0	0	0	0	0	0	.	.	7	-6,+1	.	TCEA2,RGS19,LKAAEAR1,OPRL1,NPBWR2,MYT1,PCMTD2,GINS1	ENSOARG00000007639/ENSBTAG00000027221
ENSOARG00000007835	ENSOARP00000008410	0	.	PCMTD2	protein-L-isoaspartate (D-aspartate) O-methyltransferase domain containing 2	1	.	XP_005908615.1 (Bos mutus: 97.8% identity in aln 100.0% length of target) | NP_001019650.1 (Bos taurus: 98.1% identity in aln 100.0% length of target) | XP_006045497.1 (Bubalus bubalis: 98.1% identity in aln 100.0% length of target) | XP_006175659.1 (Camelus ferus: 93.6% identity in aln 100.0% length of target) | XP_006209707.1 (Vicugna pacos: 93.9% identity in aln 100.0% length of target) | XP_0…	51	10	19.6	42	7	88.2	protein-L-isoaspartate O-methyltransferase domain-containing protein 2	Protein-L-isoaspartate O-methyltransferase domain-containing protein 2 | protein-L-isoaspartate O-methyltransferase domain-containing protein 2-like isoform 1 | protein-L-isoaspartate O-methyltransferase domain-containing protein 2 isoform 1 | protein-L-isoaspartate O-methyltransferase domain-containing protein 2-like isoform 2 | myelin transcription factor 1	.	.	.	.	.
ENSOARG00000007848	ENSOARP00000008420	0	.	MSI2	musashi RNA binding protein 2	5	.	.	8	0	0	7	0	87.5	RNA-binding protein Musashi homolog 2	RNA-binding protein Musashi like protein 2	.	.	.	.	.
ENSOARG00000007860	ENSOARP00000008436	0	.	ATP5L	ATP synthase, H+ transporting, mitochondrial Fo complex subunit G	8	.	.	0	0	0	0	0	0	.	.	.	.	.	.	.
ENSOARG00000007869	ENSOARP00000008445	0	.	UPF3B	regulator of nonsense transcripts 3B	8	.	.	0	0	0	0	0	0	.	.	.	.	.	.	.
ENSOARG00000007887	ENSOARP00000008462	0	.	SYNPO2L	synaptopodin 2 like	4	.	XP_011974398.1 (Ovis aries musimon: 98.639% identity in aln 45.1% length of target)	2	2	100	1	2	100	synaptopodin 2-like protein	.	1	0,+1	ENSOARG00000007297/ZBTB42	CEP170B,PLD4	.
ENSOARG00000007893	ENSOARP00000008470	0	.	CEP170B	centrosomal protein 170B	4	.	.	21	11	52.4	4	4	100	centrosomal protein of 170 kDa protein B	.	0	0	ENSOARG00000007927/ENSBTAG00000006446	.	ENSOARG00000007899/LPL
ENSOARG00000007913	ENSOARP00000008488	0	.	SPATA31E1	spermatogenesis-associated protein 31E1-like	6	.	XP_012017846.1 (Ovis aries musimon: 99.259% identity in aln 100.0% length of target)	4	4	100	3	4	75	spermatogenesis-associated protein 31E1-like	.	.	.	.	.	.
ENSOARG00000007919	ENSOARP00000008502	0	.	NELL1	neural EGFL like 1	1	.	XP_011999203.1 (Ovis aries musimon: 99.8% identity in aln 94.3% length of target)	132	8	6.1	64	6	83.3	protein kinase C-binding protein NELL1	protein kinase C-binding protein NELL1-like | Protein kinase C-binding protein NELL1 | NELL1 protein | protein kinase C-binding protein NELL1 precursor | protein kinase C-binding protein NELL1 isoform 2 precursor | protein kinase C-binding protein NELL1 isoform 1 precursor | NEL-like 1 (chicken), isoform CRA_a | protein kinase C-binding protein NELL1 isoform 3 precursor | nel-related protein | NE…	4	-2,+2	.	NEMP1,MYO1A,TAC3,ZBTB39,GPR182	ENSOARG00000008028/ENSBTAG00000001392
ENSOARG00000007920	ENSOARP00000008500	1	ENSOARG00000010440	TAC3	tachykinin 3	1	.	NP_001274501.1 (Capra hircus: 98.4% identity in aln 100.0% length of target) | XP_005901771.1 (Bos mutus: 96.8% identity in aln 100.0% length of target) | NP_851360.1 (Bos taurus: 96.0% identity in aln 100.0% length of target) | XP_006077909.1 (Bubalus bubalis: 96.0% identity in aln 100.0% length of target) | XP_005970664.1 (Pantholops hodgsonii: 99.2% identity in aln 100.0% length of target)	7	6	85.7	6	5	100	tachykinin-3	.	0	0	.	.	.
ENSOARG00000007956	ENSOARP00000008539	1	.	TRIM54	TRIM54	1	.	XP_011971206.1 (Ovis aries: 100.000% identity in aln 100.0% length of target)XP_013821538.1 (Capra hircus: 99.2% identity in aln 100.0% length of target) | XP_014335632.1 (Bos mutus: 96.3% identity in aln 100.0% length of target) | XP_005957419.1 (Pantholops hodgsonii: 98.7% identity in aln 100.0% length of target)	4	4	100	3	4	100	tripartite motif-containing protein 54-like	.	.	.	.	.	.
ENSOARG00000007961	ENSOARP00000008544	0	.	AKAP17A	A-kinase anchoring protein 17A	1	.	XP_014333890.1 (Bos mutus: 99.3% identity in aln 98.4% length of target)	139	4	2.9	112	4	87.8	A-kinase anchor protein 17A	A-kinase anchor protein 17A-like | Protein XE7 | A-kinase anchor protein 17A isoform 1 | SFRS17A protein | 385 aa isoform | 550 amino acids MW=61kDa, glycosylated=75 kDa; expressed on endothelium, activated lymphocytes and syncytiotrophoblast, contains leucine zipper and basic region homologous to myc; 721P | 695 aa isoform | Hydroxyindole O-methyltransferase | A-kinase anchor protein 17A isoform…	.	.	.	.	.
ENSOARG00000007962	ENSOARP00000008543	0	.	CXorf40A	chromosome X open reading frame 40A	1	.	XP_006055589.1 (Bubalus bubalis: 97.5% identity in aln 95.2% length of target) | XP_005972103.1 (Pantholops hodgsonii: 98.1% identity in aln 95.2% length of target)	5	5	100	4	5	80	protein CXorf40A-like	protein CXorf40A	.	.	.	.	.
ENSOARG00000008022	ENSOARP00000008614	0	.	SORBS2	sorbin and SH3 domain containing 2	1	.	XP_011982738.1 (Ovis aries musimon: 99.8% identity in aln 93.9% length of target) | XP_005698793.1 (Capra hircus: 98.7% identity in aln 94.9% length of target) | XP_005909363.1 (Bos mutus: 98.3% identity in aln 93.9% length of target) | XP_010834102.1 (Bison bison bison: 98.5% identity in aln 93.9% length of target) | XP_006178427.1 (Camelus ferus: 95.9% identity in aln 93.9% length of target) | …	37	11	29.7	22	8	94.6	sorbin and SH3 domain-containing protein 2	sorbin and SH3 domain-containing protein 2-like	0	0	ENSOARG00000008080/AKR1A1	.	.
ENSOARG00000008023	ENSOARP00000008613	0	.	NASP	nuclear autoantigenic sperm protein	4	.	.	5	4	80	4	4	100	nuclear autoantigenic sperm protein	.	1	0,+1	ENSOARG00000007975/ENSBTAG00000014869	CBFA2T2,C20orf144	ENSOARG00000008520/ACTL10
ENSOARG00000008032	ENSOARP00000008622	0	.	CBFA2T2	CBFA2/RUNX1 translocation partner 2	1	XP_011527403.1 (96.9% identity in aln 95.4% length of target)	XP_011970349.1 (Ovis aries musimon: 98.8% identity in aln 99.5% length of target) | XP_013824391.1 (Capra hircus: 99.8% identity in aln 100.0% length of target) | XP_005896985.1 (Bos mutus: 98.5% identity in aln 93.8% length of target) | XP_006075809.1 (Bubalus bubalis: 99.7% identity in aln 100.0% length of target) | XP_006179320.1 (Camelus ferus: 97.1% identity in aln 93.8% length of target) | …	80	8	10	57	7	88.8	protein CBFA2T2	Protein CBFA2T2 | core-binding factor, runt domain, alpha subunit 2, translocated to, 2 homolog (human), isoform CRA_c | protein CBFA2T2 isoform MTGR1b | protein CBFA2T2 isoform 3 | protein CBFA2T2 isoform MTGR1a | core-binding factor, runt domain, alpha subunit 2; translocated to, 2 (predicted), isoform CRA_a | protein CBFA2T2 isoform MTGR1c | MTG8 related protein	0	0	.	.	ENSOARG00000008045/ENSBTAG00000035373
ENSOARG00000008040	ENSOARP00000008628	0	.	CTF1	cardiotrophin 1	4	.	.	6	2	33.3	4	2	100	cardiotrophin-1	.	.	.	.	.	.
ENSOARG00000008052	ENSOARP00000008644	0	.	GSK3A	glycogen synthase kinase 3 alpha	1	.	XP_012017922.1 (Ovis aries musimon: 100.0% identity in aln 93.4% length of target) | XP_013826802.1 (Capra hircus: 100.0% identity in aln 100.0% length of target) | NP_001095662.1 (Bos taurus: 99.3% identity in aln 90.3% length of target)	24	3	12.5	22	3	95.8	glycogen synthase kinase-3 alpha	glycogen synthase kinase 3 alpha	.	.	.	.	.
ENSOARG00000008072	ENSOARP00000008663	0	.	TRDN	triadin	1	.	XP_005967312.1 (Pantholops hodgsonii: 96.6% identity in aln 94.0% length of target)	30	29	96.7	5	6	96.7	triadin	Triadin	0	0	ENSOARG00000007439/AWAT2	.	ENSOARG00000007341/EDA
ENSOARG00000008109	ENSOARP00000008697	6	ENSOARG00000003480, ENSOARG00000005024, ENSOARG00000005934, ENSOARG00000014076, ENSOARG00000014324, ENSOARG00000019540	RPL23A	ribosomal protein L23a	1	NP_000975.2 (100.0% identity in aln 100.0% length of target)	XP_014964041.1 (Ovis aries musimon: 96.2% identity in aln 98.7% length of target) | XP_005675880.1 (Capra hircus: 100.0% identity in aln 98.7% length of target) | XP_014337154.1 (Bos mutus: 99.4% identity in aln 100.0% length of target) | XP_006042239.1 (Bubalus bubalis: 97.4% identity in aln 91.8% length of target) | XP_006185001.1 (Camelus ferus: 96.8% identity in aln 100.0% length of target)	105	13	12.4	96	6	75.2	60S ribosomal protein L23a	60S ribosomal protein L23a-like | Rpl23a protein | mCG1034428 | hCG2001000 | ribosomal protein L23a (predicted) | COX assembly mitochondrial protein homolog | homology to rat ribosomal protein L23 | hCG16001, isoform CRA_a | ribosomal protein L23a Y-linked protein | hCG16001, isoform CRA_b | ribosomal protein L23a, isoform CRA_a | 60S ribosomal protein L23a-like isoform 1	1	0,+1	ENSOARG00000005649/ENSBTAG00000046997	MOCS2,ITGA2	ENSOARG00000008302/ENSBTAG00000046575
ENSOARG00000008150	ENSOARP00000008741	0	.	MOCS2	molybdenum cofactor synthesis 2	1	.	XP_005887426.1 (Bos mutus: 97.7% identity in aln 100.0% length of target) | XP_010844454.1 (Bison bison bison: 93.2% identity in aln 100.0% length of target)	8	3	37.5	8	3	87.5	molybdopterin synthase sulfur carrier subunit	molybdopterin synthase sulfur carrier subunit-like	.	.	.	.	.
ENSOARG00000008157	ENSOARP00000008749	0	.	CABLES1	Cdk5 and Abl enzyme substrate 1	2	.	XP_002697772.3 (Bos taurus: 100.0% identity in aln 79.1% length of target) | XP_006079279.1 (Bubalus bubalis: 100.0% identity in aln 77.7% length of target) | XP_006188828.1 (Camelus ferus: 97.2% identity in aln 85.8% length of target) | XP_006205173.2 (Vicugna pacos: 97.2% identity in aln 78.5% length of target) | XP_005976791.1 (Pantholops hodgsonii: 100.0% identity in aln 88.9% length of targe…	75	6	8	58	6	90.7	CDK5 and ABL1 enzyme substrate 1	CDK5 and ABL1 enzyme substrate 1 isoform 1 | CDK5 and ABL1 enzyme substrate 1 isoform 2 | Interactor with CDK3 1 | CDK5 and ABL1 enzyme substrate 1-like protein | CABLES	0	0	.	.	.
ENSOARG00000008168	ENSOARP00000008757	2	ENSOARG00000002764, ENSOARG00000010413	RPS25	ribosomal protein S25	1	NP_001019.1 (98.4% identity in aln 100.0% length of target)	.	56	5	8.9	109	3	80.4	40S ribosomal protein S25	40S ribosomal protein S25-like | ribosomal protein S25 (predicted) | mCG1027072 | mCG10725, isoform CRA_b	0	0	.	.	.
ENSOARG00000008182	ENSOARP00000008775	2	ENSOARG00000011013, ENSOARG00000020142	MED4	mediator complex subunit 4	1	.	XP_005908205.1 (Bos mutus: 97.8% identity in aln 100.0% length of target) | NP_001029658.1 (Bos taurus: 98.1% identity in aln 100.0% length of target) | XP_006060896.1 (Bubalus bubalis: 98.1% identity in aln 100.0% length of target) | XP_010832347.1 (Bison bison bison: 97.8% identity in aln 100.0% length of target) | XP_006218697.1 (Vicugna pacos: 97.4% identity in aln 100.0% length of target) | …	71	6	8.5	68	5	84.5	mediator of RNA polymerase II transcription subunit 4	Mediator complex subunit 4 | VDRIP | mediator of RNA polymerase II transcription, subunit 4 homolog | mediator of RNA polymerase II transcription, subunit 4 homolog (yeast) | Mediator of RNA polymerase II transcription subunit 4 | mediator of RNA polymerase II transcription subunit 4 isoform 1 | p36 TRAP/SMCC/PC2 subunit | mediator complex subunit 4	0	0	ENSOARG00000008155/ENSBTAG00000005734	.	ENSOARG00000008272/ENSBTAG00000008705
ENSOARG00000008201	ENSOARP00000008796	0	.	RBBP8	RB binding protein 8, endonuclease	8	.	.	0	0	0	0	0	0	.	.	7	-5,+2	ENSOARG00000007639/ENSBTAG00000027221	GINS1,PCMTD2,MYT1,NPBWR2,OPRL1,LKAAEAR1,RGS19,TCEA2	.
ENSOARG00000008219	ENSOARP00000008816	0	.	LKAAEAR1	LKAAEAR motif containing 1	4	.	.	17	1	5.9	16	1	100	protein LKAAEAR1	.	0	0	.	.	.
ENSOARG00000008223	ENSOARP00000008833	0	.	RBBP8	RB binding protein 8, endonuclease	1	.	XP_012006789.1 (Ovis aries musimon: 99.775% identity in aln 100.0% length of target)XP_012006789.1 (Ovis aries musimon: 99.8% identity in aln 100.0% length of target)	1	1	100	0	1	100	DNA endonuclease RBBP8	.	.	.	.	.	.
ENSOARG00000008225	ENSOARP00000008822	0	.	SLC25A51	solute carrier family 25 member 51	1	NP_219480.1 (93.3% identity in aln 100.0% length of target)	NP_001092864.1 (Bos taurus: 99.3% identity in aln 100.0% length of target) | XP_006187847.1 (Camelus ferus: 96.6% identity in aln 100.0% length of target)	64	4	6.2	62	4	78.1	solute carrier family 25 member 51	solute carrier family 25 member 52 | solute carrier family 25 member 51-like | Mitochondrial carrier triple repeat protein 1 | RecName: Full=Solute carrier family 25 member 52; AltName: Full=Mitochondrial carrier triple repeat protein 2 | Mitochondrial carrier triple repeat 2	0	0	ENSOARG00000016531/ZNRF4	.	ENSOARG00000008180/KDM4B
ENSOARG00000008257	ENSOARP00000008851	0	.	PTPRS	protein tyrosine phosphatase, receptor type S	4	.	.	91	16	17.6	24	4	85.7	receptor-type tyrosine-protein phosphatase S	receptor-type tyrosine-protein phosphatase S-like | PTPsigma [AA 524- 1926] | Receptor-type tyrosine-protein phosphatase S | protein tyrosine phosphatase, receptor type, S, isoform CRA_a | protein tyrosine phosphatase, receptor type, S, isoform CRA_c | protein tyrosine phosphatase sigma | receptor-type tyrosine-protein phosphatase S isoform 1 precursor	2	-1,+1	.	CENPN,ATMIN,C16orf46	.
ENSOARG00000008261	ENSOARP00000008855	0	.	ATMIN	ATM interactor	2	.	XP_005907941.1 (Bos mutus: 97.4% identity in aln 84.7% length of target) | XP_006184009.1 (Camelus ferus: 91.1% identity in aln 75.4% length of target)	13	9	69.2	8	7	100	ATM interactor	.	1	-1,0	.	ORC5,LHFPL3	.
ENSOARG00000008266	ENSOARP00000008860	0	.	LHFPL3	lipoma HMGIC fusion partner-like 3	8	.	.	0	0	0	0	0	0	.	.	.	.	.	.	.
ENSOARG00000008276	ENSOARP00000008875	0	.	NACA	nascent polypeptide-associated complex subunit alpha	8	.	.	0	0	0	0	0	0	.	.	1	0,+1	.	LHFPL3,KMT2E	ENSOARG00000008292/ENSBTAG00000047286
ENSOARG00000008278	ENSOARP00000008874	0	.	LHFPL3	lipoma HMGIC fusion partner-like 3	4	.	.	128	5	3.9	112	3	89.8	lipoma HMGIC fusion partner-like 3 protein	lipoma HMGIC fusion partner-like 3 protein-like | Lipoma HMGIC fusion partner-like 3 protein | hCG2039935 | lipoma HMGIC fusion partner-like 3 protein isoform 2 | Lipoma HMGIC fusion partner-like 3 | hCG1811408 | mCG144535 | lipoma HMGIC fusion partner-like 3 protein isoform 1 | RecName: Full=Lipoma HMGIC fusion partner-like 3 protein	.	.	.	.	.
ENSOARG00000008307	ENSOARP00000008909	0	.	CCDC71L	coiled-coil domain containing 71-like	3	.	XP_006068506.1 (Bubalus bubalis: 94.4% identity in aln 74.2% length of target)	29	3	10.3	26	3	93.1	coiled-coil domain-containing protein 71L	coiled-coil domain-containing protein 71L-like	0	0	.	.	.
ENSOARG00000008325	ENSOARP00000008926	1	.	GPR141	GPR141	1	.	XP_012005700.1 (Ovis aries musimon: 99.7% identity in aln 100.0% length of target) | XP_013818681.1 (Capra hircus: 98.6% identity in aln 100.0% length of target) | XP_005886739.1 (Bos mutus: 94.2% identity in aln 100.0% length of target) | XP_006046470.1 (Bubalus bubalis: 95.2% identity in aln 100.0% length of target) | XP_010839793.1 (Bison bison bison: 94.5% identity in aln 100.0% length of tar…	7	6	85.7	5	6	100	probable G-protein coupled receptor 141	.	.	.	.	.	.
ENSOARG00000008339	ENSOARP00000008941	1	ENSOARG00000014618	ARPC1A	actin related protein 2/3 complex subunit 1A	1	.	XP_005697938.2 (Capra hircus: 99.5% identity in aln 94.5% length of target) | NP_001068827.1 (Bos taurus: 99.7% identity in aln 100.0% length of target) | XP_006172724.1 (Camelus ferus: 99.2% identity in aln 100.0% length of target) | XP_006210427.1 (Vicugna pacos: 98.9% identity in aln 100.0% length of target)	95	5	5.3	141	5	86.3	actin-related protein 2/3 complex subunit 1A	Actin-related protein 2/3 complex subunit 1A | actin related protein 2/3 complex subunit 1A variant | actin related protein 2/3 complex subunit 1A S homeolog | actin-related protein 2/3 complex subunit 1A-like | actin related protein 2/3 complex, subunit 1A, 41kDa, isoform CRA_a | Sop2p-like protein | actin-related protein 2/3 complex subunit 1A isoform 1	.	.	.	.	.
ENSOARG00000008375	ENSOARP00000008993	0	.	PKD1L2	polycystin 1 like 2 (gene/pseudogene)	1	.	XP_012023779.1 (Ovis aries musimon: 99.716% identity in aln 100.0% length of target)XP_012023779.1 (Ovis aries musimon: 99.7% identity in aln 100.0% length of target) | XP_005691948.1 (Capra hircus: 98.0% identity in aln 100.0% length of target)	2	2	100	1	2	100	polycystic kidney disease protein 1-like 2	.	.	.	.	.	.
ENSOARG00000008422	ENSOARP00000009031	4	ENSOARG00000000494, ENSOARG00000009331, ENSOARG00000009350, ENSOARG00000017657	MAGEA10	MAGE family member A10	1	.	XP_005700565.2 (Capra hircus: 98.534% identity in aln 100.0% length of target)XP_005700565.2 (Capra hircus: 98.5% identity in aln 100.0% length of target)	1	1	100	1	1	100	melanoma-associated antigen 10-like	.	.	.	.	.	.
ENSOARG00000008437	ENSOARP00000009047	0	.	CACNB4	calcium voltage-gated channel auxiliary subunit beta 4	1	XP_011510098.1 (99.4% identity in aln 99.8% length of target)	XP_010800256.1 (Bos taurus: 99.8% identity in aln 99.6% length of target)	95	4	4.2	96	3	88.4	voltage-dependent L-type calcium channel subunit beta-4	Voltage-dependent L-type calcium channel subunit beta-4 | voltage-dependent L-type calcium channel subunit beta-4 isoform b | voltage-dependent L-type calcium channel subunit beta-4 isoform a | TPA inf: voltage-gated calcium channel beta 4 subunit transcript variant 1 | voltage-dependent L-type calcium channel subunit beta-4 isoform d | voltage-dependent L-type calcium channel subunit beta-4 isof…	2	0,+2	ENSOARG00000008441/ATP4B	GRK1,TMEM255B,GAS6	ENSOARG00000008646/ENSBTAG00000025192
ENSOARG00000008450	ENSOARP00000009065	0	.	GRK1	G protein-coupled receptor kinase 1	8	.	.	0	0	0	0	0	0	.	.	7	0,+7	.	CDK3,EVPL,SRP68,GALR2,ZACN,EXOC7,FOXJ1,RNF157	.
ENSOARG00000008454	ENSOARP00000009069	0	.	CDK3	cyclin-dependent kinase 3	8	.	.	0	0	0	0	0	0	.	.	0	0	ENSOARG00000009105/ZNF782	.	ENSOARG00000009058/AAED1
ENSOARG00000008467	ENSOARP00000009078	10	ENSOARG00000000975, ENSOARG00000001105, ENSOARG00000004460, ENSOARG00000004995, ENSOARG00000006035, ENSOARG00000006818, ENSOARG00000015615, ENSOARG00000018407, ENSOARG00000018456, ENSOARG00000019908	RPS15A	ribosomal protein S15a	1	.	XP_005956681.1 (Pantholops hodgsonii: 91.803% identity in aln 100.0% length of target)XP_005956681.1 (Pantholops hodgsonii: 91.8% identity in aln 100.0% length of target)	1	1	100	1	1	100	40S ribosomal protein S15A	.	.	.	.	.	.
ENSOARG00000008493	ENSOARP00000009108	2	ENSOARG00000011047, ENSOARG00000017773	OR4C46	olfactory receptor family 4 subfamily C member 46	1	.	XP_012025473.1 (Ovis aries musimon: 97.386% identity in aln 98.1% length of target)XP_012025473.1 (Ovis aries musimon: 97.4% identity in aln 98.1% length of target) | XP_005911615.2 (Bos mutus: 90.0% identity in aln 99.4% length of target) | XP_010857275.1 (Bison bison bison: 92.8% identity in aln 99.0% length of target)	4	3	75	2	3	100	olfactory receptor 4C46	.	2	-2,0	.	TEX101,CD177,CXCL17	ENSOARG00000008495/ENSBTAG00000006859
ENSOARG00000008501	ENSOARP00000009119	0	.	CXCL17	VEGF coregulated chemokine 1	6	.	XP_004015346.1 (Ovis aries: 100.000% identity in aln 44.9% length of target)	4	4	100	3	4	75	VEGF coregulated chemokine 1	.	.	.	.	.	.
ENSOARG00000008531	ENSOARP00000009150	0	.	PHF11	PHD finger protein 11	1	.	NP_001039609.1 (Bos taurus: 96.4% identity in aln 100.0% length of target) | XP_006063637.1 (Bubalus bubalis: 94.8% identity in aln 96.7% length of target) | XP_010834009.1 (Bison bison bison: 96.1% identity in aln 100.0% length of target) | XP_005979227.1 (Pantholops hodgsonii: 97.6% identity in aln 100.0% length of target)	4	4	100	4	4	100	PHD finger protein 11	.	1	0,+1	.	ERCC6L2,HSD17B3	.
ENSOARG00000008546	ENSOARP00000009168	0	.	ERCC6L2	DNA excision repair protein ERCC-6-like 2	6	.	XP_005684203.1 (Capra hircus: 98.882% identity in aln 80.4% length of target)	7	6	85.7	3	3	85.7	DNA excision repair protein ERCC-6-like 2	.	.	.	.	.	.
ENSOARG00000008562	ENSOARP00000009182	0	.	SERF1A	small EDRK-rich factor 1A	1	.	NP_001106772.1 (Bos taurus: 98.4% identity in aln 100.0% length of target) | XP_006185261.1 (Camelus ferus: 93.5% identity in aln 100.0% length of target) | XP_006197622.1 (Vicugna pacos: 93.5% identity in aln 100.0% length of target) | XP_005960086.1 (Pantholops hodgsonii: 98.4% identity in aln 100.0% length of target)	52	6	11.5	67	5	84.6	small EDRK-rich factor 1	Small EDRK-rich factor 1 | small EDRK-rich factor 1-like | small EDRK-rich factor 1 isoform 2	1	-1,0	ENSOARG00000013618/RANBP6	IL33,TPD52L3	.
ENSOARG00000008565	ENSOARP00000009188	0	.	TPD52L3	tumor protein D52 like 3	1	.	XP_005683737.1 (Capra hircus: 97.9% identity in aln 100.0% length of target) | XP_005906971.1 (Bos mutus: 93.8% identity in aln 100.0% length of target) | XP_006076512.1 (Bubalus bubalis: 91.4% identity in aln 100.0% length of target) | XP_010855276.1 (Bison bison bison: 93.4% identity in aln 100.0% length of target) | XP_005973391.1 (Pantholops hodgsonii: 97.1% identity in aln 100.0% length of t…	9	6	66.7	5	6	77.8	tumor protein D55	Tumor protein D55 | TPD52L3 protein	.	.	.	.	.
ENSOARG00000008566	ENSOARP00000009190	0	.	SETMAR	SET domain and mariner transposase fusion gene	1	.	XP_012003874.1 (Ovis aries musimon: 98.4% identity in aln 100.0% length of target) | XP_005695768.1 (Capra hircus: 99.3% identity in aln 100.0% length of target) | NP_001068976.1 (Bos taurus: 95.4% identity in aln 100.0% length of target) | XP_006074658.1 (Bubalus bubalis: 96.4% identity in aln 100.0% length of target) | XP_010842428.1 (Bison bison bison: 96.1% identity in aln 100.0% length of ta…	7	6	85.7	5	6	85.7	histone-lysine N-methyltransferase SETMAR	Histone-lysine N-methyltransferase SETMAR	0	0	ENSOARG00000013783/ENSBTAG00000046866	.	.
ENSOARG00000008591	ENSOARP00000009216	1	ENSOARG00000016599	ZNF623	zinc finger protein 623	1	.	XP_012024314.1 (Ovis aries musimon: 99.2% identity in aln 100.0% length of target) | XP_005688851.1 (Capra hircus: 99.2% identity in aln 100.0% length of target) | XP_014337337.1 (Bos mutus: 98.0% identity in aln 100.0% length of target) | XP_005215331.1 (Bos taurus: 98.0% identity in aln 100.0% length of target) | XP_006045234.1 (Bubalus bubalis: 97.4% identity in aln 100.0% length of target) | …	8	7	87.5	5	6	87.5	zinc finger protein 623	Zinc finger protein 623	0	0	.	.	.
ENSOARG00000008593	ENSOARP00000009218	0	.	AIMP1	aminoacyl tRNA synthetase complex interacting multifunctional protein 1	8	.	.	0	0	0	0	0	0	.	.	.	.	.	.	.
ENSOARG00000008621	ENSOARP00000009247	0	.	AOPEP	aminopeptidase O	8	.	.	0	0	0	0	0	0	.	.	.	.	.	.	.
ENSOARG00000008634	ENSOARP00000009262	0	.	AOPEP	aminopeptidase O	8	.	.	0	0	0	0	0	0	.	.	0	0	ENSOARG00000008747/TMEM82	.	.
ENSOARG00000008656	ENSOARP00000009287	0	.	FBLIM1	filamin binding LIM protein 1	1	.	XP_011997921.1 (Ovis aries musimon: 99.736% identity in aln 100.0% length of target)XP_011997921.1 (Ovis aries musimon: 99.7% identity in aln 100.0% length of target) | XP_005690863.1 (Capra hircus: 99.2% identity in aln 100.0% length of target) | XP_005966334.1 (Pantholops hodgsonii: 98.4% identity in aln 100.0% length of target)	3	3	100	2	3	100	filamin-binding LIM protein 1	.	.	.	.	.	.
ENSOARG00000008702	ENSOARP00000009341	1	ENSOARG00000008718	CYP2J2	cytochrome P450 family 2 subfamily J member 2	1	.	XP_012021011.1 (Ovis aries musimon: 99.004% identity in aln 100.0% length of target)XP_012021011.1 (Ovis aries musimon: 99.0% identity in aln 100.0% length of target) | XP_013818244.1 (Capra hircus: 97.6% identity in aln 100.0% length of target) | XP_010857578.1 (Bison bison bison: 92.0% identity in aln 96.8% length of target) | XP_005956792.1 (Pantholops hodgsonii: 95.3% identity in aln 96.8% le…	4	4	100	3	4	100	cytochrome P450 2J2-like	.	3	-3,0	.	GALNT18,USP47,DKK3,MICAL2	.
ENSOARG00000008705	ENSOARP00000009356	0	.	MICAL2	protein-methionine sulfoxide oxidase MICAL2	8	.	.	0	0	0	0	0	0	.	.	0	0	.	.	.
ENSOARG00000008711	ENSOARP00000009345	0	.	DTD1	D-tyrosyl-tRNA deacylase 1	1	.	XP_012015120.1 (Ovis aries musimon: 95.7% identity in aln 100.0% length of target) | XP_013824051.1 (Capra hircus: 95.2% identity in aln 100.0% length of target) | NP_001033193.1 (Bos taurus: 94.3% identity in aln 100.0% length of target) | XP_005957409.1 (Pantholops hodgsonii: 93.4% identity in aln 100.0% length of target)	52	9	17.3	49	8	92.3	D-tyrosyl-tRNA(Tyr) deacylase 1	D-tyrosyl-tRNA deacylase 1 homolog (S. cerevisiae) | D-tyrosyl-tRNA(Tyr) deacylase 1 isoform 2 | histidyl-tRNA synthetase	.	.	.	.	.
ENSOARG00000008716	ENSOARP00000009358	0	.	CPEB2	cytoplasmic polyadenylation element binding protein 2	1	.	XP_006194737.1 (Camelus ferus: 99.3% identity in aln 100.0% length of target) | XP_005985119.1 (Pantholops hodgsonii: 99.4% identity in aln 99.8% length of target)	46	4	8.7	49	4	87	cytoplasmic polyadenylation element-binding protein 2	cytoplasmic polyadenylation element-binding protein 2 isoform B | RecName: Full=Cytoplasmic polyadenylation element-binding protein 2; Short=CPE-BP2; Short=CPE-binding protein 2; Short=mCPEB-2 | cytoplasmic polyadenylation element binding protein 2, isoform CRA_a | RecName: Full=Cytoplasmic polyadenylation element-binding protein 2; Short=CPE-BP2; Short=CPE-binding protein 2; Short=hCPEB-2 | cyto…	.	.	.	.	.
ENSOARG00000008718	ENSOARP00000009357	1	ENSOARG00000008702	CYP2J2	cytochrome P450 family 2 subfamily J member 2	1	.	XP_014945833.1 (Ovis aries musimon: 100.0% identity in aln 100.0% length of target) | XP_005678398.1 (Capra hircus: 96.4% identity in aln 100.0% length of target) | XP_006048352.1 (Bubalus bubalis: 91.6% identity in aln 100.0% length of target) | XP_010857608.1 (Bison bison bison: 90.8% identity in aln 100.0% length of target) | XP_005956791.1 (Pantholops hodgsonii: 96.0% identity in aln 100.0% l…	6	6	100	5	6	83.3	cytochrome P450 2J2-like	cytochrome P450, family 2, subfamily J	0	0	ENSOARG00000014869/ENSBTAG00000004029	.	.
ENSOARG00000008725	ENSOARP00000009368	1	.	LCOR	LCOR	1	.	XP_005698337.1 (Capra hircus: 99.8% identity in aln 100.0% length of target) | XP_005898911.1 (Bos mutus: 100.0% identity in aln 100.0% length of target) | XP_006185173.1 (Camelus ferus: 99.8% identity in aln 100.0% length of target)	134	5	3.7	125	4	94	ligand-dependent corepressor	Ligand-dependent corepressor | mKIAA1795 protein | ligand-dependent corepressor isoform 1 | Helix-turn-helix, Psq containing protein | similar to DKFZP564P1916 protein (predicted), isoform CRA_b | Lcor protein	4	-4,0	ENSOARG00000007855/RPL34	LEF1,HADH,CYP2U1,SGMS2,PAPSS1	.
ENSOARG00000008728	ENSOARP00000009375	0	.	PAPSS1	3'-phosphoadenosine 5'-phosphosulfate synthase 1	1	NP_005434.4 (98.6% identity in aln 100.0% length of target)	XP_011994144.1 (Ovis aries musimon: 99.8% identity in aln 100.0% length of target) | XP_005681387.2 (Capra hircus: 99.8% identity in aln 100.0% length of target) | NP_001029382.1 (Bos taurus: 99.8% identity in aln 100.0% length of target) | XP_006184694.1 (Camelus ferus: 99.3% identity in aln 100.0% length of target) | XP_005978918.1 (Pantholops hodgsonii: 99.8% identity in aln 100.0% length of t…	147	8	5.4	101	5	85.7	bifunctional 3'-phosphoadenosine 5'-phosphosulfate synthase 1	Bifunctional bifunctional 3'-phosphoadenosine 5'-phosphosulfate synthase 1-like | 3'-phosphoadenosine 5'-phosphosulfate synthase 1 | Bifunctional 3'-phosphoadenosine 5'-phosphosulfate synthetase 1 | bifunctional 3'-phosphoadenosine 5'-phosphosulfate synthase 1 isoform a | 3'-phosphoadenosine 5'-phosphosulfate synthetase | Chain B, The Crystal Structure Of Human 3'-phosphoadenosine-5'-phosphosulfa…	.	.	.	.	.
ENSOARG00000008741	ENSOARP00000009382	0	.	DUSP13	dual specificity phosphatase 13	2	.	XP_011974329.1 (Ovis aries musimon: 100.0% identity in aln 87.5% length of target)	11	2	18.2	8	2	90.9	dual specificity protein phosphatase 13	dual specificity protein phosphatase 13 isoform B	0	0	ENSOARG00000008742/ENSBTAG00000047970	.	ENSOARG00000008862/ENSBTAG00000047700
ENSOARG00000008833	ENSOARP00000009477	0	.	TMEM121	transmembrane protein 121	8	.	.	0	0	0	0	0	0	.	.	3	0,+3	ENSOARG00000008869/FUS	PRSS36,PRSS8,KAT8,BCKDK	ENSOARG00000008543/ENSBTAG00000000405
ENSOARG00000008863	ENSOARP00000009516	0	.	PRSS36	protease, serine 36	4	.	.	29	8	27.6	17	6	89.7	polyserase-2	Polyserase-2 | polyserase-2-like isoform 1 | polyserase-2-like isoform 2	0	0	ENSOARG00000017056/ENSBTAG00000039901	.	.
ENSOARG00000008886	ENSOARP00000009542	1	.	OR5V1	OR5V1	1	.	XP_014946511.1 (Ovis aries musimon: 99.4% identity in aln 99.4% length of target) | XP_005701720.1 (Capra hircus: 99.0% identity in aln 96.6% length of target) | XP_005904160.1 (Bos mutus: 96.5% identity in aln 99.4% length of target) | XP_006056179.1 (Bubalus bubalis: 96.8% identity in aln 99.4% length of target) | XP_005965560.1 (Pantholops hodgsonii: 98.4% identity in aln 99.4% length of targe…	9	5	55.6	7	5	100	olfactory receptor 5V1	.	0	0	.	.	ENSOARG00000014477/TNFRSF9
ENSOARG00000008889	ENSOARP00000009543	0	.	VAMP3	vesicle associated membrane protein 3	1	.	XP_012016615.1 (Ovis aries musimon: 96.1% identity in aln 98.1% length of target) | XP_013825722.1 (Capra hircus: 98.0% identity in aln 98.1% length of target) | NP_001039380.1 (Bos taurus: 99.0% identity in aln 98.1% length of target) | XP_006076856.1 (Bubalus bubalis: 99.0% identity in aln 90.2% length of target)	15	6	40	14	5	100	vesicle-associated membrane protein 3	.	.	.	.	.	.
ENSOARG00000008904	ENSOARP00000009559	0	.	ZNF160	zinc finger protein 160-like	8	.	.	0	0	0	0	0	0	.	.	0	0	ENSOARG00000008925/ENSBTAG00000030735	.	.
ENSOARG00000008933	ENSOARP00000009592	1	.	OR2G3	OR2G3	1	.	XP_012025851.1 (Ovis aries musimon: 99.0% identity in aln 99.7% length of target) | XP_005702225.1 (Capra hircus: 97.4% identity in aln 99.7% length of target) | XP_006056174.1 (Bubalus bubalis: 93.9% identity in aln 100.0% length of target) | XP_010832876.1 (Bison bison bison: 99.0% identity in aln 99.7% length of target) | XP_006195485.1 (Camelus ferus: 92.0% identity in aln 99.7% length of tar…	9	6	66.7	7	6	100	olfactory receptor 2G3	.	.	.	.	.	.
ENSOARG00000008942	ENSOARP00000009608	0	.	SLC2A5	solute carrier family 2, facilitated glucose transporter member 5	8	.	.	0	0	0	0	0	0	.	.	.	.	.	.	.
ENSOARG00000008945	ENSOARP00000009600	1	.	OR2W1	OR2W1	1	.	XP_005701607.1 (Capra hircus: 96.5% identity in aln 91.1% length of target) | XP_014335667.1 (Bos mutus: 94.1% identity in aln 91.1% length of target) | XP_002697469.1 (Bos taurus: 93.7% identity in aln 91.1% length of target) | XP_006056187.1 (Bubalus bubalis: 95.1% identity in aln 91.1% length of target) | XP_006215451.1 (Vicugna pacos: 90.2% identity in aln 91.1% length of target)	7	5	71.4	6	4	85.7	olfactory receptor 2W1	olfactory receptor 2W1-like protein	.	.	.	.	.
ENSOARG00000008954	ENSOARP00000009615	0	.	OR2H2	olfactory receptor family 2 subfamily H member 2	1	.	XP_012026116.1 (Ovis aries musimon: 91.9% identity in aln 98.7% length of target) | XP_005701606.1 (Capra hircus: 97.7% identity in aln 95.9% length of target) | XP_005901985.1 (Bos mutus: 90.7% identity in aln 95.9% length of target) | XP_010831946.1 (Bison bison bison: 91.7% identity in aln 96.2% length of target) | XP_005965567.1 (Pantholops hodgsonii: 96.7% identity in aln 95.9% length of tar…	9	8	88.9	4	5	88.9	olfactory receptor 2H2	Olfactory receptor 2H2	0	0	ENSOARG00000008996/MBTPS2	.	.
ENSOARG00000008968	ENSOARP00000009630	1	.	SMS	SMS	1	.	XP_012021816.1 (Ovis aries musimon: 99.7% identity in aln 100.0% length of target) | XP_013832093.1 (Capra hircus: 99.7% identity in aln 100.0% length of target) | XP_014334283.1 (Bos mutus: 98.5% identity in aln 90.5% length of target) | NP_001030548.1 (Bos taurus: 99.5% identity in aln 100.0% length of target) | XP_006048980.1 (Bubalus bubalis: 99.7% identity in aln 97.2% length of target) | XP…	43	11	25.6	26	7	90.7	spermine synthase	spermine synthase-like | spermine synthase-like isoform 1 | Spermine synthase	0	0	.	.	.
ENSOARG00000008979	ENSOARP00000009637	1	.	OR2B11	OR2B11	1	.	XP_012026134.1 (Ovis aries musimon: 99.4% identity in aln 100.0% length of target) | XP_005701603.1 (Capra hircus: 99.0% identity in aln 100.0% length of target) | XP_006192105.1 (Camelus ferus: 91.7% identity in aln 100.0% length of target) | XP_006215449.1 (Vicugna pacos: 91.4% identity in aln 100.0% length of target) | XP_005965570.1 (Pantholops hodgsonii: 98.1% identity in aln 100.0% length o…	13	5	38.5	6	5	92.3	olfactory receptor 2B11	olfactory receptor 2B11-like protein	0	0	.	.	.
ENSOARG00000008989	ENSOARP00000009650	1	.	OR10C1	OR10C1	1	.	XP_012026120.1 (Ovis aries musimon: 99.7% identity in aln 99.7% length of target) | XP_005701488.1 (Capra hircus: 96.2% identity in aln 99.7% length of target) | XP_005911190.1 (Bos mutus: 91.8% identity in aln 100.0% length of target) | XP_002697490.1 (Bos taurus: 95.9% identity in aln 99.7% length of target) | XP_006049948.1 (Bubalus bubalis: 95.9% identity in aln 99.7% length of target) | XP_0…	37	21	56.8	17	7	100	olfactory receptor 10C1	.	0	0	.	.	.
ENSOARG00000009002	ENSOARP00000009663	1	.	OR2B11	OR2B11	1	.	XP_012026117.1 (Ovis aries musimon: 90.1% identity in aln 100.0% length of target) | XP_002697477.1 (Bos taurus: 92.0% identity in aln 100.0% length of target) | XP_006056192.1 (Bubalus bubalis: 90.4% identity in aln 100.0% length of target) | XP_010854857.1 (Bison bison bison: 92.0% identity in aln 100.0% length of target) | XP_005965577.1 (Pantholops hodgsonii: 93.3% identity in aln 100.0% leng…	6	6	100	4	5	83.3	olfactory receptor 2B11	olfactory receptor 2B6-like	0	0	.	.	ENSOARG00000017255/ENSBTAG00000017227
ENSOARG00000009012	ENSOARP00000009677	1	.	OR10C1	OR10C1	1	.	XP_012026120.1 (Ovis aries musimon: 90.5% identity in aln 98.8% length of target) | XP_013832352.1 (Capra hircus: 99.1% identity in aln 100.0% length of target) | XP_005911190.1 (Bos mutus: 96.2% identity in aln 100.0% length of target) | XP_003587760.1 (Bos taurus: 93.0% identity in aln 99.7% length of target) | XP_006049946.1 (Bubalus bubalis: 92.1% identity in aln 99.7% length of target) | XP_…	30	20	66.7	12	6	100	olfactory receptor 10C1	.	0	0	ENSOARG00000017255/ENSBTAG00000012956	.	.
ENSOARG00000009027	ENSOARP00000009692	1	.	OR10C1	OR10C1	1	.	XP_012026135.1 (Ovis aries musimon: 93.0% identity in aln 98.7% length of target) | XP_005696849.1 (Capra hircus: 99.4% identity in aln 99.7% length of target) | XP_005911190.1 (Bos mutus: 92.4% identity in aln 99.7% length of target) | XP_003587760.1 (Bos taurus: 97.5% identity in aln 99.7% length of target) | XP_006049946.1 (Bubalus bubalis: 97.8% identity in aln 99.7% length of target) | XP_01…	86	24	27.9	36	7	100	olfactory receptor 10C1	.	.	.	.	.	.
ENSOARG00000009047	ENSOARP00000009710	1	ENSOARG00000011920	STEAP1	STEAP family member 1	1	NP_036581.1 (90.9% identity in aln 100.0% length of target)	XP_005679361.1 (Capra hircus: 98.5% identity in aln 100.0% length of target) | NP_001192735.1 (Bos taurus: 97.9% identity in aln 100.0% length of target) | XP_006075297.1 (Bubalus bubalis: 98.5% identity in aln 100.0% length of target) | XP_006193855.1 (Camelus ferus: 92.9% identity in aln 100.0% length of target) | XP_006211919.1 (Vicugna pacos: 93.2% identity in aln 100.0% length of target) | X…	31	7	22.6	30	7	87.1	metalloreductase STEAP1	metalloreductase STEAP1-like | six transmembrane epithelial antigen of the prostate 1 (predicted) | six transmembrane epithelial antigen of the prostate	.	.	.	.	.
ENSOARG00000009055	ENSOARP00000009718	0	.	XKR6	XK related 6	4	.	.	6	3	50	5	3	83.3	XK-related protein 6	XK-related protein 6-like	4	-1,+3	.	NKAPL,ZSCAN26,PGBD1,ZSCAN31,ZSCAN12	ENSOARG00000017751/ENSBTAG00000038782
ENSOARG00000009060	ENSOARP00000009722	0	.	ZSCAN26	zinc finger and SCAN domain containing 26	4	.	.	5	5	100	4	4	80	zinc finger and SCAN domain-containing protein 26	zinc finger and SCAN domain-containing protein 26-like	5	-4,+1	.	VIM,TRDMT1,CUBN,RSU1,C1QL3,PTER	.
ENSOARG00000009063	ENSOARP00000009725	0	.	C1QL3	complement C1q like 3	1	.	XP_006176301.2 (Camelus ferus: 100.0% identity in aln 100.0% length of target)	109	2	1.8	122	2	84.4	complement C1q-like protein 3	Complement C1q-like protein 3 | complement C1q-like protein 3-like | complement C1q-like protein 3 precursor | C1q-related factor-like protein | Chain A, Crystal Structure Of C1ql3 Mutant D205a | Chain A, Crystal Structure Of C1ql3 In Space Group H32 | C1QL3 protein | C1q-related factor | Chain A, Crystal Structure Of C1ql3 Mutant D207a	0	0	.	.	.
ENSOARG00000009070	ENSOARP00000009734	1	ENSOARG00000004164	RPL7L1	ribosomal protein L7 like 1	1	.	XP_012020094.1 (Ovis aries musimon: 97.6% identity in aln 100.0% length of target) | XP_005696374.1 (Capra hircus: 95.5% identity in aln 100.0% length of target) | XP_005900192.2 (Bos mutus: 95.1% identity in aln 96.5% length of target) | NP_001193230.1 (Bos taurus: 94.7% identity in aln 100.0% length of target) | XP_006069276.1 (Bubalus bubalis: 95.5% identity in aln 96.5% length of target) | XP…	19	10	52.6	13	7	100	60S ribosomal protein L7-like 1	.	.	.	.	.	.
ENSOARG00000009075	ENSOARP00000009737	0	.	SNURF	SNRPN upstream reading frame	1	NP_005669.2 (95.5% identity in aln 94.4% length of target)	XP_005685566.1 (Capra hircus: 100.0% identity in aln 94.4% length of target) | NP_776888.1 (Bos taurus: 97.0% identity in aln 94.4% length of target)	41	5	12.2	58	4	92.7	SNRPN upstream reading frame protein	SNRPN upstream reading frame protein-like | SNRPN upstream reading frame protein variant 1	0	0	ENSOARG00000018053/ZNF165	.	.
ENSOARG00000009088	ENSOARP00000009747	0	.	ZSCAN16	zinc finger and SCAN domain containing 16	4	.	.	7	7	100	5	6	85.7	zinc finger and SCAN domain-containing protein 16	zinc finger and SCAN domain-containing protein 16-like	2	-1,+1	.	ZDHHC13,MRGPRX2,PTPN5	.
ENSOARG00000009093	ENSOARP00000009757	0	.	MRGPRX2	MAS related GPR family member X2	1	.	XP_005900758.1 (Bos mutus: 90.6% identity in aln 99.4% length of target) | NP_001179379.1 (Bos taurus: 91.2% identity in aln 99.4% length of target)	7	7	100	5	6	85.7	mas-related G-protein coupled receptor member X2	mas-related G-protein coupled receptor member X2-like	.	.	.	.	.
ENSOARG00000009095	ENSOARP00000009761	0	.	FAM205A	family with sequence similarity 205 member A	1	.	XP_012008291.1 (Ovis aries musimon: 99.251% identity in aln 100.0% length of target)XP_012008291.1 (Ovis aries musimon: 99.3% identity in aln 100.0% length of target) | XP_005684277.1 (Capra hircus: 97.5% identity in aln 100.0% length of target)	2	2	100	1	2	100	protein FAM205A	.	3	-1,+2	.	TBCK,AIMP1,GIMD1,DKK2	.
ENSOARG00000009111	ENSOARP00000009777	0	.	AIMP1	aminoacyl tRNA synthetase complex interacting multifunctional protein 1	8	.	.	0	0	0	0	0	0	.	.	.	.	.	.	.
ENSOARG00000009134	ENSOARP00000009799	1	ENSOARG00000009186	OR2B2	olfactory receptor family 2 subfamily B member 2	1	.	XP_012014263.1 (Ovis aries musimon: 98.1% identity in aln 99.7% length of target) | XP_005701753.1 (Capra hircus: 98.1% identity in aln 99.7% length of target) | XP_014339205.1 (Bos mutus: 97.6% identity in aln 100.0% length of target) | XP_002697540.1 (Bos taurus: 96.2% identity in aln 97.5% length of target) | XP_010830619.1 (Bison bison bison: 96.8% identity in aln 96.0% length of target) | XP…	42	12	28.6	32	7	92.9	olfactory receptor 2B2	Olfactory receptor 2B2 | Olfr1360 protein	.	.	.	.	.
ENSOARG00000009186	ENSOARP00000009856	1	ENSOARG00000009134	OR2B2	olfactory receptor family 2 subfamily B member 2	1	.	XP_012014263.1 (Ovis aries musimon: 99.4% identity in aln 100.0% length of target) | XP_005701753.1 (Capra hircus: 98.1% identity in aln 100.0% length of target) | XP_014339205.1 (Bos mutus: 95.5% identity in aln 100.0% length of target) | XP_002697540.1 (Bos taurus: 94.9% identity in aln 97.8% length of target) | XP_010830619.1 (Bison bison bison: 94.9% identity in aln 96.3% length of target) | …	26	11	42.3	19	7	100	olfactory receptor 2B2	.	14	-14,0	ENSOARG00000018539/ENSBTAG00000030269	HSPG2,LDLRAD2,USP48,RAP1GAP,ALPL,ECE1,EIF4G3,HP1BP3,SH2D5,KIF17,DDOST,PINK1,CDA,FAM43B,MUL1	ENSOARG00000018660/CAMK2N1
ENSOARG00000009220	ENSOARP00000009895	0	.	MUL1	mitochondrial E3 ubiquitin protein ligase 1	4	.	.	66	9	13.6	66	8	98.5	mitochondrial ubiquitin ligase activator of NFKB 1	Mitochondrial ubiquitin ligase activator of NFKB 1	.	.	.	.	.
ENSOARG00000009265	ENSOARP00000009940	0	.	FAM26D	family with sequence similarity 26 member D	1	.	XP_005684593.1 (Capra hircus: 99.4% identity in aln 99.7% length of target) | XP_005896925.1 (Bos mutus: 94.9% identity in aln 100.0% length of target) | NP_001094603.1 (Bos taurus: 95.2% identity in aln 99.4% length of target) | XP_006055747.1 (Bubalus bubalis: 95.2% identity in aln 100.0% length of target) | XP_010860126.1 (Bison bison bison: 94.9% identity in aln 100.0% length of target) | XP_…	7	7	100	5	6	100	protein FAM26D	.	.	.	.	.	.
ENSOARG00000009271	ENSOARP00000009949	0	.	CCDC103	coiled-coil domain containing 103	1	.	XP_012012876.1 (Ovis aries musimon: 99.1% identity in aln 100.0% length of target) | XP_005693999.1 (Capra hircus: 98.7% identity in aln 100.0% length of target) | XP_006045623.1 (Bubalus bubalis: 94.9% identity in aln 100.0% length of target) | XP_010830726.1 (Bison bison bison: 95.3% identity in aln 100.0% length of target) | XP_005983757.1 (Pantholops hodgsonii: 98.3% identity in aln 100.0% le…	6	5	83.3	5	5	100	coiled-coil domain-containing protein 103	.	0	0	ENSOARG00000015452/COMMD1	.	ENSOARG00000015443/FAM161A
ENSOARG00000009285	ENSOARP00000009961	1	ENSOARG00000020154	CCT4	chaperonin containing TCP1 subunit 4	1	.	XP_012019091.1 (Ovis aries musimon: 98.7% identity in aln 96.5% length of target) | XP_005889788.1 (Bos mutus: 98.9% identity in aln 96.0% length of target) | NP_001033283.1 (Bos taurus: 98.5% identity in aln 96.5% length of target) | XP_006191396.1 (Camelus ferus: 97.1% identity in aln 97.0% length of target)	158	7	4.4	124	4	93	T-complex protein 1 subunit delta	T-complex protein 1 subunit delta-like | stimulator of TAR RNA binding | T-complex protein 1 subunit delta-like isoform 1 | Chain D, Ca Model Of Bovine TricCCT DERIVED FROM A 4.0 ANGSTROM Cryo-Em Map | chaperonin | T-complex protein 1 subunit delta isoform a | Chain D, The Crystal Structures Of The Eukaryotic Chaperonin Cct Reveal Its Functional Partitioning | chaperonin containing TCP1, subunit …	0	0	.	.	.
ENSOARG00000009288	ENSOARP00000009963	0	.	RPL27	60S ribosomal protein L27	7	.	.	2	0	0	2	0	50	RPL27/NME2 fusion protein	.	1	0,+1	ENSOARG00000009376/USF1	TSTD1,F11R	ENSOARG00000009202/ENSBTAG00000022938
ENSOARG00000009299	ENSOARP00000009975	0	.	TSTD1	thiosulfate sulfurtransferase like domain containing 1	1	.	XP_004002727.1 (Ovis aries: 100.000% identity in aln 100.0% length of target)XP_014338228.1 (Bos mutus: 94.9% identity in aln 100.0% length of target) | XP_002685900.1 (Bos taurus: 93.4% identity in aln 100.0% length of target) | XP_006048562.1 (Bubalus bubalis: 94.9% identity in aln 100.0% length of target)	4	4	100	2	3	100	thiosulfate sulfurtransferase/rhodanese-like domain-containing protein 1	.	4	-2,+2	ENSOARG00000009105/ENSBTAG00000046308	JAZF1,TAX1BP1,HIBADH,EVX1,HOXA13	ENSOARG00000009477/HOXA11
ENSOARG00000009300	ENSOARP00000009977	1	ENSOARG00000011237	HIBADH	3-hydroxyisobutyrate dehydrogenase	1	.	XP_011967681.1 (Ovis aries musimon: 100.0% identity in aln 98.2% length of target) | XP_005679416.1 (Capra hircus: 100.0% identity in aln 100.0% length of target) | XP_005903740.1 (Bos mutus: 99.7% identity in aln 98.2% length of target) | XP_006175760.1 (Camelus ferus: 97.9% identity in aln 98.2% length of target) | XP_006201898.1 (Vicugna pacos: 97.9% identity in aln 98.2% length of target)	76	7	9.2	67	6	90.8	3-hydroxyisobutyrate dehydrogenase, mitochondrial	3-hydroxyisobutyrate dehydrogenase, mitochondrial precursor | 3-hydroxyisobutyrate dehydrogenase, mitochondrial-like	3	-3,0	.	HPF1,CLCN3,NEK1,SH3RF1	ENSOARG00000015541/CBR4
ENSOARG00000009307	ENSOARP00000009983	0	.	SH3RF1	SH3 domain containing ring finger 1	4	.	.	70	9	12.9	40	5	92.9	E3 ubiquitin-protein ligase SH3RF1	Putative E3 ubiquitin-protein ligase SH3RF1 | E3 ubiquitin-protein ligase SH3RF1-like	.	.	.	.	.
ENSOARG00000009331	ENSOARP00000010009	4	ENSOARG00000000494, ENSOARG00000008422, ENSOARG00000009350, ENSOARG00000017657	MAGEA10	MAGE family member A10	1	.	XP_014947054.1 (Ovis aries musimon: 95.019% identity in aln 100.0% length of target)XP_014947054.1 (Ovis aries musimon: 95.0% identity in aln 100.0% length of target) | XP_005700528.1 (Capra hircus: 94.3% identity in aln 100.0% length of target)	2	2	100	1	2	100	melanoma-associated antigen 10-like	.	0	0	ENSOARG00000015612/TBCK	.	.
ENSOARG00000009336	ENSOARP00000010015	0	.	AIMP1	aminoacyl tRNA synthetase complex interacting multifunctional protein 1	1	.	XP_005887365.1 (Bos mutus: 96.6% identity in aln 100.0% length of target) | NP_001030190.2 (Bos taurus: 96.0% identity in aln 100.0% length of target) | XP_006077255.1 (Bubalus bubalis: 95.7% identity in aln 100.0% length of target) | XP_006216226.1 (Vicugna pacos: 91.3% identity in aln 100.0% length of target)	9	5	55.6	6	3	88.9	aminoacyl tRNA synthase complex-interacting multifunctional protein 1	Aminoacyl tRNA synthase complex-interacting multifunctional protein 1	.	.	.	.	.
ENSOARG00000009350	ENSOARP00000010032	4	ENSOARG00000000494, ENSOARG00000008422, ENSOARG00000009331, ENSOARG00000017657	MAGEA10	MAGE family member A10	1	.	XP_005700561.1 (Capra hircus: 98.855% identity in aln 100.0% length of target)XP_014945187.1 (Ovis aries musimon: 99.6% identity in aln 100.0% length of target) | XP_005700561.1 (Capra hircus: 98.9% identity in aln 100.0% length of target) | XP_005966265.1 (Pantholops hodgsonii: 97.7% identity in aln 100.0% length of target)	5	5	100	2	3	100	melanoma-associated antigen 10-like	.	0	0	ENSOARG00000009759/ENSBTAG00000046623	.	.
ENSOARG00000009354	ENSOARP00000010038	0	.	AHCY	adenosylhomocysteinase	6	.	XP_004014555.1 (Ovis aries: 100.000% identity in aln 100.0% length of target)	120	9	7.5	69	8	71.7	adenosylhomocysteinase	.	0	0	.	.	ENSOARG00000015627/NOL4L
ENSOARG00000009365	ENSOARP00000010046	1	ENSOARG00000004020	COMMD7	COMM domain containing 7	1	.	XP_012007067.1 (Ovis aries musimon: 99.5% identity in aln 100.0% length of target) | NP_001030368.1 (Bos taurus: 97.5% identity in aln 100.0% length of target) | XP_006064463.1 (Bubalus bubalis: 98.0% identity in aln 100.0% length of target)	44	5	11.4	45	4	90.9	COMM domain-containing protein 7	COMM domain containing 7, isoform CRA_b | COMM domain-containing protein 7 isoform 1 | COMM domain-containing protein 7-like	.	.	.	.	.
ENSOARG00000009373	ENSOARP00000010056	0	.	SELS	SELS	1	.	XP_014334910.1 (Bos mutus: 100.0% identity in aln 98.2% length of target)	44	7	15.9	32	4	88.6	selenoprotein S	Selenoprotein S | selenoprotein S-like	0	0	.	.	.
ENSOARG00000009375	ENSOARP00000010057	0	.	MPHOSPH6	M-phase phosphoprotein 6	8	.	.	0	0	0	0	0	0	.	.	.	.	.	.	.
ENSOARG00000009377	ENSOARP00000010061	0	.	UGT2C1	UGT2C1	8	.	.	0	0	0	0	0	0	.	.	.	.	.	.	.
ENSOARG00000009402	ENSOARP00000010090	0	.	CNPY2	canopy FGF signaling regulator 2	1	.	XP_006179906.1 (Camelus ferus: 99.5% identity in aln 100.0% length of target)	65	2	3.1	78	2	84.6	protein canopy homolog 2	protein canopy homolog 2 precursor | citrate synthase, mitochondrial | Protein canopy-like protein 2 | Citrate synthase, mitochondrial | protein canopy homolog 2-like | protein canopy homolog 2 isoform 1 precursor	.	.	.	.	.
ENSOARG00000009435	ENSOARP00000010126	0	.	NDUFA9	NADH:ubiquinone oxidoreductase subunit A9	1	.	XP_011984769.1 (Ovis aries musimon: 99.5% identity in aln 100.0% length of target) | XP_005681037.1 (Capra hircus: 99.5% identity in aln 100.0% length of target) | XP_005897993.1 (Bos mutus: 96.3% identity in aln 100.0% length of target) | XP_006053611.1 (Bubalus bubalis: 96.6% identity in aln 100.0% length of target) | XP_010843290.1 (Bison bison bison: 95.9% identity in aln 97.3% length of targ…	12	7	58.3	8	6	83.3	NADH dehydrogenase [ubiquinone] 1 alpha subcomplex subunit 9, mitochondrial	NADH dehydrogenase [ubiquinone] 1 alpha subcomplex subunit 9, mitochondrial precursor | NADH dehydrogenase (ubiquinone) 1 alpha subcomplex, 9, 39kDa	0	0	ENSOARG00000009406/ENSBTAG00000045540	.	.
ENSOARG00000009444	ENSOARP00000010135	0	.	IDS	iduronate 2-sulfatase	1	.	XP_006042357.1 (Bubalus bubalis: 97.9% identity in aln 91.3% length of target) | XP_005975024.1 (Pantholops hodgsonii: 99.3% identity in aln 91.3% length of target)	7	6	85.7	5	5	85.7	iduronate 2-sulfatase	iduronate 2-sulfatase precursor	0	0	.	.	.
ENSOARG00000009448	ENSOARP00000010140	1	ENSOARG00000018400	XRCC6	X-ray repair cross complementing 6	1	.	XP_014338320.1 (Bos mutus: 93.982% identity in aln 99.8% length of target)XP_014338320.1 (Bos mutus: 94.0% identity in aln 99.8% length of target)	1	1	100	1	1	100	X-ray repair cross-complementing protein 6	.	.	.	.	.	.
ENSOARG00000009458	ENSOARP00000010151	0	.	AQP7	aquaporin 7	1	.	XP_005684118.1 (Capra hircus: 98.5% identity in aln 98.5% length of target) | XP_006066762.1 (Bubalus bubalis: 93.8% identity in aln 100.0% length of target) | XP_005967680.1 (Pantholops hodgsonii: 97.5% identity in aln 98.5% length of target)	6	5	83.3	4	4	83.3	aquaporin-7	Aquaporin-7	5	-1,+4	.	HMX2,BUB3,GPR26,CPXM2,CHST15,OAT	ENSOARG00000010209/NKX1-2
ENSOARG00000009467	ENSOARP00000010164	0	.	BUB3	BUB3, mitotic checkpoint protein	1	.	XP_006080476.1 (Bubalus bubalis: 99.7% identity in aln 99.7% length of target)	99	1	1	143	1	84.8	mitotic checkpoint protein BUB3	Mitotic checkpoint protein BUB3 | mitotic checkpoint protein BUB3 isoform a | BUB3 budding uninhibited by benzimidazoles 3-like | WD repeat protein Bub3 | BUB3 budding uninhibited by benzimidazoles 3 homolog (yeast)	.	.	.	.	.
ENSOARG00000009482	ENSOARP00000010180	0	.	ARHGAP19	Rho GTPase activating protein 19	1	.	XP_011992798.1 (Ovis aries musimon: 99.4% identity in aln 100.0% length of target) | XP_005698339.1 (Capra hircus: 98.4% identity in aln 100.0% length of target) | XP_005911203.1 (Bos mutus: 97.9% identity in aln 93.1% length of target) | XP_015316192.1 (Bos taurus: 97.6% identity in aln 100.0% length of target) | XP_006061234.1 (Bubalus bubalis: 97.4% identity in aln 100.0% length of target) | X…	77	8	10.4	47	5	90.9	rho GTPase-activating protein 19	rho GTPase-activating protein 19 isoform 1 | rho GTPase-activating protein 19 isoform 2 | Rho GTPase-activating protein 19 | rho GTPase-activating protein 19 isoform 3	.	.	.	.	.
ENSOARG00000009487	ENSOARP00000010181	0	.	TSR2	TSR2, ribosome maturation factor	8	.	.	0	0	0	0	0	0	.	.	.	.	.	.	.
ENSOARG00000009495	ENSOARP00000010192	0	.	BAP18	BAP18	1	.	XP_011978098.1 (Ovis aries musimon: 98.9% identity in aln 96.9% length of target) | XP_005220278.1 (Bos taurus: 97.8% identity in aln 96.9% length of target) | XP_006060180.1 (Bubalus bubalis: 97.8% identity in aln 96.9% length of target) | XP_014407077.1 (Camelus ferus: 96.8% identity in aln 99.5% length of target) | XP_006219656.1 (Vicugna pacos: 96.2% identity in aln 96.9% length of target)	48	5	10.4	54	5	95.8	chromatin complexes subunit BAP18	chromatin complexes subunit BAP18 isoform 1 | Chromatin complexes subunit BAP18	3	0,+3	ENSOARG00000009646/CDH13	MPHOSPH6,HSD17B2,SDR42E1,PLCG2	ENSOARG00000009368/ENSBTAG00000048177
ENSOARG00000009501	ENSOARP00000010200	0	.	MPHOSPH6	M-phase phosphoprotein 6	1	NP_005783.2 (93.8% identity in aln 100.0% length of target)	XP_012025499.1 (Ovis aries musimon: 100.0% identity in aln 100.0% length of target) | NP_001069032.1 (Bos taurus: 97.5% identity in aln 100.0% length of target) | XP_010849109.1 (Bison bison bison: 97.2% identity in aln 100.0% length of target) | XP_006184017.1 (Camelus ferus: 95.6% identity in aln 100.0% length of target)	48	6	12.5	48	5	93.8	M-phase phosphoprotein 6	MPHOSPH6 | M-phase phosphoprotein 6-like | M-phase phosphoprotein 6 variant	.	.	.	.	.
ENSOARG00000009504	ENSOARP00000010202	0	.	PFDN2	prefoldin subunit 2	1	NP_036526.2 (98.7% identity in aln 100.0% length of target)	NP_001073690.1 (Bos taurus: 100.0% identity in aln 100.0% length of target) | XP_006048554.1 (Bubalus bubalis: 99.4% identity in aln 100.0% length of target) | XP_006215733.1 (Vicugna pacos: 96.1% identity in aln 100.0% length of target) | XP_005958880.1 (Pantholops hodgsonii: 99.4% identity in aln 100.0% length of target)	52	4	7.7	68	4	94.2	prefoldin subunit 2	similar to prefoldin subunit 2-like | prefoldin 2	.	.	.	.	.
ENSOARG00000009513	ENSOARP00000010209	0	.	CYB561D2	cytochrome b561 family member D2	1	NP_008953.1 (95.5% identity in aln 100.0% length of target)	XP_005695979.1 (Capra hircus: 100.0% identity in aln 100.0% length of target) | NP_001014937.1 (Bos taurus: 99.5% identity in aln 100.0% length of target) | XP_015090992.1 (Vicugna pacos: 99.1% identity in aln 97.0% length of target)	80	4	5	79	4	88.8	cytochrome b561 domain-containing protein 2	cytochrome b561 domain-containing protein 2-like | Cytochrome b561 domain-containing protein 2	8	-6,+2	.	TRAF3IP2,FYN,WISP3,TUBE1,FAM229B,LAMA4,MARCKS,HDAC2,HS3ST5	.
ENSOARG00000009527	ENSOARP00000010224	0	.	MARCKS	myristoylated alanine rich protein kinase C substrate	4	.	.	46	3	6.5	36	2	84.8	myristoylated alanine-rich C-kinase substrate	RecName: Full=Myristoylated alanine-rich C-kinase substrate; Short=MARCKS; AltName: Full=Protein kinase C substrate 80 kDa protein | 80K-L protein | 80K protein | RecName: Full=Myristoylated alanine-rich C-kinase substrate; Short=MARCKS; AltName: Full=ACAMP-81 | MARCKS protein | fibrous sheath CABYR-binding protein-like | Marcks protein	5	-4,+1	.	XPNPEP1,ADD3,MXI1,SMNDC1,DUSP5,SMC3	.
ENSOARG00000009537	ENSOARP00000010233	0	.	DUSP5	dual specificity phosphatase 5	2	.	XP_005983262.1 (Pantholops hodgsonii: 95.814% identity in aln 76.5% length of target)XP_005983262.1 (Pantholops hodgsonii: 95.8% identity in aln 76.5% length of target)	3	2	66.7	3	2	100	dual specificity protein phosphatase 5	.	.	.	.	.	.
ENSOARG00000009541	ENSOARP00000010238	0	.	UGT2C1	UGT2C1	6	.	XP_012028264.1 (Ovis aries musimon: 95.745% identity in aln 97.7% length of target)	13	11	84.6	5	6	69.2	UDP-glucuronosyltransferase 2C1-like	.	4	-4,0	ENSOARG00000009105/ENSBTAG00000046308	JAZF1,TAX1BP1,HIBADH,EVX1,HOXA13	ENSOARG00000009477/HOXA11
ENSOARG00000009550	ENSOARP00000010250	0	.	HOXA13	homeobox A13	2	.	XP_006175759.1 (Camelus ferus: 100.0% identity in aln 80.3% length of target)	115	8	7	104	7	85.2	homeobox protein Hox-A13	Hoxa13 protein | HOXA13 | HoxA13 | Homeobox protein Hox-A13 | Hoxa13 protein (predicted) | Homeobox A13 | similar to transcription factor HOXA13 (predicted) | RecName: Full=Homeobox protein Hox-A13 | homeobox A13 (predicted), 3 prime | homeo box A13 | transcription factor HOXA13	0	0	.	.	ENSOARG00000009483/ASIP
ENSOARG00000009562	ENSOARP00000010261	0	.	AHCY	adenosylhomocysteinase	6	.	XP_004014555.1 (Ovis aries: 100.000% identity in aln 97.9% length of target)	115	9	7.8	68	8	73	adenosylhomocysteinase	.	0	0	.	.	.
ENSOARG00000009582	ENSOARP00000010277	1	ENSOARG00000016491	LRAT	lecithin retinol acyltransferase (phosphatidylcholine--retinol O-acyltransferase)	1	.	XP_012006316.1 (Ovis aries musimon: 96.1% identity in aln 100.0% length of target) | XP_005691210.1 (Capra hircus: 96.1% identity in aln 100.0% length of target) | XP_005893609.1 (Bos mutus: 93.5% identity in aln 100.0% length of target) | NP_803469.1 (Bos taurus: 91.7% identity in aln 100.0% length of target) | XP_006061634.1 (Bubalus bubalis: 94.8% identity in aln 100.0% length of target) | XP_…	13	8	61.5	10	6	84.6	lecithin retinol acyltransferase	lecithin retinol acyltransferase-like	1	-1,0	ENSOARG00000009490/GXYLT2	SHQ1,RYBP	.
ENSOARG00000009588	ENSOARP00000010284	0	.	RYBP	RING1 and YY1 binding protein	2	NP_036366.3 (99.4% identity in aln 77.2% length of target)	XP_011976978.1 (Ovis aries musimon: 100.0% identity in aln 77.2% length of target) | XP_006067719.1 (Bubalus bubalis: 100.0% identity in aln 79.9% length of target)	148	8	5.4	142	7	93.9	RING1 and YY1-binding protein	RING1 and YY1-binding protein-like | Ring1 interactor RYBP | RING1 and YY1 binding protein, isoform CRA_a | apoptin-associated protein APAP1 | general transcriptional corepressor trfA-like	6	-4,+2	.	GFAP,KIF18B,C1QL1,DCAKD,NMT1,PLCD3,ACBD4	.
ENSOARG00000009593	ENSOARP00000010296	1	ENSOARG00000019969	NMT1	N-myristoyltransferase 1	1	NP_066565.1 (98.6% identity in aln 100.0% length of target)	NP_803470.2 (Bos taurus: 98.8% identity in aln 100.0% length of target) | XP_010830720.1 (Bison bison bison: 99.0% identity in aln 100.0% length of target) | XP_006173168.1 (Camelus ferus: 98.2% identity in aln 100.0% length of target) | XP_005983761.1 (Pantholops hodgsonii: 99.0% identity in aln 100.0% length of target)	73	5	6.8	68	5	93.2	glycylpeptide N-tetradecanoyltransferase 1	NMT1 protein | myristoyl CoA:protein N-myristoyltransferase | Chain A, Crystal Structure Of Human Myristoyl-Coa:protein N- Myristoyltransferase. | Homo sapiens N-myristoyltransferase 1	.	.	.	.	.
ENSOARG00000009597	ENSOARP00000010293	0	.	HS6ST2	heparan sulfate 6-O-sulfotransferase 2	3	.	XP_013831721.1 (Capra hircus: 99.0% identity in aln 57.8% length of target) | XP_005981664.1 (Pantholops hodgsonii: 98.0% identity in aln 69.1% length of target)	22	8	36.4	10	6	77.3	heparan-sulfate 6-O-sulfotransferase 2	heparan-sulfate 6-O-sulfotransferase 2-like | Heparan-sulfate 6-O-sulfotransferase 2	9	-2,+7	.	NIT1,DEDD,UFC1,USP21,PPOX,B4GALT3,ADAMTS4,NDUFS2,FCER1G,APOA2	.
ENSOARG00000009605	ENSOARP00000010300	1	ENSOARG00000005699	UFC1	ubiquitin-fold modifier conjugating enzyme 1	1	NP_057490.2 (98.8% identity in aln 100.0% length of target)	NP_001015663.1 (Bos taurus: 99.4% identity in aln 100.0% length of target) | XP_010831973.1 (Bison bison bison: 98.8% identity in aln 100.0% length of target)	52	5	9.6	81	3	88.5	ubiquitin-fold modifier-conjugating enzyme 1	Chain A, Crystal Structure Of The Ufc1, Ufm1 Conjugating Enzyme 1 | Chain A, Solution Nmr Structure Of Human E2-Like Ubiquitin-Fold Modifier Conjugating Enzyme 1 (Ufc1). Northeast Structural Genomics Consortium Target Hr41 | Chain A, Crystal Structure Of The Human E2-Like Ubiquitin-Fold Modifier Conjugating Enzyme 1 (Ufc1). Northeast Structural Genomics Consortium Target Hr41 | Ubiquitin-fold mod…	.	.	.	.	.
ENSOARG00000009639	ENSOARP00000010340	0	.	GULO	GULO	1	.	XP_005684101.1 (Capra hircus: 99.1% identity in aln 99.8% length of target) | NP_001029215.1 (Bos taurus: 97.3% identity in aln 99.8% length of target) | XP_006194067.1 (Camelus ferus: 92.7% identity in aln 99.8% length of target) | XP_006203265.1 (Vicugna pacos: 92.7% identity in aln 99.8% length of target)	48	9	18.8	39	7	75	L-gulonolactone oxidase	L-gulonolactone oxidase-like | Gulonolactone (L-) oxidase | L-gulono-gamma-lactone oxidase | Gulo protein	.	.	.	.	.
ENSOARG00000009640	ENSOARP00000010342	1	ENSOARG00000015255	C1GALT1C1	C1GALT1 specific chaperone 1	1	NP_689905.1 (94.7% identity in aln 100.0% length of target)	XP_005700404.1 (Capra hircus: 99.7% identity in aln 100.0% length of target) | NP_001029747.1 (Bos taurus: 98.7% identity in aln 100.0% length of target) | XP_006048872.1 (Bubalus bubalis: 99.1% identity in aln 100.0% length of target) | XP_006189424.1 (Camelus ferus: 96.2% identity in aln 100.0% length of target) | XP_006215966.1 (Vicugna pacos: 95.9% identity in aln 100.0% length of target)	72	6	8.3	68	6	95.8	C1GALT1-specific chaperone 1	c38h2-l1 protein | C1GALT1C1 | C1GALT1-specific chaperone 1 isoform 1	9	-4,+5	.	NIT1,DEDD,UFC1,USP21,PPOX,B4GALT3,ADAMTS4,NDUFS2,FCER1G,APOA2	.
ENSOARG00000009648	ENSOARP00000010355	0	.	PPOX	protoporphyrinogen oxidase	1	NP_000300.1 (91.0% identity in aln 100.0% length of target)	XP_012023511.1 (Ovis aries musimon: 99.0% identity in aln 100.0% length of target) | XP_005677225.1 (Capra hircus: 99.2% identity in aln 100.0% length of target) | XP_005909266.1 (Bos mutus: 98.5% identity in aln 100.0% length of target) | NP_001179355.1 (Bos taurus: 98.3% identity in aln 100.0% length of target) | XP_006048545.1 (Bubalus bubalis: 97.9% identity in aln 100.0% length of target) | …	48	9	18.8	34	7	89.6	protoporphyrinogen oxidase	protoporphyrinogen oxidase isoform 1 | Chain B, Structure Of Human Protoporphyrinogen Ix Oxidase(r59g) | protoporphyrinogen oxidase, isoform CRA_c | RecName: Full=Protoporphyrinogen oxidase; Short=PPO | Chain B, Structure Of Human Protoporphyrinogen Ix Oxidase(r59q)	.	.	.	.	.
ENSOARG00000009669	ENSOARP00000010371	3	ENSOARG00000004858, ENSOARG00000011275, ENSOARG00000019770	HMGN1	high mobility group nucleosome binding domain 1	1	.	XP_012026324.1 (Ovis aries musimon: 97.9% identity in aln 96.0% length of target) | XP_005678075.1 (Capra hircus: 96.9% identity in aln 90.7% length of target) | NP_001029944.1 (Bos taurus: 99.0% identity in aln 96.0% length of target) | XP_006069431.1 (Bubalus bubalis: 97.9% identity in aln 96.0% length of target) | XP_005971462.1 (Pantholops hodgsonii: 92.8% identity in aln 95.1% length of targ…	51	10	19.6	39	8	100	non-histone chromosomal protein HMG-14	.	.	.	.	.	.
ENSOARG00000009680	ENSOARP00000010384	0	.	HOXA9	homeobox A9	1	NP_689952.1 (97.1% identity in aln 100.0% length of target)	NP_001099087.2 (Bos taurus: 99.3% identity in aln 100.0% length of target) | XP_006066136.1 (Bubalus bubalis: 99.3% identity in aln 100.0% length of target) | XP_010853695.1 (Bison bison bison: 91.0% identity in aln 93.7% length of target) | XP_006201896.1 (Vicugna pacos: 96.7% identity in aln 100.0% length of target) | XP_005979330.1 (Pantholops hodgsonii: 99.6% identity in aln 100.0% length of …	39	6	15.4	41	6	89.7	homeobox protein Hox-A9	Homeobox protein Hox-1G | homeodomain protein | Homo sapiens homeo box A9 | homeobox A9 (predicted)	1	0,+1	ENSOARG00000009776/ENSBTAG00000013411	RERE,SLC45A1	.
ENSOARG00000009688	ENSOARP00000010390	0	.	RERE	arginine-glutamic acid dipeptide repeats	4	.	.	82	7	8.5	54	7	91.5	arginine-glutamic acid dipeptide repeats protein	Arginine-glutamic acid dipeptide repeats protein | Arginine-glutamic acid dipeptide repeat protein | arginine-glutamic acid dipeptide repeats protein isoform a | mCG130721 | Rere protein | RERE	.	.	.	.	.
ENSOARG00000009690	ENSOARP00000010391	0	.	DCAF12L2	DDB1- and CUL4-associated factor 12-like protein 2	6	.	XP_004022418.1 (Ovis aries: 100.000% identity in aln 100.0% length of target)	4	3	75	2	3	75	DDB1- and CUL4-associated factor 12-like protein 2	.	6	-2,+4	ENSOARG00000008826/ENSBTAG00000006758	ANHX,CHFR,GOLGA3,ANKLE2,PGAM5,PXMP2,POLE	ENSOARG00000011040/P2RX2
ENSOARG00000009698	ENSOARP00000010408	0	.	GOLGA3	golgin subfamily A member 3	8	.	.	0	0	0	0	0	0	.	.	.	.	.	.	.
ENSOARG00000009703	ENSOARP00000010403	0	.	RPS24	ribosomal protein S24	7	.	.	234	12	5.1	171	4	74.8	40S ribosomal protein S24	.	.	.	.	.	.
ENSOARG00000009708	ENSOARP00000010410	0	.	UGT2C1	UGT2C1	1	.	XP_012023560.1 (Ovis aries musimon: 99.8% identity in aln 100.0% length of target) | XP_005701598.1 (Capra hircus: 98.7% identity in aln 100.0% length of target) | XP_006071198.1 (Bubalus bubalis: 94.1% identity in aln 100.0% length of target) | XP_010850427.1 (Bison bison bison: 95.3% identity in aln 100.0% length of target) | XP_005985501.1 (Pantholops hodgsonii: 97.9% identity in aln 100.0% le…	6	6	100	5	6	83.3	UDP-glucuronosyltransferase 2C1-like	UDP-glucuronosyltransferase 2C1	.	.	.	.	.
ENSOARG00000009712	ENSOARP00000010416	0	.	MLYCD	malonyl-CoA decarboxylase	1	.	XP_005902689.1 (Bos mutus: 98.9% identity in aln 100.0% length of target) | XP_010849111.1 (Bison bison bison: 98.7% identity in aln 97.0% length of target)	8	7	87.5	5	6	87.5	malonyl-CoA decarboxylase, mitochondrial	Malonyl-CoA decarboxylase, mitochondrial	4	-4,0	ENSOARG00000011443/PPP1R13L	ERCC2,KLC3,CKM,MARK4,EXOC3L2	ENSOARG00000009674/ENSBTAG00000030882
ENSOARG00000009716	ENSOARP00000010419	0	.	EXOC3L2	exocyst complex component 3-like protein 2	8	.	.	0	0	0	0	0	0	.	.	6	0,+6	ENSOARG00000009652/SET	WDR34,SPTAN1,GLE1,ODF2,CERCAM,URM1,SLC27A4	.
ENSOARG00000009741	ENSOARP00000010439	0	.	WDR34	WD repeat domain 34	3	.	XP_012002879.1 (Ovis aries musimon: 99.6% identity in aln 50.7% length of target) | XP_013823408.1 (Capra hircus: 98.9% identity in aln 50.7% length of target) | XP_005908547.1 (Bos mutus: 96.7% identity in aln 50.7% length of target) | XP_010808737.1 (Bos taurus: 96.7% identity in aln 61.7% length of target) | XP_006065413.1 (Bubalus bubalis: 96.7% identity in aln 50.5% length of target) | XP_01…	12	11	91.7	5	6	100	WD repeat-containing protein 34	.	.	.	.	.	.
ENSOARG00000009765	ENSOARP00000010466	3	ENSOARG00000004648, ENSOARG00000004667, ENSOARG00000019193	RPL6	ribosomal protein L6	1	.	XP_005709463.2 (Capra hircus: 100.0% identity in aln 100.0% length of target) | XP_014338143.1 (Bos mutus: 99.0% identity in aln 99.3% length of target) | NP_001026926.1 (Bos taurus: 99.0% identity in aln 100.0% length of target) | XP_006047453.1 (Bubalus bubalis: 94.8% identity in aln 100.0% length of target) | XP_014409138.1 (Camelus ferus: 95.5% identity in aln 100.0% length of target) | XP_00…	8	8	100	6	6	87.5	60S ribosomal protein L6	60S ribosomal protein L6-like	.	.	.	.	.
ENSOARG00000009771	ENSOARP00000010472	0	.	RNF113A	ring finger protein 113A	1	NP_008909.1 (93.0% identity in aln 100.0% length of target)	XP_005700351.1 (Capra hircus: 99.7% identity in aln 100.0% length of target) | XP_005887286.1 (Bos mutus: 99.4% identity in aln 100.0% length of target) | NP_001007808.1 (Bos taurus: 99.1% identity in aln 100.0% length of target) | XP_006046178.1 (Bubalus bubalis: 99.7% identity in aln 100.0% length of target) | XP_005962158.1 (Pantholops hodgsonii: 99.7% identity in aln 100.0% length of target)	21	6	28.6	20	5	95.2	RING finger protein 113A	Homo sapiens zinc finger protein 183 (RING finger, C3HC4 type)	0	0	.	.	.
ENSOARG00000009780	ENSOARP00000010485	0	.	ZRANB2	zinc finger RANBP2-type containing 2	8	.	.	0	0	0	0	0	0	.	.	9	-1,+8	.	PPP2R2A,BNIP3L,PNMA2,DPYSL2,ADRA1A,STMN4,TRIM35,PTK2B,CHRNA2,EPHX2	.
ENSOARG00000009786	ENSOARP00000010488	0	.	BNIP3L	BCL2 interacting protein 3 like	1	NP_004322.1 (93.5% identity in aln 99.1% length of target)	NP_001029786.1 (Bos taurus: 96.8% identity in aln 99.1% length of target) | XP_006057392.1 (Bubalus bubalis: 96.3% identity in aln 99.1% length of target)	63	2	3.2	56	2	88.9	BCL2/adenovirus E1B 19 kDa protein-interacting protein 3-like	BCL2/adenovirus E1B 19kDa interacting protein 3-like | BCL2/adenovirus E1B 19 kDa protein-interacting protein 3-like protein | adenovirus E1B19k-binding protein B5 | NIP3-like protein X | My020 protein | sNix | BCL2/adenovirus E1B interacting protein 3-like	3	0,+3	ENSOARG00000009717/HOXA5	HOXA4,HOXA3,HOXA2,HOXA1	.
ENSOARG00000009789	ENSOARP00000010491	0	.	HOXA4	homeobox A4	2	.	XP_005903745.2 (Bos mutus: 97.6% identity in aln 77.1% length of target)	23	6	26.1	19	5	82.6	homeobox protein Hox-A4	homeobox A4 (predicted) | Homeobox protein Hox-A4 | Homeobox A4	0	0	.	.	.
ENSOARG00000009790	ENSOARP00000010492	0	.	OSBPL1A	oxysterol binding protein like 1A	4	.	.	127	22	17.3	43	6	91.3	oxysterol-binding protein-related protein 1	oxysterol-binding protein-related protein 1-like | Oxysterol-binding protein-related protein 1 | oxysterol binding protein-like 1A, isoform CRA_a | oxysterol-binding protein-related protein 1 isoform 2 | oxysterol-binding protein-related protein 1 isoform 3 | oxysterol binding protein-like 1A, isoform CRA_b | oxysterol-binding protein-related protein 1 isoform 1	.	.	.	.	.
ENSOARG00000009799	ENSOARP00000010506	0	.	NBL1	neuroblastoma 1, DAN family BMP antagonist	1	.	XP_012024666.1 (Ovis aries musimon: 98.9% identity in aln 100.0% length of target) | XP_006068162.1 (Bubalus bubalis: 98.9% identity in aln 99.4% length of target)	15	6	40	9	3	100	neuroblastoma suppressor of tumorigenicity 1	.	.	.	.	.	.
ENSOARG00000009816	ENSOARP00000010523	0	.	CELA2A	chymotrypsin-like elastase family member 2A	6	.	XP_005690870.1 (Capra hircus: 99.245% identity in aln 98.5% length of target)	7	6	85.7	5	6	71.4	chymotrypsin-like elastase family member 2A	.	.	.	.	.	.
ENSOARG00000009871	ENSOARP00000010584	0	.	HECTD4	HECT domain E3 ubiquitin protein ligase 4	3	.	XP_012019497.1 (Ovis aries musimon: 99.7% identity in aln 72.3% length of target) | XP_013826201.1 (Capra hircus: 99.6% identity in aln 71.4% length of target) | XP_010826898.1 (Bison bison bison: 99.4% identity in aln 71.4% length of target) | XP_014409137.1 (Camelus ferus: 99.0% identity in aln 71.4% length of target) | XP_015095210.1 (Vicugna pacos: 99.0% identity in aln 71.4% length of target)	28	5	17.9	24	5	100	probable E3 ubiquitin-protein ligase HECTD4	.	0	0	.	.	ENSOARG00000016810/PNMA2
ENSOARG00000009873	ENSOARP00000010583	0	.	BNIP3L	BCL2 interacting protein 3 like	8	.	.	0	0	0	0	0	0	.	.	8	-8,0	.	WASF1,CDC40,METTL24,DDO,SLC22A16,CDK19,AMD1,GTF3C6,RPF2	.
ENSOARG00000009886	ENSOARP00000010603	1	ENSOARG00000015548	RPF2	ribosome production factor 2 homolog	1	.	XP_011993111.1 (Ovis aries musimon: 99.7% identity in aln 100.0% length of target) | XP_005684627.1 (Capra hircus: 99.7% identity in aln 100.0% length of target) | NP_001039548.1 (Bos taurus: 99.7% identity in aln 100.0% length of target) | XP_005984204.1 (Pantholops hodgsonii: 99.7% identity in aln 100.0% length of target)	60	5	8.3	56	4	93.3	ribosome production factor 2 homolog	ribosome production factor 2 homolog isoform 1 | Brix domain-containing protein 1 | RPF2	.	.	.	.	.
ENSOARG00000009925	ENSOARP00000010640	0	.	MRPS17	mitochondrial ribosomal protein S17	1	.	XP_005697805.2 (Capra hircus: 98.6% identity in aln 100.0% length of target)	9	5	55.6	5	2	88.9	28S ribosomal protein S17, mitochondrial	28S ribosomal protein S17, mitochondrial-like	8	-6,+2	.	WASF1,CDC40,METTL24,DDO,SLC22A16,CDK19,AMD1,GTF3C6,RPF2	.
ENSOARG00000009927	ENSOARP00000010650	0	.	AMD1	S-adenosylmethionine decarboxylase proenzyme	8	.	.	0	0	0	0	0	0	.	.	5	-4,+1	ENSOARG00000008671/ZNF827	MMAA,SMAD1,OTUD4,ABCE1,ANAPC10,HHIP	ENSOARG00000010331/ENSBTAG00000039325
ENSOARG00000009933	ENSOARP00000010652	1	ENSOARG00000015261	ANAPC10	anaphase promoting complex subunit 10	1	.	NP_001073826.1 (Bos taurus: 99.5% identity in aln 100.0% length of target)	67	4	6	151	3	83.6	anaphase-promoting complex subunit 10	anaphase-promoting complex subunit 10-like | Chain A, Crystal Structure Of The Apc10DOC1 SUBUNIT OF THE HUMAN Anaphase-Promoting Complex | anaphase-promoting complex subunit 10 isoform 5 | anaphase-promoting complex subunit 10 isoform 2 | anaphase-promoting complex subunit 10 isoform 1 | anaphase promoting complex subunit 10 S homeolog	0	0	ENSOARG00000009410/PTRHD1	.	ENSOARG00000009863/ADCY3
ENSOARG00000009940	ENSOARP00000010660	0	.	CENPO	centromere protein O	8	.	.	0	0	0	0	0	0	.	.	6	-2,+4	.	GBAS,PSPH,CCT6A,SUMF2,PHKG1,CHCHD2,NUPR2	ENSOARG00000010257/ENSBTAG00000031582
ENSOARG00000010011	ENSOARP00000010741	0	.	CCT6A	chaperonin containing TCP1 subunit 6A	1	.	XP_012006620.1 (Ovis aries musimon: 98.9% identity in aln 100.0% length of target) | XP_005697811.2 (Capra hircus: 99.4% identity in aln 100.0% length of target) | NP_001029714.1 (Bos taurus: 99.8% identity in aln 100.0% length of target) | XP_006181531.2 (Camelus ferus: 97.8% identity in aln 93.7% length of target)	96	4	4.2	86	4	92.7	T-complex protein 1 subunit zeta	Chaperonin containing Tcp1, subunit 6a (zeta) | acute morphine dependence related protein 2 | chaperonin containing TCP1, subunit 6A | chaperonin subunit 6A | T-complex protein 1 subunit zeta isoform a | chaperonin containing TCP1, subunit 6A isoform a variant | T-complex protein 1 subunit zeta-2	1	0,+1	.	SNX10,SKAP2	.
ENSOARG00000010012	ENSOARP00000010736	0	.	SNX10	sorting nexin-10	6	.	NP_001068843.1 (Bos taurus: 100.000% identity in aln 100.0% length of target)	7	1	14.3	9	1	71.4	sorting nexin-10	.	0	0	ENSOARG00000010063/DENND2A	.	.
ENSOARG00000010018	ENSOARP00000010744	0	.	MKRN1	makorin ring finger protein 1	7	.	.	1	0	0	1	0	100	E3 ubiquitin-protein ligase makorin-1	.	0	0	.	.	.
ENSOARG00000010091	ENSOARP00000010819	1	.	RPS13	RPS13	1	NP_001008.1 (90.7% identity in aln 100.0% length of target)	XP_005678354.1 (Capra hircus: 95.4% identity in aln 100.0% length of target) | XP_006040151.1 (Bubalus bubalis: 90.1% identity in aln 100.0% length of target) | XP_006195201.1 (Camelus ferus: 91.4% identity in aln 100.0% length of target) | XP_005983319.1 (Pantholops hodgsonii: 93.4% identity in aln 100.0% length of target)	51	6	11.8	140	4	96.1	40S ribosomal protein S13	Chain Z, M48s Late-stage Initiation Complex, Purified From Rabbit Reticulocytes Lysates, Displaying Eif2 Ternary Complex And Eif3 I And G Subunits Relocated To The Intersubunit Face | Phosphatidylinositol-4-phosphate 3-kinase C2 domain-containing subunit alpha	2	-2,0	ENSOARG00000001787/ENSBTAG00000005319	ARMCX2,ARMCX3,ARMCX6	ENSOARG00000010096/ARMCX1
ENSOARG00000010111	ENSOARP00000010841	1	ENSOARG00000010096	ARMCX6	armadillo repeat containing, X-linked 6	1	.	XP_012002143.1 (Ovis aries musimon: 99.7% identity in aln 100.0% length of target) | XP_005700189.1 (Capra hircus: 99.0% identity in aln 100.0% length of target) | XP_005900358.1 (Bos mutus: 93.7% identity in aln 100.0% length of target) | NP_001071593.1 (Bos taurus: 94.0% identity in aln 100.0% length of target) | XP_006051929.1 (Bubalus bubalis: 94.0% identity in aln 100.0% length of target) | …	8	8	100	6	6	100	protein ARMCX6	.	7	-1,+6	ENSOARG00000010535/ENSBTAG00000037729	COPE,DDX49,HOMER3,SUGP2,ARMC6,SLC25A42,TMEM161A,MEF2B	.
ENSOARG00000010119	ENSOARP00000010855	0	.	DDX49	DEAD-box helicase 49	8	.	.	0	0	0	0	0	0	.	.	.	.	.	.	.
ENSOARG00000010154	ENSOARP00000010890	0	.	FJX1	four jointed box 1	3	.	XP_013825290.1 (Capra hircus: 100.0% identity in aln 52.6% length of target) | XP_005890984.1 (Bos mutus: 99.4% identity in aln 63.6% length of target)	75	6	8	61	5	84	four-jointed box protein 1	four-jointed box protein 1 precursor | Four-jointed box protein 1 | four-jointed box protein 1-like | Four-jointed protein-like protein | four jointed box 1	.	.	.	.	.
ENSOARG00000010159	ENSOARP00000010896	0	.	BEX2	brain expressed X-linked 2	1	.	XP_012013576.2 (Ovis aries musimon: 96.1% identity in aln 100.0% length of target) | XP_005700177.1 (Capra hircus: 99.2% identity in aln 100.0% length of target) | NP_001070502.1 (Bos taurus: 97.7% identity in aln 100.0% length of target) | XP_006046735.1 (Bubalus bubalis: 95.3% identity in aln 100.0% length of target) | XP_005963944.1 (Pantholops hodgsonii: 93.0% identity in aln 100.0% length of…	7	7	100	4	5	100	protein BEX2	.	0	0	.	.	ENSOARG00000010192/TMEM266
ENSOARG00000010175	ENSOARP00000010913	0	.	ETFA	electron transfer flavoprotein alpha subunit	5	.	.	11	0	0	7	0	81.8	electron transfer flavoprotein subunit alpha, mitochondrial	electron transfer flavoprotein subunit alpha, mitochondrial-like | Electron transfer flavoprotein subunit alpha, mitochondrial	.	.	.	.	.
ENSOARG00000010259	ENSOARP00000010996	0	.	OR8G1	olfactory receptor family 8 subfamily G member 1 (gene/pseudogene)	1	.	XP_005699758.1 (Capra hircus: 97.4% identity in aln 99.7% length of target) | XP_005902734.1 (Bos mutus: 95.2% identity in aln 99.7% length of target) | XP_002699225.3 (Bos taurus: 95.5% identity in aln 99.7% length of target) | XP_006056142.1 (Bubalus bubalis: 95.5% identity in aln 99.7% length of target) | XP_010827717.1 (Bison bison bison: 95.5% identity in aln 99.7% length of target)	6	6	100	4	5	100	olfactory receptor 8G1	.	.	.	.	.	.
ENSOARG00000010264	ENSOARP00000011006	0	.	PDLIM2	PDZ and LIM domain 2	1	.	XP_012010418.1 (Ovis aries musimon: 99.1% identity in aln 100.0% length of target) | XP_013821577.1 (Capra hircus: 98.3% identity in aln 100.0% length of target) | NP_001029602.1 (Bos taurus: 96.0% identity in aln 100.0% length of target) | XP_006050505.1 (Bubalus bubalis: 95.4% identity in aln 100.0% length of target) | XP_010843781.1 (Bison bison bison: 95.7% identity in aln 100.0% length of ta…	6	6	100	5	6	100	PDZ and LIM domain protein 2	.	4	-4,0	ENSOARG00000010386/FOXA3	SYMPK,RSPH6A,DMWD,DMPK,SIX5	.
ENSOARG00000010273	ENSOARP00000011012	0	.	SIX5	homeobox protein SIX5	8	.	.	0	0	0	0	0	0	.	.	.	.	.	.	.
ENSOARG00000010274	ENSOARP00000011015	0	.	DPPA4	developmental pluripotency associated 4	6	.	XP_012019723.1 (Ovis aries musimon: 96.321% identity in aln 100.0% length of target)	5	4	80	2	3	80	developmental pluripotency-associated protein 4	.	.	.	.	.	.
ENSOARG00000010292	ENSOARP00000011034	0	.	HNRNPC	heterogeneous nuclear ribonucleoproteins C1/C2	8	.	.	0	0	0	0	0	0	.	.	0	0	.	.	.
ENSOARG00000010297	ENSOARP00000011039	0	.	PSMB6	proteasome subunit beta 6	8	.	.	0	0	0	0	0	0	.	.	4	-4,0	.	ENPP5,ENPP4,CLIC5,RUNX2,SUPT3H	.
ENSOARG00000010300	ENSOARP00000011042	0	.	SUPT3H	SPT3 homolog, SAGA and STAGA complex component	1	.	XP_011969435.1 (Ovis aries musimon: 100.0% identity in aln 100.0% length of target) | XP_005696418.1 (Capra hircus: 99.5% identity in aln 100.0% length of target) | NP_001098478.1 (Bos taurus: 98.9% identity in aln 100.0% length of target) | XP_006190776.1 (Camelus ferus: 94.9% identity in aln 100.0% length of target) | XP_006202004.1 (Vicugna pacos: 95.2% identity in aln 100.0% length of target)	57	7	12.3	31	5	96.5	transcription initiation protein SPT3 homolog	Transcription initiation protein SPT3-like protein | Transcription initiation protein SPT3-like	9	0,+9	.	TP53INP2,NCOA6,GGT7,ACSS2,GSS,MYH7B,TRPC4AP,EDEM2,PROCR,MMP24	.
ENSOARG00000010303	ENSOARP00000011046	0	.	TP53INP2	tumor protein p53 inducible nuclear protein 2	4	.	XP_010853182.1 (Bison bison bison: 100.000% identity in aln 48.4% length of target)	4	3	75	3	3	100	tumor protein p53-inducible nuclear protein 2	.	8	-3,+5	ENSOARG00000012916/EBF1	RNF145,UBLCP1,IL12B,ADRA1B,TTC1,PWWP2A,FABP6,CCNJL,C1QTNF2	ENSOARG00000013433/ZBED8
ENSOARG00000010320	ENSOARP00000011068	0	.	ADRA1B	adrenoceptor alpha 1B	1	XP_005265876.1 (98.0% identity in aln 90.2% length of target)	.	112	7	6.2	78	6	88.4	alpha-1B adrenergic receptor	Alpha-1B adrenergic receptor | Adra1b protein | alpha adrenergic receptor subtype alpha 1b | alpha-1B adrenergic receptor-like | adrenergic, alpha-1B-, receptor | alpha-1B adrenergic receptor-like protein | RecName: Full=Alpha-1B adrenergic receptor; AltName: Full=Alpha-1B adrenoreceptor; Short=Alpha-1B adrenoceptor	3	-1,+2	ENSOARG00000010372/POLR3D	PIWIL2,SLC39A14,PPP3CC,SORBS3	.
ENSOARG00000010324	ENSOARP00000011073	0	.	SLC39A14	solute carrier family 39 member 14	1	.	XP_012010380.1 (Ovis aries musimon: 100.0% identity in aln 100.0% length of target) | XP_005684050.1 (Capra hircus: 99.6% identity in aln 100.0% length of target) | XP_005895379.1 (Bos mutus: 99.0% identity in aln 100.0% length of target) | XP_006047975.1 (Bubalus bubalis: 99.0% identity in aln 100.0% length of target) | XP_010843772.1 (Bison bison bison: 98.6% identity in aln 100.0% length of ta…	42	13	31	26	6	88.1	zinc transporter ZIP14	Zinc transporter ZIP14 | zinc transporter ZIP14 isoform 1 | zinc transporter ZIP14 precursor | RecName: Full=Zinc transporter ZIP14; AltName: Full=Solute carrier family 39 member 14; AltName: Full=Zrt- and Irt-like protein 14; Short=ZIP-14; Flags: Precursor	3	-1,+2	.	ERBB3,PA2G4,ZC3H10,ESYT1	.
ENSOARG00000010335	ENSOARP00000011083	0	.	PA2G4	proliferation-associated 2G4	1	NP_006182.2 (99.5% identity in aln 100.0% length of target)	NP_001029871.1 (Bos taurus: 99.7% identity in aln 100.0% length of target) | XP_006179892.1 (Camelus ferus: 99.2% identity in aln 100.0% length of target)	66	2	3	85	2	81.8	proliferation-associated protein 2G4	Proliferation-associated protein 2G4 | PA2G4 protein | cell cycle protein p38-2G4 homolog | Pa2g4 protein | Chain A, The Crystal Structure Of Ebp1 | proliferation associated 2G4 | proliferation-associated protein 2G4-like | Cell cycle protein p38-2G4-like protein	0	0	ENSOARG00000025169/NF1	.	.
ENSOARG00000010371	ENSOARP00000011124	0	.	WSB1	WD repeat and SOCS box-containing protein 1	8	.	.	0	0	0	0	0	0	.	.	8	-5,+3	ENSOARG00000010853/DPY30	SPAST,SLC30A6,NLRC4,YIPF4,BIRC6,TTC27,LTBP1,RASGRP3,FAM98A	ENSOARG00000010279/CRIM1
ENSOARG00000010376	ENSOARP00000011136	1	ENSOARG00000004755	TTC27	tetratricopeptide repeat domain 27	1	.	XP_012018554.1 (Ovis aries musimon: 99.646% identity in aln 100.0% length of target)XP_012018554.1 (Ovis aries musimon: 99.6% identity in aln 100.0% length of target) | XP_005686457.1 (Capra hircus: 98.9% identity in aln 100.0% length of target) | XP_005963891.1 (Pantholops hodgsonii: 98.5% identity in aln 100.0% length of target)	4	4	100	2	3	100	tetratricopeptide repeat protein 27	.	.	.	.	.	.
ENSOARG00000010379	ENSOARP00000011133	0	.	NRG3	neuregulin 3	1	XP_011537480.1 (91.1% identity in aln 97.9% length of target)	XP_014418013.1 (Camelus ferus: 90.0% identity in aln 99.7% length of target)	24	4	16.7	11	3	95.8	pro-neuregulin-3, membrane-bound isoform	pro-neuregulin-3, membrane-bound isoform-like	0	0	.	.	.
ENSOARG00000010383	ENSOARP00000011134	2	ENSOARG00000015241, ENSOARG00000015382	HMGB2	high mobility group box 2	1	NP_002120.1 (98.6% identity in aln 100.0% length of target)	XP_006203236.1 (Vicugna pacos: 97.1% identity in aln 99.5% length of target)	18	1	5.6	29	1	83.3	high mobility group protein B2	high mobility group protein B2-like | rCG63620	0	0	.	.	.
ENSOARG00000010402	ENSOARP00000011157	0	.	KIF11	kinesin family member 11	8	.	.	0	0	0	0	0	0	.	.	0	0	ENSOARG00000016729/FADS6	.	.
ENSOARG00000010413	ENSOARP00000011166	2	ENSOARG00000002764, ENSOARG00000008168	RPS25	ribosomal protein S25	1	NP_001019.1 (97.6% identity in aln 100.0% length of target)	.	30	1	3.3	94	1	83.3	40S ribosomal protein S25	40S ribosomal protein S25-like | mCG1027072 | mCG10725, isoform CRA_b	3	-3,0	ENSOARG00000010566/ENSBTAG00000034519	HMGA1,GRM4,MLN,LEMD2	ENSOARG00000010416/IP6K3
ENSOARG00000010446	ENSOARP00000011205	0	.	LEMD2	LEM domain containing 2	1	.	XP_005891470.1 (Bos mutus: 98.5% identity in aln 100.0% length of target) | XP_006050398.1 (Bubalus bubalis: 97.4% identity in aln 100.0% length of target) | XP_010847020.1 (Bison bison bison: 98.3% identity in aln 97.7% length of target)	67	6	9	59	5	97	LEM domain-containing protein 2	LEM domain-containing protein 2 isoform 1	2	-1,+1	.	UBXN8,GSR,GTF2E2	.
ENSOARG00000010451	ENSOARP00000011212	0	.	GSR	glutathione-disulfide reductase	1	.	XP_005698863.1 (Capra hircus: 99.5% identity in aln 100.0% length of target) | XP_006076267.1 (Bubalus bubalis: 99.0% identity in aln 97.4% length of target) | XP_010837114.1 (Bison bison bison: 99.0% identity in aln 100.0% length of target) | XP_014423128.1 (Camelus ferus: 95.9% identity in aln 100.0% length of target) | XP_006201208.1 (Vicugna pacos: 95.6% identity in aln 100.0% length of targe…	69	8	11.6	45	7	91.3	glutathione reductase, mitochondrial	Glutathione reductase, mitochondrial | mitochondrial glutathione reductase | glutathione reductase	.	.	.	.	.
ENSOARG00000010485	ENSOARP00000011252	0	.	CKMT1	CKMT1	1	.	XP_006042691.1 (Bubalus bubalis: 99.8% identity in aln 100.0% length of target) | XP_005956499.1 (Pantholops hodgsonii: 99.8% identity in aln 100.0% length of target)	55	4	7.3	50	4	80	creatine kinase U-type, mitochondrial	creatine kinase U-type, mitochondrial-like | creatine kinase, mitochondrial 1A precursor (predicted) | creatine kinase U-type, mitochondrial precursor | creatine kinase, ubiquitous mitochondrial precursor (predicted) | creatine kinase U-type, mitochondrial isoform 1 | creatine kinase, mitochondrial 1 (ubiquitous) | ubiquitous mitochondrial creatine kinase precursor variant	.	.	.	.	.
ENSOARG00000010490	ENSOARP00000011263	1	ENSOARG00000006058	DCLK1	doublecortin like kinase 1	1	.	XP_010809041.1 (Bos taurus: 100.0% identity in aln 98.6% length of target)	24	4	16.7	19	3	91.7	serine/threonine-protein kinase DCLK1	Serine/threonine-protein kinase DCLK1	.	.	.	.	.
ENSOARG00000010501	ENSOARP00000011269	0	.	BBIP1	BBSome interacting protein 1	1	.	XP_005698525.1 (Capra hircus: 100.0% identity in aln 100.0% length of target)	5	2	40	5	2	100	BBSome-interacting protein 1	.	0	0	.	.	.
ENSOARG00000010503	ENSOARP00000011270	0	.	PITHD1	PITH domain containing 1	8	.	.	0	0	0	0	0	0	.	.	1	0,+1	.	TRUB2,SWI5	ENSOARG00000010745/GOLGA2
ENSOARG00000010579	ENSOARP00000011351	1	ENSOARG00000003785	TRUB2	TruB pseudouridine synthase family member 2	1	.	XP_012002920.1 (Ovis aries musimon: 99.7% identity in aln 100.0% length of target) | XP_005687242.1 (Capra hircus: 97.9% identity in aln 100.0% length of target) | XP_005908529.1 (Bos mutus: 96.1% identity in aln 100.0% length of target) | XP_005213305.1 (Bos taurus: 95.8% identity in aln 90.7% length of target) | XP_006065437.1 (Bubalus bubalis: 96.7% identity in aln 100.0% length of target) | X…	8	7	87.5	6	6	100	probable tRNA pseudouridine synthase 2	.	14	-14,0	.	FANCE,PPARD,DEF6,ZNF76,SCUBE3,TCP11,ANKS1A,TAF11,UHRF1BP1,SNRPC,C6orf106,SPDEF,PACSIN1,RPS10,NUDT3	ENSOARG00000010566/ENSBTAG00000034519
ENSOARG00000010583	ENSOARP00000011354	0	.	NUDT3	nudix hydrolase 3	3	.	XP_011967414.1 (Ovis aries musimon: 99.020% identity in aln 59.6% length of target)XP_011967414.1 (Ovis aries musimon: 99.0% identity in aln 59.6% length of target)	1	1	100	0	1	100	diphosphoinositol polyphosphate phosphohydrolase 1	.	1	-1,0	ENSOARG00000010951/DNAJC11	CAMTA1,VAMP3	.
ENSOARG00000010590	ENSOARP00000011358	0	.	VAMP3	vesicle associated membrane protein 3	8	.	.	0	0	0	0	0	0	.	.	14	-13,+1	.	FANCE,PPARD,DEF6,ZNF76,SCUBE3,TCP11,ANKS1A,TAF11,UHRF1BP1,SNRPC,C6orf106,SPDEF,PACSIN1,RPS10,NUDT3	ENSOARG00000010566/ENSBTAG00000034519
ENSOARG00000010592	ENSOARP00000011361	1	ENSOARG00000011629	RPS10	ribosomal protein S10	1	NP_001005.1 (99.4% identity in aln 100.0% length of target)	XP_005983527.1 (Pantholops hodgsonii: 95.8% identity in aln 100.0% length of target)	56	2	3.6	135	2	94.6	40S ribosomal protein S10	mCG129780 | LOC549472 protein | mCG16751	.	.	.	.	.
ENSOARG00000010612	ENSOARP00000011384	0	.	OR1F1	olfactory receptor family 1 subfamily F member 1	1	.	XP_012011550.2 (Ovis aries musimon: 91.2% identity in aln 98.4% length of target) | XP_005697974.1 (Capra hircus: 98.4% identity in aln 99.1% length of target) | XP_002697920.1 (Bos taurus: 95.6% identity in aln 99.1% length of target) | XP_006054990.1 (Bubalus bubalis: 95.2% identity in aln 99.1% length of target) | XP_010838782.1 (Bison bison bison: 95.2% identity in aln 99.1% length of target)…	14	12	85.7	6	6	100	olfactory receptor 1F1	.	.	.	.	.	.
ENSOARG00000010621	ENSOARP00000011396	0	.	OR1F1	olfactory receptor family 1 subfamily F member 1	8	.	.	0	0	0	0	0	0	.	.	0	0	ENSOARG00000003260/PAM16	.	ENSOARG00000003187/ENSBTAG00000009201
ENSOARG00000010641	ENSOARP00000011415	0	.	VASN	vasorin	4	.	.	43	5	11.6	34	4	88.4	vasorin	vasorin precursor | slit-like 2 | vasorin-like | CSRV314	0	0	.	.	.
ENSOARG00000010657	ENSOARP00000011431	0	.	TARDBP	TAR DNA binding protein	2	NP_031401.1 (96.4% identity in aln 80.9% length of target)	XP_011966683.1 (Ovis aries musimon: 99.4% identity in aln 80.9% length of target) | NP_001039950.2 (Bos taurus: 99.4% identity in aln 80.9% length of target) | XP_005967430.1 (Pantholops hodgsonii: 99.1% identity in aln 80.9% length of target)	85	3	3.5	120	3	92.9	TAR DNA-binding protein 43	TAR DNA-binding protein 43 isoform 6 | TAR DNA-binding protein 43 isoform 1 | TAR DNA-binding protein 43-like | TAR DNA binding protein variant | TDP43 | mCG16669, isoform CRA_e	0	0	.	.	ENSOARG00000010738/ENSBTAG00000018323
ENSOARG00000010669	ENSOARP00000011446	0	.	FGF13	fibroblast growth factor 13	1	.	XP_006217428.1 (Vicugna pacos: 99.2% identity in aln 100.0% length of target)	35	1	2.9	114	1	80	fibroblast growth factor 13	fibroblast growth factor 13 isoform 1 | fibroblast growth factor homologous factor 2 | fibroblast growth factor-related protein FGF-13 | RecName: Full=Fibroblast growth factor 13; Short=FGF-13; Short=xFGF13 | fibroblast growth factor 13-like | fibroblast growth factor homologous factor 2 isoform 1T+1S'	0	0	.	.	.
ENSOARG00000010676	ENSOARP00000011457	1	ENSOARG00000008794	DNAJA1	DnaJ heat shock protein family (Hsp40) member A1	1	.	XP_014960916.1 (Ovis aries musimon: 96.7% identity in aln 100.0% length of target) | XP_005684107.1 (Capra hircus: 99.2% identity in aln 100.0% length of target) | NP_001015637.1 (Bos taurus: 98.5% identity in aln 100.0% length of target) | XP_006182764.1 (Camelus ferus: 99.0% identity in aln 100.0% length of target) | XP_005967672.1 (Pantholops hodgsonii: 99.2% identity in aln 100.0% length of t…	67	6	9	89	5	85.1	dnaJ homolog subfamily A member 1	dnaJ homolog subfamily A member 1-like | Heat shock 40 kDa protein 4 | DnaJ subfamily A member 1 | RecName: Full=DnaJ homolog subfamily A member 1; AltName: Full=DnaJ protein homolog 2; Short=DJ-2; AltName: Full=Mydj2; Flags: Precursor | DnaJ (Hsp40) homolog, subfamily A, member 1 | DnaJ like protein subfamily A member 1 | DnaJ protein homolog | dnaJ homolog subfamily A member 1 isoform 1 | mCG22…	.	.	.	.	.
ENSOARG00000010725	ENSOARP00000011503	0	.	GOSR2	golgi SNAP receptor complex member 2	1	XP_016880878.1 (92.3% identity in aln 100.0% length of target)	XP_005906016.1 (Bos mutus: 99.5% identity in aln 100.0% length of target) | NP_001092355.1 (Bos taurus: 99.5% identity in aln 100.0% length of target) | XP_006042367.1 (Bubalus bubalis: 100.0% identity in aln 100.0% length of target) | XP_006194481.1 (Camelus ferus: 95.3% identity in aln 100.0% length of target) | XP_005983772.1 (Pantholops hodgsonii: 99.5% identity in aln 100.0% length of target)	109	6	5.5	80	5	93.6	Golgi SNAP receptor complex member 2	golgi SNARE | Golgi SNAP receptor complex member 2 isoform B | Golgi SNAP receptor complex member 2 isoform A | Golgi SNAP receptor complex member 2-like protein | Golgi SNAP receptor complex member 2-like isoform 1 | Golgi SNAP receptor complex member 2 isoform D	5	-4,+1	.	PPP1R3F,FOXP3,CCDC22,CACNA1F,SYP,PRICKLE3	ENSOARG00000010859/ENSBTAG00000016093
ENSOARG00000010747	ENSOARP00000011526	0	.	SYP	synaptophysin	3	NP_003170.1 (96.4% identity in aln 62.3% length of target)	XP_005887703.1 (Bos mutus: 100.0% identity in aln 62.3% length of target) | NP_776388.1 (Bos taurus: 99.5% identity in aln 63.5% length of target) | XP_006073717.1 (Bubalus bubalis: 99.5% identity in aln 62.3% length of target) | XP_005957033.1 (Pantholops hodgsonii: 100.0% identity in aln 58.4% length of target)	68	4	5.9	57	3	79.4	synaptophysin	Synaptophysin | Major synaptic vesicle protein p38 | RecName: Full=Synaptophysin; AltName: Full=Major synaptic vesicle protein p38 | RecName: Full=Synaptophysin | synaptophysin isoform 2 | synaptophysin isoform 1 | prickle-like protein 3 | Prickle-like protein 3 | synaptophysin-TagRFP-T fusion | SYP	0	0	.	.	.
ENSOARG00000010752	ENSOARP00000011533	0	.	ALDH3A2	aldehyde dehydrogenase 3 family member A2	8	.	.	0	0	0	0	0	0	.	.	0	0	ENSOARG00000010819/ENSBTAG00000047342	.	ENSOARG00000010813/WBSCR17
ENSOARG00000010757	ENSOARP00000011537	0	.	AUTS2	autism susceptibility candidate 2	7	.	.	151	4	2.6	109	4	72.2	autism susceptibility gene 2 protein	.	0	0	.	.	ENSOARG00000010742/MFSD6
ENSOARG00000010790	ENSOARP00000011571	0	.	INPP1	inositol polyphosphate-1-phosphatase	8	.	.	0	0	0	0	0	0	.	.	0	0	ENSOARG00000010777/ENSBTAG00000047342	.	ENSOARG00000010819/WBSCR17
ENSOARG00000010825	ENSOARP00000011605	0	.	AUTS2	autism susceptibility candidate 2	4	.	.	160	5	3.1	69	4	79.4	autism susceptibility gene 2 protein	autism susceptibility gene 2 protein-like | Autism susceptibility protein 2 protein | Autism susceptibility gene 2 protein | hCG17069, isoform CRA_b | autism susceptibility protein | KIAA0442 | autism susceptibility gene 2 protein isoform 1 | hCG17069, isoform CRA_a | autism susceptibility gene 2 protein isoform 3 | autism susceptibility gene 2 protein isoform 2 | unknown	.	.	.	.	.
ENSOARG00000010827	ENSOARP00000011608	0	.	CXXC4	CXXC finger protein 4	2	.	XP_010846650.1 (Bison bison bison: 99.5% identity in aln 86.5% length of target)	52	5	9.6	58	4	88.5	CXXC-type zinc finger protein 4	CXXC-type zinc finger protein 4-like | CXXC finger 4, isoform CRA_b	0	0	ENSOARG00000010884/ENSBTAG00000038268	.	.
ENSOARG00000010850	ENSOARP00000011632	1	.	TM9SF2	TM9SF2	1	.	XP_011962637.1 (Ovis aries: 100.000% identity in aln 100.0% length of target)XP_013831743.1 (Capra hircus: 99.7% identity in aln 100.0% length of target) | XP_005227601.1 (Bos taurus: 95.9% identity in aln 100.0% length of target) | XP_006049523.1 (Bubalus bubalis: 95.8% identity in aln 96.8% length of target)	5	5	100	3	4	100	transmembrane 9 superfamily member 2-like	.	0	0	ENSOARG00000015168/AP1S1	.	.
ENSOARG00000010858	ENSOARP00000011641	0	.	VGF	VGF nerve growth factor inducible	2	.	XP_013832248.1 (Capra hircus: 98.7% identity in aln 75.2% length of target)	23	7	30.4	18	6	91.3	neurosecretory protein VGF	Neurosecretory protein VGF | RecName: Full=Neurosecretory protein VGF; Contains: RecName: Full=Peptide V; AltName: Full=AQEE-30; AltName: Full=VGF-derived peptide; Contains: RecName: Full=Neuroendocrine regulatory peptide-1; Short=NERP-1; Contains: RecName: Full=Neuroendocrine regulatory peptide-2; Short=NERP-2; Flags: Precursor	0	0	ENSOARG00000018733/CHCHD3	.	ENSOARG00000010977/LRGUK
ENSOARG00000010862	ENSOARP00000011648	1	ENSOARG00000006833	EXOC4	exocyst complex component 4	1	.	XP_014410703.1 (Camelus ferus: 96.7% identity in aln 92.5% length of target)	114	10	8.8	60	7	80.7	exocyst complex component 4	exocyst complex component 4-like | Exocyst complex component 4 | mKIAA1699 protein | Sec8	1	0,+1	ENSOARG00000010983/ENSBTAG00000007010	CTBP2,ZRANB1	.
ENSOARG00000010918	ENSOARP00000011708	0	.	CTBP2	C-terminal-binding protein 2	8	.	.	0	0	0	0	0	0	.	.	.	.	.	.	.
ENSOARG00000010924	ENSOARP00000011712	0	.	EXOSC6	exosome component 6	4	.	.	44	2	4.5	44	2	97.7	exosome complex component MTR3	exosome complex component RRP41-like protein	0	0	.	.	.
ENSOARG00000010938	ENSOARP00000011728	0	.	SLC39A14	solute carrier family 39 member 14	8	.	.	0	0	0	0	0	0	.	.	.	.	.	.	.
ENSOARG00000010940	ENSOARP00000011732	0	.	SKP2	S-phase kinase-associated protein 2, E3 ubiquitin protein ligase	1	.	XP_005694850.1 (Capra hircus: 99.5% identity in aln 100.0% length of target) | XP_005221657.1 (Bos taurus: 98.2% identity in aln 100.0% length of target) | XP_006074939.1 (Bubalus bubalis: 98.6% identity in aln 100.0% length of target) | XP_006185192.1 (Camelus ferus: 94.3% identity in aln 100.0% length of target) | XP_006199728.1 (Vicugna pacos: 94.7% identity in aln 100.0% length of target) | X…	30	6	20	32	6	96.7	S-phase kinase-associated protein 2	S-phase kinase-associated protein 2 isoform 1	0	0	.	.	.
ENSOARG00000010961	ENSOARP00000011751	1	ENSOARG00000019901	KATNBL1	katanin regulatory subunit B1 like 1	1	NP_078989.1 (93.4% identity in aln 100.0% length of target)	XP_005685509.1 (Capra hircus: 99.0% identity in aln 100.0% length of target) | NP_001185993.1 (Bos taurus: 98.0% identity in aln 100.0% length of target) | XP_006056074.1 (Bubalus bubalis: 98.7% identity in aln 100.0% length of target) | XP_010842472.1 (Bison bison bison: 97.3% identity in aln 99.3% length of target) | XP_006194450.1 (Camelus ferus: 94.7% identity in aln 100.0% length of target) …	71	10	14.1	61	7	94.4	KATNB1-like protein 1	KATNB1-like protein 1-like | chromosome 15 open reading frame 29	0	0	.	.	.
ENSOARG00000010995	ENSOARP00000011791	1	ENSOARG00000002849	PPDPF	pancreatic progenitor cell differentiation and proliferation factor	1	.	XP_014339053.1 (Bos mutus: 98.2% identity in aln 94.8% length of target) | XP_010809715.1 (Bos taurus: 97.2% identity in aln 94.8% length of target) | XP_010834882.1 (Bison bison bison: 96.3% identity in aln 94.8% length of target) | XP_015099411.1 (Vicugna pacos: 92.7% identity in aln 94.8% length of target)	8	5	62.5	6	4	87.5	pancreatic progenitor cell differentiation and proliferation factor	pancreatic progenitor cell differentiation and proliferation factor-like	.	.	.	.	.
ENSOARG00000011001	ENSOARP00000011795	0	.	N4BP2L2	NEDD4 binding protein 2 like 2	3	.	XP_012003656.1 (Ovis aries musimon: 99.639% identity in aln 70.0% length of target)XP_012003656.1 (Ovis aries musimon: 99.6% identity in aln 70.0% length of target) | XP_005687582.1 (Capra hircus: 98.8% identity in aln 70.0% length of target)	2	2	100	1	2	100	NEDD4-binding protein 2-like 2	.	14	-7,+7	.	FANCE,PPARD,DEF6,ZNF76,SCUBE3,TCP11,ANKS1A,TAF11,UHRF1BP1,SNRPC,C6orf106,SPDEF,PACSIN1,RPS10,NUDT3	ENSOARG00000010566/ENSBTAG00000034519
ENSOARG00000011006	ENSOARP00000011801	0	.	TAF11	TATA-box binding protein associated factor 11	1	.	XP_011967397.1 (Ovis aries musimon: 97.1% identity in aln 100.0% length of target) | XP_005696301.1 (Capra hircus: 97.1% identity in aln 100.0% length of target) | NP_001029448.1 (Bos taurus: 96.7% identity in aln 100.0% length of target) | XP_006050418.1 (Bubalus bubalis: 96.6% identity in aln 99.0% length of target) | XP_005979803.1 (Pantholops hodgsonii: 97.6% identity in aln 100.0% length of …	6	5	83.3	6	5	100	transcription initiation factor TFIID subunit 11	.	0	0	.	.	ENSOARG00000010822/C17orf47
ENSOARG00000011009	ENSOARP00000011815	0	.	TEX14	testis expressed 14, intercellular bridge forming factor	1	.	XP_012025740.2 (Ovis aries musimon: 99.464% identity in aln 99.3% length of target)XP_012025740.2 (Ovis aries musimon: 99.5% identity in aln 99.3% length of target) | XP_005219954.1 (Bos taurus: 94.5% identity in aln 100.0% length of target) | XP_010859931.1 (Bison bison bison: 94.0% identity in aln 100.0% length of target)	3	3	100	2	3	100	inactive serine/threonine-protein kinase TEX14	.	0	0	.	.	.
ENSOARG00000011013	ENSOARP00000011806	2	ENSOARG00000008182, ENSOARG00000020142	MED4	mediator complex subunit 4	1	.	XP_005908205.1 (Bos mutus: 96.7% identity in aln 100.0% length of target) | NP_001029658.1 (Bos taurus: 97.0% identity in aln 100.0% length of target) | XP_006060896.1 (Bubalus bubalis: 97.0% identity in aln 100.0% length of target) | XP_010832347.1 (Bison bison bison: 96.7% identity in aln 100.0% length of target) | XP_006218697.1 (Vicugna pacos: 96.3% identity in aln 100.0% length of target) | …	70	6	8.6	67	5	84.3	mediator of RNA polymerase II transcription subunit 4	Mediator complex subunit 4 | VDRIP | mediator of RNA polymerase II transcription, subunit 4 homolog | mediator of RNA polymerase II transcription, subunit 4 homolog (yeast) | Mediator of RNA polymerase II transcription subunit 4 | mediator of RNA polymerase II transcription subunit 4 isoform 1 | p36 TRAP/SMCC/PC2 subunit | mediator complex subunit 4	0	0	ENSOARG00000011039/ENSBTAG00000036321	.	ENSOARG00000010975/ENSBTAG00000019977
ENSOARG00000011025	ENSOARP00000011822	1	.	PRAME	PRAME	1	.	XP_014331884.1 (Bos mutus: 93.7% identity in aln 100.0% length of target) | XP_005217315.1 (Bos taurus: 94.5% identity in aln 100.0% length of target) | XP_006074529.1 (Bubalus bubalis: 94.1% identity in aln 100.0% length of target) | XP_010848547.1 (Bison bison bison: 94.3% identity in aln 100.0% length of target) | XP_005966398.1 (Pantholops hodgsonii: 95.8% identity in aln 100.0% length of tar…	5	5	100	4	4	100	melanoma antigen preferentially expressed in tumors	.	.	.	.	.	.
ENSOARG00000011028	ENSOARP00000011823	2	ENSOARG00000011194, ENSOARG00000016890	OR140	OR140	1	.	XP_013825327.1 (Capra hircus: 96.7% identity in aln 100.0% length of target) | XP_005911284.1 (Bos mutus: 95.7% identity in aln 100.0% length of target) | XP_003587067.1 (Bos taurus: 96.0% identity in aln 100.0% length of target) | XP_006057469.1 (Bubalus bubalis: 96.0% identity in aln 100.0% length of target) | XP_010840736.1 (Bison bison bison: 95.7% identity in aln 100.0% length of target) | X…	9	7	77.8	6	6	88.9	olfactory receptor 140	Olfactory receptor 140	0	0	.	.	.
ENSOARG00000011042	ENSOARP00000011838	1	.	TMEM198	TMEM198	1	.	XP_012016136.1 (Ovis aries musimon: 99.7% identity in aln 100.0% length of target) | XP_010837488.1 (Bison bison bison: 98.0% identity in aln 100.0% length of target) | XP_015106919.1 (Vicugna pacos: 95.1% identity in aln 99.7% length of target) | XP_005975583.1 (Pantholops hodgsonii: 98.6% identity in aln 98.1% length of target)	29	5	17.2	24	5	89.7	transmembrane protein 198-like	transmembrane protein 198	.	.	.	.	.
ENSOARG00000011047	ENSOARP00000011840	2	ENSOARG00000008493, ENSOARG00000017773	OR4C46	olfactory receptor family 4 subfamily C member 46	1	.	XP_012025475.1 (Ovis aries musimon: 99.7% identity in aln 98.7% length of target) | XP_005690241.1 (Capra hircus: 98.4% identity in aln 98.7% length of target) | XP_005911288.2 (Bos mutus: 95.4% identity in aln 98.4% length of target) | XP_002693637.4 (Bos taurus: 95.4% identity in aln 98.4% length of target) | XP_010840763.1 (Bison bison bison: 96.3% identity in aln 90.5% length of target) | XP_…	7	7	100	4	5	100	olfactory receptor 4C46	.	1	-1,0	.	ZHX2,HAS2	ENSOARG00000011105/ENSBTAG00000009474
ENSOARG00000011053	ENSOARP00000011850	0	.	HAS2	hyaluronan synthase 2	1	NP_005319.1 (99.1% identity in aln 100.0% length of target)	XP_005892042.1 (Bos mutus: 99.6% identity in aln 100.0% length of target) | NP_776504.1 (Bos taurus: 99.6% identity in aln 100.0% length of target) | XP_006190468.1 (Camelus ferus: 99.5% identity in aln 100.0% length of target)	118	9	7.6	139	5	88.1	hyaluronan synthase 2	hyaluronan synthase 2-like | Hyaluronan synthase 2 | phospholipase B-like 1 | hyaluronan synthase 3 | RecName: Full=Hyaluronan synthase 2; AltName: Full=Hyaluronate synthase 2; AltName: Full=Hyaluronic acid synthase 2 | hyaluronan synthase 2 precursor | RecName: Full=Hyaluronan synthase 2; AltName: Full=Hyaluronate synthase 2; AltName: Full=Hyaluronic acid synthase 2; Short=CHAS2; Short=HA syntha…	0	0	ENSOARG00000002082/BAG1	.	.
ENSOARG00000011079	ENSOARP00000011876	1	ENSOARG00000009506	CHMP5	charged multivesicular body protein 5	1	.	NP_001029854.1 (Bos taurus: 96.3% identity in aln 100.0% length of target) | XP_006182768.2 (Camelus ferus: 93.3% identity in aln 97.2% length of target) | XP_006216883.1 (Vicugna pacos: 96.8% identity in aln 100.0% length of target)	52	3	5.8	90	3	92.3	charged multivesicular body protein 5	Charged multivesicular body protein 5 | chromatin modifying protein 5, isoform CRA_b | Chromatin modifying protein 5 | charged multivesicular body protein 5 isoform 1	.	.	.	.	.
ENSOARG00000011088	ENSOARP00000011883	1	ENSOARG00000000424	FAM136A	family with sequence similarity 136 member A	1	.	XP_011978882.1 (Ovis aries musimon: 100.0% identity in aln 92.7% length of target) | XP_005904362.1 (Bos mutus: 98.6% identity in aln 98.6% length of target) | NP_001040053.1 (Bos taurus: 100.0% identity in aln 100.0% length of target) | XP_010828104.1 (Bison bison bison: 99.3% identity in aln 92.7% length of target)	31	6	19.4	41	4	93.5	protein FAM136A	protein FAM136A-like	2	-2,0	ENSOARG00000011190/ENSBTAG00000005400	AIM1,RTN4IP1,QRSL1	ENSOARG00000011081/ENSBTAG00000026633
ENSOARG00000011094	ENSOARP00000011887	0	.	QRSL1	glutaminyl-tRNA synthase (glutamine-hydrolyzing)-like 1	1	.	XP_012004903.1 (Ovis aries musimon: 98.9% identity in aln 99.8% length of target) | XP_005684666.1 (Capra hircus: 98.1% identity in aln 99.8% length of target) | XP_005898260.1 (Bos mutus: 97.5% identity in aln 99.8% length of target) | NP_001039801.1 (Bos taurus: 97.0% identity in aln 99.8% length of target) | XP_006076472.1 (Bubalus bubalis: 96.8% identity in aln 99.8% length of target) | XP_00…	44	9	20.5	34	7	88.6	glutamyl-tRNA(Gln) amidotransferase subunit A, mitochondrial	Glutamyl-tRNA(Gln) amidotransferase subunit A-like protein | Glutamyl-tRNA(Gln) amidotransferase subunit A like protein | glutamyl-tRNA(Gln) amidotransferase subunit A, mitochondrial isoform 1	5	-5,0	.	COL15A1,GALNT12,ANKS6,GABBR2,TBC1D2,CORO2A	ENSOARG00000011131/TRIM14
ENSOARG00000011118	ENSOARP00000011919	0	.	CORO2A	coronin 2A	1	.	XP_013821510.1 (Capra hircus: 98.7% identity in aln 100.0% length of target) | NP_001033309.1 (Bos taurus: 98.3% identity in aln 100.0% length of target) | XP_006063509.1 (Bubalus bubalis: 98.3% identity in aln 100.0% length of target) | XP_006187836.1 (Camelus ferus: 90.5% identity in aln 100.0% length of target) | XP_006204123.1 (Vicugna pacos: 90.7% identity in aln 100.0% length of target) | X…	13	8	61.5	10	7	100	coronin-2A	.	1	0,+1	.	DNAJC14,ORMDL2	.
ENSOARG00000011120	ENSOARP00000011922	0	.	DNAJC14	DnaJ heat shock protein family (Hsp40) member C14	1	.	XP_005680447.1 (Capra hircus: 98.9% identity in aln 100.0% length of target) | XP_005905934.1 (Bos mutus: 98.0% identity in aln 100.0% length of target) | NP_776699.1 (Bos taurus: 97.9% identity in aln 100.0% length of target) | XP_006075140.1 (Bubalus bubalis: 97.9% identity in aln 100.0% length of target) | XP_010837484.1 (Bison bison bison: 98.1% identity in aln 100.0% length of target)	6	6	100	4	5	100	dnaJ homolog subfamily C member 14	.	.	.	.	.	.
ENSOARG00000011128	ENSOARP00000011930	0	.	CBS	cystathionine-beta-synthase	1	.	XP_011991239.1 (Ovis aries musimon: 99.316% identity in aln 100.0% length of target)XP_011991239.1 (Ovis aries musimon: 99.3% identity in aln 100.0% length of target) | XP_014337595.1 (Bos mutus: 97.4% identity in aln 100.0% length of target) | XP_010799956.1 (Bos taurus: 97.7% identity in aln 94.3% length of target)	4	4	100	1	2	100	cystathionine beta-synthase	.	.	.	.	.	.
ENSOARG00000011154	ENSOARP00000011957	0	.	ANP32B	acidic nuclear phosphoprotein 32 family member B	1	.	XP_014962320.1 (Ovis aries musimon: 93.9% identity in aln 100.0% length of target) | XP_005906040.1 (Bos mutus: 95.0% identity in aln 100.0% length of target) | NP_001030246.1 (Bos taurus: 95.0% identity in aln 100.0% length of target) | XP_006187838.2 (Camelus ferus: 95.6% identity in aln 96.9% length of target) | XP_006204125.1 (Vicugna pacos: 92.3% identity in aln 100.0% length of target)	15	7	46.7	12	5	86.7	acidic leucine-rich nuclear phosphoprotein 32 family member B	acidic leucine-rich nuclear phosphoprotein 32 family member B-like | Acidic leucine-rich nuclear phosphoprotein 32 family member B	0	0	ENSOARG00000020136/ENSBTAG00000030337	.	.
ENSOARG00000011164	ENSOARP00000011967	0	.	RRAGC	Ras related GTP binding C	8	.	.	0	0	0	0	0	0	.	.	1	0,+1	ENSOARG00000011103/ENSBTAG00000006785	CRHR1,SPPL2C	.
ENSOARG00000011170	ENSOARP00000011973	0	.	CRHR1	corticotropin-releasing factor receptor 1	8	.	.	0	0	0	0	0	0	.	.	.	.	.	.	.
ENSOARG00000011194	ENSOARP00000011993	2	ENSOARG00000011028, ENSOARG00000016890	OR140	OR140	1	.	XP_012028345.1 (Ovis aries musimon: 97.1% identity in aln 100.0% length of target) | XP_005690286.1 (Capra hircus: 98.7% identity in aln 100.0% length of target) | XP_005903662.1 (Bos mutus: 92.9% identity in aln 100.0% length of target) | XP_002693653.1 (Bos taurus: 94.8% identity in aln 100.0% length of target) | XP_006047654.1 (Bubalus bubalis: 94.5% identity in aln 100.0% length of target) | …	8	8	100	5	6	100	olfactory receptor 140	.	.	.	.	.	.
ENSOARG00000011199	ENSOARP00000012000	0	.	ATG5	autophagy related 5	1	.	NP_001029751.2 (Bos taurus: 100.0% identity in aln 100.0% length of target) | XP_006205681.1 (Vicugna pacos: 99.3% identity in aln 100.0% length of target)	74	2	2.7	83	2	87.8	autophagy protein 5	autophagy protein 5 isoform 1 | autophagy related 5-like protein | Chain A, Structure Of Human Atg5 E122d-atg16l1 Complex At 3.0 Angstroms | autophagy protein 5-like | RecName: Full=Autophagy protein 5 | autophagy-related 5 (yeast) | autophagy protein 5 isoform a | Chain A, Crystal Structure Of Human Atg5-atg16n69	0	0	.	.	.
ENSOARG00000011215	ENSOARP00000012020	0	.	HTATSF1	HIV-1 Tat specific factor 1	1	.	XP_005700479.1 (Capra hircus: 99.1% identity in aln 100.0% length of target) | XP_005907960.1 (Bos mutus: 98.6% identity in aln 99.7% length of target) | NP_001193343.1 (Bos taurus: 98.8% identity in aln 99.7% length of target) | XP_006049535.1 (Bubalus bubalis: 98.1% identity in aln 100.0% length of target) | XP_005968666.1 (Pantholops hodgsonii: 99.1% identity in aln 100.0% length of target)	6	6	100	4	5	100	HIV Tat-specific factor 1	.	.	.	.	.	.
ENSOARG00000011241	ENSOARP00000012041	0	.	FFAR3	free fatty acid receptor 3	1	.	NP_001272582.1 (Capra hircus: 100.0% identity in aln 100.0% length of target) | XP_005908248.1 (Bos mutus: 97.5% identity in aln 100.0% length of target) | NP_001138705.1 (Bos taurus: 97.2% identity in aln 100.0% length of target) | XP_005958247.1 (Pantholops hodgsonii: 98.8% identity in aln 100.0% length of target)	9	9	100	5	4	100	free fatty acid receptor 3	.	.	.	.	.	.
ENSOARG00000011275	ENSOARP00000012081	3	ENSOARG00000004858, ENSOARG00000009669, ENSOARG00000019770	HMGN1	high mobility group nucleosome binding domain 1	1	.	XP_012026324.1 (Ovis aries musimon: 99.0% identity in aln 100.0% length of target) | XP_005678075.1 (Capra hircus: 98.0% identity in aln 92.5% length of target) | NP_001029944.1 (Bos taurus: 100.0% identity in aln 100.0% length of target) | XP_006069431.1 (Bubalus bubalis: 98.0% identity in aln 100.0% length of target) | XP_005971462.1 (Pantholops hodgsonii: 94.1% identity in aln 99.0% length of …	52	10	19.2	41	8	100	non-histone chromosomal protein HMG-14	.	2	-1,+1	.	GDF11,CD63,RDH5	.
ENSOARG00000011313	ENSOARP00000012124	0	.	CD63	CD63 antigen	1	.	XP_011986585.1 (Ovis aries musimon: 99.6% identity in aln 100.0% length of target) | XP_005680452.1 (Capra hircus: 100.0% identity in aln 100.0% length of target) | XP_005905938.1 (Bos mutus: 92.8% identity in aln 100.0% length of target) | NP_991372.1 (Bos taurus: 92.4% identity in aln 100.0% length of target) | XP_006075148.1 (Bubalus bubalis: 94.5% identity in aln 100.0% length of target) | XP…	10	8	80	5	6	90	CD63 antigen	RecName: Full=CD63 antigen; AltName: CD_antigen=CD63	.	.	.	.	.
ENSOARG00000011341	ENSOARP00000012156	0	.	TEX261	testis expressed 261	1	NP_653183.2 (97.4% identity in aln 100.0% length of target)	XP_005212582.1 (Bos taurus: 98.5% identity in aln 100.0% length of target)	53	1	1.9	72	1	98.1	protein TEX261	Protein TEX261	2	-2,0	ENSOARG00000011235/ENSBTAG00000011437	HSF2BP,RRP1B,PDXK	.
ENSOARG00000011345	ENSOARP00000012160	0	.	PDXK	pyridoxal (pyridoxine, vitamin B6) kinase	1	.	XP_013822285.1 (Capra hircus: 99.3% identity in aln 91.3% length of target) | NP_001069119.1 (Bos taurus: 98.6% identity in aln 91.3% length of target) | XP_006060829.1 (Bubalus bubalis: 99.3% identity in aln 91.3% length of target) | XP_010833206.1 (Bison bison bison: 98.6% identity in aln 99.6% length of target)	16	7	43.8	11	5	93.8	pyridoxal kinase	Pyridoxal kinase	.	.	.	.	.
ENSOARG00000011377	ENSOARP00000012193	0	.	CSTB	cystatin B	6	.	XP_011991253.1 (Ovis aries musimon: 93.750% identity in aln 95.0% length of target)	6	4	66.7	3	4	33.3	stefin-C	.	0	0	ENSOARG00000011419/ENSBTAG00000036321	.	ENSOARG00000011338/ENSBTAG00000019977
ENSOARG00000011390	ENSOARP00000012203	1	.	PRAME	PRAME	1	.	XP_012025247.2 (Ovis aries musimon: 99.8% identity in aln 99.4% length of target) | XP_002694129.3 (Bos taurus: 93.0% identity in aln 99.4% length of target) | XP_006074524.1 (Bubalus bubalis: 92.8% identity in aln 99.4% length of target) | XP_005966406.1 (Pantholops hodgsonii: 97.7% identity in aln 99.4% length of target)	5	5	100	4	5	100	melanoma antigen preferentially expressed in tumors	.	.	.	.	.	.
ENSOARG00000011405	ENSOARP00000012223	0	.	CSTB	cystatin B	1	.	XP_011991252.1 (Ovis aries musimon: 92.8% identity in aln 99.0% length of target) | XP_005907641.1 (Bos mutus: 91.8% identity in aln 99.0% length of target) | NP_001032538.1 (Bos taurus: 90.7% identity in aln 99.0% length of target) | XP_006060831.1 (Bubalus bubalis: 90.7% identity in aln 99.0% length of target)	7	6	85.7	4	5	85.7	cystatin-B	Cystatin-B	.	.	.	.	.
ENSOARG00000011429	ENSOARP00000012252	0	.	BLOC1S3	biogenesis of lysosomal organelles complex 1 subunit 3	1	.	XP_011983572.1 (Ovis aries musimon: 99.5% identity in aln 100.0% length of target) | XP_013826953.1 (Capra hircus: 99.0% identity in aln 100.0% length of target)	16	2	12.5	17	2	100	biogenesis of lysosome-related organelles complex 1 subunit 3	.	.	.	.	.	.
ENSOARG00000011430	ENSOARP00000012251	0	.	TOMM5	translocase of outer mitochondrial membrane 5	5	.	.	11	0	0	65	0	81.8	mitochondrial import receptor subunit TOM5 homolog	mitochondrial import receptor subunit TOM5 homolog isoform 1	.	.	.	.	.
ENSOARG00000011471	ENSOARP00000012297	2	ENSOARG00000011609, ENSOARG00000011765	OR8K3	olfactory receptor family 8 subfamily K member 3 (gene/pseudogene)	1	.	XP_012023192.1 (Ovis aries musimon: 98.7% identity in aln 100.0% length of target) | XP_005690322.1 (Capra hircus: 97.4% identity in aln 100.0% length of target) | XP_005897074.1 (Bos mutus: 92.0% identity in aln 100.0% length of target) | XP_010828789.1 (Bison bison bison: 93.9% identity in aln 100.0% length of target) | XP_005961047.1 (Pantholops hodgsonii: 96.2% identity in aln 100.0% length o…	7	5	71.4	4	5	100	olfactory receptor 8K3	.	0	0	.	.	.
ENSOARG00000011480	ENSOARP00000012306	1	.	VN1R4	VN1R4	1	.	XP_005895475.1 (Bos mutus: 93.7% identity in aln 100.0% length of target) | XP_006067646.1 (Bubalus bubalis: 94.0% identity in aln 100.0% length of target) | XP_010847993.1 (Bison bison bison: 94.0% identity in aln 100.0% length of target)	5	4	80	4	4	80	vomeronasal type-1 receptor 4	vomeronasal type-1 receptor 3-like	3	-2,+1	ENSOARG00000011896/ENSBTAG00000046148	RFLNB,VPS53,FAM57A,GEMIN4	.
ENSOARG00000011520	ENSOARP00000012345	0	.	FAM57A	family with sequence similarity 57 member A	1	.	NP_001074985.1 (Bos taurus: 98.5% identity in aln 100.0% length of target) | XP_006052775.1 (Bubalus bubalis: 95.7% identity in aln 100.0% length of target)	6	3	50	7	3	100	protein FAM57A	.	.	.	.	.	.
ENSOARG00000011538	ENSOARP00000012369	0	.	VPS33A	VPS33A, CORVET/HOPS core subunit	1	NP_075067.2 (98.0% identity in aln 100.0% length of target)	XP_005691458.1 (Capra hircus: 99.8% identity in aln 100.0% length of target) | XP_005904757.1 (Bos mutus: 99.5% identity in aln 100.0% length of target) | NP_001039514.1 (Bos taurus: 99.3% identity in aln 100.0% length of target) | XP_010839631.1 (Bison bison bison: 99.3% identity in aln 100.0% length of target) | XP_006178101.2 (Camelus ferus: 99.3% identity in aln 97.2% length of target) | XP_0…	67	7	10.4	63	6	94	vacuolar protein sorting-associated protein 33A	VPS33A | Chain A, Human Vps33a | hCG2045883 | Chain A, Human Vps33a In Complex With A Fragment Of Human Vps16	4	-3,+1	ENSOARG00000010991/GINS2	EMC8,COX4I1,IRF8,FOXF1,MTHFSD	ENSOARG00000011615/FOXC2
ENSOARG00000011547	ENSOARP00000012376	0	.	FOXF1	forkhead box F1	1	.	XP_013826434.1 (Capra hircus: 99.5% identity in aln 91.6% length of target)	49	7	14.3	46	7	93.9	forkhead box protein F1	Forkhead-related transcription factor 1 | FREAC-1	3	-3,0	ENSOARG00000011291/BRS3	MAP7D3,FHL1,SLC9A6,MMGT1	ENSOARG00000011598/ENSBTAG00000047290
ENSOARG00000011561	ENSOARP00000012391	0	.	MMGT1	membrane magnesium transporter 1	1	.	XP_005904113.1 (Bos mutus: 99.4% identity in aln 100.0% length of target) | XP_006056314.1 (Bubalus bubalis: 99.4% identity in aln 100.0% length of target) | XP_005968671.1 (Pantholops hodgsonii: 100.0% identity in aln 99.4% length of target)	6	6	100	4	5	83.3	membrane magnesium transporter 1	membrane magnesium transporter 1 precursor	1	-1,0	ENSOARG00000011472/RRP1	AGPAT3,TRAPPC10	.
ENSOARG00000011590	ENSOARP00000012437	0	.	TRAPPC10	trafficking protein particle complex 10	1	.	XP_005907645.2 (Bos mutus: 98.0% identity in aln 99.8% length of target) | XP_006060836.1 (Bubalus bubalis: 98.5% identity in aln 100.0% length of target) | XP_010833201.1 (Bison bison bison: 98.4% identity in aln 99.5% length of target) | XP_015095303.1 (Vicugna pacos: 90.1% identity in aln 100.0% length of target) | XP_005956877.1 (Pantholops hodgsonii: 99.1% identity in aln 98.0% length of tar…	14	6	42.9	11	5	100	trafficking protein particle complex subunit 10	.	.	.	.	.	.
ENSOARG00000011591	ENSOARP00000012424	1	ENSOARG00000019898	VN1R2	vomeronasal 1 receptor 2	1	.	XP_014961733.1 (Ovis aries musimon: 99.7% identity in aln 100.0% length of target) | XP_005895460.1 (Bos mutus: 94.8% identity in aln 100.0% length of target) | XP_006067474.1 (Bubalus bubalis: 95.5% identity in aln 100.0% length of target) | XP_010847847.1 (Bison bison bison: 94.2% identity in aln 100.0% length of target) | XP_005955395.1 (Pantholops hodgsonii: 96.8% identity in aln 100.0% lengt…	5	5	100	4	5	100	vomeronasal type-1 receptor 2-like	.	.	.	.	.	.
ENSOARG00000011605	ENSOARP00000012441	0	.	RPL9	ribosomal protein L9	6	.	NP_001019640.2 (Bos taurus: 100.000% identity in aln 100.0% length of target)	131	13	9.9	148	5	72.5	60S ribosomal protein L9	.	.	.	.	.	.
ENSOARG00000011609	ENSOARP00000012442	2	ENSOARG00000011471, ENSOARG00000011765	OR8K3	olfactory receptor family 8 subfamily K member 3 (gene/pseudogene)	1	.	XP_012023168.1 (Ovis aries musimon: 99.042% identity in aln 100.0% length of target)XP_012023168.1 (Ovis aries musimon: 99.0% identity in aln 100.0% length of target) | XP_005690303.2 (Capra hircus: 97.4% identity in aln 100.0% length of target) | XP_014332248.1 (Bos mutus: 97.4% identity in aln 100.0% length of target)	4	3	75	2	3	100	olfactory receptor 8K3	.	0	0	.	.	.
ENSOARG00000011629	ENSOARP00000012464	1	ENSOARG00000010592	RPS10	ribosomal protein S10	1	NP_001005.1 (96.4% identity in aln 100.0% length of target)	XP_005983527.1 (Pantholops hodgsonii: 92.7% identity in aln 100.0% length of target)	60	3	5	92	3	91.7	40S ribosomal protein S10	Diphosphoinositol polyphosphate phosphohydrolase 1 | ribosomal protein S10, isoform CRA_b | RPS10-NUDT3 protein | mCG129780 | mCG16751	0	0	.	.	.
ENSOARG00000011641	ENSOARP00000012476	1	ENSOARG00000008509	LSM6	LSM6 homolog, U6 small nuclear RNA and mRNA degradation associated	1	NP_009011.1 (93.7% identity in aln 98.8% length of target)	XP_005911376.1 (Bos mutus: 91.1% identity in aln 98.8% length of target)	36	1	2.8	153	1	94.4	U6 snRNA-associated Sm-like protein LSm6	U6 snRNA-associated Sm-like protein LSm6 isoform 1 | small nuclear ribonucleoprotein F	2	-1,+1	.	SPR,EMX1,SFXN5	ENSOARG00000011678/ENSBTAG00000006162
ENSOARG00000011643	ENSOARP00000012478	0	.	EMX1	empty spiracles homeobox 1	3	NP_004088.2 (99.4% identity in aln 57.2% length of target)	XP_011978947.1 (Ovis aries musimon: 100.0% identity in aln 57.6% length of target) | NP_001179152.1 (Bos taurus: 100.0% identity in aln 57.6% length of target) | XP_006045975.1 (Bubalus bubalis: 100.0% identity in aln 57.6% length of target)	67	4	6	63	3	92.5	homeobox protein EMX1	Homeobox protein EMX1 | homeobox protein EMX1-like protein | homeobox protein EMX2 | EMX1 | RecName: Full=Homeobox protein EMX1; AltName: Full=Empty spiracles homolog 1; AltName: Full=Empty spiracles-like protein 1	.	.	.	.	.
ENSOARG00000011664	ENSOARP00000012499	1	ENSOARG00000021176	SENP8	SUMO/sentrin peptidase family member, NEDD8 specific	1	NP_660205.3 (90.5% identity in aln 99.5% length of target)	XP_011984463.1 (Ovis aries musimon: 99.5% identity in aln 99.5% length of target) | XP_005685230.1 (Capra hircus: 99.1% identity in aln 99.5% length of target) | XP_005892239.1 (Bos mutus: 95.7% identity in aln 99.5% length of target) | XP_002692753.1 (Bos taurus: 96.2% identity in aln 95.9% length of target) | XP_006056976.1 (Bubalus bubalis: 97.2% identity in aln 99.5% length of target) | XP_00…	57	10	17.5	45	7	89.5	sentrin-specific protease 8	sentrin-specific protease 8-like | SUMO/sentrin specific peptidase family member 8 | Chain A, Nedd8 Protease | cysteine protease FKSG8 | SUMO/sentrin specific protease family member 8-like protein	.	.	.	.	.
ENSOARG00000011672	ENSOARP00000012517	0	.	PWP2	periodic tryptophan protein 2 homolog	8	.	.	0	0	0	0	0	0	.	.	9	-3,+6	ENSOARG00000010983/ENSBTAG00000007010	TEX36,EDRF1,UROS,BCCIP,DHX32,FANK1,ADAM12,C10orf90,FAM196A,DOCK1	.
ENSOARG00000011677	ENSOARP00000012513	0	.	BCCIP	BRCA2 and CDKN1A-interacting protein	8	.	.	0	0	0	0	0	0	.	.	0	0	.	.	.
ENSOARG00000011693	ENSOARP00000012532	1	ENSOARG00000000161	CAPZA2	capping actin protein of muscle Z-line alpha subunit 2	1	NP_006127.1 (95.5% identity in aln 100.0% length of target)	NP_001013016.1 (Bos taurus: 96.9% identity in aln 100.0% length of target) | XP_015096329.1 (Vicugna pacos: 96.7% identity in aln 99.6% length of target) | XP_005959441.1 (Pantholops hodgsonii: 96.3% identity in aln 92.6% length of target)	144	7	4.9	139	6	99.3	capping actin protein of muscle Z-line alpha subunit 2	capping protein (actin filament) muscle Z-line, alpha 2, isoform CRA_a	.	.	.	.	.
ENSOARG00000011701	ENSOARP00000012541	0	.	TMEM8B	transmembrane protein 8B	1	.	XP_005683913.2 (Capra hircus: 99.7% identity in aln 95.9% length of target) | XP_005210113.1 (Bos taurus: 98.0% identity in aln 95.9% length of target)	11	3	27.3	10	3	100	transmembrane protein 8B	.	.	.	.	.	.
ENSOARG00000011711	ENSOARP00000012554	0	.	LOC102724023	LOC102724023	1	.	XP_013822333.1 (Capra hircus: 98.175% identity in aln 93.2% length of target)XP_013822333.1 (Capra hircus: 98.2% identity in aln 93.2% length of target) | XP_005907646.1 (Bos mutus: 97.1% identity in aln 100.0% length of target) | NP_001029635.1 (Bos taurus: 97.1% identity in aln 100.0% length of target) | XP_006060840.1 (Bubalus bubalis: 97.4% identity in aln 100.0% length of target)	4	4	100	3	3	100	ES1 protein homolog, mitochondrial	.	.	.	.	.	.
ENSOARG00000011738	ENSOARP00000012580	0	.	ICOSLG	inducible T-cell costimulator ligand	1	.	XP_010833196.1 (Bison bison bison: 92.4% identity in aln 90.7% length of target) | XP_005956864.1 (Pantholops hodgsonii: 96.7% identity in aln 100.0% length of target)	8	5	62.5	4	5	100	ICOS ligand	.	5	-1,+4	.	DAZAP1,RPS15,APC2,C19orf25,PCSK4,REEP6	.
ENSOARG00000011763	ENSOARP00000012606	0	.	RPS15	40S ribosomal protein S15	8	.	.	0	0	0	0	0	0	.	.	.	.	.	.	.
ENSOARG00000011765	ENSOARP00000012605	2	ENSOARG00000011471, ENSOARG00000011609	OR8K3	olfactory receptor family 8 subfamily K member 3 (gene/pseudogene)	1	.	XP_012023194.1 (Ovis aries musimon: 98.403% identity in aln 100.0% length of target)XP_012023194.1 (Ovis aries musimon: 98.4% identity in aln 100.0% length of target) | XP_005690324.1 (Capra hircus: 96.5% identity in aln 100.0% length of target) | XP_005906346.1 (Bos mutus: 94.9% identity in aln 100.0% length of target) | XP_010830914.1 (Bison bison bison: 93.9% identity in aln 100.0% length of t…	7	5	71.4	3	4	100	olfactory receptor 8K3	.	.	.	.	.	.
ENSOARG00000011773	ENSOARP00000012622	0	.	DNMT3L	DNA (cytosine-5)-methyltransferase 3-like	8	.	.	0	0	0	0	0	0	.	.	.	.	.	.	.
ENSOARG00000011781	ENSOARP00000012621	0	.	OR49	OR49	1	.	XP_014945979.1 (Ovis aries musimon: 98.4% identity in aln 99.4% length of target) | XP_005685410.1 (Capra hircus: 95.0% identity in aln 99.4% length of target) | XP_005895531.1 (Bos mutus: 90.5% identity in aln 98.7% length of target) | XP_010807350.1 (Bos taurus: 95.3% identity in aln 99.4% length of target) | XP_006066621.1 (Bubalus bubalis: 93.2% identity in aln 99.4% length of target) | XP_01…	18	16	88.9	5	6	100	olfactory receptor 49	.	3	-1,+2	ENSOARG00000011982/SIRT4	PXN,RPLP0,GCN1,RAB35	ENSOARG00000010963/BICDL1
ENSOARG00000011805	ENSOARP00000012652	0	.	RPLP0	ribosomal protein lateral stalk subunit P0	2	NP_000993.1 (99.6% identity in aln 89.6% length of target)	NP_001012700.1 (Bos taurus: 99.6% identity in aln 89.6% length of target) | XP_006053033.1 (Bubalus bubalis: 99.3% identity in aln 89.6% length of target) | XP_006192755.1 (Camelus ferus: 98.9% identity in aln 87.6% length of target) | XP_005962035.1 (Pantholops hodgsonii: 98.9% identity in aln 89.6% length of target)	74	4	5.4	77	4	89.2	60S acidic ribosomal protein P0	Ribosomal protein, large, P0 | ribosomal protein P0 variant | 60S acidic ribosomal protein P0-like | large ribosomal protein P0 | RecName: Full=60S acidic ribosomal protein P0-like	.	.	.	.	.
ENSOARG00000011806	ENSOARP00000012655	0	.	TSTD3	thiosulfate sulfurtransferase (rhodanese)-like domain containing 3	1	.	XP_005684706.1 (Capra hircus: 98.1% identity in aln 100.0% length of target) | XP_005902671.1 (Bos mutus: 93.1% identity in aln 100.0% length of target) | NP_001103564.1 (Bos taurus: 92.5% identity in aln 100.0% length of target) | XP_010833045.1 (Bison bison bison: 93.7% identity in aln 100.0% length of target) | XP_005980069.1 (Pantholops hodgsonii: 99.4% identity in aln 100.0% length of target)	7	7	100	4	5	100	thiosulfate sulfurtransferase/rhodanese-like domain-containing protein 3	.	.	.	.	.	.
ENSOARG00000011815	ENSOARP00000012665	0	.	C1QTNF3	C1q and tumor necrosis factor related protein 3	1	.	XP_013828292.1 (Capra hircus: 99.7% identity in aln 100.0% length of target) | XP_005221661.1 (Bos taurus: 99.1% identity in aln 100.0% length of target) | XP_006194873.1 (Camelus ferus: 96.2% identity in aln 100.0% length of target) | XP_006199713.1 (Vicugna pacos: 96.6% identity in aln 100.0% length of target) | XP_005983069.1 (Pantholops hodgsonii: 99.1% identity in aln 100.0% length of target)	77	6	7.8	70	6	88.3	complement C1q tumor necrosis factor-related protein 3	Complement C1q tumor necrosis factor-related protein 3 | complement C1q tumor necrosis factor-related protein 3 precursor | complement C1q tumor necrosis factor-related protein 3 isoform b precursor | complement C1q tumor necrosis factor-related protein 3 isoform 1 | complement C1q tumor necrosis factor-related protein 3 isoform 1 precursor | C1q and tumor necrosis factor related protein 3, isofo…	5	0,+5	ENSOARG00000011877/ENSBTAG00000047771	PTPRG,C3orf14,FEZF2,CADPS,SYNPR,SNTN	ENSOARG00000011488/C3orf49
ENSOARG00000011822	ENSOARP00000012671	0	.	PTPRG	protein tyrosine phosphatase, receptor type G	4	.	.	101	4	4	87	4	93.1	receptor-type tyrosine-protein phosphatase gamma	receptor-type tyrosine-protein phosphatase gamma-like | receptor-type tyrosine-protein phosphatase gamma isoform 2 | receptor-type tyrosine-protein phosphatase gamma-like protein | PTPRG protein | receptor-type tyrosine-protein phosphatase gamma precursor	.	.	.	.	.
ENSOARG00000011849	ENSOARP00000012705	0	.	COL19A1	collagen type XIX alpha 1 chain	8	.	.	0	0	0	0	0	0	.	.	11	-3,+8	ENSOARG00000012735/ENSBTAG00000025202	ATAD5,TEFM,ADAP2,RNF135,RHOT1,RHBDL3,C17orf75,ZNF207,PSMD11,CDK5R1,MYO1D,TMEM98	.
ENSOARG00000011908	ENSOARP00000012766	0	.	RNF135	ring finger protein 135	2	.	XP_005983196.1 (Pantholops hodgsonii: 97.9% identity in aln 76.9% length of target)	13	12	92.3	5	6	100	E3 ubiquitin-protein ligase RNF135	.	.	.	.	.	.
ENSOARG00000011912	ENSOARP00000012771	2	ENSOARG00000012041, ENSOARG00000012058	OR8J3	olfactory receptor family 8 subfamily J member 3	1	.	XP_012023200.1 (Ovis aries musimon: 91.5% identity in aln 98.7% length of target) | XP_005690306.1 (Capra hircus: 97.1% identity in aln 99.7% length of target) | XP_002693726.1 (Bos taurus: 92.2% identity in aln 99.4% length of target) | XP_010831669.1 (Bison bison bison: 91.5% identity in aln 99.4% length of target) | XP_005979694.1 (Pantholops hodgsonii: 96.4% identity in aln 99.7% length of ta…	8	8	100	4	5	87.5	olfactory receptor 8J3	olfactory receptor 8J1	.	.	.	.	.
ENSOARG00000011920	ENSOARP00000012778	1	ENSOARG00000009047	STEAP1	STEAP family member 1	1	NP_036581.1 (90.9% identity in aln 100.0% length of target)	XP_005679361.1 (Capra hircus: 98.5% identity in aln 100.0% length of target) | NP_001192735.1 (Bos taurus: 97.9% identity in aln 100.0% length of target) | XP_006075297.1 (Bubalus bubalis: 98.5% identity in aln 100.0% length of target) | XP_006193855.1 (Camelus ferus: 92.9% identity in aln 100.0% length of target) | XP_006211919.1 (Vicugna pacos: 93.2% identity in aln 100.0% length of target) | X…	32	7	21.9	30	7	84.4	metalloreductase STEAP1	metalloreductase STEAP1-like | six transmembrane epithelial antigen of the prostate 1 (predicted) | similar to Six transmembrane epithelial antigen of prostate | six transmembrane epithelial antigen of the prostate	.	.	.	.	.
ENSOARG00000011924	ENSOARP00000012784	0	.	COL19A1	collagen type XIX alpha 1 chain	1	.	XP_012020286.1 (Ovis aries musimon: 98.997% identity in aln 90.9% length of target)XP_012020286.1 (Ovis aries musimon: 99.0% identity in aln 90.9% length of target)	1	1	100	0	1	100	collagen alpha-1(XIX) chain	.	.	.	.	.	.
ENSOARG00000011994	ENSOARP00000012856	0	.	NEURL4	neuralized-like protein 4	8	.	.	0	0	0	0	0	0	.	.	12	-10,+2	.	F5,SELP,SELL,SELE,METTL18,C1orf112,SCYL3,KIFAP3,METTL11B,GORAB,PRRX1,MROH9,FMO3	ENSOARG00000012370/ENSBTAG00000047256
ENSOARG00000012029	ENSOARP00000012896	0	.	PRRX1	paired related homeobox 1	1	.	XP_010835018.1 (Bison bison bison: 95.2% identity in aln 96.7% length of target)	26	2	7.7	70	2	80.8	paired mesoderm homeobox protein 1	homeobox protein | paired mesoderm homeobox protein 1 isoform b | paired related homeobox 1, isoform CRA_b | paired mesoderm homeobox protein 1 isoform 1 | paired mesoderm homeobox protein 1 isoform pmx-1a	.	.	.	.	.
ENSOARG00000012030	ENSOARP00000012897	2	ENSOARG00000001623, ENSOARG00000012116	MOGAT2	monoacylglycerol O-acyltransferase 2	1	.	XP_012028205.2 (Ovis aries musimon: 97.305% identity in aln 100.0% length of target)XP_012028205.2 (Ovis aries musimon: 97.3% identity in aln 100.0% length of target) | XP_005982607.1 (Pantholops hodgsonii: 91.9% identity in aln 100.0% length of target)	2	2	100	1	2	100	2-acylglycerol O-acyltransferase 2	.	0	0	.	.	.
ENSOARG00000012037	ENSOARP00000012903	0	.	CORO2A	coronin 2A	8	.	.	0	0	0	0	0	0	.	.	.	.	.	.	.
ENSOARG00000012041	ENSOARP00000012908	2	ENSOARG00000011912, ENSOARG00000012058	OR8J3	olfactory receptor family 8 subfamily J member 3	1	.	XP_004016834.1 (Ovis aries: 100.000% identity in aln 100.0% length of target)XP_012023200.1 (Ovis aries musimon: 91.3% identity in aln 99.7% length of target) | XP_005690307.1 (Capra hircus: 97.8% identity in aln 100.0% length of target) | XP_014338787.1 (Bos mutus: 96.4% identity in aln 100.0% length of target) | XP_002693710.1 (Bos taurus: 97.1% identity in aln 100.0% length of target)	6	6	100	2	3	100	olfactory receptor 8J3	.	.	.	.	.	.
ENSOARG00000012049	ENSOARP00000012912	1	ENSOARG00000007952	OR2L2	olfactory receptor family 2 subfamily L member 2	1	.	XP_012024547.1 (Ovis aries musimon: 98.7% identity in aln 98.1% length of target) | XP_005682915.1 (Capra hircus: 96.5% identity in aln 98.1% length of target) | XP_010826984.1 (Bison bison bison: 97.1% identity in aln 98.1% length of target)	5	4	80	4	4	80	olfactory receptor 2L2	olfactory receptor 2L8-like	5	-2,+3	ENSOARG00000019980/ENSBTAG00000017170	MMS22L,KLHL32,NDUFAF4,GPR63,FHL5,UFL1	.
ENSOARG00000012056	ENSOARP00000012922	0	.	NDUFAF4	NADH:ubiquinone oxidoreductase complex assembly factor 4	1	.	XP_005684718.1 (Capra hircus: 97.7% identity in aln 100.0% length of target) | XP_005892321.1 (Bos mutus: 94.3% identity in aln 100.0% length of target) | NP_001076985.1 (Bos taurus: 95.4% identity in aln 100.0% length of target) | XP_006077505.1 (Bubalus bubalis: 95.4% identity in aln 100.0% length of target) | XP_005980081.1 (Pantholops hodgsonii: 97.7% identity in aln 100.0% length of target)	9	6	66.7	8	5	77.8	NADH dehydrogenase [ubiquinone] 1 alpha subcomplex assembly factor 4	NADH dehydrogenase [ubiquinone] 1 alpha subcomplex assembly factor 4-like	.	.	.	.	.
ENSOARG00000012058	ENSOARP00000012925	2	ENSOARG00000011912, ENSOARG00000012041	OR8J3	olfactory receptor family 8 subfamily J member 3	1	.	XP_005690308.1 (Capra hircus: 97.4% identity in aln 98.7% length of target) | XP_005908447.1 (Bos mutus: 94.9% identity in aln 98.1% length of target) | XP_006080838.1 (Bubalus bubalis: 93.2% identity in aln 98.1% length of target) | XP_010845214.1 (Bison bison bison: 94.5% identity in aln 98.1% length of target) | XP_005979693.1 (Pantholops hodgsonii: 92.9% identity in aln 98.7% length of target)	6	5	83.3	5	5	100	olfactory receptor 8J3	.	.	.	.	.	.
ENSOARG00000012081	ENSOARP00000012948	0	.	OR4E1	olfactory receptor family 4 subfamily E member 1 (gene/pseudogene)	1	.	XP_005685411.1 (Capra hircus: 97.8% identity in aln 99.7% length of target) | XP_010844548.1 (Bison bison bison: 96.2% identity in aln 99.7% length of target) | XP_006190925.1 (Camelus ferus: 90.4% identity in aln 99.7% length of target) | XP_006218788.1 (Vicugna pacos: 90.4% identity in aln 99.7% length of target)	32	5	15.6	28	5	93.8	olfactory receptor 4E1	olfactory receptor 4E1-like	.	.	.	.	.
ENSOARG00000012084	ENSOARP00000012952	0	.	NACA	nascent polypeptide-associated complex subunit alpha	7	.	.	110	8	7.3	133	3	64.5	nascent polypeptide-associated complex subunit alpha	.	0	0	ENSOARG00000012107/ENSBTAG00000005099	.	ENSOARG00000012024/PTGER3
ENSOARG00000012093	ENSOARP00000012965	0	.	ZRANB2	zinc finger RANBP2-type containing 2	1	.	XP_005204511.1 (Bos taurus: 99.7% identity in aln 100.0% length of target)	52	2	3.8	52	1	84.6	zinc finger Ran-binding domain-containing protein 2	zinc finger protein 265 isoform 1 variant | zinc finger Ran-binding domain-containing protein 2-like | zinc finger protein 265, isoform CRA_b | zinc finger Ran-binding domain-containing protein 2 isoform 1 | Zinc finger, RAN-binding domain containing 2 | zinc finger Ran-binding domain-containing protein 2 isoform 2	.	.	.	.	.
ENSOARG00000012116	ENSOARP00000012989	2	ENSOARG00000001623, ENSOARG00000012030	MOGAT2	monoacylglycerol O-acyltransferase 2	1	.	XP_014947030.1 (Ovis aries musimon: 97.143% identity in aln 97.2% length of target)XP_014947030.1 (Ovis aries musimon: 97.1% identity in aln 97.2% length of target)	1	1	100	0	1	100	2-acylglycerol O-acyltransferase 2	.	.	.	.	.	.
ENSOARG00000012127	ENSOARP00000012999	0	.	HTR5B	HTR5B	1	.	XP_012021176.1 (Ovis aries musimon: 100.0% identity in aln 97.3% length of target) | XP_005909463.1 (Bos mutus: 98.6% identity in aln 98.4% length of target) | XP_010859565.1 (Bison bison bison: 98.9% identity in aln 100.0% length of target)	8	4	50	6	4	87.5	5-hydroxytryptamine receptor 5B	5-hydroxytryptamine receptor 5B-like	.	.	.	.	.
ENSOARG00000012140	ENSOARP00000013017	0	.	UTP14A	UTP14A small subunit processome component	1	.	XP_011985411.1 (Ovis aries musimon: 99.606% identity in aln 99.6% length of target)XP_011985411.1 (Ovis aries musimon: 99.6% identity in aln 99.6% length of target)	1	1	100	0	1	100	U3 small nucleolar RNA-associated protein 14 homolog A	.	0	0	.	.	.
ENSOARG00000012142	ENSOARP00000013018	0	.	VARS	valyl-tRNA synthetase	8	.	.	0	0	0	0	0	0	.	.	6	-2,+4	.	ACE2,BMX,PIR,VEGFD,PIGA,ASB11,ASB9	.
ENSOARG00000012151	ENSOARP00000013031	0	.	PIR	pirin	1	NP_003653.1 (92.4% identity in aln 99.3% length of target)	XP_005701132.1 (Capra hircus: 99.7% identity in aln 100.0% length of target) | NP_001095828.1 (Bos taurus: 99.3% identity in aln 100.0% length of target) | XP_006194261.1 (Camelus ferus: 94.1% identity in aln 99.3% length of target) | XP_006212706.1 (Vicugna pacos: 93.1% identity in aln 99.3% length of target)	66	7	10.6	56	6	86.4	pirin	Pirin | Chain A, Crystal Structure Of Ferric E32v Pirin | pirin isoform 1 | PIR | Chain A, Study On Structure And Function Relationships In Human Ferric Pirin | Chain A, Crystal Structure Of Human Pirin In Complex With Triphenyl Compound | pirin-like | Chain A, Crystal Structure Of Human Pirin: A Bcl-3 And Nuclear Factor I Interacting Protein And A Cupin Superfamily Member	.	.	.	.	.
ENSOARG00000012198	ENSOARP00000013077	0	.	OR1044	OR1044	1	.	XP_012023172.1 (Ovis aries musimon: 99.4% identity in aln 100.0% length of target) | XP_002693794.1 (Bos taurus: 92.5% identity in aln 100.0% length of target) | XP_010845170.1 (Bison bison bison: 92.2% identity in aln 100.0% length of target)	5	4	80	4	4	80	olfactory receptor 1044	olfactory receptor 8U9	0	0	.	.	.
ENSOARG00000012199	ENSOARP00000013078	0	.	SCAMP2	secretory carrier-associated membrane protein 2	8	.	.	0	0	0	0	0	0	.	.	.	.	.	.	.
ENSOARG00000012216	ENSOARP00000013091	0	.	HPSE2	heparanase 2 (inactive)	4	.	.	108	9	8.3	62	6	76.9	inactive heparanase-2	inactive heparanase-2-like | heparanase 3 | heparanase-like protein HPA2b | Heparanase 2 | heparanase 2, isoform CRA_b | inactive heparanase-2 isoform 1 | heparanase 2 | inactive heparanase-2 precursor | heparanase-like protein HPA2c | inactive heparanase-2 isoform 4 | inactive heparanase-2 isoform 2	3	-2,+1	ENSOARG00000012034/FAM107A	ACOX2,KCTD6,PDHB,PXK	ENSOARG00000014135/RPP14
ENSOARG00000012222	ENSOARP00000013107	0	.	PDHB	pyruvate dehydrogenase (lipoamide) beta	1	.	XP_005695840.1 (Capra hircus: 99.2% identity in aln 100.0% length of target) | XP_005899047.1 (Bos mutus: 98.3% identity in aln 100.0% length of target) | XP_006184877.1 (Camelus ferus: 96.9% identity in aln 100.0% length of target)	85	5	5.9	76	4	77.6	pyruvate dehydrogenase E1 component subunit beta, mitochondrial	PDHB | pyruvate dehydrogenase E1 component subunit beta, mitochondrial precursor | Pyruvate dehydrogenase E1 component subunit beta, mitochondrial | pyruvate dehydrogenase beta | Chain B, Human Pyruvate Dehydrogenase | pyruvate dehydrogenase:SUBUNIT=beta | pyruvate dehydrogenase E1-beta subunit precursor | pyruvate dehydrogenase E1-beta subunit | pyruvate dehydrogenase E1 component subunit beta, …	6	-5,+1	.	ASB9,ASB11,PIGA,VEGFD,PIR,BMX,ACE2	.
ENSOARG00000012224	ENSOARP00000013109	1	ENSOARG00000012887	BMX	BMX non-receptor tyrosine kinase	1	.	XP_005701131.1 (Capra hircus: 99.4% identity in aln 100.0% length of target) | XP_005903174.1 (Bos mutus: 98.8% identity in aln 100.0% length of target) | XP_005228505.1 (Bos taurus: 98.8% identity in aln 100.0% length of target) | XP_006041603.1 (Bubalus bubalis: 98.5% identity in aln 100.0% length of target)	43	8	18.6	30	4	97.7	cytoplasmic tyrosine-protein kinase BMX	RecName: Full=Cytoplasmic tyrosine-protein kinase BMX; AltName: Full=Bone marrow tyrosine kinase gene in chromosome X protein homolog	.	.	.	.	.
ENSOARG00000012227	ENSOARP00000013102	0	.	HHAT	protein-cysteine N-palmitoyltransferase HHAT	6	.	XP_013825896.1 (Capra hircus: 100.000% identity in aln 47.9% length of target)	11	10	90.9	5	6	72.7	protein-cysteine N-palmitoyltransferase HHAT	.	0	0	ENSOARG00000012270/TSTA3	.	.
ENSOARG00000012243	ENSOARP00000013121	0	.	PYCRL	pyrroline-5-carboxylate reductase 3	8	.	.	0	0	0	0	0	0	.	.	.	.	.	.	.
ENSOARG00000012283	ENSOARP00000013161	0	.	SUMO3	small ubiquitin-like modifier 3	1	.	XP_012027006.1 (Ovis aries musimon: 99.0% identity in aln 94.2% length of target) | XP_010827611.1 (Bison bison bison: 94.9% identity in aln 94.2% length of target)	34	7	20.6	26	5	85.3	small ubiquitin-related modifier 3	small ubiquitin-related modifier 3 precursor | Small ubiquitin-related modifier 3 precursor | Small ubiquitin-related modifier 3 | NFATC2-interacting protein-like | small ubiquitin-related modifier 3-like	1	0,+1	ENSOARG00000012482/DIEXF	SYT14,SERTAD4	.
ENSOARG00000012287	ENSOARP00000013165	0	.	SYT14	synaptotagmin 14	1	.	XP_010811912.1 (Bos taurus: 98.5% identity in aln 100.0% length of target) | XP_006180805.1 (Camelus ferus: 97.7% identity in aln 100.0% length of target) | XP_006198793.1 (Vicugna pacos: 97.3% identity in aln 100.0% length of target) | XP_005981124.1 (Pantholops hodgsonii: 99.2% identity in aln 100.0% length of target)	50	4	8	45	4	92	synaptotagmin-14	synaptotagmin-14 isoform 2 | synaptotagmin-14 isoform 5 | Synaptotagmin-14	1	-1,0	.	FPGT,TNNI3K	.
ENSOARG00000012319	ENSOARP00000013202	0	.	TNNI3K	TNNI3 interacting kinase	1	NP_057062.1 (95.4% identity in aln 100.0% length of target)	XP_014944476.1 (Ovis aries musimon: 99.9% identity in aln 100.0% length of target) | XP_005678316.1 (Capra hircus: 99.5% identity in aln 100.0% length of target) | NP_001071476.1 (Bos taurus: 98.6% identity in aln 100.0% length of target) | XP_014409344.1 (Camelus ferus: 97.2% identity in aln 100.0% length of target)	123	6	4.9	80	4	88.6	serine/threonine-protein kinase TNNI3K	Serine/threonine-protein kinase TNNI3K | serine/threonine-protein kinase TNNI3K-like isoform 2 | FPGT-TNNI3K fusion protein isoform a | serine/threonine-protein kinase TNNI3K-like isoform 3 | TNNI3 interacting kinase variant | serine/threonine-protein kinase TNNI3K isoform 1	8	-7,+1	ENSOARG00000012071/DUSP11	C2orf78,STAMBP,ACTG2,DGUOK,TET3,BOLA3,MOB1A,MTHFD2,SLC4A5	ENSOARG00000012443/ENSBTAG00000010072
ENSOARG00000012350	ENSOARP00000013234	1	ENSOARG00000016157	MTHFD2	methylenetetrahydrofolate dehydrogenase (NADP+ dependent) 2, methenyltetrahydrofolate cyclohydrolase	1	.	XP_013822948.1 (Capra hircus: 99.4% identity in aln 100.0% length of target) | XP_005897710.1 (Bos mutus: 97.7% identity in aln 100.0% length of target) | NP_001069223.1 (Bos taurus: 97.7% identity in aln 100.0% length of target) | XP_006045485.1 (Bubalus bubalis: 97.7% identity in aln 92.6% length of target) | XP_010828037.1 (Bison bison bison: 97.7% identity in aln 100.0% length of target) | XP…	44	6	13.6	38	5	97.7	bifunctional methylenetetrahydrofolate dehydrogenase/cyclohydrolase, mitochondrial	bifunctional methylenetetrahydrofolate dehydrogenase/cyclohydrolase	0	0	.	.	.
ENSOARG00000012351	ENSOARP00000013233	0	.	ZC3H14	zinc finger CCCH domain-containing protein 14	8	.	.	0	0	0	0	0	0	.	.	.	.	.	.	.
ENSOARG00000012353	ENSOARP00000013237	0	.	AKR1B1	aldo-keto reductase family 1 member B	8	.	.	0	0	0	0	0	0	.	.	5	0,+5	.	WDR66,BCL7A,MLXIP,LRRC43,B3GNT4,DIABLO	.
ENSOARG00000012364	ENSOARP00000013247	0	.	WDR66	WD repeat domain 66	4	.	.	21	8	38.1	17	8	100	WD repeat-containing protein 66	.	.	.	.	.	.
ENSOARG00000012401	ENSOARP00000013283	0	.	RNASE7	ribonuclease A family member 7	1	.	XP_012022544.1 (Ovis aries musimon: 99.4% identity in aln 100.0% length of target) | XP_005685432.1 (Capra hircus: 97.4% identity in aln 100.0% length of target) | XP_006062136.1 (Bubalus bubalis: 91.7% identity in aln 100.0% length of target) | XP_010837716.1 (Bison bison bison: 91.7% identity in aln 100.0% length of target) | XP_005960956.1 (Pantholops hodgsonii: 93.6% identity in aln 100.0% le…	6	5	83.3	5	5	100	ribonuclease 7	.	4	-4,0	.	RHOF,SETD1B,HPD,PSMD9,WDR66	.
ENSOARG00000012404	ENSOARP00000013285	0	.	WDR66	WD repeat domain 66	8	.	.	0	0	0	0	0	0	.	.	5	-1,+4	ENSOARG00000012124/ENSBTAG00000037483	DGAT2,UVRAG,WNT11,THAP12,EMSY,LRRC32	ENSOARG00000013072/ENSBTAG00000027438
ENSOARG00000012416	ENSOARP00000013314	0	.	UVRAG	UV radiation resistance associated	1	NP_003360.2 (93.6% identity in aln 94.6% length of target)	XP_012010259.1 (Ovis aries musimon: 99.4% identity in aln 99.2% length of target) | XP_005690061.1 (Capra hircus: 99.8% identity in aln 94.6% length of target) | XP_005902559.1 (Bos mutus: 99.2% identity in aln 94.6% length of target) | NP_001179955.1 (Bos taurus: 98.9% identity in aln 94.6% length of target) | XP_014412170.1 (Camelus ferus: 95.0% identity in aln 94.6% length of target) | XP_0150…	69	9	13	35	6	92.8	UV radiation resistance-associated gene protein	UV radiation resistance-associated protein | p63 (processed form) | UV radiation resistance associated gene variant | UV radiation resistance associated gene	7	-7,0	.	PDE12,ARF4,DENND6A,SLMAP,FLNB,DNASE1L3,ABHD6,RPP14	ENSOARG00000014135/PXK
ENSOARG00000012424	ENSOARP00000013316	0	.	RPP14	ribonuclease P/MRP subunit p14	1	NP_008973.1 (92.7% identity in aln 100.0% length of target)	XP_005695846.1 (Capra hircus: 99.2% identity in aln 100.0% length of target) | XP_005899052.1 (Bos mutus: 96.8% identity in aln 100.0% length of target) | NP_001071392.1 (Bos taurus: 98.4% identity in aln 100.0% length of target) | XP_006041439.1 (Bubalus bubalis: 99.2% identity in aln 100.0% length of target) | XP_006196511.1 (Vicugna pacos: 91.9% identity in aln 100.0% length of target)	44	9	20.5	50	6	93.2	ribonuclease P protein subunit p14	ribonuclease P protein subunit p14-like | ribonuclease P 14kDa subunit	4	-3,+1	.	RHOF,SETD1B,HPD,PSMD9,WDR66	.
ENSOARG00000012456	ENSOARP00000013352	0	.	PSMD9	proteasome 26S subunit, non-ATPase 9	1	.	XP_005691460.1 (Capra hircus: 99.5% identity in aln 100.0% length of target) | NP_001029613.1 (Bos taurus: 98.6% identity in aln 100.0% length of target) | XP_006047226.1 (Bubalus bubalis: 97.7% identity in aln 100.0% length of target) | XP_006178110.1 (Camelus ferus: 90.0% identity in aln 100.0% length of target) | XP_006209572.1 (Vicugna pacos: 90.0% identity in aln 100.0% length of target)	6	6	100	7	6	100	26S proteasome non-ATPase regulatory subunit 9	.	0	0	ENSOARG00000012462/ENSBTAG00000009166	.	.
ENSOARG00000012459	ENSOARP00000013351	0	.	PDX1	pancreatic and duodenal homeobox 1	4	.	.	87	6	6.9	72	5	85.1	pancreas/duodenum homeobox protein 1	Pancreas/duodenum homeobox protein 1 | RecName: Full=Pancreas/duodenum homeobox protein 1; AltName: Full=Homeodomain protein PDX1; AltName: Full=Insulin promoter factor 1; Short=IPF-1 | pancreas/duodenum homeobox protein 1-like protein | motor neuron and pancreas homeobox protein 1-like | RecName: Full=Pancreas/duodenum homeobox protein 1; AltName: Full=Insulin promoter factor 1; Short=IPF-1; Alt…	0	0	.	.	.
ENSOARG00000012467	ENSOARP00000013359	0	.	CHRAC1	chromatin accessibility complex protein 1	8	.	.	0	0	0	0	0	0	.	.	.	.	.	.	.
ENSOARG00000012550	ENSOARP00000013447	0	.	OOSP1	OOSP1	1	.	XP_012023241.1 (Ovis aries musimon: 99.4% identity in aln 100.0% length of target) | XP_005690395.1 (Capra hircus: 95.1% identity in aln 100.0% length of target) | XP_005906484.1 (Bos mutus: 90.8% identity in aln 100.0% length of target) | XP_006068124.1 (Bubalus bubalis: 91.4% identity in aln 100.0% length of target) | XP_010842017.1 (Bison bison bison: 90.8% identity in aln 100.0% length of tar…	6	6	100	4	5	83.3	oocyte-secreted protein 1	oocyte-secreted protein 1 precursor	.	.	.	.	.
ENSOARG00000012562	ENSOARP00000013462	1	.	ANG1	ANG1	1	.	XP_012026481.1 (Ovis aries musimon: 99.3% identity in aln 100.0% length of target) | XP_005685449.1 (Capra hircus: 98.6% identity in aln 100.0% length of target) | XP_005900654.1 (Bos mutus: 91.2% identity in aln 100.0% length of target) | XP_006062107.1 (Bubalus bubalis: 94.6% identity in aln 100.0% length of target)	5	4	80	5	4	100	angiogenin-1	.	1	-1,0	.	ATP6V0D2,WWP1	.
ENSOARG00000012595	ENSOARP00000013501	0	.	WWP1	WW domain containing E3 ubiquitin protein ligase 1	8	.	.	0	0	0	0	0	0	.	.	0	0	.	.	.
ENSOARG00000012609	ENSOARP00000013509	1	.	RDH12	RDH12	1	.	XP_005686393.1 (Capra hircus: 99.7% identity in aln 99.4% length of target) | XP_005906782.1 (Bos mutus: 97.6% identity in aln 99.4% length of target) | XP_006068002.1 (Bubalus bubalis: 97.3% identity in aln 99.4% length of target) | XP_010828030.1 (Bison bison bison: 98.2% identity in aln 99.4% length of target) | XP_005965253.1 (Pantholops hodgsonii: 98.5% identity in aln 99.4% length of target)	10	6	60	9	6	100	retinol dehydrogenase 12	.	.	.	.	.	.
ENSOARG00000012644	ENSOARP00000013543	0	.	TMEM27	transmembrane protein 27	8	.	.	0	0	0	0	0	0	.	.	.	.	.	.	.
ENSOARG00000012651	ENSOARP00000013553	0	.	TMEM27	transmembrane protein 27	3	XP_016885169.1 (90.3% identity in aln 60.6% length of target)	XP_006041606.1 (Bubalus bubalis: 98.1% identity in aln 66.9% length of target) | XP_006212714.2 (Vicugna pacos: 95.1% identity in aln 64.4% length of target)	46	4	8.7	34	4	89.1	collectrin	collectrin precursor | TMEM27 | collectrin-like | NX-17	.	.	.	.	.
ENSOARG00000012660	ENSOARP00000013563	0	.	CLIC6	chloride intracellular channel 6	2	.	XP_013819571.1 (Capra hircus: 99.6% identity in aln 80.9% length of target) | XP_006187573.1 (Camelus ferus: 97.4% identity in aln 80.9% length of target) | XP_006205051.2 (Vicugna pacos: 96.9% identity in aln 78.6% length of target)	113	9	8	78	8	79.6	chloride intracellular channel protein 6	Chloride intracellular channel protein 6 | chloride intracellular channel protein 6-like | chloride intracellular channel 6, isoform CRA_b | CLIC6 protein | chloride intracellular channel protein 6 isoform 1 | chloride intracellular channel 6, isoform CRA_a | chloride intracellular channel protein 5-like | chloride intracellular channel protein 6 isoform 2	.	.	.	.	.
ENSOARG00000012669	ENSOARP00000013568	0	.	INO80B	INO80 complex subunit B	1	NP_112578.2 (96.1% identity in aln 99.7% length of target)	XP_005906789.1 (Bos mutus: 98.7% identity in aln 99.7% length of target) | NP_001098817.1 (Bos taurus: 99.2% identity in aln 99.7% length of target) | XP_006067988.1 (Bubalus bubalis: 98.9% identity in aln 99.7% length of target) | XP_006219109.1 (Vicugna pacos: 96.8% identity in aln 99.7% length of target)	69	5	7.2	54	4	92.8	INO80 complex subunit B	hCG2039827, isoform CRA_a | PAPA-1 | INO80B protein | hCG2039827, isoform CRA_e | INO80 complex subunit B isoform 1	.	.	.	.	.
ENSOARG00000012671	ENSOARP00000013570	0	.	RNASE1	ribonuclease pancreatic	6	.	XP_004010433.1 (Ovis aries: 100.000% identity in aln 100.0% length of target)	3	3	100	2	3	66.7	ribonuclease pancreatic	.	.	.	.	.	.
ENSOARG00000012713	ENSOARP00000013620	0	.	ZRSR2	zinc finger CCCH-type, RNA binding motif and serine/arginine rich 2	1	.	XP_012026315.1 (Ovis aries musimon: 99.786% identity in aln 100.0% length of target)XP_012026315.1 (Ovis aries musimon: 99.8% identity in aln 100.0% length of target) | XP_010857086.1 (Bison bison bison: 97.9% identity in aln 100.0% length of target)	3	2	66.7	2	2	100	U2 small nuclear ribonucleoprotein auxiliary factor 35 kDa subunit-related protein 2	.	.	.	.	.	.
ENSOARG00000012765	ENSOARP00000013671	0	.	ZNF709	zinc finger protein 709	1	.	XP_012000156.1 (Ovis aries musimon: 99.742% identity in aln 100.0% length of target)XP_012000156.1 (Ovis aries musimon: 99.7% identity in aln 100.0% length of target) | XP_005682353.2 (Capra hircus: 91.4% identity in aln 100.0% length of target) | XP_005970267.1 (Pantholops hodgsonii: 99.5% identity in aln 99.7% length of target)	4	4	100	2	3	100	zinc finger protein 709-like	.	.	.	.	.	.
ENSOARG00000012791	ENSOARP00000013699	1	.	OR2T27	OR2T27	1	.	XP_011971712.1 (Ovis aries musimon: 99.3% identity in aln 99.4% length of target) | XP_005683324.1 (Capra hircus: 98.7% identity in aln 99.4% length of target) | XP_006044573.1 (Bubalus bubalis: 99.3% identity in aln 99.4% length of target) | XP_010851067.1 (Bison bison bison: 97.4% identity in aln 99.4% length of target) | XP_005959695.1 (Pantholops hodgsonii: 97.4% identity in aln 99.4% length …	5	5	100	4	5	100	olfactory receptor 2T27	.	0	0	ENSOARG00000012916/RNF145	.	.
ENSOARG00000012836	ENSOARP00000013747	0	.	EBF1	early B-cell factor 1	1	XP_016864688.1 (98.7% identity in aln 95.0% length of target)	.	98	3	3.1	93	3	89.8	transcription factor COE1	transcription factor COE1-like | early B-cell factor, isoform CRA_b | transcription factor COE1 isoform 1 | transcription factor COE1 isoform 4 | transcription factor COE1 isoform 10 | Transcription factor COE1 | transcription factor COE3 isoform C | early B-cell factor 1, isoform CRA_c	9	0,+9	ENSOARG00000012823/ASB17	ST6GALNAC5,PIGK,AK5,ZZZ3,USP33,MIGA1,NEXN,FUBP1,DNAJB4,GIPC2	.
ENSOARG00000012837	ENSOARP00000013745	0	.	ST6GALNAC5	ST6 N-acetylgalactosaminide alpha-2,6-sialyltransferase 5	2	.	XP_006187065.1 (Camelus ferus: 96.9% identity in aln 78.9% length of target) | XP_006206032.1 (Vicugna pacos: 97.4% identity in aln 78.9% length of target)	89	7	7.9	77	6	88.8	alpha-N-acetylgalactosaminide alpha-2,6-sialyltransferase 5	Alpha-N-acetylgalactosaminide alpha-2,6-sialyltransferase 5 | alpha-N-acetylgalactosaminide alpha-2,6-sialyltransferase 5-like | RecName: Full=Alpha-N-acetylgalactosaminide alpha-2,6-sialyltransferase 5; AltName: Full=GD1 alpha synthase; AltName: Full=GalNAc alpha-2,6-sialyltransferase V; AltName: Full=ST6GalNAc V; Short=ST6GalNAcV; AltName: Full=Sialyltransferase 7E; Short=SIAT7-E | alpha-N-acet…	0	0	ENSOARG00000012794/ENSBTAG00000010577	.	.
ENSOARG00000012848	ENSOARP00000013757	0	.	PPAT	phosphoribosyl pyrophosphate amidotransferase	8	.	.	0	0	0	0	0	0	.	.	3	-2,+1	.	CCDC155,DKKL1,TEAD2,CD37	ENSOARG00000020019/ENSBTAG00000030544
ENSOARG00000012881	ENSOARP00000013801	0	.	TEAD2	transcriptional enhancer factor TEF-4	8	.	.	0	0	0	0	0	0	.	.	.	.	.	.	.
ENSOARG00000012897	ENSOARP00000013813	0	.	CABP1	calcium binding protein 1	1	.	NP_776679.1 (Bos taurus: 99.6% identity in aln 99.6% length of target) | XP_006053008.1 (Bubalus bubalis: 99.1% identity in aln 99.6% length of target) | XP_006178165.1 (Camelus ferus: 99.1% identity in aln 99.6% length of target) | XP_006204878.1 (Vicugna pacos: 100.0% identity in aln 99.6% length of target)	7	4	57.1	11	4	100	calcium-binding protein 1	.	.	.	.	.	.
ENSOARG00000012899	ENSOARP00000013815	0	.	TMPO	thymopoietin	2	.	XP_011990297.1 (Ovis aries musimon: 99.7% identity in aln 79.7% length of target) | XP_013819450.1 (Capra hircus: 99.4% identity in aln 79.7% length of target) | XP_015103467.1 (Vicugna pacos: 96.4% identity in aln 80.4% length of target)	42	5	11.9	43	5	83.3	thymopoietin	lamina-associated polypeptide 2, isoforms beta/gamma | lamina-associated polypeptide 2, isoforms beta/delta/epsilon/gamma | thymopoietin isoform beta | lamina-associated polypeptide 2, isoforms beta/delta/epsilon/gamma isoform 3 | thymopoietin-2	0	0	.	.	.
ENSOARG00000012932	ENSOARP00000013849	0	.	EI24	EI24, autophagy associated transmembrane protein	5	.	.	6	0	0	5	0	100	etoposide-induced protein 2.4 homolog	.	.	.	.	.	.
ENSOARG00000012982	ENSOARP00000013902	0	.	METTL16	methyltransferase like 16	8	.	.	0	0	0	0	0	0	.	.	.	.	.	.	.
ENSOARG00000013015	ENSOARP00000013934	0	.	TAMM41	TAM41 mitochondrial translocator assembly and maintenance homolog	6	.	XP_011969724.1 (Ovis aries musimon: 100.000% identity in aln 44.5% length of target)	53	7	13.2	38	6	67.9	phosphatidate cytidylyltransferase, mitochondrial	.	0	0	.	.	.
ENSOARG00000013034	ENSOARP00000013964	0	.	CCT6A	chaperonin containing TCP1 subunit 6A	8	.	.	0	0	0	0	0	0	.	.	1	-1,0	ENSOARG00000013002/SLC4A4	GC,NPFFR2	ENSOARG00000013094/ADAMTS3
ENSOARG00000013035	ENSOARP00000013965	0	.	NPFFR2	neuropeptide FF receptor 2	8	.	.	0	0	0	0	0	0	.	.	5	-5,0	.	PGM5,TMEM252,FAM122A,PIP5K1B,FXN,TJP2	ENSOARG00000013021/FAM189A2
ENSOARG00000013044	ENSOARP00000013978	0	.	TJP2	tight junction protein ZO-2	8	.	.	0	0	0	0	0	0	.	.	.	.	.	.	.
ENSOARG00000013057	ENSOARP00000013988	0	.	POM121C	nuclear envelope pore membrane protein POM 121C	8	.	.	0	0	0	0	0	0	.	.	0	0	ENSOARG00000013131/ENSBTAG00000046042	.	ENSOARG00000013046/ENSBTAG00000030725
[truncated: 518 more rows]
