# Supplementary material for: A high resolution atlas of gene expression in the domestic sheep (Ovis aries)
Source: PLoS Genet. 2017 Sep 15;13(9):e1006997. doi: 10.1371/journal.pgen.1006997 (PMC5626511; doi:10.1371/journal.pgen.1006997)
Supplement: S14 Table — (XLSX) [file pgen.1006997.s020.xlsx]

## Sheet: S14 Table
S14 Table. Manual annotation of unannotated genes in cluster 12 (genes with a T-cell signature)
Gene ID	Probable description (based on blast hits to NCBI nr)
ENSOARG00000000435	T-cell receptor beta chain, partial
ENSOARG00000000440	T-cell receptor beta chain, partial
ENSOARG00000000448	T-cell receptor beta chain, partial
ENSOARG00000000598	uncharacterized protein
ENSOARG00000000785	lck-interacting transmembrane adapter 1
ENSOARG00000000980	group XV phospholipase A2
ENSOARG00000001017	T-cell receptor alpha chain, partial
ENSOARG00000001088	T-cell receptor delta chain, partial
ENSOARG00000001233	T-cell receptor beta chain, partial
ENSOARG00000001323	T-cell receptor beta chain, partial
ENSOARG00000001331	T-cell receptor beta chain, partial
ENSOARG00000001657	T-cell surface glycoprotein CD1b-like
ENSOARG00000001797	T-cell receptor gamma chain, partial
ENSOARG00000001971	T-cell surface glycoprotein CD1b-like
ENSOARG00000001984	T-cell surface glycoprotein CD1b-like
ENSOARG00000001986	T-cell surface glycoprotein CD1b-like
ENSOARG00000002089	T-cell receptor alpha chain, partial
ENSOARG00000002156	T-cell receptor beta chain, partial
ENSOARG00000002166	T-cell receptor beta chain, partial
ENSOARG00000002265	T-cell receptor delta chain, partial
ENSOARG00000002270	T-cell receptor alpha chain, partial
ENSOARG00000002430	T-cell receptor beta chain, partial
ENSOARG00000002532	T-cell surface glycoprotein CD1b-like
ENSOARG00000002609	T-cell receptor alpha chain, partial
ENSOARG00000002614	T-cell surface glycoprotein CD1b-like
ENSOARG00000002853	T-cell surface glycoprotein CD1b-like
ENSOARG00000002914	T-cell receptor beta chain, partial
ENSOARG00000003398	tripartite motif-containing protein 43-like
ENSOARG00000004082	sperm-associated antigen 11-like
ENSOARG00000004129	G-protein coupled receptor 183-like
ENSOARG00000006355	putative protein FAM90A12P or putative protein FAM90A13P or putative protein FAM90A15P or putative protein FAM90A23P
ENSOARG00000006374	T-cell receptor beta chain, partial
ENSOARG00000006483	putative protein FAM90A12P or putative protein FAM90A13P or putative protein FAM90A15P or putative protein FAM90A23P
ENSOARG00000006921	olfactory receptor 10T2-like
ENSOARG00000007267	T-cell surface glycoprotein CD1a-like
ENSOARG00000007282	T-cell surface glycoprotein CD1b-like
ENSOARG00000007291	T-cell surface glycoprotein CD1b-like
ENSOARG00000007322	T-cell surface glycoprotein CD1a-like
ENSOARG00000007336	olfactory receptor 10R2-like
ENSOARG00000008110	carbohydrate-binding protein AQN-1 or spermadhesin-1-like
ENSOARG00000008184	spermadhesin-1-like
ENSOARG00000008937	odorant-binding protein
ENSOARG00000008993	T-lymphocyte surface antigen Ly-9
ENSOARG00000009129	T-cell receptor gamma chain, partial
ENSOARG00000009188	T-cell receptor gamma chain, partial
ENSOARG00000009953	T-cell receptor alpha chain, partial
ENSOARG00000009987	T-cell receptor delta chain, partial
ENSOARG00000010060	phospholipid hydroperoxide glutathione peroxidase, mitochondrial
ENSOARG00000011106	T-cell receptor beta chain, partial
ENSOARG00000011375	blood vessel epicardial substance
ENSOARG00000012009	T-cell receptor alpha chain, partial
ENSOARG00000012203	envelope glycoprotein (endogenous virus)
ENSOARG00000013117	forkhead box protein D4-like 1
ENSOARG00000015350	putative DBH-like monooxygenase protein 2
ENSOARG00000015445	T-cell receptor beta chain, partial
ENSOARG00000015667	T-cell receptor beta chain, partial
ENSOARG00000015694	T-cell receptor beta chain, partial
ENSOARG00000015769	T-cell receptor beta chain, partial
ENSOARG00000015797	T-cell receptor beta chain, partial
ENSOARG00000015845	T-cell receptor beta chain, partial
ENSOARG00000015880	T-cell receptor beta chain, partial
ENSOARG00000015913	T-cell receptor beta chain, partial
ENSOARG00000015915	zinc finger matrin-type protein 1-like
ENSOARG00000015944	TATA-box-binding protein
ENSOARG00000015951	T-cell receptor beta chain, partial
ENSOARG00000015983	T-cell receptor beta chain, partial
ENSOARG00000015991	T-cell receptor beta chain, partial
ENSOARG00000015992	T-cell receptor beta chain, partial
ENSOARG00000016000	T-cell receptor beta chain, partial
ENSOARG00000016005	T-cell receptor beta chain, partial
ENSOARG00000016049	T-cell receptor beta chain, partial
ENSOARG00000016085	T-cell receptor beta chain, partial
ENSOARG00000016091	T-cell receptor beta chain, partial
ENSOARG00000016158	T-cell receptor beta chain, partial
ENSOARG00000016232	T-cell receptor beta chain, partial
ENSOARG00000016269	T-cell receptor beta chain, partial
ENSOARG00000016275	T-cell receptor beta chain, partial
ENSOARG00000016279	T-cell receptor beta chain, partial
ENSOARG00000016314	T-cell receptor beta chain, partial
ENSOARG00000016418	rap guanine nucleotide exchange factor 6
ENSOARG00000016464	T-cell receptor beta chain, partial
ENSOARG00000017970	T-cell receptor gamma chain, partial
ENSOARG00000018868	lipopolysaccharide-binding protein-like
ENSOARG00000019507	T-cell receptor alpha chain, partial
ENSOARG00000019509	T-cell receptor delta chain, partial
ENSOARG00000019537	T-cell receptor alpha chain, partial
ENSOARG00000019543	T-cell receptor alpha chain, partial (V-like)
ENSOARG00000019567	T-cell receptor alpha chain, partial
ENSOARG00000019573	T-cell receptor alpha chain, partial (V region CTL-F3 or V region RL-5)
ENSOARG00000019576	T-cell receptor alpha chain, partial
ENSOARG00000019589	T-cell receptor alpha chain, partial
ENSOARG00000019593	T-cell receptor alpha chain, partial
ENSOARG00000019600	T-cell receptor alpha chain, partial
ENSOARG00000020359	lysophosphatidic acid receptor 5
ENSOARG00000020942	E3 ubiquitin-protein ligase makorin-1
