# Supplementary material for: A high resolution atlas of gene expression in the domestic sheep (Ovis aries)
Source: PLoS Genet. 2017 Sep 15;13(9):e1006997. doi: 10.1371/journal.pgen.1006997 (PMC5626511; doi:10.1371/journal.pgen.1006997)
Supplement: S16 Table — (XLSX) [file pgen.1006997.s022.xlsx]

## Sheet: S16 Table
S16 Table. Genes with five-fold sex-biased expression in at least one TxBF tissue.
Genes are listed if they have:
(a) a female:male (F:M) ratio either > 1 (female) or < 1 (male) in all adult TxBF tissues that have both female and male samples (i.e., in the 'core' atlas),
(b) for female-biased genes: a F:M ratio > 5 in at least one tissue with male TPM >= 10,
(c) for male-biased genes: a F:M ratio < 0.2 in at least one tissue with female TPM >= 10.
Gene name	Ensembl gene ID	Location	Gene type	Description	GO terms (molecular function)	GO terms (biological process)	GO terms (cellular component)	abomasum (female)	abomasum (male)	abomasum (F:M ratio)	adrenal gland cortex (female)	adrenal gland cortex (male)	adrenal gland cortex (F:M ratio)	adrenal gland medulla (female)	adrenal gland medulla (male)	adrenal gland medulla (F:M ratio)	alveolar macrophage (female)	alveolar macrophage (male)	alveolar macrophage (F:M ratio)	aortic valve (female)	aortic valve (male)	aortic valve (F:M ratio)	blood leukocytes (female)	blood leukocytes (male)	blood leukocytes (F:M ratio)	cerebellum (female)	cerebellum (male)	cerebellum (F:M ratio)	colon distal (female)	colon distal (male)	colon distal (F:M ratio)	colon spiral (female)	colon spiral (male)	colon spiral (F:M ratio)	hemolymph node (female)	hemolymph node (male)	hemolymph node (F:M ratio)	hippocampus (female)	hippocampus (male)	hippocampus (F:M ratio)	ileum (female)	ileum (male)	ileum (F:M ratio)	jejunum (female)	jejunum (male)	jejunum (F:M ratio)	kidney cortex (female)	kidney cortex (male)	kidney cortex (F:M ratio)
Female-biased expression (F:M ratio > 5 and minimum male TPM >= 10 in at least one tissue)
CLDN18	ENSOARG00000007703	1:249193938-249216316:-1	protein-coding	claudin 18	structural molecule activity (GO:0005198) | protein binding (GO:0005515)	negative regulation of protein localization to nucleus (GO:1900181) | digestive tract development (GO:0048565) | TNFSF11-mediated signaling pathway (GO:0071847) | negative regulation of bone resorption (GO:0045779) | negative regulation of osteoclast development (GO:2001205)	integral component of membrane (GO:0016021) | cell junction (GO:0030054) | membrane (GO:0016020) | plasma membrane (GO:0005886) | bicellular tight junction (GO:0005923)	401.784	234.105	1.716	0	0	NA	0	0	NA	0.09	0	NA	0	0.2325	NA	10.201	3.721	2.741	0	0	NA	0	0.112	NA	0	0	NA	1.0825	0.093	NA	0	0.648	NA	0	0	NA	0	0	NA	0.095	0	NA
DCSTAMP	ENSOARG00000015726	9:72885528-72900115:-1	protein-coding	dendrocyte expressed seven transmembrane protein	protein binding (GO:0005515)	negative regulation of cell growth (GO:0030308) | myeloid dendritic cell differentiation (GO:0043011) | cellular response to interleukin-4 (GO:0071353) | membrane fusion (GO:0061025) | cellular response to tumor necrosis factor (GO:0071356) | cellular response to macrophage colony-stimulating factor stimulus (GO:0036006) | positive regulation of macrophage fusion (GO:0034241) | positive regulatio…	integral component of membrane (GO:0016021) | endosome membrane (GO:0010008) | integral component of endoplasmic reticulum membrane (GO:0030176) | endoplasmic reticulum membrane (GO:0005789) | cell surface (GO:0009986) | integral component of plasma membrane (GO:0005887)	0.011	0	NA	0	0.052	NA	0	0	NA	140.271	26.289	5.336	0	0	NA	0.259	0.037	NA	0	0	NA	0.023	0	NA	0.049	0	NA	0.141	0.017	NA	0.043	0	NA	0.021	0.0105	NA	0.021	0	NA	0.132	0.083	NA
ENSOARG00000001181	ENSOARG00000001181	JH923009.1:20523-21472:+1	protein-coding	.	peptide antigen binding (GO:0042605)	antigen processing and presentation (GO:0019882) | immune response (GO:0006955) | antigen processing and presentation of peptide antigen via MHC class I (GO:0002474)	MHC class I protein complex (GO:0042612) | membrane (GO:0016020)	29.42	23.968	1.227	96.046	41.194	2.332	95.317	25.923	3.677	87.473	29.498	2.965	86.461	28.3135	3.054	202.686	91.371	2.218	8.622	3.986	2.163	101.492	74.338	1.365	110.847	54.251	2.043	258.294	70.403	3.669	11.067	5.052	2.191	281.121	120.035	2.342	203.536	100.699	2.021	36.318	1.902	19.095
ENSOARG00000001900	ENSOARG00000001900	JH921717.1:4266-4761:+1	protein-coding	.	protein binding (GO:0005515)	unknown	unknown	18.634	0.79	NA	42.89	0.695	NA	68.987	0.894	NA	30.136	1.378	21.869	34.897	0.1175	NA	73.112	3.992	18.315	2.959	0.438	NA	53.842	1.642	32.79	60.881	1.569	38.802	85.239	5.519	15.445	5.533	1.067	5.186	253.338	7.784	32.546	98.82	4.252	23.241	14.133	0	NA
ENSOARG00000002036	ENSOARG00000002036	JH921966.1:10371-12785:-1	protein-coding	.	unknown	lipid metabolic process (GO:0006629)	unknown	744.166	127.092	5.855	51.154	10.237	4.997	42.104	7.346	5.732	42.821	3.49	12.27	50.9505	6.926	7.356	1171.21	143.547	8.159	4.132	0.757	NA	233.497	10.082	23.16	440.184	64.684	6.805	235.473	5.549	42.435	2.572	0.523	NA	1397.18	230.315	6.066	846.748	574.359	1.474	99.17	14.25	6.959
ENSOARG00000009143	ENSOARG00000009143	18:68547748-68551257:-1	protein-coding	.	protein binding (GO:0005515)	unknown	unknown	344.206	92.264	3.731	1.602	0.447	NA	2.447	0.927	NA	5.221	0.938	NA	1.54	0.5695	NA	421.531	235.822	1.787	20.084	0.673	NA	1262.22	417.952	3.02	1729.35	715.592	2.417	6411.03	1496.41	4.284	6.983	6.509	1.073	1421.92	451.955	3.146	901.843	607.233	1.485	51.945	7.649	6.791
ENSOARG00000010692	ENSOARG00000010692	20:27187822-27197278:-1	protein-coding	.	unknown	unknown	unknown	235.626	183.595	1.283	0	0.028	NA	0	0	NA	0.021	0	NA	0.021	0.719	NA	0	0	NA	0	0	NA	0.047	0	NA	0	0	NA	0	0	NA	0	0	NA	0	0.0855	NA	0.033	0.038	NA	0.046	0	NA
ENSOARG00000015425	ENSOARG00000015425	15:59188092-59190048:+1	protein-coding	Follitropin subunit beta	hormone activity (GO:0005179)	estradiol secretion (GO:0035938)	cell (GO:0005623) | extracellular region (GO:0005576)	0	0	NA	0	0	NA	0	0	NA	0	0	NA	0	0	NA	0	0	NA	0	0	NA	0	0	NA	0	0	NA	0	0	NA	0	0.018	NA	0	0	NA	0	0	NA	0	0	NA
ENSOARG00000019633	ENSOARG00000019633	2:132898115-132898351:-1	protein-coding	.	sequence-specific DNA binding (GO:0043565) | DNA binding (GO:0003677)	regulation of transcription, DNA-templated (GO:0006355)	nucleus (GO:0005634)	0	0	NA	0	0	NA	0	0	NA	0	0	NA	0.3175	0	NA	0	0	NA	0	0	NA	157.974	16.942	9.324	7.63	3.284	2.323	1.725	0	NA	0	0	NA	0	0	NA	0	0	NA	29.211	21.887	1.335
ENSOARG00000025189	ENSOARG00000025189	AMGL01120400.1:1113-3739:+1	protein-coding	.	unknown	unknown	unknown	0	0	NA	0	0	NA	0	0	NA	0	0	NA	0	0	NA	0	0	NA	0	0	NA	0	0	NA	0	0	NA	0.7305	0	NA	0	0	NA	29.16	0	NA	0	0	NA	0	0	NA
OCSTAMP	ENSOARG00000008956	13:74793765-74800407:-1	protein-coding	osteoclast stimulatory transmembrane protein	unknown	cellular response to tumor necrosis factor (GO:0071356) | cellular response to estrogen stimulus (GO:0071391) | positive regulation of osteoclast proliferation (GO:0090290) | positive regulation of osteoclast differentiation (GO:0045672) | positive regulation of macrophage fusion (GO:0034241) | multinuclear osteoclast differentiation (GO:0072674)	integral component of membrane (GO:0016021)	0.033	0.042	NA	0	0	NA	0	0	NA	81.076	14.273	5.68	0.024	0	NA	0.0855	0.063	NA	0	0	NA	0.206	0	NA	0.3015	0.137	NA	0.2215	0.042	NA	0	0	NA	0.737	0.6765	NA	0.491	0.344	NA	0	0	NA
SLC4A1	ENSOARG00000007821	11:43485612-43496497:-1	protein-coding	solute carrier family 4 member 1 (Diego blood group)	protein binding (GO:0005515) | transporter activity (GO:0005215) | anion transmembrane transporter activity (GO:0008509) | ankyrin binding (GO:0030506) | chloride transmembrane transporter activity (GO:0015108) | anion:anion antiporter activity (GO:0015301) | protein homodimerization activity (GO:0042803) | inorganic anion exchanger activity (GO:0005452) | bicarbonate transmembrane transporter ac…	anion transport (GO:0006820) | chloride transport (GO:0006821) | transport (GO:0006810) | ion transport (GO:0006811) | bicarbonate transport (GO:0015701)	integral component of membrane (GO:0016021) | blood microparticle (GO:0072562) | basolateral plasma membrane (GO:0016323) | cortical cytoskeleton (GO:0030863) | membrane (GO:0016020) | integral component of plasma membrane (GO:0005887) | extracellular exosome (GO:0070062)	0	0	NA	0.025	0	NA	0	0	NA	0.01	0	NA	0.041	0	NA	0	0	NA	0.107	0.128	NA	0	0	NA	0.0175	0.018	NA	0.099	0.078	NA	0.205	0.061	NA	0.061	0.0875	NA	0	0	NA	11.255	7.222	1.558
VSIG1	ENSOARG00000018478	X:120168558-120200668:-1	protein-coding	V-set and immunoglobulin domain containing 1	protein binding (GO:0005515)	maintenance of gastrointestinal epithelium (GO:0030277) | epithelial cell morphogenesis (GO:0003382)	membrane (GO:0016020) | plasma membrane (GO:0005886)	134.754	73.097	1.843	0.221	0.041	NA	0.357	0	NA	0.233	0.126	NA	0.661	0.6765	NA	0.5245	0.228	NA	0.739	0.709	NA	0.955	0.566	NA	0.9975	0.347	NA	0.261	0.084	NA	2.73	1.658	1.647	2.081	0.7725	NA	0.296	0.172	NA	4.492	3.165	1.419
Male-biased expression (F:M ratio < 0.2 and minimum female TPM >= 10 in at least one tissue)
ENSOARG00000001165	ENSOARG00000001165	JH923009.1:14579-17408:+1	protein-coding	.	protein binding (GO:0005515) | peptide antigen binding (GO:0042605)	antigen processing and presentation (GO:0019882) | immune response (GO:0006955) | antigen processing and presentation of peptide antigen via MHC class I (GO:0002474) | immune system process (GO:0002376)	integral component of membrane (GO:0016021) | MHC class I protein complex (GO:0042612) | membrane (GO:0016020)	10.552	52.715	0.2	23.689	117.252	0.202	23.19	80.183	0.289	12.866	54.622	0.236	10.421	34.1405	0.305	29.1295	204.525	0.142	2.032	5.053	0.402	26.896	129.951	0.207	35.207	128.943	0.273	32.429	158.463	0.205	6.01	13.341	0.45	81.907	475.284	0.172	33.777	225.471	0.15	4.744	28.897	0.164
ENSOARG00000010572	ENSOARG00000010572	20:27133729-27141475:+1	protein-coding	.	protein binding (GO:0005515) | peptide antigen binding (GO:0042605)	antigen processing and presentation (GO:0019882) | immune response (GO:0006955) | antigen processing and presentation of peptide antigen via MHC class I (GO:0002474)	MHC class I protein complex (GO:0042612) | membrane (GO:0016020)	3.022	27.706	0.109	13.767	117.187	0.117	10.807	109.188	0.099	7.551	88.03	0.086	5.2975	31.827	0.166	45.877	298.605	0.154	1.198	5.569	0.215	10.915	227.662	0.048	21.8465	212.955	0.103	28.471	218.493	0.13	6.193	16.268	0.381	47.253	763.03	0.062	20.296	388.258	0.052	3.296	45.29	0.073
ENSOARG00000020792	ENSOARG00000020792	3:59338730-59339242:-1	protein-coding	.	protein binding (GO:0005515)	unknown	unknown	24.207	37.389	0.647	0	0.347	NA	0	0	NA	0.592	0.174	NA	0	1.9775	NA	55.3095	135.085	0.409	0.281	0.245	NA	181.73	282.857	0.642	142.934	481.808	0.297	238.518	356.13	0.67	0	0	NA	68.265	306.53	0.223	224.513	1087.23	0.207	0.549	1.578	NA
ENSOARG00000025188	ENSOARG00000025188	AMGL01124015.1:4500-4691:+1	protein-coding	.	unknown	unknown	cornified envelope (GO:0001533)	0	0	NA	0	0	NA	0	0	NA	0	0	NA	0	0	NA	0	0	NA	0	0	NA	0	0	NA	0	0	NA	0	0.235	NA	0.541	0	NA	0	0.1855	NA	0	0.752	NA	0	0	NA
KRT36	ENSOARG00000016865	11:41180429-41184184:-1	protein-coding	keratin 36	structural molecule activity (GO:0005198) | structural constituent of epidermis (GO:0030280)	regulation of keratinocyte differentiation (GO:0045616)	intermediate filament (GO:0005882) | intermediate filament cytoskeleton (GO:0045111) | extracellular exosome (GO:0070062)	0	0.045	NA	0.104	0.166	NA	0	0	NA	0	0	NA	0.0245	0.112	NA	0.0165	0	NA	0.461	0.119	NA	0.679	0.252	NA	0.135	0.157	NA	0.0825	0.048	NA	0.09	0.03	NA	0.175	0.0675	NA	0.265	0.157	NA	0	0	NA
RNASE9	ENSOARG00000019730	7:23705173-23712476:+1	protein-coding	ribonuclease A family member 9 (inactive)	nucleic acid binding (GO:0003676)	positive regulation of sperm motility involved in capacitation (GO:0060474)	unknown	0.496	5.717	NA	0	0	NA	0	0	NA	0	0	NA	0.142	0.094	NA	0	0	NA	0	0	NA	1.521	11.152	0.136	4.418	16.472	0.268	0.037	0.189	NA	0	0	NA	0.343	3.1245	NA	0	0.067	NA	0.116	0.105	NA
TSHB	ENSOARG00000020127	1:91523680-91528857:+1	protein-coding	thyroid stimulating hormone beta	hormone activity (GO:0005179)	unknown	extracellular region (GO:0005576)	0	0	NA	0	0	NA	0	0	NA	0.233	0	NA	0.117	0	NA	0.8185	0.455	NA	0	0	NA	0.154	0	NA	0	0	NA	0	0	NA	0.034	0.03	NA	0.128	0.0465	NA	0	0	NA	0	0	NA
[truncated: 87 more columns]
