# Supplementary material for: A high resolution atlas of gene expression in the domestic sheep (Ovis aries)
Source: PLoS Genet. 2017 Sep 15;13(9):e1006997. doi: 10.1371/journal.pgen.1006997 (PMC5626511; doi:10.1371/journal.pgen.1006997)
Supplement: S27 Table — (XLSX) [file pgen.1006997.s033.xlsx]

## Sheet: S25 Table
S27 Table. Details of the additional RNA-seq libraries included from Texel sheep (Jiang, et al. (2014) Science. 344(6188):1168-1173)
Tissue type	Sequence (Gb)	Number of reads (millions)	% of reads aligned
Ram abomasum mucosa	14.9	99	90.2
Ram adrenal gland	9.6	63.7	90.4
Ram alveolar macrophages	12.9	85.7	88.4
Ram brain stem	13.1	86.8	91.4
Ram caecum	22.6	149.9	87.9
Ram cerebellum	12.6	83.2	93.3
Ram cerebrum	13.5	89.4	92.8
Ram colon	10.7	70.8	88.1
Ram duodenum	14.6	96.6	90.4
Ram hypothalamus	12.3	81.5	91.7
Ram kidney cortex	13.4	88.9	91.2
Ram kidney medulla	15.6	103.4	91.8
Ram liver	11.3	75	86.8
Ram lung	13.2	87.6	89.6
Ram lymph node mesenteric	9.4	62.2	83.6
Ram lymph node prescapular	7.8	51.4	85.4
Ram skeletal muscle biceps	11.1	73.2	87.8
Ram skeletal muscle longissimus dorsi	9	59.9	89
Ram omentum	14.1	93.6	90.7
Ram pituitary gland	14.7	97.5	93
Ram rectum	12.3	81.3	90.8
Ram rumen	19	126	88.9
Ram skin back	14	93	90
Ram spleen	13.3	88.3	91.7
Ram testes	16.8	111.4	87
Ram testes epididymis	13.5	89.3	91.4
Ram thyroid gland	9.2	60.6	89.4
Ram tonsil	11.9	79	86.6
Ram heart ventricle	20.8	137.7	91.6
Lamb abomasum	11.5	76	85.9
Lamb adrenal gland	10.5	69.6	92.8
Lamb caecum	9.7	64	77.7
Lamb cerebellum	11.1	73.6	93.5
Lamb cerebrum	14.8	98.2	94
Lamb cervix	12.4	82.1	92.9
Lamb colon	9.3	61.8	87.1
Lamb hypothalamus	12.3	81.8	91.2
Lamb kidney cortex	11.8	78.3	92.3
Lamb kidney medulla	22.2	147.2	87.6
Lamb lung	11.7	77.7	89.1
Lamb lymph node mesenteric	11.8	78	92.2
Lamb lymph node prescapular	16.9	111.7	92.6
Lamb mammary gland	25.6	169.6	92.3
Lamb skeletal muscle biceps	21.3	141.3	90.7
Lamb skeletal muscle longissimus dorsi	16.4	108.7	90.4
Lamb omentum	9.6	63.8	91.8
Lamb ovarian follicles	12.6	83.3	81.6
Lamb ovary	10.6	70.3	91.2
Lamb Peyer’s patch	22.8	151	90.3
Lamb pituitary gland	12.1	79.9	93.4
Lamb rectum	12.7	84.2	92.4
Lamb rumen	21	139.2	89.3
Lamb skin back	12.2	80.9	91.6
Lamb spleen	13.5	89.5	92.7
Lamb thyroid gland	10.3	68.4	92.4
Lamb uterus	15.1	100.2	92
Lamb heart ventricle	18	119.5	87.2
Ewe abomasum	17.3	114.3	88.5
Ewe adrenal gland	15.1	100.1	93.3
Ewe alveolar macrophages	16.4	108.5	85.6
Ewe cerebellum	10.1	67.1	87.3
Ewe cervix	6.7	44.1	81.4
Ewe colon	21.7	143.9	91.7
Ewe corpus luteum	8.6	57.1	91.4
Ewe heart ventricle	11.8	78	88.7
Ewe kidney medulla	12.1	80	90.3
Ewe liver	14.3	94.7	83
Ewe lung	15.6	103.5	90
Ewe lymph node mesenteric	9.2	61.2	91
Ewe mammary gland	23.8	157.6	93.1
Ewe skelatal muscle biceps	15.5	102.7	89.7
Ewe muscle skeletal longissimus dorsi	11.9	79	89.5
Ewe omentum	10.2	67.8	89.5
Ewe ovary	8.5	56.3	92.2
Ewe Peyer' s patch	14.1	93.1	89.8
Ewe pituitary	10.5	69.7	92.8
Ewe placenta	5.6	37	90.5
Ewe rectum	12.1	79.9	91.4
Ewe rumen	16.6	109.9	89.4
Ewe skin side	13.2	87.4	91.6
Ewe thyroid gland	11.5	76	92.6
Ewe uterus	14	92.8	91.5
Whole embryo	57.5	381	92.2
